# Supplementary material for: Alternative sulphur metabolism in the fungal pathogen Candida parapsilosis
Source: Nat Commun. 2024 Oct 24;15:9190. doi: 10.1038/s41467-024-53442-8 (PMC11502921; doi:10.1038/s41467-024-53442-8)
Supplement: Supplementary file 4 — Supplementary Data 2 [file 41467_2024_53442_MOESM4_ESM.xlsx]

## Sheet: Media and plates IDs
Media used for baseline growth:
Yeast Nitrogen Base (YNB) supplemented with Ammonium Sulphate (AS)	0.19% YNB without Ammonium Sulphate (AS) and without Amino Acids (AA), 2% Glucose, 2% Bacto agar, 0.5% AS
Synthetic Complete (SC) supplemented with all amino acids (Aas)	0.19% YNB without Ammonium Sulphate and without Amino Acids, 0.5% Ammonium Sulfate, 2% Glucose, 2% Bacto agar, 0.2% Aas mix
YPD	1% yeast extract, 2% peptone, 2% glucose, 2% Bacto agar
PLATES
Plate_YNB	library spotted in 1536 format on YNB plate (Row and Col values locate the mutant strain based on the GREY FRAME in Table S1, "1536 format plate" tab)
Plate_YPD	library spotted in 1536 format on YPD plate (Row and Col values locate the mutant strain based on the GREY FRAME in Table S1, "1536 format plate" tab)
Plate_SC	library spotted in 1536 format on SC plate (Row and Col values locate the mutant strain based on the GREY FRAME in Table S1, "1536 format plate" tab)

## Sheet: Plate _YNB
	Run	Plate	Type	Row	Col	PlateNames	Size	Circularity	Brightness	Redness	AvgRed	AvgGreen	AvgBlue	NSize	RowNumeric	MEAN WT	STRAIN/WT RATIO	Index obs in the graph
1	1	1	Control	A	1	01Control	90.5	0.88755	247.008	-13.9	236.5	250	253.5	39.375	1	45.2903	0.869391	1
177	1	1	Control	A	2	01Control	71	0.8764	247.258	-14.65	236.5	250	253.5	41.875	1	45.2903	0.924591	2
273	1	1	Control	A	3	01Control	71.5	0.85895	247.354	-13.2	237.5	250	253	46.095	1	45.2903	1.01777	3
289	1	1	Control	A	4	01Control	64.5	0.928	246.86	-14.15	236	249.5	253	46.09	1	45.2903	1.01766	4
305	1	1	Control	A	5	01Control	83.5	0.8957	248.201	-11.65	239	250	254	55.905	1	45.2903	1.23437	5
321	1	1	Control	A	6	01Control	72	0.9625	247.729	-10.85	239	248.5	253	48.34	1	45.2903	1.06734	6
337	1	1	Control	A	7	01Control	81	0.88045	247.569	-11.45	238.5	250	253.5	51.115	1	45.2903	1.12861	7
353	1	1	Control	A	8	01Control	52.5	0.85955	248.013	-11.2	239	249.5	253.5	34.905	1	45.2903	0.770695	8
369	1	1	Control	A	9	01Control	69	0.9186	247.084	-11.7	237	248	253.5	45.155	1	45.2903	0.997012	9
17	1	1	Control	A	10	01Control	72	0.9012	248.037	-10.2	239.5	249.5	253.5	47.335	1	45.2903	1.04515	10
33	1	1	Control	A	11	01Control	71.5	0.88805	247.405	-10.75	238.5	248.5	253	42.43	1	45.2903	0.936845	11
49	1	1	Control	A	12	01Control	80.5	0.90295	248.124	-10.15	239.5	249.5	254	47.31	1	45.2903	1.04459	12
65	1	1	Control	A	13	01Control	71.5	0.86785	247.813	-9.75	239.5	249	253.5	49.365	1	45.2903	1.08997	13
81	1	1	Control	A	14	01Control	72	0.8653	248.076	-10	240	249.5	253.5	45.26	1	45.2903	0.999331	14
97	1	1	Control	A	15	01Control	72.5	0.8894	247.071	-10.85	238	249	253	43.945	1	45.2903	0.970296	15
113	1	1	Control	A	16	01Control	69	0.9303	248.128	-11	239.5	249.5	253	43.13	1	45.2903	0.952301	16
129	1	1	Control	A	17	01Control	74	0.88515	248.628	-10.5	240.5	250	254	46.76	1	45.2903	1.03245	17
145	1	1	Control	A	18	01Control	75	0.84625	248.42	-11	240	250.5	253.5	47.13	1	45.2903	1.04062	18
161	1	1	Control	A	19	01Control	68.5	0.874	247.717	-12.55	238	250	253.5	40.985	1	45.2903	0.90494	19
193	1	1	Control	A	20	01Control	68.5	0.8439	247.552	-13.3	237.5	250.5	253.5	42.26	1	45.2903	0.933091	20
209	1	1	Control	A	21	01Control	73.5	0.91115	248.124	-12.5	238	251	253.5	45.865	1	45.2903	1.01269	21
225	1	1	Control	A	22	01Control	72.5	0.9418	247.483	-13.55	237	250	253	43.67	1	45.2903	0.964224	22
241	1	1	Control	A	23	01Control	69.5	0.87185	247.248	-15.05	236	250.5	253	41.725	1	45.2903	0.921279	23
257	1	1	Control	A	24	01Control	96	0.8839	247.863	-13.35	238.5	250.5	253	41.48	1	45.2903	0.915869	24
2	1	1	Control	B	1	01Control	57.5	0.85295	245.508	-13.4	235	247.5	252.5	33.845	2	45.2903	0.74729	25
178	1	1	Control	B	2	01Control	49.5	0.8606	245.859	-14.35	235	248.5	253	41.655	2	45.2903	0.919733	26
274	1	1	Control	B	3	01Control	57	0.87715	247.944	-12.75	238.5	250.5	253.5	48.56	2	45.2903	1.07219	27
290	1	1	Control	B	4	01Control	62.5	0.92445	248.347	-12.05	239.5	251	253	61.35	2	45.2903	1.35459	28
306	1	1	Control	B	5	01Control	52.5	0.8448	246.23	-12.55	236.5	248.5	253	47.985	2	45.2903	1.0595	29
322	1	1	Control	B	6	01Control	52	0.867	246.777	-11.55	237.5	248.5	253.5	45.385	2	45.2903	1.00209	30
338	1	1	Control	B	7	01Control	58.5	0.86325	248.344	-9.85	240	250	253.5	48.005	2	45.2903	1.05994	31
354	1	1	Control	B	8	01Control	65.5	0.91955	247.572	-10.6	239	249	253	54.335	2	45.2903	1.1997	32
370	1	1	Control	B	9	01Control	40	0.864	246.202	-11.4	236.5	247	253	35.59	2	45.2903	0.785819	33
18	1	1	Control	B	10	01Control	43	0.88865	246.864	-11.35	238	248.5	253	37.94	2	45.2903	0.837707	34
34	1	1	Control	B	11	01Control	54.5	0.8734	248.595	-9	241	249.5	253.5	44.37	2	45.2903	0.97968	35
50	1	1	Control	B	12	01Control	47	0.851	247.172	-9.95	239	248	253	37.98	2	45.2903	0.83859	36
66	1	1	Control	B	13	01Control	64	0.8608	248.368	-8.5	241.5	249	253.5	58.82	2	45.2903	1.29873	37
82	1	1	Control	B	14	01Control	53	0.87	247.578	-9.45	240	248.5	253	43.865	2	45.2903	0.968529	38
98	1	1	Control	B	15	01Control	60	0.925	247.656	-9.85	239.5	249	253	48.64	2	45.2903	1.07396	39
114	1	1	Control	B	16	01Control	59	0.91265	247.31	-10.1	239	248.5	253	48.785	2	45.2903	1.07716	40
130	1	1	Control	B	17	01Control	44.5	0.90525	247.196	-11.7	238	249	253.5	37.42	2	45.2903	0.826225	41
146	1	1	Control	B	18	01Control	52.5	0.84955	248.322	-11.2	239.5	250.5	253.5	44.57	2	45.2903	0.984096	42
162	1	1	Control	B	19	01Control	57	0.8889	248.912	-11.05	240.5	250.5	253	46.125	2	45.2903	1.01843	43
194	1	1	Control	B	20	01Control	53	0.85375	246.411	-12.2	237	248.5	253	44.465	2	45.2903	0.981777	44
210	1	1	Control	B	21	01Control	51.5	0.8619	246.406	-13	236	249	253	43.21	2	45.2903	0.954067	45
226	1	1	Control	B	22	01Control	57	0.85945	246.489	-13.6	236.5	249	253	44.49	2	45.2903	0.982329	46
242	1	1	Control	B	23	01Control	55.5	0.8965	246.859	-14.25	236	249.5	253	44.505	2	45.2903	0.98266	47
258	1	1	Control	B	24	01Control	76	0.97125	248.107	-12.95	238.5	251	253	44.125	2	45.2903	0.97427	48
3	1	1	Control	C	1	01Control	71	0.8928	247.11	-15.55	235.5	251	253.5	44	3	45.2903	0.97151	49
179	1	1	Control	C	2	01Control	51	0.8824	246.239	-14.85	235	249.5	253	47.85	3	45.2903	1.05652	50
275	1	1	Control	C	3	01Control	39	0.8165	245.734	-16	233.5	248.5	253	37.39	3	45.2903	0.825563	51
291	1	1	Control	C	4	01Control	12.5	0.66665	239.608	-19.5	223.5	241.5	253	13.315	3	45.2903	0.293992	52
307	1	1	Control	C	5	01Control	71	0.86625	247.925	-13.15	238	250.5	254	70.07	3	45.2903	1.54713	53
323	1	1	Control	C	6	01Control	54	0.842	246.688	-13.6	236.5	249	253.5	53.785	3	45.2903	1.18756	54
339	1	1	Control	C	7	01Control	37	0.9057	246.204	-13.25	236	248	253	34.77	3	45.2903	0.767714	55
355	1	1	Control	C	8	01Control	34	0.92465	246.252	-14.15	235	249	253.5	32.04	3	45.2903	0.707436	56
371	1	1	Control	C	9	01Control	59	0.95215	248.528	-10.95	240	250	254	57.795	3	45.2903	1.2761	57
19	1	1	Control	C	10	01Control	51	0.8824	247.784	-10.65	239	249.5	253	48.585	3	45.2903	1.07275	58
35	1	1	Control	C	11	01Control	49	0.888	247.704	-11.1	238.5	249.5	254	43.335	3	45.2903	0.956827	59
51	1	1	Control	C	12	01Control	74	0.8749	247.997	-11.35	239	250	253	64.22	3	45.2903	1.41796	60
67	1	1	Control	C	13	01Control	52	0.87965	247.652	-10.95	239	249	253	51.965	3	45.2903	1.14738	61
83	1	1	Control	C	14	01Control	42.5	0.8752	247.026	-12.7	237	249.5	253	38.935	3	45.2903	0.859676	62
99	1	1	Control	C	15	01Control	49	0.8571	247.299	-10.75	239	248	253	44.705	3	45.2903	0.987076	63
115	1	1	Control	C	16	01Control	50.5	0.8924	247.406	-11.75	237.5	249.5	253	46.065	3	45.2903	1.0171	64
131	1	1	Control	C	17	01Control	50.5	0.86535	247.584	-11.4	238.5	249	253	46.09	3	45.2903	1.01766	65
147	1	1	Control	C	18	01Control	49	0.8211	248.454	-12.35	239	251	254	46.03	3	45.2903	1.01633	66
163	1	1	Control	C	19	01Control	40	0.81025	245.353	-15.3	234	248	253	35.48	3	45.2903	0.78339	67
195	1	1	Control	C	20	01Control	52	0.8549	246.691	-12.25	237.5	249.5	252	48.495	3	45.2903	1.07076	68
211	1	1	Control	C	21	01Control	41.5	0.8721	245.764	-15.8	234.5	249	253	38.125	3	45.2903	0.841791	69
227	1	1	Control	C	22	01Control	51.5	0.8448	246.52	-14.9	235.5	249	253	45.13	3	45.2903	0.99646	70
243	1	1	Control	C	23	01Control	41	0.80385	244.079	-18.5	230	248	252.5	36.405	3	45.2903	0.803814	71
259	1	1	Control	C	24	01Control	71	0.868	246.772	-16.05	235	250.5	253	44.69	3	45.2903	0.986745	72
4	1	1	Control	D	1	01Control	76.5	0.9405	246.933	-14.95	236	250	253	48.625	4	45.2903	1.07363	73
180	1	1	Control	D	2	01Control	52.5	0.88765	246.233	-15.8	234	249.5	254	48.76	4	45.2903	1.07661	74
276	1	1	Control	D	3	01Control	51.5	0.84375	243.707	-11.95	236	246.5	250	49.81	4	45.2903	1.09979	75
292	1	1	Control	D	4	01Control	47	0.8078	246.483	-13.95	235.5	249.5	253	49.92	4	45.2903	1.10222	76
308	1	1	Control	D	5	01Control	41.5	0.84275	246.22	-13.95	235.5	249	253	41.81	4	45.2903	0.923155	77
324	1	1	Control	D	6	01Control	44.5	0.83175	246.807	-12.95	236.5	249	253	43.665	4	45.2903	0.964113	78
340	1	1	Control	D	7	01Control	44.5	0.8318	246.974	-12.7	237.5	249	253	40.825	4	45.2903	0.901407	79
356	1	1	Control	D	8	01Control	55	0.9066	246.717	-11.8	237.5	248.5	253	51.905	4	45.2903	1.14605	80
372	1	1	Control	D	9	01Control	36	0.93005	246.238	-12.7	236	248	253	35.715	4	45.2903	0.788579	81
20	1	1	Control	D	10	01Control	46	0.90245	247.025	-11.45	238	248.5	253	45.615	4	45.2903	1.00717	82
36	1	1	Control	D	11	01Control	49	0.8788	247.498	-11.6	238	249	253	44.245	4	45.2903	0.97692	83
52	1	1	Control	D	12	01Control	51.5	0.8835	246.828	-10.55	238	248	253	45.62	4	45.2903	1.00728	84
68	1	1	Control	D	13	01Control	38	0.80265	246.458	-12.75	236	248	253	39.145	4	45.2903	0.864313	85
84	1	1	Control	D	14	01Control	48.5	0.83035	246.792	-11.75	238	248	253	45.06	4	45.2903	0.994915	86
100	1	1	Control	D	15	01Control	49	0.8199	245.861	-11.65	236.5	247	252	46.01	4	45.2903	1.01589	87
116	1	1	Control	D	16	01Control	45.5	0.98915	247.56	-11.5	239	249.5	253	42.505	4	45.2903	0.938501	88
132	1	1	Control	D	17	01Control	46.5	0.8001	247.418	-11.8	238.5	249.5	253	43.785	4	45.2903	0.966763	89
148	1	1	Control	D	18	01Control	35	0.8301	246.842	-13.45	236.5	249	253	33.785	4	45.2903	0.745965	90
164	1	1	Control	D	19	01Control	53	0.88725	247.508	-13.15	237.5	250.5	253	48.255	4	45.2903	1.06546	91
196	1	1	Control	D	20	01Control	50	0.8675	246.583	-14.1	236	249	253	47.505	4	45.2903	1.0489	92
212	1	1	Control	D	21	01Control	33	0.85855	244.171	-17.65	231	248	253.5	31.765	4	45.2903	0.701364	93
228	1	1	Control	D	22	01Control	44.5	0.9318	247.209	-14.2	237	250	253.5	40.005	4	45.2903	0.883301	94
244	1	1	Control	D	23	01Control	61	0.8768	246.13	-16	234.5	250	253	54.58	4	45.2903	1.20511	95
260	1	1	Control	D	24	01Control	69.5	0.83955	246.888	-15.85	235.5	250.5	253	44.65	4	45.2903	0.985862	96
5	1	1	Control	E	1	01Control	58.5	0.895	244.871	-15.65	233	248	251.5	41.28	5	45.2903	0.911453	97
181	1	1	Control	E	2	01Control	50.5	0.8787	245.545	-16.8	232.5	248.5	254	50.795	5	45.2903	1.12154	98
277	1	1	Control	E	3	01Control	44.5	0.8538	245.037	-16.55	232.5	248	253	47.615	5	45.2903	1.05133	99
293	1	1	Control	E	4	01Control	21.5	0.734	243.603	-18.35	228.5	246.5	253.5	25.985	5	45.2903	0.573743	100
309	1	1	Control	E	5	01Control	41.5	0.7957	245.744	-16.3	233	249	254	44.64	5	45.2903	0.985641	101
325	1	1	Control	E	6	01Control	59	0.9153	246.432	-12.85	236.5	248.5	253	64.315	5	45.2903	1.42006	102
341	1	1	Control	E	7	01Control	42.5	0.89645	246.585	-13.4	236.5	249	253.5	42.295	5	45.2903	0.933864	103
357	1	1	Control	E	8	01Control	40	0.8705	246.417	-13.85	235.5	249	253	40.905	5	45.2903	0.903173	104
373	1	1	Control	E	9	01Control	40.5	0.95	247.549	-11.8	238.5	249.5	253	44.83	5	45.2903	0.989836	105
21	1	1	Control	E	10	01Control	52.5	0.95275	247.241	-11.35	238.5	248.5	253	56.25	5	45.2903	1.24199	106
37	1	1	Control	E	11	01Control	60.5	0.9504	246.399	-12.15	236.5	248	253	58.81	5	45.2903	1.29851	107
53	1	1	Control	E	12	01Control	47.5	0.9262	248.305	-10.8	240	250	253	46.01	5	45.2903	1.01589	108
69	1	1	Control	E	13	01Control	40.5	0.8388	245.168	-13.1	235	246.5	252	45.255	5	45.2903	0.99922	109
85	1	1	Control	E	14	01Control	42.5	0.8627	245.387	-13.05	235	247	253	43.88	5	45.2903	0.968861	110
101	1	1	Control	E	15	01Control	32	0.9219	246.579	-13.5	236.5	249	253	33.48	5	45.2903	0.739231	111
117	1	1	Control	E	16	01Control	51	0.8333	247.435	-11.7	238	249.5	253	52.985	5	45.2903	1.1699	112
133	1	1	Control	E	17	01Control	41	0.8795	246.674	-14.1	235.5	249.5	253	41.905	5	45.2903	0.925253	113
149	1	1	Control	E	18	01Control	46	0.8493	246.668	-12.9	236.5	249	253	46.64	5	45.2903	1.0298	114
165	1	1	Control	E	19	01Control	45	0.8702	247.246	-13.25	237.5	249.5	253	44.685	5	45.2903	0.986635	115
197	1	1	Control	E	20	01Control	48	0.8865	245.778	-14.5	234	249	253	48.59	5	45.2903	1.07286	116
213	1	1	Control	E	21	01Control	26.5	0.83975	245.379	-15.05	233.5	248.5	253	27.21	5	45.2903	0.600791	117
229	1	1	Control	E	22	01Control	42	0.9048	245.415	-16.5	233	249	253	40.815	5	45.2903	0.901186	118
245	1	1	Control	E	23	01Control	76	0.88825	246.463	-16.25	234	250	253.5	74.75	5	45.2903	1.65046	119
261	1	1	Control	E	24	01Control	52.5	0.8819	245.964	-18	233	250	253.5	35.53	5	45.2903	0.784494	120
6	1	1	Control	F	1	01Control	66.5	0.87965	246.066	-16.35	234	249	254	45.375	6	45.2903	1.00187	121
182	1	1	Control	F	2	01Control	44.5	0.92175	245.075	-16.5	232	248	253.5	42.855	6	45.2903	0.946229	122
278	1	1	Control	F	3	01Control	40.5	0.87775	243.97	-16.95	231	246.5	253	41.13	6	45.2903	0.908141	123
294	1	1	Control	F	4	01Control	38	0.80335	244.815	-16.1	232.5	248	253	42.715	6	45.2903	0.943138	124
310	1	1	Control	F	5	01Control	41	0.8236	246.094	-14.6	234.5	249	253.5	43.195	6	45.2903	0.953736	125
326	1	1	Control	F	6	01Control	46.5	0.8394	246.605	-14	236	249	254	48.96	6	45.2903	1.08103	126
342	1	1	Control	F	7	01Control	41.5	0.83465	247.223	-12.4	237.5	249	253.5	41.455	6	45.2903	0.915317	127
358	1	1	Control	F	8	01Control	42	0.8532	246.972	-12.05	237.5	248.5	253	43.595	6	45.2903	0.962568	128
374	1	1	Control	F	9	01Control	8	0.7	241.017	-17.8	227	242.5	252.5	8.41	6	45.2903	0.185691	129
22	1	1	Control	F	10	01Control	31.5	0.7876	244.973	-13.4	233.5	247	253	31.91	6	45.2903	0.704566	130
38	1	1	Control	F	11	01Control	52.5	0.91525	246.924	-10.7	238	248	253	50.695	6	45.2903	1.11933	131
54	1	1	Control	F	12	01Control	40	0.9287	246.991	-11.75	237.5	248.5	252.5	36.565	6	45.2903	0.807347	132
70	1	1	Control	F	13	01Control	62.5	0.9199	247.488	-11.75	238.5	249.5	253	67.5	6	45.2903	1.49038	133
86	1	1	Control	F	14	01Control	48	0.8542	246.169	-12.05	236.5	248	253	46.94	6	45.2903	1.03642	134
102	1	1	Control	F	15	01Control	49.5	0.86975	246.556	-12.05	237	248	253	48.21	6	45.2903	1.06447	135
118	1	1	Control	F	16	01Control	45.5	0.8901	247.882	-11.45	239	250	253	44.22	6	45.2903	0.976368	136
134	1	1	Control	F	17	01Control	47	0.80695	247.506	-12.95	237.5	250	253	46.365	6	45.2903	1.02373	137
150	1	1	Control	F	18	01Control	46.5	0.8322	246.259	-12.9	236	248.5	253	46.18	6	45.2903	1.01964	138
166	1	1	Control	F	19	01Control	50.5	0.89165	245.289	-13.9	234	247.5	252.5	48.415	6	45.2903	1.06899	139
198	1	1	Control	F	20	01Control	45	0.9667	247.488	-13.35	237.5	250	253	44.595	6	45.2903	0.984648	140
214	1	1	Control	F	21	01Control	45.5	0.9343	246.296	-15.05	235	249.5	253	45.165	6	45.2903	0.997233	141
230	1	1	Control	F	22	01Control	56	0.943	245.315	-15.9	233	248	253	51.8	6	45.2903	1.14373	142
246	1	1	Control	F	23	01Control	37	0.82005	244.724	-18.2	231	248.5	253	34.905	6	45.2903	0.770695	143
262	1	1	Control	F	24	01Control	72	0.89935	246.6	-16.55	234.5	250.5	254	48.555	6	45.2903	1.07208	144
7	1	1	Control	G	1	01Control	53.5	0.86715	243.441	-18.65	229	247	253	35.6	7	45.2903	0.78604	145
183	1	1	Control	G	2	01Control	43	0.90805	243.512	-17.3	230	246.5	253	42.91	7	45.2903	0.947443	146
279	1	1	Control	G	3	01Control	44	0.93325	242.687	-17	229	245	252.5	44.38	7	45.2903	0.979901	147
295	1	1	Control	G	4	01Control	46	0.83035	244.795	-14.55	233.5	246.5	253	51.76	7	45.2903	1.14285	148
311	1	1	Control	G	5	01Control	40	0.86335	245.008	-14.2	234	246.5	253	43.055	7	45.2903	0.950645	149
327	1	1	Control	G	6	01Control	46	0.9034	245.109	-13.7	234	247	253	49.675	7	45.2903	1.09681	150
343	1	1	Control	G	7	01Control	45.5	0.8992	245.605	-13.35	235	247	253	44.965	7	45.2903	0.992817	151
359	1	1	Control	G	8	01Control	46	0.9063	246.187	-12.4	236.5	248	253	47.54	7	45.2903	1.04967	152
375	1	1	Control	G	9	01Control	45	0.8671	246.502	-12.05	237	248	253	47.245	7	45.2903	1.04316	153
23	1	1	Control	G	10	01Control	40.5	0.8702	247.838	-11.5	239	249.5	254	42.485	7	45.2903	0.938059	154
39	1	1	Control	G	11	01Control	26	0.84725	246.149	-13.35	236	248.5	253	25.275	7	45.2903	0.558066	155
55	1	1	Control	G	12	01Control	48	0.77905	247.023	-11.95	238	248.5	253.5	44.985	7	45.2903	0.993259	156
71	1	1	Control	G	13	01Control	51.5	0.89895	246.162	-12.25	236.5	248	252.5	55.59	7	45.2903	1.22741	157
87	1	1	Control	G	14	01Control	38	0.9233	246.275	-13.3	236	248.5	253	36.94	7	45.2903	0.815627	158
103	1	1	Control	G	15	01Control	44	0.955	246.894	-12.5	237	248.5	253	43	7	45.2903	0.94943	159
119	1	1	Control	G	16	01Control	46.5	0.859	247.188	-11.95	238	249	253	45.175	7	45.2903	0.997454	160
135	1	1	Control	G	17	01Control	48	0.8284	245.344	-12.65	235	247	253	47.26	7	45.2903	1.04349	161
151	1	1	Control	G	18	01Control	46.5	0.81535	245.572	-13.1	235.5	247.5	253	45.66	7	45.2903	1.00816	162
167	1	1	Control	G	19	01Control	50	0.8394	245.36	-13.95	234.5	247.5	253	46.86	7	45.2903	1.03466	163
199	1	1	Control	G	20	01Control	45.5	0.90205	246.384	-14.1	235	249	253.5	44.66	7	45.2903	0.986083	164
215	1	1	Control	G	21	01Control	0	0	0	0	0	0	0	0	7	45.2903	0	165
231	1	1	Control	G	22	01Control	46	0.9608	245.84	-16.55	233.5	249.5	253.5	43.26	7	45.2903	0.955171	166
247	1	1	Control	G	23	01Control	60.5	0.8818	244.361	-17.65	231	248	253	55.625	7	45.2903	1.22819	167
263	1	1	Control	G	24	01Control	57	0.89955	245.265	-17.8	232	249.5	253	39.135	7	45.2903	0.864092	168
8	1	1	Control	H	1	01Control	70.5	0.87925	242.397	-17.65	228.5	243.5	253	50.055	8	45.2903	1.1052	169
184	1	1	Control	H	2	01Control	50.5	0.8327	240.869	-16.8	226.5	242.5	252	51.935	8	45.2903	1.14671	170
280	1	1	Control	H	3	01Control	43	0.9446	242.401	-16.1	229.5	243.5	252.5	46.44	8	45.2903	1.02538	171
296	1	1	Control	H	4	01Control	32	0.83825	244.207	-16	231.5	246	253.5	38.18	8	45.2903	0.843006	172
312	1	1	Control	H	5	01Control	42.5	0.84265	243.551	-14.7	231.5	245	253	47.895	8	45.2903	1.05751	173
328	1	1	Control	H	6	01Control	37	0.8431	243.715	-14.8	231.5	245.5	253	40.98	8	45.2903	0.904829	174
344	1	1	Control	H	7	01Control	44	0.9127	244.944	-13.45	234	246	253	46.55	8	45.2903	1.02781	175
360	1	1	Control	H	8	01Control	44	0.9159	244.77	-13.35	234	246	252.5	45.35	8	45.2903	1.00132	176
376	1	1	Control	H	9	01Control	44	0.85555	246.585	-12.15	237	248	253.5	48.18	8	45.2903	1.0638	177
24	1	1	Control	H	10	01Control	36.5	0.8119	246.041	-12.7	235.5	248	253	40.045	8	45.2903	0.884185	178
40	1	1	Control	H	11	01Control	42.5	0.83935	246.05	-12.05	236	247	253	42.91	8	45.2903	0.947443	179
56	1	1	Control	H	12	01Control	46.5	0.8226	246.301	-12.7	236	248	253	45.105	8	45.2903	0.995908	180
72	1	1	Control	H	13	01Control	31	0.8208	244.803	-14.35	233.5	247	253	35.06	8	45.2903	0.774117	181
88	1	1	Control	H	14	01Control	52.5	0.8996	245.541	-13.15	235	247	253	53.945	8	45.2903	1.19109	182
104	1	1	Control	H	15	01Control	34.5	0.95715	246.521	-13.65	235.5	249	253	35.62	8	45.2903	0.786482	183
120	1	1	Control	H	16	01Control	42.5	0.9681	247.093	-13.1	237	249	253.5	43.69	8	45.2903	0.964665	184
136	1	1	Control	H	17	01Control	41	0.82	246.014	-12.25	236	247.5	253	42.77	8	45.2903	0.944352	185
152	1	1	Control	H	18	01Control	37.5	0.89575	245.731	-13.65	235	248	253	41.245	8	45.2903	0.91068	186
168	1	1	Control	H	19	01Control	46	0.873	245.613	-14.2	234.5	247.5	253	45.43	8	45.2903	1.00308	187
200	1	1	Control	H	20	01Control	43	0.94185	245.615	-14.75	234	247.5	253.5	44.75	8	45.2903	0.98807	188
216	1	1	Control	H	21	01Control	53	0.8481	244.062	-15.9	231.5	246	253	55.675	8	45.2903	1.22929	189
232	1	1	Control	H	22	01Control	43.5	0.8864	244.803	-16.25	232	247.5	253.5	43.435	8	45.2903	0.959035	190
248	1	1	Control	H	23	01Control	46.5	0.8674	244.163	-17.6	230.5	247.5	253	45.49	8	45.2903	1.00441	191
264	1	1	Control	H	24	01Control	65.5	0.8975	243.579	-18.35	229	246	253	46.315	8	45.2903	1.02262	192
9	1	1	Control	I	1	01Control	61	0.8847	241.422	-18.25	227	242.5	253	42.73	9	45.2903	0.943469	193
185	1	1	Control	I	2	01Control	40.5	0.83	240.481	-17.15	226.5	242	252	44.075	9	45.2903	0.973166	194
281	1	1	Control	I	3	01Control	39	0.9138	240.825	-17.3	225.5	242	253	45.48	9	45.2903	1.00419	195
297	1	1	Control	I	4	01Control	40	0.8924	240.623	-16.2	227	241.5	252	48.655	9	45.2903	1.07429	196
313	1	1	Control	I	5	01Control	29.5	0.8452	236.733	-13.05	227	238	244.5	34.675	9	45.2903	0.765616	197
329	1	1	Control	I	6	01Control	42.5	0.9201	243.771	-14.4	231.5	244.5	253	48.565	9	45.2903	1.0723	198
345	1	1	Control	I	7	01Control	49.5	0.82155	243.71	-13.6	232.5	244.5	253	54.14	9	45.2903	1.1954	199
361	1	1	Control	I	8	01Control	41.5	0.8841	244.288	-12.8	233.5	244.5	253	46.545	9	45.2903	1.0277	200
377	1	1	Control	I	9	01Control	52	0.8173	243.862	-12.5	233.5	244	252	58.65	9	45.2903	1.29498	201
25	1	1	Control	I	10	01Control	51	0.82855	239.696	-8	233	241	243.5	58.445	9	45.2903	1.29045	202
41	1	1	Control	I	11	01Control	32	0.8311	244.688	-14	233.5	246.5	253	34.66	9	45.2903	0.765285	203
57	1	1	Control	I	12	01Control	40	0.8357	244.709	-14.8	232.5	247	253	42.175	9	45.2903	0.931215	204
73	1	1	Control	I	13	01Control	31.5	0.8375	244.26	-14.9	232	246	253	37.45	9	45.2903	0.826888	205
89	1	1	Control	I	14	01Control	39.5	0.8469	245.981	-14.2	235	248.5	253.5	42.865	9	45.2903	0.94645	206
105	1	1	Control	I	15	01Control	29.5	0.8493	244.155	-15.1	232	246	253	32.11	9	45.2903	0.708982	207
121	1	1	Control	I	16	01Control	39.5	0.93685	245.075	-14.05	233.5	247	253	42.825	9	45.2903	0.945566	208
137	1	1	Control	I	17	01Control	43.5	0.8967	245.804	-12.7	235.5	247.5	253.5	48.355	9	45.2903	1.06767	209
153	1	1	Control	I	18	01Control	38.5	0.89125	244.152	-14.2	232.5	245.5	252.5	44.175	9	45.2903	0.975374	210
169	1	1	Control	I	19	01Control	50	0.86	243.408	-14.6	231.5	245	253	52.95	9	45.2903	1.16912	211
201	1	1	Control	I	20	01Control	41	0.86495	242.498	-14.45	231	244	251	44.94	9	45.2903	0.992265	212
217	1	1	Control	I	21	01Control	34.5	0.896	242.314	-18	228	244.5	253	37.98	9	45.2903	0.83859	213
233	1	1	Control	I	22	01Control	43.5	0.90615	242.657	-19.05	227.5	245.5	253.5	46.93	9	45.2903	1.0362	214
249	1	1	Control	I	23	01Control	13.5	0.81595	241.865	-17.6	227.5	244	253	14.705	9	45.2903	0.324683	215
265	1	1	Control	I	24	01Control	60.5	0.8879	243	-19.3	228	246	253	45.42	9	45.2903	1.00286	216
10	1	1	Control	J	1	01Control	62	0.84845	240.148	-17.85	225.5	241	253	45.175	10	45.2903	0.997454	217
186	1	1	Control	J	2	01Control	40.5	0.8024	239.458	-17.85	224.5	240	252	43.38	10	45.2903	0.957821	218
282	1	1	Control	J	3	01Control	54.5	0.9145	237.236	-17.05	222.5	237	250.5	58.205	10	45.2903	1.28515	219
298	1	1	Control	J	4	01Control	38	0.88185	240.695	-15.85	226	241.5	252.5	45.29	10	45.2903	0.999993	220
314	1	1	Control	J	5	01Control	34.5	0.87455	240.7	-15.95	227.5	241	252	38.16	10	45.2903	0.842564	221
330	1	1	Control	J	6	01Control	35.5	0.879	242.465	-14.8	229.5	243	253	39.78	10	45.2903	0.878334	222
346	1	1	Control	J	7	01Control	49.5	0.81665	241.71	-13.8	229.5	242	252	52.835	10	45.2903	1.16659	223
362	1	1	Control	J	8	01Control	37	0.8734	242.564	-14.4	230	243	253	41.05	10	45.2903	0.906375	224
378	1	1	Control	J	9	01Control	39	0.82105	242.702	-13.5	231	242.5	253	43.765	10	45.2903	0.966321	225
26	1	1	Control	J	10	01Control	32	0.9219	244.896	-13.15	234	246	253	35.635	10	45.2903	0.786813	226
42	1	1	Control	J	11	01Control	42	0.78965	243.022	-13.35	231.5	243.5	253	42.83	10	45.2903	0.945677	227
58	1	1	Control	J	12	01Control	37	0.8555	243.578	-13.95	232	245	252.5	35.985	10	45.2903	0.794541	228
74	1	1	Control	J	13	01Control	46	0.81625	243.384	-13.5	232.5	244.5	252	52.41	10	45.2903	1.1572	229
90	1	1	Control	J	14	01Control	46	0.86185	243.57	-14	232	244.5	253	47.285	10	45.2903	1.04404	230
106	1	1	Control	J	15	01Control	47.5	0.8918	243.603	-12.95	233	245	251	49.585	10	45.2903	1.09483	231
122	1	1	Control	J	16	01Control	43	0.8723	244.037	-13.9	232.5	245.5	253	45.085	10	45.2903	0.995467	232
138	1	1	Control	J	17	01Control	40.5	0.8568	244.084	-13.5	233	245	253	42.525	10	45.2903	0.938943	233
154	1	1	Control	J	18	01Control	45.5	0.8966	243.45	-14	232	244.5	253	46.255	10	45.2903	1.0213	234
170	1	1	Control	J	19	01Control	67.5	0.94425	241.731	-14.75	230	243	251	67.98	10	45.2903	1.50098	235
202	1	1	Control	J	20	01Control	3	0.5	232.472	-23.3	211	233	252.5	3.175	10	45.2903	0.0701033	236
218	1	1	Control	J	21	01Control	0	0	0	0	0	0	0	0	10	45.2903	0	237
234	1	1	Control	J	22	01Control	45	0.84945	242.149	-18.3	227.5	244.5	253	43.455	10	45.2903	0.959477	238
250	1	1	Control	J	23	01Control	47	0.80475	241.591	-18.85	227	243.5	252.5	46.11	10	45.2903	1.0181	239
266	1	1	Control	J	24	01Control	64	0.8895	241.074	-19.35	225.5	243	253	46.215	10	45.2903	1.02042	240
11	1	1	Control	K	1	01Control	56.5	0.89025	236.878	-18.2	221	237	251	44.895	11	45.2903	0.991272	241
187	1	1	Control	K	2	01Control	39	0.8636	238.032	-18.9	221.5	238.5	253	42.46	11	45.2903	0.937507	242
283	1	1	Control	K	3	01Control	37.5	0.9028	236.66	-16.8	222	236	251	42.595	11	45.2903	0.940488	243
299	1	1	Control	K	4	01Control	32	0.90295	237.557	-18.05	222.5	237	252.5	40.735	11	45.2903	0.89942	244
315	1	1	Control	K	5	01Control	41	0.9081	238.939	-15.95	225	239	252	48.53	11	45.2903	1.07153	245
331	1	1	Control	K	6	01Control	39.5	0.78495	240.275	-15.6	227	240	252.5	46.72	11	45.2903	1.03157	246
347	1	1	Control	K	7	01Control	41.5	0.9066	240.673	-14.65	227.5	240	252.5	46.18	11	45.2903	1.01964	247
363	1	1	Control	K	8	01Control	40	0.94735	241.775	-13.85	230	241.5	252.5	43.76	11	45.2903	0.966211	248
379	1	1	Control	K	9	01Control	42.5	0.85165	241.449	-13.85	229	241.5	252.5	50.155	11	45.2903	1.10741	249
27	1	1	Control	K	10	01Control	39.5	0.84745	241.537	-14.55	229	241.5	252.5	45.295	11	45.2903	1.0001	250
43	1	1	Control	K	11	01Control	37	0.8769	242.24	-15.35	229.5	242.5	253	39.785	11	45.2903	0.878444	251
59	1	1	Control	K	12	01Control	34.5	0.83905	241.652	-15	229	242.5	252	35.945	11	45.2903	0.793658	252
75	1	1	Control	K	13	01Control	31.5	0.85875	242.63	-14.15	231	243	253	38.21	11	45.2903	0.843668	253
91	1	1	Control	K	14	01Control	30.5	0.84815	242.621	-15.35	231	243.5	253	33.535	11	45.2903	0.740445	254
107	1	1	Control	K	15	01Control	39.5	0.85715	243.035	-15	231	244	253	43.42	11	45.2903	0.958704	255
123	1	1	Control	K	16	01Control	42.5	0.9285	241.449	-14.75	228.5	242	253	46.495	11	45.2903	1.0266	256
139	1	1	Control	K	17	01Control	21	0.675	233.896	-14.05	214.5	234	252	23.32	11	45.2903	0.5149	257
155	1	1	Control	K	18	01Control	41.5	0.915	242.066	-14.65	229.5	242.5	252.5	45.075	11	45.2903	0.995246	258
171	1	1	Control	K	19	01Control	38	0.8989	240.369	-17.7	225.5	241	253	40.79	11	45.2903	0.900634	259
203	1	1	Control	K	20	01Control	43.5	1	241.924	-16.85	228.5	243.5	252.5	48.06	11	45.2903	1.06115	260
219	1	1	Control	K	21	01Control	39	0.87105	240.775	-17.5	226	241.5	253	43.47	11	45.2903	0.959808	261
235	1	1	Control	K	22	01Control	46.5	0.8064	240.569	-18.65	225.5	242	252.5	48.84	11	45.2903	1.07838	262
251	1	1	Control	K	23	01Control	43	0.8025	240.017	-19.45	223.5	241.5	253	44.43	11	45.2903	0.981004	263
267	1	1	Control	K	24	01Control	53.5	0.8736	239.823	-20.4	223.5	241.5	253	41.095	11	45.2903	0.907368	264
12	1	1	Control	L	1	01Control	59.5	0.86445	234.22	-16.85	218.5	233.5	249.5	50.535	12	45.2903	1.1158	265
188	1	1	Control	L	2	01Control	38	0.85075	235.842	-18.6	219.5	235	251.5	43.35	12	45.2903	0.957158	266
284	1	1	Control	L	3	01Control	25.5	0.77745	236.802	-18.55	221	236.5	252	31.645	12	45.2903	0.698715	267
300	1	1	Control	L	4	01Control	37	0.8846	237.052	-16.25	222.5	236	252	50.74	12	45.2903	1.12033	268
316	1	1	Control	L	5	01Control	35	0.90035	237.402	-16.4	222.5	237	251.5	45.24	12	45.2903	0.998889	269
332	1	1	Control	L	6	01Control	32	0.86605	238.222	-15.7	224	237.5	251.5	41.98	12	45.2903	0.926909	270
348	1	1	Control	L	7	01Control	34.5	0.88385	239.15	-15.5	224.5	239	252	42.47	12	45.2903	0.937728	271
364	1	1	Control	L	8	01Control	36	0.8496	240.364	-14.95	227	239	253	44.375	12	45.2903	0.97979	272
380	1	1	Control	L	9	01Control	29	0.8212	238.103	-16.5	223	236.5	253	36.845	12	45.2903	0.813529	273
28	1	1	Control	L	10	01Control	41	0.82075	237.015	-11.65	227	237	245.5	51.02	12	45.2903	1.12651	274
44	1	1	Control	L	11	01Control	20.5	0.45555	118.614	-8.35	110.5	118.5	126.5	24	12	45.2903	0.529915	275
60	1	1	Control	L	12	01Control	41.5	0.8781	240.258	-15.25	227	240.5	252	47.81	12	45.2903	1.05563	276
76	1	1	Control	L	13	01Control	19	0.7362	240.226	-18.1	225	241.5	253	25.05	12	45.2903	0.553098	277
92	1	1	Control	L	14	01Control	37.5	0.8518	241.013	-16.65	227	241.5	253	45.18	12	45.2903	0.997564	278
108	1	1	Control	L	15	01Control	41.5	0.90995	241.477	-14.35	229	241	252	49.745	12	45.2903	1.09836	279
124	1	1	Control	L	16	01Control	1	0.16665	111.222	-11.95	98	108.5	125.5	1.205	12	45.2903	0.0266061	280
140	1	1	Control	L	17	01Control	44	0.8425	240.111	-16.1	226.5	240.5	252	53.42	12	45.2903	1.1795	281
156	1	1	Control	L	18	01Control	18.5	0.94945	240.572	-16.7	226	241.5	252.5	22.855	12	45.2903	0.504633	282
172	1	1	Control	L	19	01Control	46	0.9783	239.62	-16.45	225.5	240	252	53.27	12	45.2903	1.17619	283
204	1	1	Control	L	20	01Control	3.5	0.54165	232.792	-21.15	211.5	232	253	4.18	12	45.2903	0.0922935	284
220	1	1	Control	L	21	01Control	47	0.8678	237.529	-17.95	222.5	238.5	251	57.87	12	45.2903	1.27776	285
236	1	1	Control	L	22	01Control	0	0	0	0	0	0	0	0	12	45.2903	0	286
252	1	1	Control	L	23	01Control	35.5	0.83065	238.453	-22.1	220.5	240.5	253.5	41.135	12	45.2903	0.908252	287
268	1	1	Control	L	24	01Control	62.5	0.86975	237.462	-21.3	220	238.5	252.5	51.84	12	45.2903	1.14462	288
13	1	1	Control	M	1	01Control	53.5	0.85055	234.081	-18.3	218	233	250	43.03	13	45.2903	0.950093	289
189	1	1	Control	M	2	01Control	40	0.83395	233.223	-18.8	216	231.5	251	46.71	13	45.2903	1.03135	290
285	1	1	Control	M	3	01Control	37.5	0.7468	231.854	-14.75	220	232	243	44.985	13	45.2903	0.993259	291
301	1	1	Control	M	4	01Control	32	0.8477	234.184	-16.95	218	232.5	250	42.66	13	45.2903	0.941923	292
317	1	1	Control	M	5	01Control	34	0.90715	235.181	-15.6	220.5	233.5	251	42.575	13	45.2903	0.940047	293
333	1	1	Control	M	6	01Control	30	0.81705	236.469	-16.05	221.5	234.5	252.5	37.145	13	45.2903	0.820153	294
349	1	1	Control	M	7	01Control	31	0.87255	237.344	-16.3	222.5	236	252.5	35.955	13	45.2903	0.793878	295
365	1	1	Control	M	8	01Control	47.5	0.89355	237.416	-14.25	224	236	251	55.325	13	45.2903	1.22156	296
381	1	1	Control	M	9	01Control	33.5	0.9259	239.578	-14.55	226.5	238	253	41.25	13	45.2903	0.910791	297
29	1	1	Control	M	10	01Control	33	0.9117	239.232	-14.6	225.5	238	252.5	39.14	13	45.2903	0.864202	298
45	1	1	Control	M	11	01Control	56	0.92645	236.83	-14.2	223.5	235.5	249.5	63.605	13	45.2903	1.40438	299
61	1	1	Control	M	12	01Control	51	0.8627	237.083	-15.8	222.5	236	251.5	56.025	13	45.2903	1.23702	300
77	1	1	Control	M	13	01Control	36	0.875	239.544	-16	226	239.5	252	46.125	13	45.2903	1.01843	301
93	1	1	Control	M	14	01Control	42	0.9241	239.158	-15.35	225.5	238.5	252.5	47.76	13	45.2903	1.05453	302
109	1	1	Control	M	15	01Control	40.5	0.8061	238.742	-15.25	225.5	238	251.5	45.7	13	45.2903	1.00905	303
125	1	1	Control	M	16	01Control	39.5	0.80285	238.314	-16.6	224	238	252	44.45	13	45.2903	0.981446	304
141	1	1	Control	M	17	01Control	35	0.8571	239.941	-16.05	226	240	252	39.885	13	45.2903	0.880652	305
157	1	1	Control	M	18	01Control	33	0.8318	239.343	-16.65	224.5	239.5	252	38.975	13	45.2903	0.860559	306
173	1	1	Control	M	19	01Control	34.5	0.9655	237.252	-18.15	221	237	251.5	38.715	13	45.2903	0.854819	307
205	1	1	Control	M	20	01Control	40	0.8521	236.745	-18.6	221	237.5	251	46.06	13	45.2903	1.01699	308
221	1	1	Control	M	21	01Control	41.5	0.8746	236.621	-18.95	220	236.5	252	48.87	13	45.2903	1.07904	309
237	1	1	Control	M	22	01Control	0	0	0	0	0	0	0	0	13	45.2903	0	310
253	1	1	Control	M	23	01Control	46	0.85	235.483	-20.7	218	235.5	251	50.875	13	45.2903	1.12331	311
269	1	1	Control	M	24	01Control	60	0.85735	234.559	-21.5	215.5	234.5	252	48.095	13	45.2903	1.06193	312
14	1	1	Control	N	1	01Control	55.5	0.8422	231.847	-18.45	214.5	229.5	250	46.435	14	45.2903	1.02527	313
190	1	1	Control	N	2	01Control	31	0.78545	231.558	-19.5	213.5	229	251	37.18	14	45.2903	0.820926	314
286	1	1	Control	N	3	01Control	33.5	0.8	233.035	-17.6	216	230.5	250.5	42.4	14	45.2903	0.936183	315
302	1	1	Control	N	4	01Control	34	0.88225	232.674	-17.2	216	230	251	48.025	14	45.2903	1.06038	316
318	1	1	Control	N	5	01Control	43	0.8766	234.124	-15.75	219	231.5	250	56.69	14	45.2903	1.2517	317
334	1	1	Control	N	6	01Control	32	0.90545	233.783	-18.3	217	231.5	251.5	40.71	14	45.2903	0.898868	318
350	1	1	Control	N	7	01Control	33.5	0.91045	235.289	-14.65	220.5	233	251.5	40.51	14	45.2903	0.894452	319
366	1	1	Control	N	8	01Control	32.5	0.88695	235.727	-15.55	221	233	252	39.295	14	45.2903	0.867625	320
382	1	1	Control	N	9	01Control	43	0.9212	234.232	-14.55	220.5	232.5	249	55.805	14	45.2903	1.23216	321
30	1	1	Control	N	10	01Control	32	0.9375	237.439	-15.45	223	236	252	40.78	14	45.2903	0.900413	322
46	1	1	Control	N	11	01Control	47	0.9107	235.891	-17.2	219.5	234	253	55.86	14	45.2903	1.23338	323
62	1	1	Control	N	12	01Control	38.5	0.88485	236.714	-15.75	222	235	251.5	44.255	14	45.2903	0.977141	324
78	1	1	Control	N	13	01Control	15.5	0.7738	237.547	-18.15	222	236.5	254	20.7	14	45.2903	0.457051	325
94	1	1	Control	N	14	01Control	37.5	0.80015	236.771	-18.05	221	236	252	45.22	14	45.2903	0.998448	326
110	1	1	Control	N	15	01Control	39.5	0.83965	236.94	-16.4	222.5	236	251.5	47.84	14	45.2903	1.0563	327
126	1	1	Control	N	16	01Control	43	0.86725	236.274	-16	222	235	251	51.865	14	45.2903	1.14517	328
142	1	1	Control	N	17	01Control	35	0.86335	237.076	-16.65	222	236.5	251	42.86	14	45.2903	0.946339	329
158	1	1	Control	N	18	01Control	37.5	0.89315	236.468	-17.85	220.5	235.5	251.5	46.065	14	45.2903	1.0171	330
174	1	1	Control	N	19	01Control	35	0.8283	235.514	-16.4	221.5	236	247	40.965	14	45.2903	0.904498	331
206	1	1	Control	N	20	01Control	39	0.8205	234.957	-19.15	218.5	235	251	47.63	14	45.2903	1.05166	332
222	1	1	Control	N	21	01Control	40.5	0.86005	233.95	-20.3	216	233.5	251	50.195	14	45.2903	1.10829	333
238	1	1	Control	N	22	01Control	40.5	0.89185	233.948	-20.15	216.5	233.5	250.5	47.025	14	45.2903	1.0383	334
254	1	1	Control	N	23	01Control	41.5	0.87665	234.002	-22.25	215	234	252	48.59	14	45.2903	1.07286	335
270	1	1	Control	N	24	01Control	56.5	0.8481	234.505	-22.1	216	235	251	47	14	45.2903	1.03775	336
15	1	1	Control	O	1	01Control	37.5	0.8005	231.408	-19.35	213	228.5	250.5	29.945	15	45.2903	0.661179	337
191	1	1	Control	O	2	01Control	38.5	0.8132	226.987	-20.7	207	224	249	40.855	15	45.2903	0.902069	338
287	1	1	Control	O	3	01Control	37.5	0.80355	231.195	-17.1	215	228.5	249.5	41.17	15	45.2903	0.909024	339
303	1	1	Control	O	4	01Control	33.5	0.7404	233.735	-18.85	216	231.5	252	40.585	15	45.2903	0.896108	340
319	1	1	Control	O	5	01Control	32.5	0.85115	232.628	-17.6	215.5	229.5	251.5	37.145	15	45.2903	0.820153	341
335	1	1	Control	O	6	01Control	27.5	0.8416	234.926	-17.05	219	232	253	32.425	15	45.2903	0.715937	342
351	1	1	Control	O	7	01Control	48.5	0.8386	229.176	-17.55	210.5	224.5	250.5	53.4	15	45.2903	1.17906	343
367	1	1	Control	O	8	01Control	56	0.9	231.353	-17.25	214	227.5	251	61.065	15	45.2903	1.3483	344
383	1	1	Control	O	9	01Control	48	0.87535	233.164	-15.9	217.5	230	251	53.755	15	45.2903	1.1869	345
31	1	1	Control	O	10	01Control	43	0.9233	233.466	-16.1	217.5	229.5	252	46.245	15	45.2903	1.02108	346
47	1	1	Control	O	11	01Control	45.5	0.91415	234.666	-17.25	218	232	252.5	46.93	15	45.2903	1.0362	347
63	1	1	Control	O	12	01Control	50	0.9101	231.376	-14.05	218.5	230	244	49.38	15	45.2903	1.0903	348
79	1	1	Control	O	13	01Control	46.5	0.83485	235.599	-16.6	220	233	252.5	54.81	15	45.2903	1.21019	349
95	1	1	Control	O	14	01Control	43	0.82715	235.672	-17.55	219.5	234.5	251	44.74	15	45.2903	0.987849	350
111	1	1	Control	O	15	01Control	37.5	0.85025	235.271	-17.15	218.5	233	252.5	39.35	15	45.2903	0.868839	351
127	1	1	Control	O	16	01Control	42.5	0.9208	234.053	-16.95	218.5	231.5	251	44.95	15	45.2903	0.992486	352
143	1	1	Control	O	17	01Control	50.5	0.8675	233.074	-16.15	218	231.5	247.5	54.73	15	45.2903	1.20843	353
159	1	1	Control	O	18	01Control	48	0.84305	235.125	-20.2	217	234	252.5	52.065	15	45.2903	1.14958	354
175	1	1	Control	O	19	01Control	38	0.7947	234.568	-18.35	218	233.5	250.5	38.76	15	45.2903	0.855812	355
207	1	1	Control	O	20	01Control	42	0.78335	230.378	-21.5	211	228.5	251	44.005	15	45.2903	0.971621	356
223	1	1	Control	O	21	01Control	36.5	0.8543	232.949	-20.25	214.5	231.5	251	39.255	15	45.2903	0.866742	357
239	1	1	Control	O	22	01Control	40	0.864	232.821	-22.15	213.5	232.5	251.5	42.58	15	45.2903	0.940157	358
255	1	1	Control	O	23	01Control	22	0.39775	116.973	-10.65	107.5	117	125.5	25.23	15	45.2903	0.557073	359
271	1	1	Control	O	24	01Control	59	0.82455	232.19	-21.4	214.5	233	248	45.295	15	45.2903	1.0001	360
16	1	1	Control	P	1	01Control	86	0.84985	232.086	-17.15	216	229.5	249.5	44.995	16	45.2903	0.99348	361
192	1	1	Control	P	2	01Control	63	0.83815	231.913	-17.2	215.5	229	250	45.395	16	45.2903	1.00231	362
288	1	1	Control	P	3	01Control	62.5	0.8296	232.37	-16.05	217	229.5	250	46.885	16	45.2903	1.03521	363
304	1	1	Control	P	4	01Control	58	0.8978	233.178	-16.95	216.5	229.5	251.5	50.27	16	45.2903	1.10995	364
320	1	1	Control	P	5	01Control	56.5	0.86945	233.501	-15.9	218	230	251.5	43.62	16	45.2903	0.96312	365
336	1	1	Control	P	6	01Control	55.5	0.88025	234.887	-14.75	220.5	232	250.5	43.1	16	45.2903	0.951638	366
352	1	1	Control	P	7	01Control	55.5	0.90045	235.694	-15.45	221	233	251.5	39.535	16	45.2903	0.872924	367
368	1	1	Control	P	8	01Control	56	0.8571	236.293	-15.25	221.5	233.5	252.5	41.385	16	45.2903	0.913772	368
384	1	1	Control	P	9	01Control	22	0.7727	235.56	-16.9	219.5	233	253	17.67	16	45.2903	0.39015	369
32	1	1	Control	P	10	01Control	64.5	0.95895	237.225	-14.85	223	235	252	49.045	16	45.2903	1.0829	370
48	1	1	Control	P	11	01Control	68.5	0.89925	236.41	-15.6	221.5	234	253	49.72	16	45.2903	1.09781	371
64	1	1	Control	P	12	01Control	0	0	0	0	0	0	0	0	16	45.2903	0	372
80	1	1	Control	P	13	01Control	14	0.6206	238.592	-17.75	223	238	254	11.915	16	45.2903	0.263081	373
96	1	1	Control	P	14	01Control	65	0.853	236.751	-16.25	221.5	235	252	46.895	16	45.2903	1.03543	374
112	1	1	Control	P	15	01Control	59.5	0.9147	238.887	-16.1	224	237.5	254	42.545	16	45.2903	0.939384	375
128	1	1	Control	P	16	01Control	64.5	0.8899	236.976	-16.7	221.5	235	252.5	46.9	16	45.2903	1.03554	376
144	1	1	Control	P	17	01Control	63	0.89215	236.82	-16.9	221	235.5	251.5	45.8	16	45.2903	1.01125	377
160	1	1	Control	P	18	01Control	63.5	0.8787	235.81	-18	219.5	235	251.5	46.435	16	45.2903	1.02527	378
176	1	1	Control	P	19	01Control	34.5	0.8483	234.995	-21.6	216	234.5	253	24.58	16	45.2903	0.542721	379
208	1	1	Control	P	20	01Control	62	0.8235	235.72	-18.6	219	235	252	44.93	16	45.2903	0.992044	380
224	1	1	Control	P	21	01Control	68	0.84765	234.43	-18.75	217.5	233.5	251	51.115	16	45.2903	1.12861	381
240	1	1	Control	P	22	01Control	69	0.8572	233.501	-20.95	215	232.5	251.5	48.71	16	45.2903	1.07551	382
256	1	1	Control	P	23	01Control	37	0.88765	231.796	-23.5	211	230	253	24.53	16	45.2903	0.541617	383
272	1	1	Control	P	24	01Control	82	0.87285	234.129	-22.45	214.5	234	252	41.55	16	45.2903	0.917415	384

## Sheet: Plate_YPD
	Run	Plate	Type	Row	Col	PlateNames	Size	Circularity	Brightness	Redness	AvgRed	AvgGreen	AvgBlue	NSize	RowNumeric	MEAN WT	STRAIN/WT RATIO	Index obs in the graph
1	1	1	Control	A	1	01Control	50	0.8923	228.078	0.75	232	234	216	37.965	1	33.2225	1.14275	1
177	1	1	Control	A	2	01Control	32	0.87515	224.66	0.5	227	228.5	218	28.475	1	33.2225	0.8571	2
273	1	1	Control	A	3	01Control	37.5	0.83095	222.522	1.4	226	226.5	216	30.39	1	33.2225	0.914742	3
289	1	1	Control	A	4	01Control	35.5	0.8452	224.291	1.85	227.5	228.5	215.5	32.65	1	33.2225	0.982768	4
305	1	1	Control	A	5	01Control	69.5	0.88875	232.281	1.25	235	235	223	52.11	1	33.2225	1.56852	5
321	1	1	Control	A	6	01Control	45	0.8527	228.006	2.5	232.5	232	219.5	33.15	1	33.2225	0.997818	6
337	1	1	Control	A	7	01Control	57	0.9282	231.509	2.85	236	235.5	222.5	40.23	1	33.2225	1.21093	7
353	1	1	Control	A	8	01Control	31	0.8341	223.158	3.9	230	228	214	22.68	1	33.2225	0.68267	8
369	1	1	Control	A	9	01Control	25.5	0.7833	229.156	5.2	237	235	215.5	18.635	1	33.2225	0.560915	9
17	1	1	Control	A	10	01Control	55	0.92725	232.548	4.65	238	236.5	221	37.03	1	33.2225	1.11461	10
33	1	1	Control	A	11	01Control	48.5	0.8391	230.757	5	237.5	235	218	28.035	1	33.2225	0.843856	11
49	1	1	Control	A	12	01Control	73.5	0.86135	235.227	3.9	240.5	238.5	225	44.125	1	33.2225	1.32817	12
65	1	1	Control	A	13	01Control	49	0.8942	229.625	6	237	234	216.5	32.225	1	33.2225	0.969975	13
81	1	1	Control	A	14	01Control	52.5	0.86025	230.785	6.05	238.5	235.5	217	34.345	1	33.2225	1.03379	14
97	1	1	Control	A	15	01Control	49	0.86795	230.084	6	237.5	234.5	217.5	33.615	1	33.2225	1.01181	15
113	1	1	Control	A	16	01Control	54.5	0.857	236.732	3.6	242	240.5	227	37.215	1	33.2225	1.12017	16
129	1	1	Control	A	17	01Control	61	0.90165	233.361	4.5	239	237.5	221.5	36.445	1	33.2225	1.097	17
145	1	1	Control	A	18	01Control	85.5	0.9007	237.389	4	242.5	241.5	227.5	56.135	1	33.2225	1.68967	18
161	1	1	Control	A	19	01Control	50	0.88185	232.301	4.05	238	237	220	29.21	1	33.2225	0.879223	19
193	1	1	Control	A	20	01Control	44.5	0.8779	229.463	3.8	235	234	218.5	29.81	1	33.2225	0.897283	20
209	1	1	Control	A	21	01Control	31.5	0.89605	228.078	4.05	234	233	214	22.2	1	33.2225	0.668222	21
225	1	1	Control	A	22	01Control	49.5	0.91585	230.179	2.3	234.5	235	219	33.13	1	33.2225	0.997216	22
241	1	1	Control	A	23	01Control	46	0.8558	225.92	1.8	230	231.5	214.5	28.535	1	33.2225	0.858906	23
257	1	1	Control	A	24	01Control	65.5	0.9311	232.735	2.1	238	239	220.5	44.78	1	33.2225	1.34788	24
2	1	1	Control	B	1	01Control	42	0.83295	223.436	4.45	230.5	228.5	210.5	32.8	2	33.2225	0.987283	25
178	1	1	Control	B	2	01Control	31	0.86695	221.17	4.45	226.5	225.5	209	24.75	2	33.2225	0.744977	26
274	1	1	Control	B	3	01Control	39.5	0.88225	226.923	4.25	232	230	218.5	32.76	2	33.2225	0.986079	27
290	1	1	Control	B	4	01Control	45	0.8835	227.514	4.4	233	231	217.5	37.54	2	33.2225	1.12996	28
306	1	1	Control	B	5	01Control	44	0.92335	226.537	4.25	231.5	230.5	215	33	2	33.2225	0.993303	29
322	1	1	Control	B	6	01Control	45.5	0.897	228.053	5.85	234	231	215	32.725	2	33.2225	0.985025	30
338	1	1	Control	B	7	01Control	55	0.8725	227.869	6.9	235	231	215.5	38.745	2	33.2225	1.16623	31
354	1	1	Control	B	8	01Control	48	0.87675	230.348	7	238	233.5	216	32.535	2	33.2225	0.979306	32
370	1	1	Control	B	9	01Control	17.5	0.8524	224.158	8.55	235	229	209	12.06	2	33.2225	0.363007	33
18	1	1	Control	B	10	01Control	48	0.9173	220.782	10.7	232	224.5	204.5	31.45	2	33.2225	0.946648	34
34	1	1	Control	B	11	01Control	55	0.8912	230.749	8.85	240	234	214.5	32	2	33.2225	0.963203	35
50	1	1	Control	B	12	01Control	50	0.85655	230.149	8.75	239	233.5	216	29.655	2	33.2225	0.892618	36
66	1	1	Control	B	13	01Control	61	0.8881	232.704	8.45	241.5	236.5	217.5	38.015	2	33.2225	1.14425	37
82	1	1	Control	B	14	01Control	50.5	0.86675	228.962	9.8	239.5	234	213	32.75	2	33.2225	0.985778	38
98	1	1	Control	B	15	01Control	54	0.86405	229.939	9.15	240	234	215.5	35.965	2	33.2225	1.08255	39
114	1	1	Control	B	16	01Control	51.5	0.86875	228.576	9.25	238	232.5	213	32.72	2	33.2225	0.984875	40
130	1	1	Control	B	17	01Control	40.5	0.8432	229.717	8.1	239	234	218	25.695	2	33.2225	0.773422	41
146	1	1	Control	B	18	01Control	52	0.84845	230.332	8.1	239	234	215.5	32.705	2	33.2225	0.984423	42
162	1	1	Control	B	19	01Control	57.5	0.82245	229.382	7.85	238	233	215	34.435	2	33.2225	1.0365	43
194	1	1	Control	B	20	01Control	53	0.8697	231.091	8.15	240	235	218	34.95	2	33.2225	1.052	44
210	1	1	Control	B	21	01Control	58	0.92025	230.652	6.8	238.5	234.5	218	39.145	2	33.2225	1.17827	45
226	1	1	Control	B	22	01Control	50.5	0.9	229.535	6.1	237	234	215	33.185	2	33.2225	0.998871	46
242	1	1	Control	B	23	01Control	55.5	0.87235	230.347	5.75	236.5	234	216	34.445	2	33.2225	1.0368	47
258	1	1	Control	B	24	01Control	44.5	0.86605	226.428	7.55	236.5	232.5	209	29.505	2	33.2225	0.888103	48
3	1	1	Control	C	1	01Control	32	0.8666	217.121	-0.15	219	220.5	210.5	26.57	3	33.2225	0.799759	49
179	1	1	Control	C	2	01Control	34.5	0.81565	217.997	0.2	219.5	220	213.5	33.135	3	33.2225	0.997366	50
275	1	1	Control	C	3	01Control	38	0.9625	217.892	-0.15	218.5	219.5	214.5	34.855	3	33.2225	1.04914	51
291	1	1	Control	C	4	01Control	19	0.74535	221.025	0.1	222.5	223	216	17.88	3	33.2225	0.538189	52
307	1	1	Control	C	5	01Control	75.5	0.86605	229.914	0.05	230.5	231.5	227	64.17	3	33.2225	1.93152	53
323	1	1	Control	C	6	01Control	48	0.851	224.265	1.25	226	226	220	40.18	3	33.2225	1.20942	54
339	1	1	Control	C	7	01Control	22.5	0.81335	220.275	2.95	223.5	222	213.5	17.995	3	33.2225	0.541651	55
355	1	1	Control	C	8	01Control	27	0.90265	216	3.85	221	219	207.5	21.095	3	33.2225	0.634961	56
371	1	1	Control	C	9	01Control	52	0.8654	232.798	3.1	236	234	226.5	40.795	3	33.2225	1.22793	57
19	1	1	Control	C	10	01Control	43	0.87235	223.917	4.25	228.5	226	215	31.96	3	33.2225	0.961999	58
35	1	1	Control	C	11	01Control	45.5	0.8507	225.033	4.6	230	227.5	216	29.12	3	33.2225	0.876514	59
51	1	1	Control	C	12	01Control	87	0.88525	230.792	3.4	234	232	224.5	58.695	3	33.2225	1.76672	60
67	1	1	Control	C	13	01Control	46.5	0.85165	225.315	5.5	231	227.5	216	33.45	3	33.2225	1.00685	61
83	1	1	Control	C	14	01Control	40	0.8759	223.807	5.95	230.5	226.5	213.5	29.16	3	33.2225	0.877718	62
99	1	1	Control	C	15	01Control	32	0.9375	231.854	4.65	236.5	234	223.5	24.66	3	33.2225	0.742268	63
115	1	1	Control	C	16	01Control	47.5	0.8411	225.505	5.2	231	227.5	216	34.245	3	33.2225	1.03078	64
131	1	1	Control	C	17	01Control	47.5	0.81815	225.334	4.85	230.5	228	216.5	33.475	3	33.2225	1.0076	65
147	1	1	Control	C	18	01Control	49	0.8191	225.496	4.65	230.5	227.5	217	35.695	3	33.2225	1.07442	66
163	1	1	Control	C	19	01Control	67	0.84615	230.468	2.55	233.5	233	223.5	45.875	3	33.2225	1.38084	67
195	1	1	Control	C	20	01Control	47.5	0.83205	229.264	3.15	233	232	221.5	35.57	3	33.2225	1.07066	68
211	1	1	Control	C	21	01Control	43	0.9167	226.107	2.7	230	229	218	31.83	3	33.2225	0.958086	69
227	1	1	Control	C	22	01Control	52	0.83665	228.716	2.1	232	231	222	39.49	3	33.2225	1.18865	70
243	1	1	Control	C	23	01Control	34	0.86125	212.414	1.95	215.5	215	205.5	23.84	3	33.2225	0.717586	71
259	1	1	Control	C	24	01Control	42	0.8151	226.595	1.1	228.5	230	218	31.82	3	33.2225	0.957785	72
4	1	1	Control	D	1	01Control	38.5	0.8793	218.807	1.55	221	222	211.5	30.92	4	33.2225	0.930695	73
180	1	1	Control	D	2	01Control	39	0.8929	219.294	1.05	221	221	214.5	37.545	4	33.2225	1.13011	74
276	1	1	Control	D	3	01Control	39.5	0.95735	223.85	1.3	225.5	225	219.5	36.22	4	33.2225	1.09022	75
292	1	1	Control	D	4	01Control	35	0.8372	220.191	1.7	222	221	216	33.43	4	33.2225	1.00625	76
308	1	1	Control	D	5	01Control	31	0.8621	217.063	2.9	220	218.5	212	26.975	4	33.2225	0.81195	77
324	1	1	Control	D	6	01Control	24	0.8	224.138	3.55	227.5	225.5	218	20.275	4	33.2225	0.610279	78
340	1	1	Control	D	7	01Control	46	0.9251	225.929	4.1	229.5	227	218.5	37.17	4	33.2225	1.11882	79
356	1	1	Control	D	8	01Control	37.5	0.84285	224.755	5.15	230	226	217	30.095	4	33.2225	0.905862	80
372	1	1	Control	D	9	01Control	14.5	0.8031	219.265	6.4	226.5	222	208	11.18	4	33.2225	0.336519	81
20	1	1	Control	D	10	01Control	45	0.857	225.894	5.95	231	227	218	33.845	4	33.2225	1.01874	82
36	1	1	Control	D	11	01Control	49	0.8301	223.595	6.15	229.5	225	214.5	32.505	4	33.2225	0.978403	83
52	1	1	Control	D	12	01Control	52	0.8253	225.66	6.25	231.5	227.5	217	35.47	4	33.2225	1.06765	84
68	1	1	Control	D	13	01Control	38.5	0.83245	227.767	6.55	233.5	229.5	218.5	28.38	4	33.2225	0.85424	85
84	1	1	Control	D	14	01Control	47	0.8597	224.185	7.6	231.5	226.5	213.5	34.68	4	33.2225	1.04387	86
100	1	1	Control	D	15	01Control	45	0.85475	223.715	7.9	231	226	213	35.5	4	33.2225	1.06855	87
116	1	1	Control	D	16	01Control	46.5	0.83835	224.785	6.9	231.5	226.5	214	33.975	4	33.2225	1.02265	88
132	1	1	Control	D	17	01Control	45.5	0.849	223.736	8.05	231.5	225.5	213	32.54	4	33.2225	0.979457	89
148	1	1	Control	D	18	01Control	36.5	0.7944	223.857	6.85	230.5	225.5	214.5	26.5	4	33.2225	0.797652	90
164	1	1	Control	D	19	01Control	45	0.837	224.087	5.95	230.5	226.5	214.5	31.295	4	33.2225	0.941982	91
196	1	1	Control	D	20	01Control	44.5	0.81885	225.053	4.7	230	227	217	33.765	4	33.2225	1.01633	92
212	1	1	Control	D	21	01Control	35.5	0.899	230.945	3.4	234.5	233	223	26.93	4	33.2225	0.810595	93
228	1	1	Control	D	22	01Control	70	0.9375	235.921	2.4	238.5	238	230	54.74	4	33.2225	1.64768	94
244	1	1	Control	D	23	01Control	52.5	0.91465	224.925	3.25	229	227.5	216.5	37.4	4	33.2225	1.12574	95
260	1	1	Control	D	24	01Control	44.5	0.83645	223.532	4.15	229.5	228	212.5	34.105	4	33.2225	1.02656	96
5	1	1	Control	E	1	01Control	33.5	0.85335	216.922	0.5	218.5	220	210.5	28.59	5	33.2225	0.860561	97
181	1	1	Control	E	2	01Control	32.5	0.82855	218.037	-0.35	218	220	213.5	31.44	5	33.2225	0.946347	98
277	1	1	Control	E	3	01Control	54.5	0.89375	222.329	-0.75	222	223.5	220	50.99	5	33.2225	1.5348	99
293	1	1	Control	E	4	01Control	34	0.83555	218.962	-0.25	219	220.5	216	32.31	5	33.2225	0.972534	100
309	1	1	Control	E	5	01Control	49	0.82345	224.91	0.7	226	225.5	222.5	41.565	5	33.2225	1.25111	101
325	1	1	Control	E	6	01Control	53.5	0.85375	227.357	1.05	228.5	228	224	44.905	5	33.2225	1.35164	102
341	1	1	Control	E	7	01Control	35	0.87935	217.732	2.35	220	219	213.5	28.12	5	33.2225	0.846414	103
357	1	1	Control	E	8	01Control	23	0.8923	214.567	3.05	218	215.5	209	18.1	5	33.2225	0.544811	104
373	1	1	Control	E	9	01Control	25	0.8575	214.787	4.4	219.5	217	207.5	19.665	5	33.2225	0.591918	105
21	1	1	Control	E	10	01Control	46	0.87085	220.307	4.55	224.5	221.5	213.5	34.515	5	33.2225	1.0389	106
37	1	1	Control	E	11	01Control	61.5	0.865	228.213	3.5	232	229	222	40.05	5	33.2225	1.20551	107
53	1	1	Control	E	12	01Control	48	0.82285	224.55	4.4	229	225.5	218	32.335	5	33.2225	0.973286	108
69	1	1	Control	E	13	01Control	45.5	0.82855	224.657	4.7	229	226.5	217	32.61	5	33.2225	0.981564	109
85	1	1	Control	E	14	01Control	45	0.94565	222.278	4.85	227.5	224	214.5	32.685	5	33.2225	0.983821	110
101	1	1	Control	E	15	01Control	23.5	0.8074	209.12	7.05	215.5	210.5	199.5	18.205	5	33.2225	0.547972	111
117	1	1	Control	E	16	01Control	47.5	0.835	222.552	5.15	228	224	214	34.115	5	33.2225	1.02686	112
133	1	1	Control	E	17	01Control	50.5	0.85135	225.161	4.15	229	227	217.5	35.495	5	33.2225	1.0684	113
149	1	1	Control	E	18	01Control	42	0.89685	220.175	5.3	225.5	222	211.5	30.65	5	33.2225	0.922568	114
165	1	1	Control	E	19	01Control	39.5	0.84575	221.393	4.2	225	223	214.5	27.22	5	33.2225	0.819324	115
197	1	1	Control	E	20	01Control	41	0.82575	226.335	2.95	229.5	227.5	220.5	30.825	5	33.2225	0.927835	116
213	1	1	Control	E	21	01Control	36.5	0.85	219.271	2.95	222.5	221	212.5	26.63	5	33.2225	0.801565	117
229	1	1	Control	E	22	01Control	43.5	0.88795	224.425	1.7	227	226.5	218.5	33.57	5	33.2225	1.01046	118
245	1	1	Control	E	23	01Control	61.5	1	227.426	0.25	228.5	229.5	222.5	42.87	5	33.2225	1.29039	119
261	1	1	Control	E	24	01Control	62	0.91595	224.965	2.1	228	228	217.5	46.985	5	33.2225	1.41425	120
6	1	1	Control	F	1	01Control	33.5	0.8405	213.964	0.55	215.5	216.5	208.5	34.4	6	33.2225	1.03544	121
182	1	1	Control	F	2	01Control	31.5	0.8375	215.175	-0.25	215.5	216	214	33.495	6	33.2225	1.0082	122
278	1	1	Control	F	3	01Control	29.5	0.86345	214.924	-1	215.5	215.5	213.5	30.73	6	33.2225	0.924976	123
294	1	1	Control	F	4	01Control	31.5	0.8844	216.344	0.7	217	217	213.5	33.74	6	33.2225	1.01558	124
310	1	1	Control	F	5	01Control	35.5	0.9353	216.827	0.8	218	218	213.5	34.065	6	33.2225	1.02536	125
326	1	1	Control	F	6	01Control	32.5	0.9259	217.551	1.5	219.5	217.5	214.5	31.02	6	33.2225	0.933705	126
342	1	1	Control	F	7	01Control	34.5	0.81815	217.846	2.05	220	218.5	213.5	30.74	6	33.2225	0.925277	127
358	1	1	Control	F	8	01Control	35	0.90955	225.608	3.25	229	226.5	220	31.515	6	33.2225	0.948604	128
374	1	1	Control	F	9	01Control	0	0	0	0	0	0	0	0	6	33.2225	0	129
22	1	1	Control	F	10	01Control	10.5	0.39585	108.042	1.8	110	108.5	105	8.855	6	33.2225	0.266536	130
38	1	1	Control	F	11	01Control	46.5	0.8297	220.508	4.4	224.5	221.5	214	34.035	6	33.2225	1.02446	131
54	1	1	Control	F	12	01Control	40.5	0.81175	218.952	5.1	224	220	212	31.26	6	33.2225	0.940929	132
70	1	1	Control	F	13	01Control	78	0.875	230.561	2.5	233	231	227	63.81	6	33.2225	1.92069	133
86	1	1	Control	F	14	01Control	40.5	0.85165	220.929	5.7	226	222	213	33.575	6	33.2225	1.01061	134
102	1	1	Control	F	15	01Control	37	0.9402	219.806	5.5	224.5	220.5	212.5	32.59	6	33.2225	0.980962	135
118	1	1	Control	F	16	01Control	38.5	0.861	220.582	5.45	226	221.5	213	31.595	6	33.2225	0.951012	136
134	1	1	Control	F	17	01Control	30.5	0.7989	218.506	5.15	223.5	219.5	211	24.43	6	33.2225	0.735345	137
150	1	1	Control	F	18	01Control	37	0.93305	222.186	4.6	226.5	223.5	215.5	30.615	6	33.2225	0.921514	138
166	1	1	Control	F	19	01Control	43.5	0.8341	221.164	4.55	225	222	214.5	34.015	6	33.2225	1.02385	139
198	1	1	Control	F	20	01Control	39.5	0.8985	223.868	3.5	227.5	226	217.5	33.695	6	33.2225	1.01422	140
214	1	1	Control	F	21	01Control	46.5	0.9071	219.739	3.15	223.5	220.5	214	39.155	6	33.2225	1.17857	141
230	1	1	Control	F	22	01Control	61	0.8894	223.602	1	225	225	219	52.595	6	33.2225	1.58311	142
246	1	1	Control	F	23	01Control	48	0.83315	218.611	1	220	220.5	213.5	38.085	6	33.2225	1.14636	143
262	1	1	Control	F	24	01Control	37.5	0.93265	218.865	2.8	222.5	222	210.5	32.265	6	33.2225	0.971179	144
7	1	1	Control	G	1	01Control	62	0.8439	223.391	-2.75	222	225	222	62.28	7	33.2225	1.87463	145
183	1	1	Control	G	2	01Control	27	0.7801	211.9	-0.55	211.5	213	209	32.515	7	33.2225	0.978704	146
279	1	1	Control	G	3	01Control	26	0.90555	212.282	0	212.5	213	210	29.135	7	33.2225	0.876966	147
295	1	1	Control	G	4	01Control	29.5	0.88635	212.335	1.15	213.5	213	209.5	33.87	7	33.2225	1.01949	148
311	1	1	Control	G	5	01Control	33.5	0.8999	214.706	0.55	216	215	211.5	33.445	7	33.2225	1.0067	149
327	1	1	Control	G	6	01Control	30	0.87765	214.51	1.7	216	214.5	211.5	30.385	7	33.2225	0.914591	150
343	1	1	Control	G	7	01Control	37.5	0.8408	218.673	1.9	220	219	215	35.295	7	33.2225	1.06238	151
359	1	1	Control	G	8	01Control	37	0.8918	216.545	2.7	219	217	212.5	34.82	7	33.2225	1.04808	152
375	1	1	Control	G	9	01Control	28.5	0.8387	214.468	4.2	218	215	208.5	26.955	7	33.2225	0.811348	153
23	1	1	Control	G	10	01Control	32.5	0.9233	218.871	4.5	223	219.5	212.5	29.16	7	33.2225	0.877718	154
39	1	1	Control	G	11	01Control	16	0.3846	109.333	1.7	111	109.5	106.5	12.43	7	33.2225	0.374144	155
55	1	1	Control	G	12	01Control	38	0.81015	218.918	4.35	222.5	219.5	213	30.77	7	33.2225	0.92618	156
71	1	1	Control	G	13	01Control	36	0.82645	217.74	5	222	218	212	31.47	7	33.2225	0.94725	157
87	1	1	Control	G	14	01Control	39	0.8242	221.261	3.8	225	222	215.5	34.365	7	33.2225	1.03439	158
103	1	1	Control	G	15	01Control	38	0.8712	217.506	5.1	222.5	218.5	210	35.365	7	33.2225	1.06449	159
119	1	1	Control	G	16	01Control	35.5	0.9174	217.07	4.9	221.5	218	210	30.73	7	33.2225	0.924976	160
135	1	1	Control	G	17	01Control	35	0.92145	219.503	4.45	223.5	220.5	213	30.335	7	33.2225	0.913086	161
151	1	1	Control	G	18	01Control	40	0.90925	220.313	3.75	224	221.5	214.5	35.135	7	33.2225	1.05757	162
167	1	1	Control	G	19	01Control	40.5	0.88235	219.578	4.5	223.5	220.5	212.5	33.78	7	33.2225	1.01678	163
199	1	1	Control	G	20	01Control	39.5	0.84975	218.34	3.45	221.5	219.5	213	35.79	7	33.2225	1.07728	164
215	1	1	Control	G	21	01Control	37	0.87515	219.653	1.7	222.5	221.5	214.5	32.74	7	33.2225	0.985477	165
231	1	1	Control	G	22	01Control	38	0.8881	216.12	0.8	217.5	217.5	212	34.04	7	33.2225	1.02461	166
247	1	1	Control	G	23	01Control	64	0.9524	227.441	-0.2	228.5	229.5	223	53.935	7	33.2225	1.62345	167
263	1	1	Control	G	24	01Control	27	0.83665	215.046	2.5	218.5	218	207	24.975	7	33.2225	0.75175	168
8	1	1	Control	H	1	01Control	33.5	0.91285	210.626	-1.1	210	211.5	209	35.23	8	33.2225	1.06043	169
184	1	1	Control	H	2	01Control	29.5	0.8148	212.122	-0.3	212	212.5	210	34.075	8	33.2225	1.02566	170
280	1	1	Control	H	3	01Control	27.5	0.74605	212.288	-0.1	212.5	212.5	211	30.69	8	33.2225	0.923772	171
296	1	1	Control	H	4	01Control	31	0.87085	211.735	0.55	212	211.5	210.5	35.985	8	33.2225	1.08315	172
312	1	1	Control	H	5	01Control	30.5	0.81555	213.346	0.6	214	213	212	31.52	8	33.2225	0.948755	173
328	1	1	Control	H	6	01Control	31	0.8387	214.5	1.25	215.5	214.5	212	33.1	8	33.2225	0.996313	174
344	1	1	Control	H	7	01Control	34	0.8333	217.046	1.45	218.5	217	214	32.845	8	33.2225	0.988637	175
360	1	1	Control	H	8	01Control	38.5	0.86275	216.096	1.95	218	216.5	212.5	36.015	8	33.2225	1.08405	176
376	1	1	Control	H	9	01Control	36	0.8492	219.057	3.15	221.5	220	214.5	33.665	8	33.2225	1.01332	177
24	1	1	Control	H	10	01Control	38	0.85145	216.493	3.75	219.5	216.5	212	35.47	8	33.2225	1.06765	178
40	1	1	Control	H	11	01Control	40	0.825	220.785	3.6	223.5	221.5	215	31.755	8	33.2225	0.955828	179
56	1	1	Control	H	12	01Control	37	0.81545	216.919	4.05	220	217	212	29.755	8	33.2225	0.895628	180
72	1	1	Control	H	13	01Control	40	0.9183	216.211	3.65	219.5	217	211	35.96	8	33.2225	1.0824	181
88	1	1	Control	H	14	01Control	36.5	0.89065	217.312	3.75	221	218	212	32.745	8	33.2225	0.985627	182
104	1	1	Control	H	15	01Control	22.5	0.7435	214.957	5.45	220.5	216	206.5	21.18	8	33.2225	0.63752	183
120	1	1	Control	H	16	01Control	36	0.9444	218.504	4.35	223	220	211.5	33.12	8	33.2225	0.996915	184
136	1	1	Control	H	17	01Control	38	0.89475	218.887	4.25	223.5	220	212.5	32.99	8	33.2225	0.993002	185
152	1	1	Control	H	18	01Control	31	0.85785	215.593	3.85	219.5	217	209	28.7	8	33.2225	0.863872	186
168	1	1	Control	H	19	01Control	36.5	0.84945	217.778	3.4	221	219	212.5	31.015	8	33.2225	0.933554	187
200	1	1	Control	H	20	01Control	39.5	0.84505	216.924	2.15	220	218	211.5	36.39	8	33.2225	1.09534	188
216	1	1	Control	H	21	01Control	57.5	0.92235	222.272	0.95	224	224	218	51.62	8	33.2225	1.55377	189
232	1	1	Control	H	22	01Control	32	0.8831	214.7	1.75	216.5	216	210	29.865	8	33.2225	0.898939	190
248	1	1	Control	H	23	01Control	26.5	0.74425	214.438	0.15	215.5	216	211	22.91	8	33.2225	0.689593	191
264	1	1	Control	H	24	01Control	22	0.825	211.351	0.1	212	214	207.5	20.455	8	33.2225	0.615697	192
9	1	1	Control	I	1	01Control	25	0.86525	207.698	-1.4	207	209	206	30.73	9	33.2225	0.924976	193
185	1	1	Control	I	2	01Control	25.5	0.81855	216.127	-0.1	216	217.5	214	35.93	9	33.2225	1.0815	194
281	1	1	Control	I	3	01Control	21	0.79365	207.057	-0.4	206.5	207	207	28.21	9	33.2225	0.849123	195
297	1	1	Control	I	4	01Control	27.5	0.89075	210.054	0.2	209.5	210	209	38.085	9	33.2225	1.14636	196
313	1	1	Control	I	5	01Control	15.5	0.80395	207.071	1.3	208.5	207	204.5	18.935	9	33.2225	0.569945	197
329	1	1	Control	I	6	01Control	27	0.8369	209.805	0.85	210.5	210	207.5	31.575	9	33.2225	0.95041	198
345	1	1	Control	I	7	01Control	37.5	0.83995	216.243	1.35	217	216	213.5	42.23	9	33.2225	1.27113	199
361	1	1	Control	I	8	01Control	33.5	0.86545	215.596	2.45	217.5	215.5	212.5	39.29	9	33.2225	1.18263	200
377	1	1	Control	I	9	01Control	44	0.8863	217.338	2.35	219	217	214.5	50.99	9	33.2225	1.5348	201
25	1	1	Control	I	10	01Control	37	0.83555	221.563	3.2	224.5	221.5	217	41.405	9	33.2225	1.24629	202
41	1	1	Control	I	11	01Control	35	0.9132	217.585	3.05	220	217.5	214	32.82	9	33.2225	0.987885	203
57	1	1	Control	I	12	01Control	30.5	0.8199	219.987	2.6	222	220	216.5	30.425	9	33.2225	0.915795	204
73	1	1	Control	I	13	01Control	37.5	0.95715	215.037	3.5	217.5	215	211	39.765	9	33.2225	1.19693	205
89	1	1	Control	I	14	01Control	31.5	0.82645	213.918	4.2	217	214.5	209	33.905	9	33.2225	1.02054	206
105	1	1	Control	I	15	01Control	17.5	0.8139	209.773	4.25	213.5	210.5	203.5	19.915	9	33.2225	0.599443	207
121	1	1	Control	I	16	01Control	37	0.90835	220.988	3.45	224.5	222	215	39.45	9	33.2225	1.18745	208
137	1	1	Control	I	17	01Control	30.5	0.91705	217.339	3.75	220.5	218	211.5	31.975	9	33.2225	0.96245	209
153	1	1	Control	I	18	01Control	27	0.8519	221.617	2	223	222	217.5	30.105	9	33.2225	0.906163	210
169	1	1	Control	I	19	01Control	52.5	0.87525	221.166	2.05	223	222	217	54.36	9	33.2225	1.63624	211
201	1	1	Control	I	20	01Control	27	0.7596	210.648	2.65	213	211.5	206	29.35	9	33.2225	0.883437	212
217	1	1	Control	I	21	01Control	32	0.8914	223.111	0.55	223.5	224	220.5	34.675	9	33.2225	1.04372	213
233	1	1	Control	I	22	01Control	23	0.7826	217.344	-1.6	216	217.5	216.5	24.87	9	33.2225	0.748589	214
249	1	1	Control	I	23	01Control	12	0.76785	210.431	-1.05	209.5	210.5	209.5	12.4	9	33.2225	0.373241	215
265	1	1	Control	I	24	01Control	24	0.9302	219.658	-2.2	219	221	218	28.35	9	33.2225	0.853337	216
10	1	1	Control	J	1	01Control	26.5	0.8269	208.245	-1.3	207	209	207	34.045	10	33.2225	1.02476	217
186	1	1	Control	J	2	01Control	26.5	0.79275	210.42	-0.55	210	210	210.5	35.19	10	33.2225	1.05922	218
282	1	1	Control	J	3	01Control	34	0.83395	210.06	-1.8	208.5	210	210.5	43.845	10	33.2225	1.31974	219
298	1	1	Control	J	4	01Control	24	0.7505	208.174	-0.35	207	208	207.5	32.29	10	33.2225	0.971932	220
314	1	1	Control	J	5	01Control	25.5	0.7254	209.705	-0.25	208.5	208.5	210.5	30.01	10	33.2225	0.903303	221
330	1	1	Control	J	6	01Control	26	0.8409	212.633	0.15	212.5	212	212	30.74	10	33.2225	0.925277	222
346	1	1	Control	J	7	01Control	41	0.86565	213.872	1.3	214	213	212.5	46.715	10	33.2225	1.40613	223
362	1	1	Control	J	8	01Control	33	0.8431	214.962	1.5	216	214	214	36.37	10	33.2225	1.09474	224
378	1	1	Control	J	9	01Control	33	0.77095	214.485	2.1	216	214.5	212	37.585	10	33.2225	1.13131	225
26	1	1	Control	J	10	01Control	25	0.8518	214.081	3.3	216	213	211.5	26.595	10	33.2225	0.800512	226
42	1	1	Control	J	11	01Control	28.5	0.86445	221.53	1.7	223	221.5	218.5	26.3	10	33.2225	0.791632	227
58	1	1	Control	J	12	01Control	31.5	0.86605	214.11	3.6	217.5	214.5	210	30.105	10	33.2225	0.906163	228
74	1	1	Control	J	13	01Control	29	0.9267	213.289	2.85	216	213.5	209.5	30.37	10	33.2225	0.91414	229
90	1	1	Control	J	14	01Control	35.5	0.9444	213.379	4	217	213.5	209	36.865	10	33.2225	1.10964	230
106	1	1	Control	J	15	01Control	31.5	0.86275	219.004	3.55	221.5	218.5	215	34.44	10	33.2225	1.03665	231
122	1	1	Control	J	16	01Control	28.5	0.87565	215.049	4.45	218.5	214.5	210	29.16	10	33.2225	0.877718	232
138	1	1	Control	J	17	01Control	33	0.9109	216.696	3.65	219	216	213	32.675	10	33.2225	0.98352	233
154	1	1	Control	J	18	01Control	34.5	0.8928	216.033	2.9	218	216.5	212	35.75	10	33.2225	1.07608	234
170	1	1	Control	J	19	01Control	49	0.82775	218.99	1.45	220.5	219.5	216	48.1	10	33.2225	1.44781	235
202	1	1	Control	J	20	01Control	25.5	0.8858	216.826	1.8	217.5	217.5	213	26.66	10	33.2225	0.802468	236
218	1	1	Control	J	21	01Control	38.5	0.88345	221.103	-0.6	220.5	221.5	220	40.565	10	33.2225	1.22101	237
234	1	1	Control	J	22	01Control	23	0.76	209.755	-0.5	209.5	210.5	208	24.71	10	33.2225	0.743773	238
250	1	1	Control	J	23	01Control	28	0.80015	216.302	-1.65	215.5	217.5	215	28.16	10	33.2225	0.847618	239
266	1	1	Control	J	24	01Control	16	0.78675	208.904	1.15	210	210	205.5	17.045	10	33.2225	0.513056	240
11	1	1	Control	K	1	01Control	24.5	0.8357	204.036	-2.3	201	203.5	206.5	33.315	11	33.2225	1.00278	241
187	1	1	Control	K	2	01Control	19.5	0.76635	203.885	-1.7	202	204	204.5	30.13	11	33.2225	0.906915	242
283	1	1	Control	K	3	01Control	19	0.79285	204.49	-1.8	202	203.5	206.5	26.51	11	33.2225	0.797953	243
299	1	1	Control	K	4	01Control	20.5	0.75475	208.586	-0.9	207	207.5	209.5	30.16	11	33.2225	0.907818	244
315	1	1	Control	K	5	01Control	20	0.7889	206.333	-0.65	205	205.5	207.5	26.945	11	33.2225	0.811047	245
331	1	1	Control	K	6	01Control	31.5	0.86025	211.894	-0.7	210.5	211.5	212.5	41.595	11	33.2225	1.25201	246
347	1	1	Control	K	7	01Control	22.5	0.91105	208.368	1.1	208.5	206.5	208.5	27.61	11	33.2225	0.831063	247
363	1	1	Control	K	8	01Control	31.5	0.872	211.804	0.95	212	211	211.5	38.085	11	33.2225	1.14636	248
379	1	1	Control	K	9	01Control	34	0.8284	213.117	1.6	214	212.5	212	39.09	11	33.2225	1.17661	249
27	1	1	Control	K	10	01Control	36	0.83555	213.189	2.2	214	212	211.5	42.07	11	33.2225	1.26631	250
43	1	1	Control	K	11	01Control	34	0.92855	213.989	2.55	216	213.5	210.5	34.345	11	33.2225	1.03379	251
59	1	1	Control	K	12	01Control	37.5	0.92405	214.155	2.25	216	214	211	36.9	11	33.2225	1.11069	252
75	1	1	Control	K	13	01Control	21.5	0.8297	207.237	2.2	209	207.5	204.5	23.905	11	33.2225	0.719542	253
91	1	1	Control	K	14	01Control	28	0.88675	213.722	2.45	215	213.5	211.5	31.995	11	33.2225	0.963052	254
107	1	1	Control	K	15	01Control	1	0.25	95.75	1.5	98	97.5	91.5	1.285	11	33.2225	0.0386786	255
123	1	1	Control	K	16	01Control	32	0.9375	212.546	2.65	215	212	209.5	38.195	11	33.2225	1.14967	256
139	1	1	Control	K	17	01Control	17.5	0.44445	105.31	1.35	106.5	105.5	103.5	17.68	11	33.2225	0.532169	257
155	1	1	Control	K	18	01Control	32	0.8788	212.251	2.15	213.5	212.5	209.5	36.45	11	33.2225	1.09715	258
171	1	1	Control	K	19	01Control	41.5	0.85905	215.45	-0.4	214.5	214.5	215	45.225	11	33.2225	1.36128	259
203	1	1	Control	K	20	01Control	37.5	0.8578	214.289	0.4	214.5	214	212.5	43.61	11	33.2225	1.31266	260
219	1	1	Control	K	21	01Control	19	0.8377	207.101	0.25	207.5	208	204.5	22.85	11	33.2225	0.687787	261
235	1	1	Control	K	22	01Control	31	0.8625	212.339	-1.35	211	213	211.5	35.405	11	33.2225	1.06569	262
251	1	1	Control	K	23	01Control	21.5	0.78785	212.216	-1.5	210.5	212	212.5	25.155	11	33.2225	0.757168	263
267	1	1	Control	K	24	01Control	37.5	0.83615	212.775	-1.95	211.5	214	212	43.32	11	33.2225	1.30394	264
12	1	1	Control	L	1	01Control	26.5	0.83655	207.599	-2.65	205	207	210	35.225	12	33.2225	1.06028	265
188	1	1	Control	L	2	01Control	24	0.79705	205.138	-1.3	202	204.5	207.5	33.495	12	33.2225	1.0082	266
284	1	1	Control	L	3	01Control	24.5	0.8575	207.511	-2.8	203.5	205.5	211.5	33.07	12	33.2225	0.99541	267
300	1	1	Control	L	4	01Control	21.5	0.89445	204.747	-1.3	202.5	203.5	206	29.82	12	33.2225	0.897584	268
316	1	1	Control	L	5	01Control	18	0.9737	203.62	-1.1	201.5	201.5	207	22.425	12	33.2225	0.674994	269
332	1	1	Control	L	6	01Control	26.5	0.7857	210.089	-0.9	208	208	212.5	32.64	12	33.2225	0.982467	270
348	1	1	Control	L	7	01Control	23	0.8372	206.921	-0.45	205	205	209	27.085	12	33.2225	0.815261	271
364	1	1	Control	L	8	01Control	26	0.84595	212.262	-0.7	210.5	210	214	29.625	12	33.2225	0.891715	272
380	1	1	Control	L	9	01Control	29	0.82735	208.365	0.95	208	206.5	209	33.48	12	33.2225	1.00775	273
28	1	1	Control	L	10	01Control	33	0.87255	215.378	1.35	216	214.5	214.5	36.34	12	33.2225	1.09384	274
44	1	1	Control	L	11	01Control	39.5	0.8847	218.816	1.05	220	219	215.5	37.185	12	33.2225	1.11927	275
60	1	1	Control	L	12	01Control	32.5	0.86365	211.65	1.7	212.5	211	211	32.265	12	33.2225	0.971179	276
76	1	1	Control	L	13	01Control	34	0.8923	211.796	1.9	213	211.5	209.5	36.42	12	33.2225	1.09625	277
92	1	1	Control	L	14	01Control	28.5	0.8593	210.371	0.65	211	209	209	30.615	12	33.2225	0.921514	278
108	1	1	Control	L	15	01Control	30	0.8838	209.764	2.1	211	209	208	34.1	12	33.2225	1.02641	279
124	1	1	Control	L	16	01Control	0	0	0	0	0	0	0	0	12	33.2225	0	280
140	1	1	Control	L	17	01Control	30	0.88385	211.68	1.85	212.5	211	211	32.15	12	33.2225	0.967718	281
156	1	1	Control	L	18	01Control	11.5	0.7692	200.426	2.45	202	200	198	12.31	12	33.2225	0.370532	282
172	1	1	Control	L	19	01Control	44	0.82305	214.76	-0.25	214	214	215	44.74	12	33.2225	1.34668	283
204	1	1	Control	L	20	01Control	0	0	0	0	0	0	0	0	12	33.2225	0	284
220	1	1	Control	L	21	01Control	30.5	0.8513	209.179	-0.95	208	209	209.5	32.915	12	33.2225	0.990744	285
236	1	1	Control	L	22	01Control	0.5	0.25	93	2.3	96.5	93	89.5	0.54	12	33.2225	0.016254	286
252	1	1	Control	L	23	01Control	39.5	0.842	209.339	-3.7	206	209	212	40.82	12	33.2225	1.22869	287
268	1	1	Control	L	24	01Control	35.5	0.86115	213.549	-3.9	211.5	215	213	40.045	12	33.2225	1.20536	288
13	1	1	Control	M	1	01Control	19	0.80415	205.157	-2.2	202.5	204	206.5	27.56	13	33.2225	0.829558	289
189	1	1	Control	M	2	01Control	23.5	0.80495	206.673	-2.8	203	205	209.5	35.845	13	33.2225	1.07894	290
285	1	1	Control	M	3	01Control	41.5	0.8581	212.379	-3.7	207.5	210.5	217.5	62.7	13	33.2225	1.88728	291
301	1	1	Control	M	4	01Control	14	0.7348	203.006	-2.25	200	201	207	21.855	13	33.2225	0.657837	292
317	1	1	Control	M	5	01Control	23	0.71955	203.212	-1.1	201	200.5	206.5	32.645	13	33.2225	0.982617	293
333	1	1	Control	M	6	01Control	20.5	0.80475	205.211	-1.9	201.5	203	211	28.67	13	33.2225	0.862969	294
349	1	1	Control	M	7	01Control	22	0.88675	206.132	-0.95	204	203.5	209	28.345	13	33.2225	0.853187	295
365	1	1	Control	M	8	01Control	35.5	0.8778	208.978	-0.85	206.5	207	211.5	45.235	13	33.2225	1.36158	296
381	1	1	Control	M	9	01Control	29	0.87685	206.609	0.35	205.5	205	209	36.945	13	33.2225	1.11205	297
29	1	1	Control	M	10	01Control	26	0.8274	207.87	0.55	206.5	206	209.5	31.905	13	33.2225	0.960343	298
45	1	1	Control	M	11	01Control	53.5	0.86905	214.699	-0.75	212.5	212	218.5	56.685	13	33.2225	1.70622	299
61	1	1	Control	M	12	01Control	30	0.8	209.917	0.15	209.5	209	211	33.34	13	33.2225	1.00354	300
77	1	1	Control	M	13	01Control	27	0.86445	212.69	0.65	212	211.5	213.5	32.49	13	33.2225	0.977952	301
93	1	1	Control	M	14	01Control	25	0.8638	209.853	0.9	209	209	209	30.005	13	33.2225	0.903153	302
109	1	1	Control	M	15	01Control	26	0.9231	208.307	1.45	208	207	208.5	33.2	13	33.2225	0.999323	303
125	1	1	Control	M	16	01Control	27	0.86525	210.584	1.05	210	209	210	32.09	13	33.2225	0.965912	304
141	1	1	Control	M	17	01Control	25.5	0.8623	210.123	0.65	209.5	209	210	29.965	13	33.2225	0.901949	305
157	1	1	Control	M	18	01Control	27.5	0.8065	210.896	-0.4	210.5	209.5	210.5	32.945	13	33.2225	0.991647	306
173	1	1	Control	M	19	01Control	26.5	0.853	208.066	-0.65	206.5	206.5	209.5	30.01	13	33.2225	0.903303	307
205	1	1	Control	M	20	01Control	31.5	0.90385	209.749	-1.8	207.5	208.5	212	38.925	13	33.2225	1.17165	308
221	1	1	Control	M	21	01Control	18.5	0.86605	204.898	-2.45	201.5	204	208	22.52	13	33.2225	0.677854	309
237	1	1	Control	M	22	01Control	31.5	0.8095	209.537	-2.75	205.5	208.5	212	39.985	13	33.2225	1.20355	310
253	1	1	Control	M	23	01Control	26	0.77885	210.293	-3.75	207	210	212.5	30.13	13	33.2225	0.906915	311
269	1	1	Control	M	24	01Control	36.5	0.90955	210.385	-3.3	208.5	211	210	45.65	13	33.2225	1.37407	312
14	1	1	Control	N	1	01Control	12	0.75	195.597	-2.1	194	194	199.5	16.9	14	33.2225	0.508691	313
190	1	1	Control	N	2	01Control	17.5	0.86535	200.772	-2.4	197.5	199	204	27.71	14	33.2225	0.834073	314
286	1	1	Control	N	3	01Control	22.5	0.753	204.349	-3.25	199.5	202	211	37.41	14	33.2225	1.12604	315
302	1	1	Control	N	4	01Control	20.5	0.80305	202.891	-1.55	199.5	200.5	207.5	34.105	14	33.2225	1.02656	316
318	1	1	Control	N	5	01Control	28	0.74175	206.171	-1.95	202.5	203.5	211	42.045	14	33.2225	1.26556	317
334	1	1	Control	N	6	01Control	18	0.9274	206.065	-2.1	202.5	203	210.5	26.55	14	33.2225	0.799157	318
350	1	1	Control	N	7	01Control	22	0.77865	203.523	-0.95	201	200.5	208	30.715	14	33.2225	0.924524	319
366	1	1	Control	N	8	01Control	24.5	0.7405	204.593	-0.55	202	201.5	208.5	33.355	14	33.2225	1.00399	320
382	1	1	Control	N	9	01Control	27.5	0.81765	205.998	-0.55	204.5	203	209.5	38.175	14	33.2225	1.14907	321
30	1	1	Control	N	10	01Control	27	0.81455	205.104	-0.2	203.5	202.5	208	35.65	14	33.2225	1.07307	322
46	1	1	Control	N	11	01Control	49.5	0.8601	212.546	-2.6	209	209.5	218	55.13	14	33.2225	1.65942	323
62	1	1	Control	N	12	01Control	22.5	0.798	208.439	-0.7	206	206	212	26.825	14	33.2225	0.807435	324
78	1	1	Control	N	13	01Control	14	0.73335	199.164	0.15	198.5	198	199	18.45	14	33.2225	0.555347	325
94	1	1	Control	N	14	01Control	30.5	0.88515	208.083	-0.25	207	206.5	208.5	39.055	14	33.2225	1.17556	326
110	1	1	Control	N	15	01Control	25.5	0.71035	208.463	-1.05	206.5	205.5	211.5	35.56	14	33.2225	1.07036	327
126	1	1	Control	N	16	01Control	34	0.8369	210.608	-1.15	208	209	213	43.195	14	33.2225	1.30017	328
142	1	1	Control	N	17	01Control	29.5	0.7889	209.652	-0.85	207.5	207	212.5	37.285	14	33.2225	1.12228	329
158	1	1	Control	N	18	01Control	19	0.8235	205.534	-1.65	203	203.5	208.5	24.295	14	33.2225	0.731282	330
174	1	1	Control	N	19	01Control	26.5	0.836	207.946	-2.05	205.5	206.5	211	32.1	14	33.2225	0.966213	331
206	1	1	Control	N	20	01Control	20.5	0.73215	206.511	-2	204.5	205.5	208.5	27.215	14	33.2225	0.819174	332
222	1	1	Control	N	21	01Control	23.5	0.8518	206.793	-3.75	203	205.5	210.5	31.64	14	33.2225	0.952367	333
238	1	1	Control	N	22	01Control	23.5	0.75495	209.293	-4.35	205	208	214	30.305	14	33.2225	0.912183	334
254	1	1	Control	N	23	01Control	26	0.7984	207.67	-5.7	202	206	212	32.59	14	33.2225	0.980962	335
270	1	1	Control	N	24	01Control	30.5	0.8477	211.198	-5.25	206.5	211	214.5	43.295	14	33.2225	1.30318	336
15	1	1	Control	O	1	01Control	25	0.7671	204.247	-3.75	200	203	208	38.655	15	33.2225	1.16352	337
191	1	1	Control	O	2	01Control	30	0.8633	203.694	-4.25	199	201.5	210	51.07	15	33.2225	1.53721	338
287	1	1	Control	O	3	01Control	14.5	0.75	204.167	-2.9	200	202	209.5	24.65	15	33.2225	0.741967	339
303	1	1	Control	O	4	01Control	29	0.836	208.151	-5.45	200.5	203.5	219	50.48	15	33.2225	1.51945	340
319	1	1	Control	O	5	01Control	14	0.7857	201.07	-2.05	197	197.5	207	21.555	15	33.2225	0.648807	341
335	1	1	Control	O	6	01Control	35.5	0.8589	207.151	-2.45	204	205	212	54.47	15	33.2225	1.63955	342
351	1	1	Control	O	7	01Control	19.5	0.78	201.911	-1.45	198.5	198	207.5	28.06	15	33.2225	0.844608	343
367	1	1	Control	O	8	01Control	31.5	0.83365	203.142	-1.55	200	200	208	44.48	15	33.2225	1.33885	344
383	1	1	Control	O	9	01Control	21	0.9	211.542	-0.95	208.5	208.5	216	30.045	15	33.2225	0.904357	345
31	1	1	Control	O	10	01Control	24	0.7906	207.056	-1.4	204.5	204.5	211.5	32.875	15	33.2225	0.98954	346
47	1	1	Control	O	11	01Control	27.5	0.8205	205.908	-0.95	203.5	203.5	209	32.41	15	33.2225	0.975544	347
63	1	1	Control	O	12	01Control	33.5	0.88015	211.132	-0.5	208.5	208.5	214.5	41.185	15	33.2225	1.23967	348
79	1	1	Control	O	13	01Control	26.5	0.8027	208.519	-1.1	207	206.5	211	35.365	15	33.2225	1.06449	349
95	1	1	Control	O	14	01Control	15.5	0.8095	200.651	-0.05	199	197.5	204	20.695	15	33.2225	0.622921	350
111	1	1	Control	O	15	01Control	19.5	0.7684	204.729	0.55	203.5	202	208	27.53	15	33.2225	0.828655	351
127	1	1	Control	O	16	01Control	22	0.87455	204.424	-0.5	202.5	202	208.5	29.21	15	33.2225	0.879223	352
143	1	1	Control	O	17	01Control	43	0.9535	211.88	-2.15	209	210.5	215	55.935	15	33.2225	1.68365	353
159	1	1	Control	O	18	01Control	26.5	0.8673	207.783	-3.5	203.5	205.5	214	35.34	15	33.2225	1.06374	354
175	1	1	Control	O	19	01Control	22	0.8968	206.806	-2.6	203.5	205	210.5	27.79	15	33.2225	0.836481	355
207	1	1	Control	O	20	01Control	14	0.75	203.672	-1.8	201	202	207	19.25	15	33.2225	0.579427	356
223	1	1	Control	O	21	01Control	24.5	0.74455	207.773	-4.15	203.5	206.5	212	33.225	15	33.2225	1.00008	357
239	1	1	Control	O	22	01Control	23	0.7567	204.495	-3.3	199.5	201.5	210.5	33	15	33.2225	0.993303	358
255	1	1	Control	O	23	01Control	29.5	0.83315	207.147	-5.75	201.5	206	213.5	38.065	15	33.2225	1.14576	359
271	1	1	Control	O	24	01Control	23.5	0.7159	206.555	-5.95	201.5	206.5	210	32.175	15	33.2225	0.96847	360
16	1	1	Control	P	1	01Control	29	0.84415	203.002	-1.25	201.5	203	204.5	42.005	16	33.2225	1.26435	361
192	1	1	Control	P	2	01Control	20	0.825	200.705	0.45	200	199.5	202	33.265	16	33.2225	1.00128	362
288	1	1	Control	P	3	01Control	24.5	0.7714	203.558	-0.25	202.5	202	205	38.17	16	33.2225	1.14892	363
304	1	1	Control	P	4	01Control	24	0.8846	205.915	0.55	205	204.5	207.5	39.2	16	33.2225	1.17992	364
320	1	1	Control	P	5	01Control	25.5	0.8118	204.295	0.95	203.5	202.5	205	35.995	16	33.2225	1.08345	365
336	1	1	Control	P	6	01Control	24.5	0.80555	203.312	0.55	202	201	206	35.225	16	33.2225	1.06028	366
352	1	1	Control	P	7	01Control	21	0.7082	202.893	1.6	203	200.5	203	27.29	16	33.2225	0.821431	367
368	1	1	Control	P	8	01Control	16	0.75595	199.262	3.55	201	197.5	197	20.105	16	33.2225	0.605162	368
384	1	1	Control	P	9	01Control	1	0.25	96.75	4.4	100	96	92.5	1.265	16	33.2225	0.0380766	369
32	1	1	Control	P	10	01Control	23	0.80495	205.188	2.1	206	203.5	204	29.79	16	33.2225	0.896681	370
48	1	1	Control	P	11	01Control	20	0.8095	203.885	2.9	206	203	200.5	21.865	16	33.2225	0.658138	371
64	1	1	Control	P	12	01Control	35.5	0.8772	209.934	1.55	210	208.5	210.5	39.47	16	33.2225	1.18805	372
80	1	1	Control	P	13	01Control	21.5	0.8451	211.69	3.25	213	209.5	212	26.395	16	33.2225	0.794492	373
96	1	1	Control	P	14	01Control	30	0.8466	207.025	2	208	206.5	205.5	36.95	16	33.2225	1.1122	374
112	1	1	Control	P	15	01Control	41	0.8287	209.693	1.4	209.5	208	210.5	53.735	16	33.2225	1.61743	375
128	1	1	Control	P	16	01Control	24	0.9078	202.692	3.1	205	201.5	201.5	28.275	16	33.2225	0.85108	376
144	1	1	Control	P	17	01Control	28.5	0.82425	207.654	2.2	207.5	206	207.5	33.755	16	33.2225	1.01603	377
160	1	1	Control	P	18	01Control	28.5	0.81215	207.374	1.15	207	206.5	205.5	35.275	16	33.2225	1.06178	378
176	1	1	Control	P	19	01Control	19.5	0.75375	202.91	1.05	202.5	202	202.5	22.98	16	33.2225	0.6917	379
208	1	1	Control	P	20	01Control	35	0.8458	208.34	-0.9	207	207.5	209	45.115	16	33.2225	1.35797	380
224	1	1	Control	P	21	01Control	46	0.84475	206.742	0.15	205	205.5	206.5	58.08	16	33.2225	1.74821	381
240	1	1	Control	P	22	01Control	19	0.85	201.838	0	200	202	200	24.595	16	33.2225	0.740312	382
256	1	1	Control	P	23	01Control	24	0.82735	202.201	1	202.5	202.5	200.5	28.665	16	33.2225	0.862819	383
272	1	1	Control	P	24	01Control	21.5	0.83805	207.155	-2.25	203.5	207	207.5	25.995	16	33.2225	0.782452	384

## Sheet: Plate_SC
	Run	Plate	Type	Row	Col	PlateNames	Size	Circularity	Brightness	Redness	AvgRed	AvgGreen	AvgBlue	NSize	RowNumeric	MEAN WT	STRAIN/WT RATIO	Index obs in the graph
1	1	1	Control	A	1	01Control	51.5	0.8682	236.171	-14.4	223.5	236.5	245	31.985	1	39.3513	0.812808	1
177	1	1	Control	A	2	01Control	58	0.9483	230.718	-16.3	216	230	245.5	40.27	1	39.3513	1.02335	2
273	1	1	Control	A	3	01Control	51	0.907	233.386	-15.85	220	233.5	245.5	38.425	1	39.3513	0.976462	3
289	1	1	Control	A	4	01Control	50.5	0.83695	233.726	-14.85	220.5	233.5	247.5	36.075	1	39.3513	0.916743	4
305	1	1	Control	A	5	01Control	65.5	0.86825	234.534	-14	222	234.5	246.5	49.12	1	39.3513	1.24824	5
321	1	1	Control	A	6	01Control	56	0.8949	236.631	-13.55	225	236.5	247	42.415	1	39.3513	1.07786	6
337	1	1	Control	A	7	01Control	68	0.87415	238.617	-13.2	227.5	238.5	248	48.47	1	39.3513	1.23173	7
353	1	1	Control	A	8	01Control	50	0.8288	235.721	-13.35	223.5	235	248	35.52	1	39.3513	0.90264	8
369	1	1	Control	A	9	01Control	39.5	0.8439	234.954	-12.3	223.5	234	247	29.08	1	39.3513	0.738985	9
17	1	1	Control	A	10	01Control	48	0.8371	240.167	-11.05	230.5	240.5	248.5	35.11	1	39.3513	0.892221	10
33	1	1	Control	A	11	01Control	56	0.8858	235.644	-12.05	223.5	235	247	38.475	1	39.3513	0.977733	11
49	1	1	Control	A	12	01Control	66.5	0.90905	235.467	-11.85	224.5	235	246.5	45.145	1	39.3513	1.14723	12
65	1	1	Control	A	13	01Control	58.5	0.90835	237.962	-11	228	237	247.5	41.5	1	39.3513	1.0546	13
81	1	1	Control	A	14	01Control	60	0.914	236.431	-11.45	225.5	236	247.5	40.88	1	39.3513	1.03885	14
97	1	1	Control	A	15	01Control	56.5	0.95565	238.045	-12.75	227	238	247.5	39	1	39.3513	0.991074	15
113	1	1	Control	A	16	01Control	58.5	0.93205	238.144	-12.1	227	238	247.5	39.78	1	39.3513	1.0109	16
129	1	1	Control	A	17	01Control	55	0.9183	238.642	-12.75	227.5	238.5	247.5	37.57	1	39.3513	0.954735	17
145	1	1	Control	A	18	01Control	87.5	0.9371	239.053	-13.85	227	239	249.5	60.335	1	39.3513	1.53324	18
161	1	1	Control	A	19	01Control	52.5	0.88565	237.209	-15.05	224	237.5	247.5	34.4	1	39.3513	0.874178	19
193	1	1	Control	A	20	01Control	55	0.90905	237.463	-16	223.5	238	248.5	38.135	1	39.3513	0.969092	20
209	1	1	Control	A	21	01Control	59	0.8909	238.854	-15.9	226	239.5	250	39.425	1	39.3513	1.00187	21
225	1	1	Control	A	22	01Control	59.5	0.8548	236.43	-18.05	221	238	249	38.94	1	39.3513	0.989549	22
241	1	1	Control	A	23	01Control	60.5	0.8986	235.519	-18.25	220.5	236.5	248.5	38.495	1	39.3513	0.978241	23
257	1	1	Control	A	24	01Control	75.5	0.84235	239.68	-15.55	227.5	242	247	42.34	1	39.3513	1.07595	24
2	1	1	Control	B	1	01Control	52.5	0.8939	235.585	-11.45	226	236.5	244	36.245	2	39.3513	0.921063	25
178	1	1	Control	B	2	01Control	38.5	0.8896	232.799	-13	221.5	233	243	31.835	2	39.3513	0.808996	26
274	1	1	Control	B	3	01Control	38	0.8933	233.609	-12.6	222.5	234	244	34.425	2	39.3513	0.874813	27
290	1	1	Control	B	4	01Control	65	0.8952	235.33	-11.1	225	235	244.5	54.44	2	39.3513	1.38344	28
306	1	1	Control	B	5	01Control	44.5	0.8753	236.983	-10.7	228	237	246	38.015	2	39.3513	0.966043	29
322	1	1	Control	B	6	01Control	47	0.888	236.613	-10.65	227	235.5	244	40.26	2	39.3513	1.02309	30
338	1	1	Control	B	7	01Control	47	0.85845	238.379	-9.9	229.5	238	246.5	38.555	2	39.3513	0.979766	31
354	1	1	Control	B	8	01Control	50.5	0.816	241.243	-9.15	233	241	248	41.295	2	39.3513	1.04939	32
370	1	1	Control	B	9	01Control	33.5	0.86275	235.636	-9.15	226.5	235.5	244	28.42	2	39.3513	0.722213	33
18	1	1	Control	B	10	01Control	30.5	0.8524	235.345	-9.25	226	235	244	25.825	2	39.3513	0.656269	34
34	1	1	Control	B	11	01Control	51	0.84525	237.969	-8.55	230	237.5	244.5	40.3	2	39.3513	1.02411	35
50	1	1	Control	B	12	01Control	50.5	0.84675	236.589	-8.4	228.5	236	245	39.69	2	39.3513	1.00861	36
66	1	1	Control	B	13	01Control	63.5	0.9604	239.514	-7.75	232	239	245	52.695	2	39.3513	1.33909	37
82	1	1	Control	B	14	01Control	49	0.8776	238.799	-8.65	231	238	245	40.885	2	39.3513	1.03898	38
98	1	1	Control	B	15	01Control	47.5	0.89435	238.761	-9	230.5	238	246	39.01	2	39.3513	0.991328	39
114	1	1	Control	B	16	01Control	48.5	0.88	239.184	-9.55	231	239	246.5	37.94	2	39.3513	0.964137	40
130	1	1	Control	B	17	01Control	39.5	0.90695	237.64	-10.6	228.5	237	245.5	31.35	2	39.3513	0.796671	41
146	1	1	Control	B	18	01Control	49	0.86	238.275	-11.4	228.5	238.5	246.5	39.38	2	39.3513	1.00073	42
162	1	1	Control	B	19	01Control	49.5	0.8431	240.468	-11.4	230.5	241	248	37.61	2	39.3513	0.955751	43
194	1	1	Control	B	20	01Control	48.5	0.86405	236.831	-13.45	225.5	237	246	39.19	2	39.3513	0.995902	44
210	1	1	Control	B	21	01Control	55.5	0.86175	239.198	-13.9	228	240	248	42.425	2	39.3513	1.07811	45
226	1	1	Control	B	22	01Control	52	0.83655	237.351	-15.25	224.5	239	247.5	39.585	2	39.3513	1.00594	46
242	1	1	Control	B	23	01Control	55	0.85835	236.131	-14.65	224.5	238	245	40.64	2	39.3513	1.03275	47
258	1	1	Control	B	24	01Control	59.5	0.8752	239.366	-11.9	230	241	246	38.755	2	39.3513	0.984848	48
3	1	1	Control	C	1	01Control	50.5	0.8705	227.641	-17.8	211	226.5	243.5	36.63	3	39.3513	0.930847	49
179	1	1	Control	C	2	01Control	44.5	0.9012	226.191	-17.95	210.5	225.5	241	37.97	3	39.3513	0.964899	50
275	1	1	Control	C	3	01Control	42.5	0.9294	225.478	-17.25	209.5	224.5	240.5	38.61	3	39.3513	0.981163	51
291	1	1	Control	C	4	01Control	33.5	0.8125	230.642	-15.2	218	230.5	242	28.79	3	39.3513	0.731616	52
307	1	1	Control	C	5	01Control	59.5	0.9408	230.754	-14.45	217.5	230.5	242	53.21	3	39.3513	1.35218	53
323	1	1	Control	C	6	01Control	50	0.85	231.708	-15.15	219	231	244.5	45.21	3	39.3513	1.14888	54
339	1	1	Control	C	7	01Control	47.5	0.84265	228.278	-13.65	215	226.5	242	40.05	3	39.3513	1.01776	55
355	1	1	Control	C	8	01Control	19.5	0.72665	229.563	-14.95	215	227.5	242.5	16.365	3	39.3513	0.41587	56
371	1	1	Control	C	9	01Control	43	0.85435	233.712	-12.5	223	233	244	38.14	3	39.3513	0.96922	57
19	1	1	Control	C	10	01Control	46	0.8913	232.483	-12.55	220.5	231	245	40.185	3	39.3513	1.02119	58
35	1	1	Control	C	11	01Control	45	0.8585	234.92	-12.5	223.5	233.5	246	36.81	3	39.3513	0.935421	59
51	1	1	Control	C	12	01Control	60.5	0.95845	235.405	-11.6	225	235	244.5	49.055	3	39.3513	1.24659	60
67	1	1	Control	C	13	01Control	45	0.94465	234.713	-12	223.5	233.5	246	38.475	3	39.3513	0.977733	61
83	1	1	Control	C	14	01Control	47	0.9149	237.557	-11.75	226.5	237	247.5	38.855	3	39.3513	0.987389	62
99	1	1	Control	C	15	01Control	41	0.9289	235.598	-12.05	225	234.5	245.5	34.42	3	39.3513	0.874686	63
115	1	1	Control	C	16	01Control	46.5	0.89625	234.93	-13	223	234.5	246	37.355	3	39.3513	0.949271	64
131	1	1	Control	C	17	01Control	45.5	0.893	236.188	-13.85	224	236	247	37.21	3	39.3513	0.945586	65
147	1	1	Control	C	18	01Control	46	0.8307	235.493	-14.25	222.5	235	247	38.215	3	39.3513	0.971125	66
163	1	1	Control	C	19	01Control	67	0.85505	233.493	-16.65	219.5	233	246.5	52.58	3	39.3513	1.33617	67
195	1	1	Control	C	20	01Control	46.5	0.87155	232.737	-15.1	220	232.5	245	38.36	3	39.3513	0.97481	68
211	1	1	Control	C	21	01Control	48.5	0.84375	234.091	-16.6	220	235	246.5	38.99	3	39.3513	0.99082	69
227	1	1	Control	C	22	01Control	56	0.95535	231.8	-17.65	217	232.5	244.5	43.905	3	39.3513	1.11572	70
243	1	1	Control	C	23	01Control	37	0.81665	224.951	-20.25	209	226	239	28.145	3	39.3513	0.715225	71
259	1	1	Control	C	24	01Control	60.5	0.87725	235.848	-17.45	221.5	237	247.5	40.675	3	39.3513	1.03364	72
4	1	1	Control	D	1	01Control	47	0.8391	230.556	-15.65	217	231	242.5	36.82	4	39.3513	0.935675	73
180	1	1	Control	D	2	01Control	46	0.8644	226.326	-15.7	212	226	239.5	40.415	4	39.3513	1.02703	74
276	1	1	Control	D	3	01Control	41.5	0.92915	226.25	-14.3	214	226.5	238.5	39.18	4	39.3513	0.995648	75
292	1	1	Control	D	4	01Control	44	0.88235	228.726	-14.6	215.5	227.5	242	39.795	4	39.3513	1.01128	76
308	1	1	Control	D	5	01Control	34	0.9403	229.1	-14.6	216	228	243.5	32.375	4	39.3513	0.822718	77
324	1	1	Control	D	6	01Control	38.5	0.83355	229.287	-12.55	218	228.5	239.5	36.365	4	39.3513	0.924113	78
340	1	1	Control	D	7	01Control	42.5	0.81155	233.635	-11	222.5	232	244.5	37.535	4	39.3513	0.953845	79
356	1	1	Control	D	8	01Control	52.5	0.8453	231.158	-10.75	220.5	229	242.5	47.355	4	39.3513	1.20339	80
372	1	1	Control	D	9	01Control	45.5	0.8649	235.304	-10.2	226	235	243.5	42.45	4	39.3513	1.07875	81
20	1	1	Control	D	10	01Control	43.5	0.82715	235.109	-10.5	225.5	234	244	39.52	4	39.3513	1.00429	82
36	1	1	Control	D	11	01Control	43	0.9064	233.753	-10.4	224	232.5	243.5	36.735	4	39.3513	0.933515	83
52	1	1	Control	D	12	01Control	44	0.8409	235.742	-10.6	226	234.5	245	38.36	4	39.3513	0.97481	84
68	1	1	Control	D	13	01Control	31.5	0.872	232.376	-10.95	222.5	231	242	28.495	4	39.3513	0.724119	85
84	1	1	Control	D	14	01Control	45.5	0.8688	235.337	-10.4	225.5	234.5	244.5	40.26	4	39.3513	1.02309	86
100	1	1	Control	D	15	01Control	44.5	0.8567	236.766	-10.55	227	235.5	246	39.14	4	39.3513	0.994632	87
116	1	1	Control	D	16	01Control	44.5	0.8202	236.801	-11.5	226.5	236.5	246	37.56	4	39.3513	0.95448	88
132	1	1	Control	D	17	01Control	45.5	0.79775	236.634	-11.05	226.5	236	246	39.345	4	39.3513	0.999841	89
148	1	1	Control	D	18	01Control	42.5	0.80385	235.527	-12.1	225	235.5	244.5	37.04	4	39.3513	0.941266	90
164	1	1	Control	D	19	01Control	51.5	0.8154	234.353	-12.45	223.5	234.5	243.5	43.46	4	39.3513	1.10441	91
196	1	1	Control	D	20	01Control	44	0.7727	236.808	-13.7	225	236.5	247.5	39.24	4	39.3513	0.997173	92
212	1	1	Control	D	21	01Control	19.5	0.8125	231.843	-14.7	219	232	243	16.645	4	39.3513	0.422985	93
228	1	1	Control	D	22	01Control	53	0.9151	231.134	-14.7	219.5	232	240.5	44.26	4	39.3513	1.12474	94
244	1	1	Control	D	23	01Control	50	0.9	232.705	-16.6	218.5	234	244	40.265	4	39.3513	1.02322	95
260	1	1	Control	D	24	01Control	55	0.922	233.982	-16.2	221.5	235.5	244	38.81	4	39.3513	0.986246	96
5	1	1	Control	E	1	01Control	56.5	0.9114	225.091	-16.2	211.5	226	236.5	46.64	5	39.3513	1.18522	97
181	1	1	Control	E	2	01Control	43	0.8723	222.709	-17	207.5	221.5	238	41.35	5	39.3513	1.05079	98
277	1	1	Control	E	3	01Control	48.5	0.8758	222.473	-16.55	208	221	237	49.005	5	39.3513	1.24532	99
293	1	1	Control	E	4	01Control	18	0.89475	227.697	-17.25	212.5	226.5	242	17.04	5	39.3513	0.433023	100
309	1	1	Control	E	5	01Control	34.5	0.94205	227.063	-15.15	214	226	240.5	34.485	5	39.3513	0.876338	101
325	1	1	Control	E	6	01Control	59	0.9121	229.975	-12.95	218.5	229	241	59.08	5	39.3513	1.50135	102
341	1	1	Control	E	7	01Control	40	0.775	227.9	-13.95	214.5	226.5	241.5	37.33	5	39.3513	0.948636	103
357	1	1	Control	E	8	01Control	37	0.8212	226.545	-14.7	213.5	224.5	240.5	34.51	5	39.3513	0.876973	104
373	1	1	Control	E	9	01Control	35.5	0.823	227.438	-12.5	215	225	240	34.895	5	39.3513	0.886757	105
21	1	1	Control	E	10	01Control	40	0.8579	231.358	-11.7	220	230	243	38.79	5	39.3513	0.985737	106
37	1	1	Control	E	11	01Control	51.5	0.9231	231.085	-11.3	221	230	241	46.63	5	39.3513	1.18497	107
53	1	1	Control	E	12	01Control	38.5	0.93545	232.929	-11.1	222	231.5	243	34.445	5	39.3513	0.875322	108
69	1	1	Control	E	13	01Control	63.5	0.9844	231.605	-12.25	220.5	230	242.5	60.44	5	39.3513	1.53591	109
85	1	1	Control	E	14	01Control	45	0.9224	232.957	-12.65	221.5	232	243.5	42.385	5	39.3513	1.07709	110
101	1	1	Control	E	15	01Control	22.5	0.8638	221.318	-13.65	208.5	219.5	234	20.91	5	39.3513	0.531368	111
117	1	1	Control	E	16	01Control	46	0.8676	234.849	-12.6	224	234.5	244	41.64	5	39.3513	1.05816	112
133	1	1	Control	E	17	01Control	70	0.8499	230.938	-13.25	218.5	230	242.5	63.985	5	39.3513	1.626	113
149	1	1	Control	E	18	01Control	42.5	0.82365	231.386	-14.1	219	231.5	242.5	39.07	5	39.3513	0.992853	114
165	1	1	Control	E	19	01Control	45	0.78905	233.305	-13.55	221.5	232.5	244.5	39.06	5	39.3513	0.992599	115
197	1	1	Control	E	20	01Control	39.5	0.8127	230.154	-14.95	217	230	242.5	36.815	5	39.3513	0.935548	116
213	1	1	Control	E	21	01Control	44.5	0.85925	231.023	-15.35	218	231	243	39.83	5	39.3513	1.01217	117
229	1	1	Control	E	22	01Control	40	0.8079	230.143	-16.95	215.5	230	243.5	34.835	5	39.3513	0.885232	118
245	1	1	Control	E	23	01Control	56.5	0.90645	233.677	-15.6	220	234.5	244.5	47.865	5	39.3513	1.21635	119
261	1	1	Control	E	24	01Control	44	0.8242	234.542	-16.5	221	235.5	244.5	32.95	5	39.3513	0.83733	120
6	1	1	Control	F	1	01Control	41.5	0.9277	222.62	-17.4	207.5	222.5	236.5	33.92	6	39.3513	0.86198	121
182	1	1	Control	F	2	01Control	41.5	0.8746	220.693	-17.5	204.5	218.5	237.5	40.585	6	39.3513	1.03135	122
278	1	1	Control	F	3	01Control	37.5	0.8718	221.388	-16.35	206.5	219.5	236.5	37.87	6	39.3513	0.962358	123
294	1	1	Control	F	4	01Control	41	0.8415	223.053	-15.75	208	222.5	236.5	38.94	6	39.3513	0.989549	124
310	1	1	Control	F	5	01Control	42.5	0.85835	223.075	-14.15	210.5	222	236	42.7	6	39.3513	1.0851	125
326	1	1	Control	F	6	01Control	38.5	0.79745	226.262	-13.85	213	225	239	38.905	6	39.3513	0.98866	126
342	1	1	Control	F	7	01Control	40	0.825	224.846	-13.75	212	223.5	238	38.26	6	39.3513	0.972269	127
358	1	1	Control	F	8	01Control	42.5	0.7987	225.8	-12.3	214.5	223.5	238	40.105	6	39.3513	1.01915	128
374	1	1	Control	F	9	01Control	5.5	0.75	206.389	-17.8	189	202.5	226.5	5.435	6	39.3513	0.138115	129
22	1	1	Control	F	10	01Control	22.5	0.69785	231.412	-11.25	221	229.5	242.5	21.97	6	39.3513	0.558305	130
38	1	1	Control	F	11	01Control	43.5	0.8734	231.591	-10.65	220.5	229.5	243	39.27	6	39.3513	0.997935	131
54	1	1	Control	F	12	01Control	39.5	0.8091	229.628	-10.75	218.5	227.5	241.5	35.55	6	39.3513	0.903402	132
70	1	1	Control	F	13	01Control	56	0.9266	232.76	-11.1	222.5	232	242	53.14	6	39.3513	1.3504	133
86	1	1	Control	F	14	01Control	44	0.88905	228.342	-11.5	218	226.5	239	41.15	6	39.3513	1.04571	134
102	1	1	Control	F	15	01Control	42	0.80475	230.79	-13	219	230	242.5	39.38	6	39.3513	1.00073	135
118	1	1	Control	F	16	01Control	44	0.8091	230.149	-11.95	219	229	241.5	39.705	6	39.3513	1.00899	136
134	1	1	Control	F	17	01Control	40.5	0.82715	230.976	-13.6	218.5	230	243	37.005	6	39.3513	0.940377	137
150	1	1	Control	F	18	01Control	43	0.79535	231.566	-13.4	219	230.5	243	39.8	6	39.3513	1.0114	138
166	1	1	Control	F	19	01Control	42	0.8466	231.755	-13.75	219.5	231	243	37.05	6	39.3513	0.94152	139
198	1	1	Control	F	20	01Control	48.5	0.79215	230.47	-13.9	218	230	242	44.705	6	39.3513	1.13605	140
214	1	1	Control	F	21	01Control	43	0.80235	231.575	-14.75	219	231.5	243	38.15	6	39.3513	0.969474	141
230	1	1	Control	F	22	01Control	57.5	0.89735	226.088	-15.35	213	226.5	237.5	50.05	6	39.3513	1.27188	142
246	1	1	Control	F	23	01Control	52.5	0.85685	223.957	-17.3	209	224.5	237.5	44.985	6	39.3513	1.14317	143
262	1	1	Control	F	24	01Control	51.5	0.889	230.251	-16.35	217	231.5	241	39.405	6	39.3513	1.00137	144
7	1	1	Control	G	1	01Control	68.5	0.91615	217.499	-16.95	202	216.5	232	56.855	7	39.3513	1.44481	145
183	1	1	Control	G	2	01Control	36.5	0.9158	217.458	-17.35	202	216	233.5	35.64	7	39.3513	0.905689	146
279	1	1	Control	G	3	01Control	30	0.85	218.065	-17.45	201.5	215.5	235.5	32.45	7	39.3513	0.824624	147
295	1	1	Control	G	4	01Control	40	0.77245	220.016	-15.85	205	218	236	39.96	7	39.3513	1.01547	148
311	1	1	Control	G	5	01Control	37	0.8421	221.45	-14.2	207.5	219	235.5	38.92	7	39.3513	0.989041	149
327	1	1	Control	G	6	01Control	38	0.8278	222.183	-14.4	208.5	220	237	40.185	7	39.3513	1.02119	150
343	1	1	Control	G	7	01Control	39.5	0.815	224.375	-12.75	212	223	237	38.195	7	39.3513	0.970617	151
359	1	1	Control	G	8	01Control	40.5	0.79535	224.973	-12.55	213	223.5	237.5	40.445	7	39.3513	1.02779	152
375	1	1	Control	G	9	01Control	31	0.82085	225.609	-12.5	213.5	224	238.5	31.365	7	39.3513	0.797052	153
23	1	1	Control	G	10	01Control	39	0.8367	226.604	-11.15	215.5	224	239	39.9	7	39.3513	1.01394	154
39	1	1	Control	G	11	01Control	4.5	0.70835	211.375	-14.55	197.5	207.5	230.5	4.285	7	39.3513	0.108891	155
55	1	1	Control	G	12	01Control	43	0.86205	226.756	-11.85	215	225.5	238.5	40.965	7	39.3513	1.04101	156
71	1	1	Control	G	13	01Control	39	0.8814	228.206	-12	217	226	240.5	39.375	7	39.3513	1.0006	157
87	1	1	Control	G	14	01Control	53.5	0.8194	225.854	-12.65	214	224	237.5	52.715	7	39.3513	1.3396	158
103	1	1	Control	G	15	01Control	41	0.8293	228.051	-13.05	215.5	227	240	40.29	7	39.3513	1.02386	159
119	1	1	Control	G	16	01Control	40	0.8782	228.085	-13.1	215.5	227	240	37.8	7	39.3513	0.960579	160
135	1	1	Control	G	17	01Control	42	0.8333	228.357	-13.35	216.5	227.5	239.5	39.335	7	39.3513	0.999587	161
151	1	1	Control	G	18	01Control	42	0.86555	227.389	-13.65	215	226	240	40.635	7	39.3513	1.03262	162
167	1	1	Control	G	19	01Control	43.5	0.8554	227.36	-13.6	215.5	226	239.5	40.015	7	39.3513	1.01687	163
199	1	1	Control	G	20	01Control	43	0.8829	226.885	-14.4	214.5	225.5	239.5	42.405	7	39.3513	1.0776	164
215	1	1	Control	G	21	01Control	39.5	0.8947	227.693	-15.15	214.5	227.5	240	38.03	7	39.3513	0.966424	165
231	1	1	Control	G	22	01Control	40	0.875	224.969	-16.55	210.5	224	239	37.17	7	39.3513	0.94457	166
247	1	1	Control	G	23	01Control	75.5	0.8278	218.567	-17.15	204	218	232	65.875	7	39.3513	1.67403	167
263	1	1	Control	G	24	01Control	45	0.85565	225.851	-18.25	211	226.5	238.5	34.895	7	39.3513	0.886757	168
8	1	1	Control	H	1	01Control	51.5	0.86675	210.807	-17.8	195	209	228	46.175	8	39.3513	1.17341	169
184	1	1	Control	H	2	01Control	42.5	0.8415	211.316	-16.25	196	209	227	45	8	39.3513	1.14355	170
280	1	1	Control	H	3	01Control	36.5	0.8902	217.058	-16.55	201.5	216	232	39.985	8	39.3513	1.0161	171
296	1	1	Control	H	4	01Control	39	0.7721	216.383	-15.45	202	214	232	40.905	8	39.3513	1.03948	172
312	1	1	Control	H	5	01Control	36	0.82005	218.257	-14.15	204.5	215.5	233	39.865	8	39.3513	1.01306	173
328	1	1	Control	H	6	01Control	33.5	0.89575	221.731	-13.65	208.5	219	236	36.255	8	39.3513	0.921318	174
344	1	1	Control	H	7	01Control	37	0.84945	221.132	-12.7	209	218.5	234.5	38.705	8	39.3513	0.983577	175
360	1	1	Control	H	8	01Control	36.5	0.8197	223.175	-11.25	212	220.5	236.5	37.47	8	39.3513	0.952193	176
376	1	1	Control	H	9	01Control	40.5	0.80215	224.045	-11.9	212.5	222	236.5	43.315	8	39.3513	1.10073	177
24	1	1	Control	H	10	01Control	38.5	0.8688	223.816	-11.65	212.5	221.5	235.5	40.535	8	39.3513	1.03008	178
40	1	1	Control	H	11	01Control	40	0.8397	223.797	-12.2	213	222	235.5	39.395	8	39.3513	1.00111	179
56	1	1	Control	H	12	01Control	40.5	0.91275	225.748	-12.1	214.5	223.5	237	39.755	8	39.3513	1.01026	180
72	1	1	Control	H	13	01Control	45	0.82675	223.369	-11.8	212	221	234.5	47.37	8	39.3513	1.20377	181
88	1	1	Control	H	14	01Control	24.5	0.78475	228.007	-13.9	215	227	240.5	24.815	8	39.3513	0.630603	182
104	1	1	Control	H	15	01Control	23.5	0.8091	224.154	-11	213	221.5	235.5	23.855	8	39.3513	0.606207	183
120	1	1	Control	H	16	01Control	39.5	0.8357	224.51	-13.05	213	222.5	236.5	38.59	8	39.3513	0.980655	184
136	1	1	Control	H	17	01Control	39	0.83335	224.736	-13	212.5	223.5	237.5	38.6	8	39.3513	0.980909	185
152	1	1	Control	H	18	01Control	37	0.8575	225.31	-13.6	212.5	224	238	37.675	8	39.3513	0.957403	186
168	1	1	Control	H	19	01Control	44	0.8688	225.531	-13.6	212.5	224	238.5	41.25	8	39.3513	1.04825	187
200	1	1	Control	H	20	01Control	39.5	0.90815	226.097	-14.4	212.5	224.5	239.5	39.665	8	39.3513	1.00797	188
216	1	1	Control	H	21	01Control	46	0.85185	223.349	-14.9	210.5	223.5	234.5	44.83	8	39.3513	1.13923	189
232	1	1	Control	H	22	01Control	37	0.85135	220.833	-16.3	205	219	236	35.55	8	39.3513	0.903402	190
248	1	1	Control	H	23	01Control	38	0.8831	220.457	-17.95	204.5	219	236.5	35.04	8	39.3513	0.890442	191
264	1	1	Control	H	24	01Control	43.5	0.9093	219.122	-18.15	203	218.5	234	35.43	8	39.3513	0.900353	192
9	1	1	Control	I	1	01Control	43.5	0.8038	211.499	-17.85	194.5	209	230.5	41.575	9	39.3513	1.05651	193
185	1	1	Control	I	2	01Control	31	0.7765	214.824	-16.7	197	211	234	33.19	9	39.3513	0.843429	194
281	1	1	Control	I	3	01Control	32.5	0.8548	211.356	-16.35	196	208	228.5	37.765	9	39.3513	0.95969	195
297	1	1	Control	I	4	01Control	34.5	0.8698	213.491	-15.4	198.5	210	231	37.56	9	39.3513	0.95448	196
313	1	1	Control	I	5	01Control	31.5	0.85605	214.234	-14.05	201	212	228.5	35.42	9	39.3513	0.900098	197
329	1	1	Control	I	6	01Control	32.5	0.85415	216.864	-14.9	202	213.5	233.5	37.91	9	39.3513	0.963375	198
345	1	1	Control	I	7	01Control	42	0.9762	215.773	-12	203.5	213	229	45.215	9	39.3513	1.14901	199
361	1	1	Control	I	8	01Control	36	0.83595	218.555	-11.95	207	215.5	232	38.69	9	39.3513	0.983196	200
377	1	1	Control	I	9	01Control	45	0.87745	216.284	-12.55	204	214	230	50.415	9	39.3513	1.28115	201
25	1	1	Control	I	10	01Control	35	0.861	221.118	-10.15	212	219.5	231	39.02	9	39.3513	0.991582	202
41	1	1	Control	I	11	01Control	35	0.8281	220.733	-12.6	208	218	234	36.295	9	39.3513	0.922334	203
57	1	1	Control	I	12	01Control	37.5	0.8014	218.546	-12.75	206.5	216	231.5	38.69	9	39.3513	0.983196	204
73	1	1	Control	I	13	01Control	43	0.85945	220.782	-12.35	209	219	232.5	48.055	9	39.3513	1.22118	205
89	1	1	Control	I	14	01Control	36.5	0.8902	222.124	-12.8	209.5	220	235.5	37.915	9	39.3513	0.963502	206
105	1	1	Control	I	15	01Control	13.5	0.6583	212.358	-15.1	198.5	209.5	227	14.45	9	39.3513	0.367206	207
121	1	1	Control	I	16	01Control	36.5	0.8578	217.81	-12.8	205.5	216.5	230.5	37.78	9	39.3513	0.960071	208
137	1	1	Control	I	17	01Control	36	0.83185	222.783	-13.35	210	221	235.5	36.94	9	39.3513	0.938725	209
153	1	1	Control	I	18	01Control	38.5	0.88035	215.505	-13.25	202.5	213.5	229	40.45	9	39.3513	1.02792	210
169	1	1	Control	I	19	01Control	45.5	0.9356	222.186	-13.85	210	221.5	234	45.485	9	39.3513	1.15587	211
201	1	1	Control	I	20	01Control	37	0.8807	215.173	-15.9	200.5	213	231	39.68	9	39.3513	1.00835	212
217	1	1	Control	I	21	01Control	36	0.8891	219.363	-17.2	203.5	218	234.5	36.875	9	39.3513	0.937073	213
233	1	1	Control	I	22	01Control	41	0.9268	216.484	-18.4	199	216	232.5	41	9	39.3513	1.0419	214
249	1	1	Control	I	23	01Control	16.5	0.8898	218.321	-18.95	202.5	218	233	15.61	9	39.3513	0.396684	215
265	1	1	Control	I	24	01Control	55	0.9354	213.904	-17.85	197.5	212.5	230	47.155	9	39.3513	1.19831	216
10	1	1	Control	J	1	01Control	43	0.83695	209.176	-18.25	192	207.5	227	43.985	10	39.3513	1.11775	217
186	1	1	Control	J	2	01Control	38.5	0.77935	207.856	-16.3	192	204.5	227	42.115	10	39.3513	1.07023	218
282	1	1	Control	J	3	01Control	35.5	0.8452	209.022	-16.25	193	207	226	42.255	10	39.3513	1.07379	219
298	1	1	Control	J	4	01Control	36.5	0.82205	212.952	-16	197	209	231	41.12	10	39.3513	1.04495	220
314	1	1	Control	J	5	01Control	29.5	0.79655	210.552	-15	195	206.5	229	34.91	10	39.3513	0.887138	221
330	1	1	Control	J	6	01Control	33.5	0.86625	212.897	-14.5	198	209.5	230.5	39.405	10	39.3513	1.00137	222
346	1	1	Control	J	7	01Control	43	0.88235	212.901	-13.05	200	210	226	47.52	10	39.3513	1.20759	223
362	1	1	Control	J	8	01Control	35	0.8333	215.716	-12.6	202	212	231.5	38.775	10	39.3513	0.985356	224
378	1	1	Control	J	9	01Control	35.5	0.864	215.388	-13.05	202.5	212	230	41.3	10	39.3513	1.04952	225
26	1	1	Control	J	10	01Control	34	0.9116	214.567	-12.55	201.5	211	229.5	39.11	10	39.3513	0.993869	226
42	1	1	Control	J	11	01Control	36.5	0.8662	212.936	-12.55	200	210	227.5	39.3	10	39.3513	0.998698	227
58	1	1	Control	J	12	01Control	36	0.87175	217.366	-12.55	205	214	232	38.275	10	39.3513	0.97265	228
74	1	1	Control	J	13	01Control	32.5	0.9375	221.32	-12.75	208.5	219	233.5	37.53	10	39.3513	0.953718	229
90	1	1	Control	J	14	01Control	35	0.88565	219.319	-13	207	217	233	38.39	10	39.3513	0.975573	230
106	1	1	Control	J	15	01Control	32	0.9116	221.008	-12.75	209	219.5	234	35.36	10	39.3513	0.898574	231
122	1	1	Control	J	16	01Control	34.5	0.89875	220.531	-13.4	208	217	234	36.53	10	39.3513	0.928306	232
138	1	1	Control	J	17	01Control	37	0.8919	220.56	-13.25	207	218	233.5	39.675	10	39.3513	1.00823	233
154	1	1	Control	J	18	01Control	36.5	0.89155	215.783	-13.3	203.5	214	228.5	39.735	10	39.3513	1.00975	234
170	1	1	Control	J	19	01Control	56	0.86375	220.027	-13	208.5	219.5	231	57.075	10	39.3513	1.4504	235
202	1	1	Control	J	20	01Control	5	0.775	211.283	-17.5	196.5	209	229	5.545	10	39.3513	0.14091	236
218	1	1	Control	J	21	01Control	34.5	0.87185	219.882	-17.5	204.5	218.5	235	36.755	10	39.3513	0.934024	237
234	1	1	Control	J	22	01Control	34	0.9265	215.672	-17.1	199	213.5	233	34.955	10	39.3513	0.888282	238
250	1	1	Control	J	23	01Control	32.5	0.88865	211.572	-17.95	195	210.5	228.5	32.605	10	39.3513	0.828563	239
266	1	1	Control	J	24	01Control	43.5	0.9142	215.536	-18.95	199	214.5	231	38.515	10	39.3513	0.978749	240
11	1	1	Control	K	1	01Control	42.5	0.8723	206.382	-18.6	188.5	204	224.5	41.72	11	39.3513	1.0602	241
187	1	1	Control	K	2	01Control	37	0.8243	201.094	-16.65	185	197.5	219.5	42.485	11	39.3513	1.07964	242
283	1	1	Control	K	3	01Control	33.5	0.9109	204.575	-17.4	187.5	200.5	224	40.265	11	39.3513	1.02322	243
299	1	1	Control	K	4	01Control	31.5	0.8895	207.001	-16.3	190.5	204	225	35.645	11	39.3513	0.905816	244
315	1	1	Control	K	5	01Control	35.5	0.90995	210.321	-14.55	195.5	206	228	42.265	11	39.3513	1.07404	245
331	1	1	Control	K	6	01Control	32	0.7952	211.258	-15.45	195.5	207.5	229	37.445	11	39.3513	0.951558	246
347	1	1	Control	K	7	01Control	41	0.9125	204.474	-13.4	191	201.5	220.5	45.98	11	39.3513	1.16845	247
363	1	1	Control	K	8	01Control	34.5	0.86975	213.093	-13.35	199	208.5	230	38.41	11	39.3513	0.976081	248
379	1	1	Control	K	9	01Control	35.5	0.85715	214.088	-13.2	200.5	210	230	41.785	11	39.3513	1.06185	249
27	1	1	Control	K	10	01Control	33.5	0.8548	213.638	-13.5	200	210	230.5	38.825	11	39.3513	0.986627	250
43	1	1	Control	K	11	01Control	36.5	0.88565	214.507	-12.1	201.5	211	229.5	39.885	11	39.3513	1.01356	251
59	1	1	Control	K	12	01Control	35.5	0.8472	215.768	-13.4	202.5	212.5	231	38.49	11	39.3513	0.978114	252
75	1	1	Control	K	13	01Control	29.5	0.77825	211.66	-13.4	198	208.5	227	33.145	11	39.3513	0.842286	253
91	1	1	Control	K	14	01Control	32.5	0.8769	217.451	-13.65	203.5	214.5	233.5	36.08	11	39.3513	0.91687	254
107	1	1	Control	K	15	01Control	5.5	0.27275	104.424	-8	95.5	102.5	112.5	6.135	11	39.3513	0.155904	255
123	1	1	Control	K	16	01Control	38.5	0.8484	215.754	-13.8	202	213	230	40.785	11	39.3513	1.03643	256
139	1	1	Control	K	17	01Control	20	0.6554	208.82	-16.65	192.5	206.5	226.5	21.485	11	39.3513	0.54598	257
155	1	1	Control	K	18	01Control	33	0.9091	215.717	-13.9	202	213	231	36.195	11	39.3513	0.919793	258
171	1	1	Control	K	19	01Control	24	0.889	214.091	-15.65	199.5	212.5	230	25.47	11	39.3513	0.647248	259
203	1	1	Control	K	20	01Control	35.5	0.9116	215.086	-16.35	199.5	212.5	231.5	38.85	11	39.3513	0.987262	260
219	1	1	Control	K	21	01Control	26.5	0.81125	216.445	-17.25	200	214	234.5	27.98	11	39.3513	0.711032	261
235	1	1	Control	K	22	01Control	38.5	0.87235	210.319	-17.9	194	209	227.5	40.095	11	39.3513	1.0189	262
251	1	1	Control	K	23	01Control	36.5	0.8753	214.832	-18.5	196.5	212.5	233.5	36.89	11	39.3513	0.937454	263
267	1	1	Control	K	24	01Control	45	0.94	215.979	-18.9	199.5	215	232.5	39.945	11	39.3513	1.01509	264
12	1	1	Control	L	1	01Control	41.5	0.89275	204.753	-17.55	187	201.5	224	41.73	12	39.3513	1.06045	265
188	1	1	Control	L	2	01Control	35.5	0.9271	182.266	-15.9	166	179	200.5	40.265	12	39.3513	1.02322	266
284	1	1	Control	L	3	01Control	32	0.9072	197.376	-17.6	179	192.5	219	39.48	12	39.3513	1.00327	267
300	1	1	Control	L	4	01Control	32	0.87645	196.328	-14.9	180	191.5	215	36.82	12	39.3513	0.935675	268
316	1	1	Control	L	5	01Control	31.5	0.8513	201.516	-15.3	185.5	197	220.5	38.65	12	39.3513	0.98218	269
332	1	1	Control	L	6	01Control	30	0.8138	207.128	-15.45	191	203	225.5	36.585	12	39.3513	0.929704	270
348	1	1	Control	L	7	01Control	31	0.81705	209.029	-14.9	193	204.5	227.5	36.305	12	39.3513	0.922588	271
364	1	1	Control	L	8	01Control	34.5	0.94205	210.745	-14.3	195	206.5	229	39.775	12	39.3513	1.01077	272
380	1	1	Control	L	9	01Control	39	0.85985	208.909	-13.3	195.5	205.5	224	46.35	12	39.3513	1.17785	273
28	1	1	Control	L	10	01Control	32	0.8387	210.308	-12.2	197.5	206.5	224	38.215	12	39.3513	0.971125	274
44	1	1	Control	L	11	01Control	23	0.8562	218.85	-8.75	210.5	219	223.5	25.45	12	39.3513	0.646739	275
60	1	1	Control	L	12	01Control	36	0.87175	212.926	-14.5	198.5	209.5	229.5	39.51	12	39.3513	1.00403	276
76	1	1	Control	L	13	01Control	27.5	0.78055	203.801	-15.9	189	201	220.5	31.235	12	39.3513	0.793749	277
92	1	1	Control	L	14	01Control	25.5	0.7697	209.168	-14.25	194.5	206	225.5	29.535	12	39.3513	0.750548	278
108	1	1	Control	L	15	01Control	36	0.90695	213.63	-14.35	199.5	210.5	230	41.585	12	39.3513	1.05676	279
124	1	1	Control	L	16	01Control	0	0	0	0	0	0	0	0	12	39.3513	0	280
140	1	1	Control	L	17	01Control	37.5	0.9068	212.61	-15.6	197	209.5	229	41.845	12	39.3513	1.06337	281
156	1	1	Control	L	18	01Control	15.5	0.8354	213.09	-15.55	198.5	210	228.5	17.465	12	39.3513	0.443823	282
172	1	1	Control	L	19	01Control	40.5	0.8889	211.493	-14.5	198	210.5	224.5	43.91	12	39.3513	1.11585	283
204	1	1	Control	L	20	01Control	0	0	0	0	0	0	0	0	12	39.3513	0	284
220	1	1	Control	L	21	01Control	36.5	0.8976	209.5	-18.2	192	206	229	40.1	12	39.3513	1.01903	285
236	1	1	Control	L	22	01Control	2	0.33335	101.417	-10.85	90.5	99	114	2.175	12	39.3513	0.0552714	286
252	1	1	Control	L	23	01Control	42.5	0.89425	211.318	-19.25	193.5	209	230	44.19	12	39.3513	1.12296	287
268	1	1	Control	L	24	01Control	44	0.86975	210.637	-18.95	193	208.5	229	40.19	12	39.3513	1.02131	288
13	1	1	Control	M	1	01Control	37	0.87295	192.129	-16.05	176.5	188	210	36.695	13	39.3513	0.932499	289
189	1	1	Control	M	2	01Control	32.5	0.93845	184.339	-16.2	167.5	180.5	203	37.51	13	39.3513	0.95321	290
285	1	1	Control	M	3	01Control	39	0.94655	203.53	-15.55	187.5	199	221.5	47.64	13	39.3513	1.21063	291
301	1	1	Control	M	4	01Control	33	0.8747	195.221	-15.4	179	190.5	215	38	13	39.3513	0.965662	292
317	1	1	Control	M	5	01Control	34.5	0.91045	202.239	-15.4	186	197	221.5	42.335	13	39.3513	1.07582	293
333	1	1	Control	M	6	01Control	31	0.8027	197.011	-15.25	181	191	217	37.765	13	39.3513	0.95969	294
349	1	1	Control	M	7	01Control	35	0.9459	202.897	-14.7	187	198.5	221.5	38.945	13	39.3513	0.989676	295
365	1	1	Control	M	8	01Control	43	0.9654	203.107	-13.7	188	199	221	49.17	13	39.3513	1.24952	296
381	1	1	Control	M	9	01Control	35	0.9403	207.825	-13.75	193.5	203	226	41.72	13	39.3513	1.0602	297
29	1	1	Control	M	10	01Control	33	0.92425	209.127	-14.4	194	204.5	227	38.87	13	39.3513	0.98777	298
45	1	1	Control	M	11	01Control	39.5	0.80655	213.788	-13.55	199.5	210.5	230	43.055	13	39.3513	1.09412	299
61	1	1	Control	M	12	01Control	39	0.84605	206.417	-14.05	192	202.5	223.5	42.61	13	39.3513	1.08281	300
77	1	1	Control	M	13	01Control	34.5	0.86975	209.364	-14.75	193.5	204.5	229	39.765	13	39.3513	1.01051	301
93	1	1	Control	M	14	01Control	36.5	0.89135	211.502	-15.6	195.5	207.5	230	41.13	13	39.3513	1.0452	302
109	1	1	Control	M	15	01Control	35.5	0.8902	210.354	-15	196	206	228.5	39.785	13	39.3513	1.01102	303
125	1	1	Control	M	16	01Control	34	0.88645	209.235	-15.3	193.5	204.5	228	37.03	13	39.3513	0.941012	304
141	1	1	Control	M	17	01Control	36.5	0.8933	209.636	-15.9	194.5	206	227	40.77	13	39.3513	1.03605	305
157	1	1	Control	M	18	01Control	35	0.9293	202.659	-15.45	187.5	199.5	220	38.995	13	39.3513	0.990947	306
173	1	1	Control	M	19	01Control	33	0.86055	206.976	-16.6	190.5	204	225.5	35.43	13	39.3513	0.900353	307
205	1	1	Control	M	20	01Control	32.5	0.9021	206.824	-18.05	189	204	226.5	35.52	13	39.3513	0.90264	308
221	1	1	Control	M	21	01Control	37	0.91655	208.811	-19.05	190.5	205.5	228.5	39.04	13	39.3513	0.99209	309
237	1	1	Control	M	22	01Control	32.5	0.9233	206.972	-19.2	188.5	204	226.5	34.86	13	39.3513	0.885868	310
253	1	1	Control	M	23	01Control	38	0.89465	203.744	-19.95	185	201	224	39.005	13	39.3513	0.991201	311
269	1	1	Control	M	24	01Control	40.5	0.85355	210.036	-17.65	194.5	210	224	37.315	13	39.3513	0.948255	312
14	1	1	Control	N	1	01Control	32	0.89275	177.106	-15.1	161.5	173	195.5	33.12	14	39.3513	0.841651	313
190	1	1	Control	N	2	01Control	25	0.8562	186.816	-17.4	169.5	183	207	30.105	14	39.3513	0.765033	314
286	1	1	Control	N	3	01Control	15	0.845	203.569	-15.8	186.5	198	224.5	18.84	14	39.3513	0.478765	315
302	1	1	Control	N	4	01Control	25	0.8601	197.85	-15.35	181	192	218.5	29.76	14	39.3513	0.756266	316
318	1	1	Control	N	5	01Control	33	0.855	192.882	-15.35	177	188	212	41.21	14	39.3513	1.04723	317
334	1	1	Control	N	6	01Control	29	0.8516	196.52	-15.5	180.5	191.5	216.5	35.97	14	39.3513	0.914075	318
350	1	1	Control	N	7	01Control	36	0.9444	200.255	-14.1	184.5	193.5	220.5	41.37	14	39.3513	1.0513	319
366	1	1	Control	N	8	01Control	35	0.9444	197.427	-14.35	182	192	217.5	41.41	14	39.3513	1.05232	320
382	1	1	Control	N	9	01Control	30	0.8132	200.896	-14.85	184.5	196	220.5	36.725	14	39.3513	0.933261	321
30	1	1	Control	N	10	01Control	33.5	0.9394	204.727	-14.7	190	199.5	224	40.71	14	39.3513	1.03453	322
46	1	1	Control	N	11	01Control	30.5	0.83485	211.986	-14.65	197	208	229.5	34.84	14	39.3513	0.885359	323
62	1	1	Control	N	12	01Control	35	0.9132	205.138	-14.55	190	200	224	39.165	14	39.3513	0.995267	324
78	1	1	Control	N	13	01Control	16.5	0.71335	194.707	-16.05	179	190	213.5	19.67	14	39.3513	0.499857	325
94	1	1	Control	N	14	01Control	7	0.68335	201.228	-19.6	183	197	223.5	8.255	14	39.3513	0.209777	326
110	1	1	Control	N	15	01Control	34	0.9118	208.299	-15.8	192.5	204	227.5	39.69	14	39.3513	1.00861	327
126	1	1	Control	N	16	01Control	36	0.8626	206.384	-14.8	191	201.5	225	40.44	14	39.3513	1.02767	328
142	1	1	Control	N	17	01Control	34.5	0.9412	202.951	-15.05	188	199	221	39.505	14	39.3513	1.00391	329
158	1	1	Control	N	18	01Control	33.5	0.9403	202.238	-16.4	185.5	198	221.5	38.525	14	39.3513	0.979003	330
174	1	1	Control	N	19	01Control	34.5	0.86975	202.566	-16.35	186	198.5	222	37.67	14	39.3513	0.957276	331
206	1	1	Control	N	20	01Control	34	0.90995	205.903	-18.3	187.5	202	225.5	39.43	14	39.3513	1.002	332
222	1	1	Control	N	21	01Control	32.5	0.88485	196.375	-18	178.5	192.5	216.5	36.905	14	39.3513	0.937836	333
238	1	1	Control	N	22	01Control	34.5	0.8672	204.845	-20.75	184	201.5	226.5	37.605	14	39.3513	0.955624	334
254	1	1	Control	N	23	01Control	37.5	0.8947	197.469	-20.4	178.5	194.5	218	39.75	14	39.3513	1.01013	335
270	1	1	Control	N	24	01Control	47	0.84655	201.455	-19.05	183	198.5	220.5	43.55	14	39.3513	1.1067	336
15	1	1	Control	O	1	01Control	11	0.6682	200.288	-17.2	182.5	195.5	221.5	12.195	15	39.3513	0.309901	337
191	1	1	Control	O	2	01Control	26.5	0.84485	202.621	-15.95	186	197	223	31.93	15	39.3513	0.81141	338
287	1	1	Control	O	3	01Control	22.5	0.82105	188.983	-14.25	174	183	208.5	29.295	15	39.3513	0.744449	339
303	1	1	Control	O	4	01Control	22.5	0.93375	218.668	-16.4	201.5	212.5	241	27.785	15	39.3513	0.706077	340
319	1	1	Control	O	5	01Control	17	0.8028	202.5	-17.95	183	196.5	226	22.04	15	39.3513	0.560084	341
335	1	1	Control	O	6	01Control	33	0.89395	190.73	-14.65	174.5	184.5	211.5	42.69	15	39.3513	1.08484	342
351	1	1	Control	O	7	01Control	28	0.8132	195.497	-15.8	177.5	188.5	219	33.035	15	39.3513	0.83949	343
367	1	1	Control	O	8	01Control	31	0.87095	205.848	-14.35	191.5	201	224	38.74	15	39.3513	0.984467	344
383	1	1	Control	O	9	01Control	39.5	0.86005	200.531	-14.75	184.5	195	220.5	50.17	15	39.3513	1.27493	345
31	1	1	Control	O	10	01Control	33	0.9394	198.65	-14.6	182.5	192	219.5	41.75	15	39.3513	1.06096	346
47	1	1	Control	O	11	01Control	38	0.8972	198.466	-14.45	182.5	192.5	219	46.365	15	39.3513	1.17823	347
63	1	1	Control	O	12	01Control	30.5	0.8504	204.792	-15.05	189.5	200	222.5	36.86	15	39.3513	0.936692	348
79	1	1	Control	O	13	01Control	29	0.82735	197.438	-16.2	180	191	219.5	34.92	15	39.3513	0.887392	349
95	1	1	Control	O	14	01Control	32	0.87045	196.838	-15.45	181	192	217.5	38.66	15	39.3513	0.982434	350
111	1	1	Control	O	15	01Control	34	0.94115	203.586	-16.15	187	199	223.5	41.19	15	39.3513	1.04673	351
127	1	1	Control	O	16	01Control	34	0.93845	202.789	-15.65	185.5	197.5	223.5	39.645	15	39.3513	1.00746	352
143	1	1	Control	O	17	01Control	42	0.8873	211.31	-15.55	195.5	207.5	229.5	49.645	15	39.3513	1.26159	353
159	1	1	Control	O	18	01Control	28.5	0.8973	207.974	-18	190	204	228	34.145	15	39.3513	0.867698	354
175	1	1	Control	O	19	01Control	36	0.8648	197.376	-17.75	179.5	193	219	40.745	15	39.3513	1.03542	355
207	1	1	Control	O	20	01Control	19	0.84015	203.331	-17.65	185.5	200.5	223.5	22.825	15	39.3513	0.580032	356
223	1	1	Control	O	21	01Control	39	0.87875	197.876	-19.3	179	194	219	45.355	15	39.3513	1.15257	357
239	1	1	Control	O	22	01Control	22	0.775	190.017	-18.7	170.5	186	212	24.225	15	39.3513	0.615609	358
255	1	1	Control	O	23	01Control	42	0.85605	198.867	-20.1	179	195	220.5	45.105	15	39.3513	1.14622	359
271	1	1	Control	O	24	01Control	48	0.86145	199.441	-20	181	197.5	218.5	46.26	15	39.3513	1.17557	360
16	1	1	Control	P	1	01Control	52	0.84615	201.458	-14.4	186	196.5	219	38.98	16	39.3513	0.990566	361
192	1	1	Control	P	2	01Control	42.5	0.82695	188.171	-12.8	174.5	184	204.5	38.745	16	39.3513	0.984594	362
288	1	1	Control	P	3	01Control	40.5	0.904	198.302	-13.1	183.5	193.5	216	38.93	16	39.3513	0.989295	363
304	1	1	Control	P	4	01Control	43.5	0.8269	199.584	-13.5	185.5	194.5	217.5	39.29	16	39.3513	0.998444	364
320	1	1	Control	P	5	01Control	42	0.9186	202.811	-13	188	197	221	38.35	16	39.3513	0.974556	365
336	1	1	Control	P	6	01Control	39.5	0.9058	198.946	-12.75	184	193.5	218	37.225	16	39.3513	0.945967	366
352	1	1	Control	P	7	01Control	42	0.8787	205.626	-12.35	191.5	199	222	37.45	16	39.3513	0.951685	367
368	1	1	Control	P	8	01Control	45.5	0.8477	204.746	-12.95	190.5	199.5	219	40.435	16	39.3513	1.02754	368
384	1	1	Control	P	9	01Control	19	0.71795	200.728	-14.5	182.5	195	222	17.15	16	39.3513	0.435818	369
32	1	1	Control	P	10	01Control	51	0.8839	205.617	-13.2	191	200	223	46.96	16	39.3513	1.19335	370
48	1	1	Control	P	11	01Control	45	0.91095	204.879	-13.7	190.5	200.5	222.5	39.545	16	39.3513	1.00492	371
64	1	1	Control	P	12	01Control	52.5	0.86335	208.307	-13.6	193.5	203.5	228	44.09	16	39.3513	1.12042	372
80	1	1	Control	P	13	01Control	11.5	0.75	208.841	-14.8	191	202	231.5	10.45	16	39.3513	0.265557	373
96	1	1	Control	P	14	01Control	44.5	0.86725	204.629	-13.9	190.5	201	221.5	38.77	16	39.3513	0.985229	374
112	1	1	Control	P	15	01Control	54	0.87085	207.913	-13.75	193.5	203	226	47.81	16	39.3513	1.21496	375
128	1	1	Control	P	16	01Control	47.5	0.89575	208.111	-14.5	193	203.5	226	40.675	16	39.3513	1.03364	376
144	1	1	Control	P	17	01Control	40.5	0.89635	208.938	-14	194	206	224.5	37.47	16	39.3513	0.952193	377
160	1	1	Control	P	18	01Control	44	0.85285	209.961	-14.55	194	205.5	225.5	38.24	16	39.3513	0.971761	378
176	1	1	Control	P	19	01Control	26.5	0.7841	195.848	-16.3	179.5	192.5	213.5	22.075	16	39.3513	0.560973	379
208	1	1	Control	P	20	01Control	47	0.88665	207.603	-15.45	192.5	204.5	225	41.82	16	39.3513	1.06274	380
224	1	1	Control	P	21	01Control	57	0.8662	204.276	-15.8	189.5	202.5	219.5	48.545	16	39.3513	1.23363	381
240	1	1	Control	P	22	01Control	49.5	0.81815	205.575	-16.55	190	203.5	221.5	43.62	16	39.3513	1.10848	382
256	1	1	Control	P	23	01Control	27	0.81855	205.815	-18.6	188.5	203	222	22.5	16	39.3513	0.571773	383
272	1	1	Control	P	24	01Control	49	0.8673	207.652	-19.5	190	206.5	224.5	39.24	16	39.3513	0.997173	384

## Sheet: MEAN WT
The values for the normalized median colony size are taken from the Plate_YPD/YNB/SC tabs (highlighted in grey)
YPD
	CLIB214	CPRI
	33.445	35.295
	30.385	34.82
	30.335	33.78
	35.135	35.79
	31.52	32.845
	33.1	36.015
	32.99	31.015
	28.7	36.39
MEAN	31.9512	34.4937
MEAN WT	33.2225
YNB
	CLIB214	CPRI
	43.055	44.965
	49.675	47.54
	47.26	46.86
	45.66	44.66
	47.895	46.55
	40.98	45.35
	42.77	45.43
	41.245	44.75
MEAN	44.8175	45.7631
MEAN WT	45.2903
SC
	CLIB214	CPRI
	38.92	38.195
	40.185	40.445
	39.335	40.015
	40.635	42.405
	39.865	38.705
	36.255	37.47
	38.6	41.25
	37.675	39.665
MEAN	38.9338	39.7688
MEAN WT	39.3513
