# Supplementary material for: Alternative sulphur metabolism in the fungal pathogen Candida parapsilosis
Source: Nat Commun. 2024 Oct 24;15:9190. doi: 10.1038/s41467-024-53442-8 (PMC11502921; doi:10.1038/s41467-024-53442-8)
Supplement: Supplementary file 5 — Supplementary Data 3 [file 41467_2024_53442_MOESM5_ESM.xlsx]

## Sheet: Large scale phenotype screening
LABEL IN EXCEL FILE in the format RXPY, where X is the EXP number and Y is the Plate number
E.G. In the "YNB based conditions" tab, the plate R1P1 (YNB base (no AS) is indicated by EXP 1 (X) and Plate 1 (Y)
E.G. In the "YNB based conditions" tab, the plate R2P2 (YNB + Cysteine) is indicated by EXP 2 (X) and Plate 2 (Y)
	RUN	Plate	Nitrogen source		LABEL IN EXCEL FILE	PIC taken @
YNB based	1	1	YNB base (no AS)		R1P1	48h
Yeast Nitrogen Base: 0.19% YNB without Ammonium Sulphate (AS) and without Amino Acids (AA), 2% Glucose, 2% Bacto agar	2	2	Cysteine		R2P2
	1	3	Alanine		R1P3
	1	4	Allantoin		R1P4
	1	5	Arginine		R1P5
	2	1	Lysine		R2P1
	1	7	GABA		R1P7
	1	8	Glutamate		R1P8
Add: 0.5% Ammonium Sulphate (CTRL) or 10 mM Alternative N source (EXP PLATES)	1	9	Glutamine		R1P9
	1	10	Glycine		R1P0
	1	11	Isoleucine		R1P11
	1	12	L-Histidine		R1P12
	1	13	L-Ornithine		R1P13
	1	14	L-Tryptophan		R1P14
	1	15	Leucine		R1P15
	1	17	Methionine		R1P17
	1	18	AS (CTRL plate Run 1)		R1P18
	1	19	Proline		R1P19
	1	20	Serine		R1P20
	1	21	Threonine		R1P21
	1	22	Valine		R1P22
	1	23	Urea		R1P23
	2	3	Aspartic acid		R2P3
	2	24	AS (CTRL plate Run 2)		R2P24
	RUN	Plate	AA		LABEL IN EXCEL FILE	PIC taken @
SC based	3	1	-His		R3P1	24h
Synthetic Complete Media: 0.19% YNB without Ammonium Sulphate and without Amino Acids, 0.5% Ammonium Sulphate, 2% Glucose, 2% Bacto agar	3	2	-Trp Phe Tyr		R3P2
	3	3	-Asn Thr Cys Met Asp		R3P3
	3	4	-Met Cys Ser Gly		R3P4
	3	5	-Leu Val ile		R3P5
	3	6	-Ala		R3P6
Add: 0.2% Amino acid mix (CTRL) or Drop-out mix (EXP PLATES)	3	7	-Lys Arg Pro Gln Glu		R3P7
	3	8	-Uracil		R3P8
	3	9	-Adenine		R3P9
	3	10	all AA (CTRL)		R3P10
	RUN	Plate	Stressor	Concentration	LABEL IN EXCEL FILE	PIC taken @
YPD based	1	25	YPD (CTRL Run 1)		R1P25	24h
YPD: 1% yeast extract, 2% peptone, 2% glucose, 2% Bacto agar	1	1	EDTA	0.75mM	R1P1	48h
	1	2	Congo Red	250 μg/ml	R1P2	48h
	1	3		350 μg/ml	R1P3	48h
Add: nothing (CTRL) or Compound (EXP PLATES)	1	4	NaCl	1M	R1P4	48h
	4	5	Sorbitol	1M	R4P5	48h
	1	6	Glycerol	0.03	R1P6	48h
	1	7	LiCl	300mM	R1P7	48h
	2	3	Caffeine	10mM	R2P3	24h
	1	10	CuCl2	4mM	R1P10	48h
	1	11		8mM	R1P11	48h
	1	12		10mM	R1P12	48h
	4	13		13 mM	R4P13	48h
	4	14	CuSO4	13 mM	R4P14	48h
	1	15		15 mM	R1P15	48h
	2	6	CdCl2	0.1 mM	R2P6	24h
	2	7		0.3 mM	R2P7	24h
	1	18	Caspofungin	0.05 μg/ml	R1P18	24h
	1	19		0.1 μg/ml	R1P19	24h
	2	8	Fluconazole	2 μg/ml	R2P8	24h
	2	9		4 μg/ml	R2P9	24h
	2	10	Ketoconazole	0.01 μg/ml	R2P10	24h
	1	22		0.005 μg/ml	R1P22	24h
	2	5	H2O2	5 mM	R2P5	48h
	2	4	Caffeine		R2P4	24h
	2	26	YPD (CTRL Run 2)		R2P26	24h
	4	27	YPD (CTRL Run 4)		R4P27	24h

## Sheet: YNB based conditions
RXPY:	X	Y
	EXP	Plate	Type	Row	Col	PlateNames	Exp Size	RowNumeric	Ctrl Size	RowNumeric	ORDER OF THE COLUMN IN THE HEATMAP (internal use only)	PINNING error
1	1	1	Experiment	A	1	01Experiment	0	1.5	49.5	1	1	X
17	1	1	Experiment	A	2	01Experiment	0	1.5	39.5	1	1	X
33	1	1	Experiment	A	3	01Experiment	0	1.5	44	1	1	X
49	1	1	Experiment	A	4	01Experiment	3.5	1.5	39.5	1	1	X
65	1	1	Experiment	A	5	01Experiment	35	1.5	73.5	1	1
81	1	1	Experiment	A	6	01Experiment	22	1.5	47	1	1
97	1	1	Experiment	A	7	01Experiment	35	1.5	68.5	1	1
113	1	1	Experiment	A	8	01Experiment	9.5	1.5	28.5	1	1
129	1	1	Experiment	A	9	01Experiment	18	1.5	34	1	1
145	1	1	Experiment	A	10	01Experiment	26.5	1.5	42	1	1
161	1	1	Experiment	A	11	01Experiment	27.5	1.5	44.5	1	1
177	1	1	Experiment	A	12	01Experiment	36.5	1.5	65.5	1	1
193	1	1	Experiment	A	13	01Experiment	29	1.5	42.5	1	1
209	1	1	Experiment	A	14	01Experiment	33	1.5	42.5	1	1
225	1	1	Experiment	A	15	01Experiment	29.5	1.5	42.5	1	1
241	1	1	Experiment	A	16	01Experiment	34.5	1.5	52.5	1	1
257	1	1	Experiment	A	17	01Experiment	31	1.5	49.5	1	1
273	1	1	Experiment	A	18	01Experiment	37	1.5	58.5	1	1
289	1	1	Experiment	A	19	01Experiment	24.5	1.5	47	1	1
305	1	1	Experiment	A	20	01Experiment	22	1.5	33.5	1	1
321	1	1	Experiment	A	21	01Experiment	25.5	1.5	44	1	1
337	1	1	Experiment	A	22	01Experiment	20.5	1.5	44.5	1	1
353	1	1	Experiment	A	23	01Experiment	14.5	1.5	39	1	1
369	1	1	Experiment	A	24	01Experiment	23.5	1.5	64	1	1
2	1	1	Experiment	B	1	01Experiment	0	3.5	0	2	1	X
18	1	1	Experiment	B	2	01Experiment	0	3.5	29	2	1	X
34	1	1	Experiment	B	3	01Experiment	20.5	3.5	40	2	1
50	1	1	Experiment	B	4	01Experiment	27.5	3.5	53	2	1
66	1	1	Experiment	B	5	01Experiment	26	3.5	35	2	1
82	1	1	Experiment	B	6	01Experiment	23	3.5	38.5	2	1
98	1	1	Experiment	B	7	01Experiment	26.5	3.5	41.5	2	1
114	1	1	Experiment	B	8	01Experiment	29.5	3.5	45.5	2	1
130	1	1	Experiment	B	9	01Experiment	15.5	3.5	24	2	1
146	1	1	Experiment	B	10	01Experiment	29	3.5	23.5	2	1
162	1	1	Experiment	B	11	01Experiment	30	3.5	41	2	1
178	1	1	Experiment	B	12	01Experiment	27	3.5	37	2	1
194	1	1	Experiment	B	13	01Experiment	36.5	3.5	53	2	1
210	1	1	Experiment	B	14	01Experiment	29	3.5	42.5	2	1
226	1	1	Experiment	B	15	01Experiment	31.5	3.5	42.5	2	1
242	1	1	Experiment	B	16	01Experiment	27.5	3.5	39.5	2	1
258	1	1	Experiment	B	17	01Experiment	27	3.5	31.5	2	1
274	1	1	Experiment	B	18	01Experiment	27	3.5	32.5	2	1
290	1	1	Experiment	B	19	01Experiment	25.5	3.5	43	2	1
306	1	1	Experiment	B	20	01Experiment	18.5	3.5	28	2	1
322	1	1	Experiment	B	21	01Experiment	21	3.5	38	2	1
338	1	1	Experiment	B	22	01Experiment	15.5	3.5	28	2	1
354	1	1	Experiment	B	23	01Experiment	17	3.5	35	2	1
370	1	1	Experiment	B	24	01Experiment	19	3.5	40.5	2	1
3	1	1	Experiment	C	1	01Experiment	0	5.5	0	3	1	X
19	1	1	Experiment	C	2	01Experiment	0	5.5	0	3	1	X
35	1	1	Experiment	C	3	01Experiment	6	5.5	23	3	1
51	1	1	Experiment	C	4	01Experiment	4	5.5	35	3	1
67	1	1	Experiment	C	5	01Experiment	40	5.5	88.5	3	1
83	1	1	Experiment	C	6	01Experiment	33.5	5.5	46.5	3	1
99	1	1	Experiment	C	7	01Experiment	24	5.5	31.5	3	1
115	1	1	Experiment	C	8	01Experiment	12.5	5.5	28.5	3	1
131	1	1	Experiment	C	9	01Experiment	22	5.5	59	3	1
147	1	1	Experiment	C	10	01Experiment	29	5.5	35.5	3	1
163	1	1	Experiment	C	11	01Experiment	34.5	5.5	40.5	3	1
179	1	1	Experiment	C	12	01Experiment	43.5	5.5	80	3	1
195	1	1	Experiment	C	13	01Experiment	26	5.5	32	3	1
211	1	1	Experiment	C	14	01Experiment	23	5.5	25.5	3	1
227	1	1	Experiment	C	15	01Experiment	33	5.5	44	3	1
243	1	1	Experiment	C	16	01Experiment	25	5.5	35.5	3	1
259	1	1	Experiment	C	17	01Experiment	26	5.5	35.5	3	1
275	1	1	Experiment	C	18	01Experiment	25.5	5.5	35	3	1
291	1	1	Experiment	C	19	01Experiment	6.5	5.5	26	3	1
307	1	1	Experiment	C	20	01Experiment	6	5.5	46	3	1
323	1	1	Experiment	C	21	01Experiment	15.5	5.5	34.5	3	1
339	1	1	Experiment	C	22	01Experiment	19	5.5	33.5	3	1
355	1	1	Experiment	C	23	01Experiment	6	5.5	19	3	1
371	1	1	Experiment	C	24	01Experiment	23.5	5.5	47	3	1
4	1	1	Experiment	D	1	01Experiment	6.5	7.5	0	4	1	X
20	1	1	Experiment	D	2	01Experiment	6	7.5	0	4	1	X
36	1	1	Experiment	D	3	01Experiment	21	7.5	41	4	1
52	1	1	Experiment	D	4	01Experiment	28	7.5	37	4	1
68	1	1	Experiment	D	5	01Experiment	21.5	7.5	30.5	4	1
84	1	1	Experiment	D	6	01Experiment	25.5	7.5	37.5	4	1
100	1	1	Experiment	D	7	01Experiment	30.5	7.5	40.5	4	1
116	1	1	Experiment	D	8	01Experiment	29	7.5	34.5	4	1
132	1	1	Experiment	D	9	01Experiment	21	7.5	35.5	4	1
148	1	1	Experiment	D	10	01Experiment	29.5	7.5	43.5	4	1
164	1	1	Experiment	D	11	01Experiment	27.5	7.5	35.5	4	1
180	1	1	Experiment	D	12	01Experiment	31.5	7.5	41.5	4	1
196	1	1	Experiment	D	13	01Experiment	26	7.5	42	4	1
212	1	1	Experiment	D	14	01Experiment	26	7.5	32.5	4	1
228	1	1	Experiment	D	15	01Experiment	27.5	7.5	34	4	1
244	1	1	Experiment	D	16	01Experiment	17	7.5	33	4	1
260	1	1	Experiment	D	17	01Experiment	27	7.5	38.5	4	1
276	1	1	Experiment	D	18	01Experiment	27	7.5	41.5	4	1
292	1	1	Experiment	D	19	01Experiment	30	7.5	48.5	4	1
308	1	1	Experiment	D	20	01Experiment	20	7.5	37.5	4	1
324	1	1	Experiment	D	21	01Experiment	0	7.5	35.5	4	1
340	1	1	Experiment	D	22	01Experiment	24	7.5	57.5	4	1
356	1	1	Experiment	D	23	01Experiment	18.5	7.5	42.5	4	1
372	1	1	Experiment	D	24	01Experiment	20.5	7.5	39	4	1
5	1	1	Experiment	E	1	01Experiment	0	9.5	0	5	1	X
21	1	1	Experiment	E	2	01Experiment	3	9.5	0	5	1	X
37	1	1	Experiment	E	3	01Experiment	17	9.5	29.5	5	1
53	1	1	Experiment	E	4	01Experiment	21.5	9.5	20.5	5	1
69	1	1	Experiment	E	5	01Experiment	32.5	9.5	47	5	1
85	1	1	Experiment	E	6	01Experiment	36	9.5	58.5	5	1
101	1	1	Experiment	E	7	01Experiment	25.5	9.5	32	5	1
117	1	1	Experiment	E	8	01Experiment	23	9.5	25	5	1
133	1	1	Experiment	E	9	01Experiment	18	9.5	26.5	5	1
149	1	1	Experiment	E	10	01Experiment	26	9.5	31	5	1
165	1	1	Experiment	E	11	01Experiment	35.5	9.5	62.5	5	1
181	1	1	Experiment	E	12	01Experiment	29	9.5	41.5	5	1
197	1	1	Experiment	E	13	01Experiment	26.5	9.5	34.5	5	1
213	1	1	Experiment	E	14	01Experiment	24	9.5	31.5	5	1
229	1	1	Experiment	E	15	01Experiment	15	9.5	22	5	1
245	1	1	Experiment	E	16	01Experiment	29	9.5	42	5	1
261	1	1	Experiment	E	17	01Experiment	26	9.5	41.5	5	1
277	1	1	Experiment	E	18	01Experiment	23	9.5	37	5	1
293	1	1	Experiment	E	19	01Experiment	20.5	9.5	37	5	1
309	1	1	Experiment	E	20	01Experiment	18.5	9.5	32	5	1
325	1	1	Experiment	E	21	01Experiment	15.5	9.5	21.5	5	1
341	1	1	Experiment	E	22	01Experiment	15	9.5	39	5	1
357	1	1	Experiment	E	23	01Experiment	27	9.5	62	5	1
373	1	1	Experiment	E	24	01Experiment	23	9.5	48.5	5	1
6	1	1	Experiment	F	1	01Experiment	0	11.5	26	6	1	X
22	1	1	Experiment	F	2	01Experiment	7	11.5	34	6	1	X
38	1	1	Experiment	F	3	01Experiment	21.5	11.5	32.5	6	1
54	1	1	Experiment	F	4	01Experiment	25	11.5	35.5	6	1
70	1	1	Experiment	F	5	01Experiment	26.5	11.5	36	6	1
86	1	1	Experiment	F	6	01Experiment	24	11.5	33	6	1
102	1	1	Experiment	F	7	01Experiment	29	11.5	35.5	6	1
118	1	1	Experiment	F	8	01Experiment	18.5	11.5	27.5	6	1
134	1	1	Experiment	F	9	01Experiment	1	11.5	8	6	1
150	1	1	Experiment	F	10	01Experiment	8.5	11.5	11.5	6	1
166	1	1	Experiment	F	11	01Experiment	28	11.5	38	6	1
182	1	1	Experiment	F	12	01Experiment	22	11.5	29.5	6	1
198	1	1	Experiment	F	13	01Experiment	37.5	11.5	78	6	1
214	1	1	Experiment	F	14	01Experiment	26	11.5	35.5	6	1
230	1	1	Experiment	F	15	01Experiment	24.5	11.5	34	6	1
246	1	1	Experiment	F	16	01Experiment	23.5	11.5	40.5	6	1
262	1	1	Experiment	F	17	01Experiment	18.5	11.5	30.5	6	1
278	1	1	Experiment	F	18	01Experiment	21	11.5	38	6	1
294	1	1	Experiment	F	19	01Experiment	22	11.5	45	6	1
310	1	1	Experiment	F	20	01Experiment	26.5	11.5	39.5	6	1
326	1	1	Experiment	F	21	01Experiment	16.5	11.5	37.5	6	1
342	1	1	Experiment	F	22	01Experiment	27	11.5	54	6	1
358	1	1	Experiment	F	23	01Experiment	14	11.5	36	6	1
374	1	1	Experiment	F	24	01Experiment	21.5	11.5	38.5	6	1
7	1	1	Experiment	G	1	01Experiment	1	13.5	33	7	1	X
23	1	1	Experiment	G	2	01Experiment	13	13.5	34.5	7	1	X
39	1	1	Experiment	G	3	01Experiment	14	13.5	32.5	7	1
55	1	1	Experiment	G	4	01Experiment	23	13.5	32.5	7	1
71	1	1	Experiment	G	5	01Experiment	22.5	13.5	33	7	1
87	1	1	Experiment	G	6	01Experiment	22	13.5	32	7	1
103	1	1	Experiment	G	7	01Experiment	26.5	13.5	32	7	1
119	1	1	Experiment	G	8	01Experiment	28	13.5	30	7	1
135	1	1	Experiment	G	9	01Experiment	19.5	13.5	24.5	7	1
151	1	1	Experiment	G	10	01Experiment	22.5	13.5	30.5	7	1
167	1	1	Experiment	G	11	01Experiment	11	13.5	14.5	7	1
183	1	1	Experiment	G	12	01Experiment	22	13.5	32	7	1
199	1	1	Experiment	G	13	01Experiment	20	13.5	28.5	7	1
215	1	1	Experiment	G	14	01Experiment	15.5	13.5	26	7	1
231	1	1	Experiment	G	15	01Experiment	23.5	13.5	37	7	1
247	1	1	Experiment	G	16	01Experiment	21	13.5	34	7	1
263	1	1	Experiment	G	17	01Experiment	19.5	13.5	32.5	7	1
279	1	1	Experiment	G	18	01Experiment	21.5	13.5	42	7	1
295	1	1	Experiment	G	19	01Experiment	22.5	13.5	40.5	7	1
311	1	1	Experiment	G	20	01Experiment	22	13.5	39.5	7	1
327	1	1	Experiment	G	21	01Experiment	0	13.5	0	7	1
343	1	1	Experiment	G	22	01Experiment	16	13.5	35	7	1
359	1	1	Experiment	G	23	01Experiment	30	13.5	50	7	1
375	1	1	Experiment	G	24	01Experiment	17	13.5	38.5	7	1
8	1	1	Experiment	H	1	01Experiment	4.5	15.5	43.5	8	1	X
24	1	1	Experiment	H	2	01Experiment	18.5	15.5	36	8	1
40	1	1	Experiment	H	3	01Experiment	22.5	15.5	31.5	8	1
56	1	1	Experiment	H	4	01Experiment	20	15.5	32	8	1
72	1	1	Experiment	H	5	01Experiment	20.5	15.5	30	8	1
88	1	1	Experiment	H	6	01Experiment	23.5	15.5	28	8	1
104	1	1	Experiment	H	7	01Experiment	25.5	15.5	37	8	1
120	1	1	Experiment	H	8	01Experiment	25.5	15.5	32.5	8	1
136	1	1	Experiment	H	9	01Experiment	25.5	15.5	35	8	1
152	1	1	Experiment	H	10	01Experiment	22.5	15.5	30	8	1
168	1	1	Experiment	H	11	01Experiment	26	15.5	52.5	8	1
184	1	1	Experiment	H	12	01Experiment	20.5	15.5	26.5	8	1
200	1	1	Experiment	H	13	01Experiment	17	15.5	23	8	1
216	1	1	Experiment	H	14	01Experiment	22.5	15.5	27.5	8	1
232	1	1	Experiment	H	15	01Experiment	17.5	15.5	26.5	8	1
248	1	1	Experiment	H	16	01Experiment	22.5	15.5	29	8	1
264	1	1	Experiment	H	17	01Experiment	18	15.5	31	8	1
280	1	1	Experiment	H	18	01Experiment	18	15.5	27.5	8	1
296	1	1	Experiment	H	19	01Experiment	22	15.5	37	8	1
312	1	1	Experiment	H	20	01Experiment	20.5	15.5	37	8	1
328	1	1	Experiment	H	21	01Experiment	26.5	15.5	54	8	1
344	1	1	Experiment	H	22	01Experiment	16	15.5	33	8	1
360	1	1	Experiment	H	23	01Experiment	17	15.5	34.5	8	1
376	1	1	Experiment	H	24	01Experiment	15	15.5	33	8	1
9	1	1	Experiment	I	1	01Experiment	0.5	17.5	37	9	1	X
25	1	1	Experiment	I	2	01Experiment	9	17.5	28	9	1
41	1	1	Experiment	I	3	01Experiment	21	17.5	28	9	1
57	1	1	Experiment	I	4	01Experiment	22.5	17.5	34.5	9	1
73	1	1	Experiment	I	5	01Experiment	17	17.5	22.5	9	1
89	1	1	Experiment	I	6	01Experiment	18.5	17.5	26.5	9	1
105	1	1	Experiment	I	7	01Experiment	31.5	17.5	43.5	9	1
121	1	1	Experiment	I	8	01Experiment	23	17.5	32.5	9	1
137	1	1	Experiment	I	9	01Experiment	31.5	17.5	53	9	1
153	1	1	Experiment	I	10	01Experiment	13.5	17.5	50.5	9	1
169	1	1	Experiment	I	11	01Experiment	18	17.5	22	9	1
185	1	1	Experiment	I	12	01Experiment	20.5	17.5	27.5	9	1
201	1	1	Experiment	I	13	01Experiment	19.5	17.5	27	9	1
217	1	1	Experiment	I	14	01Experiment	18.5	17.5	21.5	9	1
233	1	1	Experiment	I	15	01Experiment	10.5	17.5	21	9	1
249	1	1	Experiment	I	16	01Experiment	17.5	17.5	30	9	1
265	1	1	Experiment	I	17	01Experiment	18	17.5	28.5	9	1
281	1	1	Experiment	I	18	01Experiment	19.5	17.5	33	9	1
297	1	1	Experiment	I	19	01Experiment	27.5	17.5	53	9	1
313	1	1	Experiment	I	20	01Experiment	19.5	17.5	24.5	9	1
329	1	1	Experiment	I	21	01Experiment	19	17.5	31	9	1
345	1	1	Experiment	I	22	01Experiment	18.5	17.5	29	9	1
361	1	1	Experiment	I	23	01Experiment	13.5	17.5	27	9	1
377	1	1	Experiment	I	24	01Experiment	18	17.5	46.5	9	1
10	1	1	Experiment	J	1	01Experiment	6	19.5	35	10	1	X
26	1	1	Experiment	J	2	01Experiment	17	19.5	29.5	10	1
42	1	1	Experiment	J	3	01Experiment	27.5	19.5	45	10	1
58	1	1	Experiment	J	4	01Experiment	20.5	19.5	30	10	1
74	1	1	Experiment	J	5	01Experiment	16	19.5	24	10	1
90	1	1	Experiment	J	6	01Experiment	20	19.5	26	10	1
106	1	1	Experiment	J	7	01Experiment	30	19.5	50	10	1
122	1	1	Experiment	J	8	01Experiment	22	19.5	26	10	1
138	1	1	Experiment	J	9	01Experiment	18.5	19.5	26	10	1
154	1	1	Experiment	J	10	01Experiment	17.5	19.5	21.5	10	1
170	1	1	Experiment	J	11	01Experiment	23.5	19.5	33.5	10	1
186	1	1	Experiment	J	12	01Experiment	19	19.5	21	10	1
202	1	1	Experiment	J	13	01Experiment	18.5	19.5	24.5	10	1
218	1	1	Experiment	J	14	01Experiment	22	19.5	25.5	10	1
234	1	1	Experiment	J	15	01Experiment	10	19.5	45	10	1
250	1	1	Experiment	J	16	01Experiment	21	19.5	25	10	1
266	1	1	Experiment	J	17	01Experiment	18.5	19.5	27.5	10	1
282	1	1	Experiment	J	18	01Experiment	21.5	19.5	30	10	1
298	1	1	Experiment	J	19	01Experiment	28	19.5	51.5	10	1
314	1	1	Experiment	J	20	01Experiment	0.5	19.5	6	10	1
330	1	1	Experiment	J	21	01Experiment	0	19.5	7.5	10	1
346	1	1	Experiment	J	22	01Experiment	11.5	19.5	20.5	10	1
362	1	1	Experiment	J	23	01Experiment	14	19.5	23.5	10	1
378	1	1	Experiment	J	24	01Experiment	15	19.5	30	10	1
11	1	1	Experiment	K	1	01Experiment	11	21.5	34	11	1
27	1	1	Experiment	K	2	01Experiment	13	21.5	30	11	1
43	1	1	Experiment	K	3	01Experiment	18.5	21.5	28	11	1
59	1	1	Experiment	K	4	01Experiment	21	21.5	25.5	11	1
75	1	1	Experiment	K	5	01Experiment	21	21.5	27.5	11	1
91	1	1	Experiment	K	6	01Experiment	21.5	21.5	33	11	1
107	1	1	Experiment	K	7	01Experiment	21	21.5	25.5	11	1
123	1	1	Experiment	K	8	01Experiment	21	21.5	27.5	11	1
139	1	1	Experiment	K	9	01Experiment	21	21.5	27.5	11	1
155	1	1	Experiment	K	10	01Experiment	17.5	21.5	23.5	11	1
171	1	1	Experiment	K	11	01Experiment	21	21.5	25	11	1
187	1	1	Experiment	K	12	01Experiment	13	21.5	19	11	1
203	1	1	Experiment	K	13	01Experiment	23.5	21.5	32	11	1
219	1	1	Experiment	K	14	01Experiment	20	21.5	20	11	1
235	1	1	Experiment	K	15	01Experiment	4	21.5	5	11	1
251	1	1	Experiment	K	16	01Experiment	18.5	21.5	29	11	1
267	1	1	Experiment	K	17	01Experiment	9	21.5	13.5	11	1
283	1	1	Experiment	K	18	01Experiment	17	21.5	23	11	1
299	1	1	Experiment	K	19	01Experiment	19	21.5	34.5	11	1
315	1	1	Experiment	K	20	01Experiment	20.5	21.5	29	11	1
331	1	1	Experiment	K	21	01Experiment	15.5	21.5	14	11	1
347	1	1	Experiment	K	22	01Experiment	19.5	21.5	26	11	1
363	1	1	Experiment	K	23	01Experiment	14.5	21.5	23	11	1
379	1	1	Experiment	K	24	01Experiment	19	21.5	32	11	1
12	1	1	Experiment	L	1	01Experiment	14.5	23.5	37.5	12	1
28	1	1	Experiment	L	2	01Experiment	11.5	23.5	26	12	1
44	1	1	Experiment	L	3	01Experiment	10	23.5	14.5	12	1
60	1	1	Experiment	L	4	01Experiment	18	23.5	28	12	1
76	1	1	Experiment	L	5	01Experiment	19.5	23.5	28	12	1
92	1	1	Experiment	L	6	01Experiment	18	23.5	28.5	12	1
108	1	1	Experiment	L	7	01Experiment	20	23.5	24	12	1
124	1	1	Experiment	L	8	01Experiment	21	23.5	23	12	1
140	1	1	Experiment	L	9	01Experiment	19	23.5	28.5	12	1
156	1	1	Experiment	L	10	01Experiment	18	23.5	35	12	1
172	1	1	Experiment	L	11	01Experiment	5	23.5	12.5	12	1
188	1	1	Experiment	L	12	01Experiment	21	23.5	27.5	12	1
204	1	1	Experiment	L	13	01Experiment	7.5	23.5	18	12	1
220	1	1	Experiment	L	14	01Experiment	10	23.5	26	12	1
236	1	1	Experiment	L	15	01Experiment	21.5	23.5	29.5	12	1
252	1	1	Experiment	L	16	01Experiment	0	23.5	0.5	12	1
268	1	1	Experiment	L	17	01Experiment	19	23.5	29	12	1
284	1	1	Experiment	L	18	01Experiment	8.5	23.5	23.5	12	1
300	1	1	Experiment	L	19	01Experiment	28	23.5	42	12	1
316	1	1	Experiment	L	20	01Experiment	0	23.5	0	12	1
332	1	1	Experiment	L	21	01Experiment	18.5	23.5	29.5	12	1
348	1	1	Experiment	L	22	01Experiment	0	23.5	1	12	1
364	1	1	Experiment	L	23	01Experiment	16.5	23.5	31.5	12	1
380	1	1	Experiment	L	24	01Experiment	21	23.5	35	12	1
13	1	1	Experiment	M	1	01Experiment	10.5	25.5	29.5	13	1
29	1	1	Experiment	M	2	01Experiment	11	25.5	31	13	1
45	1	1	Experiment	M	3	01Experiment	23	25.5	38	13	1
61	1	1	Experiment	M	4	01Experiment	15.5	25.5	24.5	13	1
77	1	1	Experiment	M	5	01Experiment	20.5	25.5	28	13	1
93	1	1	Experiment	M	6	01Experiment	16	25.5	23	13	1
109	1	1	Experiment	M	7	01Experiment	18	25.5	23.5	13	1
125	1	1	Experiment	M	8	01Experiment	27.5	25.5	38	13	1
141	1	1	Experiment	M	9	01Experiment	21	25.5	28.5	13	1
157	1	1	Experiment	M	10	01Experiment	18	25.5	24	13	1
173	1	1	Experiment	M	11	01Experiment	27	25.5	52.5	13	1
189	1	1	Experiment	M	12	01Experiment	25.5	25.5	41.5	13	1
205	1	1	Experiment	M	13	01Experiment	18	25.5	23	13	1
221	1	1	Experiment	M	14	01Experiment	16.5	25.5	24.5	13	1
237	1	1	Experiment	M	15	01Experiment	16.5	25.5	24.5	13	1
253	1	1	Experiment	M	16	01Experiment	15	25.5	25.5	13	1
269	1	1	Experiment	M	17	01Experiment	17.5	25.5	26	13	1
285	1	1	Experiment	M	18	01Experiment	16.5	25.5	21	13	1
301	1	1	Experiment	M	19	01Experiment	14.5	25.5	20.5	13	1
317	1	1	Experiment	M	20	01Experiment	16.5	25.5	26.5	13	1
333	1	1	Experiment	M	21	01Experiment	17	25.5	23.5	13	1
349	1	1	Experiment	M	22	01Experiment	0	25.5	0	13	1
365	1	1	Experiment	M	23	01Experiment	17	25.5	25	13	1
381	1	1	Experiment	M	24	01Experiment	25.5	25.5	54.5	13	1
14	1	1	Experiment	N	1	01Experiment	2.5	27.5	24	14	1	X
30	1	1	Experiment	N	2	01Experiment	8.5	27.5	22	14	1
46	1	1	Experiment	N	3	01Experiment	12.5	27.5	22	14	1
62	1	1	Experiment	N	4	01Experiment	13.5	27.5	25.5	14	1
78	1	1	Experiment	N	5	01Experiment	21.5	27.5	29.5	14	1
94	1	1	Experiment	N	6	01Experiment	15.5	27.5	25.5	14	1
110	1	1	Experiment	N	7	01Experiment	15.5	27.5	23.5	14	1
126	1	1	Experiment	N	8	01Experiment	17	27.5	22.5	14	1
142	1	1	Experiment	N	9	01Experiment	18.5	27.5	34	14	1
158	1	1	Experiment	N	10	01Experiment	16.5	27.5	24.5	14	1
174	1	1	Experiment	N	11	01Experiment	23	27.5	44.5	14	1
190	1	1	Experiment	N	12	01Experiment	18	27.5	26.5	14	1
206	1	1	Experiment	N	13	01Experiment	17.5	27.5	19.5	14	1
222	1	1	Experiment	N	14	01Experiment	19	27.5	26.5	14	1
238	1	1	Experiment	N	15	01Experiment	18	27.5	22	14	1
254	1	1	Experiment	N	16	01Experiment	20.5	27.5	37	14	1
270	1	1	Experiment	N	17	01Experiment	15	27.5	25	14	1
286	1	1	Experiment	N	18	01Experiment	12	27.5	21.5	14	1
302	1	1	Experiment	N	19	01Experiment	13	27.5	23	14	1
318	1	1	Experiment	N	20	01Experiment	11.5	27.5	20.5	14	1
334	1	1	Experiment	N	21	01Experiment	11.5	27.5	23	14	1
350	1	1	Experiment	N	22	01Experiment	9.5	27.5	19.5	14	1
366	1	1	Experiment	N	23	01Experiment	13.5	27.5	22	14	1
382	1	1	Experiment	N	24	01Experiment	17.5	27.5	29	14	1
15	1	1	Experiment	O	1	01Experiment	4.5	29.5	24.5	15	1	X
31	1	1	Experiment	O	2	01Experiment	10.5	29.5	26	15	1
47	1	1	Experiment	O	3	01Experiment	13	29.5	23.5	15	1
63	1	1	Experiment	O	4	01Experiment	11	29.5	18	15	1
79	1	1	Experiment	O	5	01Experiment	14	29.5	22.5	15	1
95	1	1	Experiment	O	6	01Experiment	18	29.5	31.5	15	1
111	1	1	Experiment	O	7	01Experiment	17.5	29.5	33.5	15	1
127	1	1	Experiment	O	8	01Experiment	24	29.5	43	15	1
143	1	1	Experiment	O	9	01Experiment	9.5	29.5	24.5	15	1
159	1	1	Experiment	O	10	01Experiment	13.5	29.5	21.5	15	1
175	1	1	Experiment	O	11	01Experiment	20	29.5	30.5	15	1
191	1	1	Experiment	O	12	01Experiment	14	29.5	36	15	1
207	1	1	Experiment	O	13	01Experiment	16.5	29.5	30	15	1
223	1	1	Experiment	O	14	01Experiment	9.5	29.5	14	15	1
239	1	1	Experiment	O	15	01Experiment	13	29.5	19	15	1
255	1	1	Experiment	O	16	01Experiment	16	29.5	25.5	15	1
271	1	1	Experiment	O	17	01Experiment	21	29.5	39.5	15	1
287	1	1	Experiment	O	18	01Experiment	14	29.5	32.5	15	1
303	1	1	Experiment	O	19	01Experiment	13.5	29.5	27	15	1
319	1	1	Experiment	O	20	01Experiment	1	29.5	17.5	15	1
335	1	1	Experiment	O	21	01Experiment	5	29.5	19	15	1
351	1	1	Experiment	O	22	01Experiment	8.5	29.5	23.5	15	1
367	1	1	Experiment	O	23	01Experiment	4.5	29.5	14	15	1
383	1	1	Experiment	O	24	01Experiment	13.5	29.5	27	15	1
16	1	1	Experiment	P	1	01Experiment	20	31.5	48	16	1
32	1	1	Experiment	P	2	01Experiment	16.5	31.5	38	16	1
48	1	1	Experiment	P	3	01Experiment	20.5	31.5	38	16	1
64	1	1	Experiment	P	4	01Experiment	22	31.5	41.5	16	1
80	1	1	Experiment	P	5	01Experiment	15.5	31.5	35.5	16	1
96	1	1	Experiment	P	6	01Experiment	20.5	31.5	31.5	16	1
112	1	1	Experiment	P	7	01Experiment	17.5	31.5	32.5	16	1
128	1	1	Experiment	P	8	01Experiment	20	31.5	32	16	1
144	1	1	Experiment	P	9	01Experiment	6	31.5	18.5	16	1
160	1	1	Experiment	P	10	01Experiment	21.5	31.5	38.5	16	1
176	1	1	Experiment	P	11	01Experiment	20	31.5	37.5	16	1
192	1	1	Experiment	P	12	01Experiment	0	31.5	6.5	16	1
208	1	1	Experiment	P	13	01Experiment	0.5	31.5	26	16	1
224	1	1	Experiment	P	14	01Experiment	19	31.5	35	16	1
240	1	1	Experiment	P	15	01Experiment	23	31.5	45	16	1
256	1	1	Experiment	P	16	01Experiment	19.5	31.5	30	16	1
272	1	1	Experiment	P	17	01Experiment	19	31.5	36	16	1
288	1	1	Experiment	P	18	01Experiment	20	31.5	33	16	1
304	1	1	Experiment	P	19	01Experiment	13	31.5	33.5	16	1
320	1	1	Experiment	P	20	01Experiment	21	31.5	39.5	16	1
336	1	1	Experiment	P	21	01Experiment	27.5	31.5	52.5	16	1
352	1	1	Experiment	P	22	01Experiment	9	31.5	39.5	16	1
368	1	1	Experiment	P	23	01Experiment	2.5	31.5	19	16	1
384	1	1	Experiment	P	24	01Experiment	22	31.5	36	16	1
385	2	2	Experiment	A	1	02Experiment	20	1.5	90.5	1	5
401	2	2	Experiment	A	2	02Experiment	15	1.5	71	1	5
417	2	2	Experiment	A	3	02Experiment	13	1.5	71.5	1	5
433	2	2	Experiment	A	4	02Experiment	8.5	1.5	64.5	1	5
449	2	2	Experiment	A	5	02Experiment	23.5	1.5	83.5	1	5
465	2	2	Experiment	A	6	02Experiment	18.5	1.5	72	1	5
481	2	2	Experiment	A	7	02Experiment	22	1.5	81	1	5
497	2	2	Experiment	A	8	02Experiment	13	1.5	52.5	1	5
513	2	2	Experiment	A	9	02Experiment	12	1.5	69	1	5
529	2	2	Experiment	A	10	02Experiment	19	1.5	72	1	5
545	2	2	Experiment	A	11	02Experiment	20	1.5	71.5	1	5
561	2	2	Experiment	A	12	02Experiment	22	1.5	80.5	1	5
577	2	2	Experiment	A	13	02Experiment	19	1.5	71.5	1	5
593	2	2	Experiment	A	14	02Experiment	18	1.5	72	1	5
609	2	2	Experiment	A	15	02Experiment	20	1.5	72.5	1	5
625	2	2	Experiment	A	16	02Experiment	19.5	1.5	69	1	5
641	2	2	Experiment	A	17	02Experiment	19.5	1.5	74	1	5
657	2	2	Experiment	A	18	02Experiment	22.5	1.5	75	1	5
673	2	2	Experiment	A	19	02Experiment	16.5	1.5	68.5	1	5
689	2	2	Experiment	A	20	02Experiment	17	1.5	68.5	1	5
705	2	2	Experiment	A	21	02Experiment	18.5	1.5	73.5	1	5
721	2	2	Experiment	A	22	02Experiment	20.5	1.5	72.5	1	5
737	2	2	Experiment	A	23	02Experiment	18	1.5	69.5	1	5
753	2	2	Experiment	A	24	02Experiment	27.5	1.5	96	1	5
386	2	2	Experiment	B	1	02Experiment	9	3.5	57.5	2	5
402	2	2	Experiment	B	2	02Experiment	9	3.5	49.5	2	5
418	2	2	Experiment	B	3	02Experiment	19	3.5	57	2	5
434	2	2	Experiment	B	4	02Experiment	16.5	3.5	62.5	2	5
450	2	2	Experiment	B	5	02Experiment	19	3.5	52.5	2	5
466	2	2	Experiment	B	6	02Experiment	13.5	3.5	52	2	5
482	2	2	Experiment	B	7	02Experiment	13.5	3.5	58.5	2	5
498	2	2	Experiment	B	8	02Experiment	13.5	3.5	65.5	2	5
514	2	2	Experiment	B	9	02Experiment	10.5	3.5	40	2	5
530	2	2	Experiment	B	10	02Experiment	17.5	3.5	43	2	5
546	2	2	Experiment	B	11	02Experiment	19	3.5	54.5	2	5
562	2	2	Experiment	B	12	02Experiment	15	3.5	47	2	5
578	2	2	Experiment	B	13	02Experiment	21.5	3.5	64	2	5
594	2	2	Experiment	B	14	02Experiment	17	3.5	53	2	5
610	2	2	Experiment	B	15	02Experiment	19	3.5	60	2	5
626	2	2	Experiment	B	16	02Experiment	20	3.5	59	2	5
642	2	2	Experiment	B	17	02Experiment	14.5	3.5	44.5	2	5
658	2	2	Experiment	B	18	02Experiment	17	3.5	52.5	2	5
674	2	2	Experiment	B	19	02Experiment	16	3.5	57	2	5
690	2	2	Experiment	B	20	02Experiment	16.5	3.5	53	2	5
706	2	2	Experiment	B	21	02Experiment	19.5	3.5	51.5	2	5
722	2	2	Experiment	B	22	02Experiment	16.5	3.5	57	2	5
738	2	2	Experiment	B	23	02Experiment	16.5	3.5	55.5	2	5
754	2	2	Experiment	B	24	02Experiment	20	3.5	76	2	5
387	2	2	Experiment	C	1	02Experiment	19.5	5.5	71	3	5
403	2	2	Experiment	C	2	02Experiment	13	5.5	51	3	5
419	2	2	Experiment	C	3	02Experiment	15.5	5.5	39	3	5
435	2	2	Experiment	C	4	02Experiment	0	5.5	12.5	3	5
451	2	2	Experiment	C	5	02Experiment	19.5	5.5	71	3	5
467	2	2	Experiment	C	6	02Experiment	19	5.5	54	3	5
483	2	2	Experiment	C	7	02Experiment	17.5	5.5	37	3	5
499	2	2	Experiment	C	8	02Experiment	10	5.5	34	3	5
515	2	2	Experiment	C	9	02Experiment	11	5.5	59	3	5
531	2	2	Experiment	C	10	02Experiment	14.5	5.5	51	3	5
547	2	2	Experiment	C	11	02Experiment	15.5	5.5	49	3	5
563	2	2	Experiment	C	12	02Experiment	25	5.5	74	3	5
579	2	2	Experiment	C	13	02Experiment	16.5	5.5	52	3	5
595	2	2	Experiment	C	14	02Experiment	16	5.5	42.5	3	5
611	2	2	Experiment	C	15	02Experiment	9	5.5	49	3	5
627	2	2	Experiment	C	16	02Experiment	19	5.5	50.5	3	5
643	2	2	Experiment	C	17	02Experiment	17	5.5	50.5	3	5
659	2	2	Experiment	C	18	02Experiment	16.5	5.5	49	3	5
675	2	2	Experiment	C	19	02Experiment	11	5.5	40	3	5
691	2	2	Experiment	C	20	02Experiment	14	5.5	52	3	5
707	2	2	Experiment	C	21	02Experiment	15	5.5	41.5	3	5
723	2	2	Experiment	C	22	02Experiment	16	5.5	51.5	3	5
739	2	2	Experiment	C	23	02Experiment	10	5.5	41	3	5
755	2	2	Experiment	C	24	02Experiment	17	5.5	71	3	5
388	2	2	Experiment	D	1	02Experiment	18.5	7.5	76.5	4	5
404	2	2	Experiment	D	2	02Experiment	14.5	7.5	52.5	4	5
420	2	2	Experiment	D	3	02Experiment	13	7.5	51.5	4	5
436	2	2	Experiment	D	4	02Experiment	17	7.5	47	4	5
452	2	2	Experiment	D	5	02Experiment	11.5	7.5	41.5	4	5
468	2	2	Experiment	D	6	02Experiment	13	7.5	44.5	4	5
484	2	2	Experiment	D	7	02Experiment	17.5	7.5	44.5	4	5
500	2	2	Experiment	D	8	02Experiment	16.5	7.5	55	4	5
516	2	2	Experiment	D	9	02Experiment	8.5	7.5	36	4	5
532	2	2	Experiment	D	10	02Experiment	14	7.5	46	4	5
548	2	2	Experiment	D	11	02Experiment	15.5	7.5	49	4	5
564	2	2	Experiment	D	12	02Experiment	16.5	7.5	51.5	4	5
580	2	2	Experiment	D	13	02Experiment	10	7.5	38	4	5
596	2	2	Experiment	D	14	02Experiment	14.5	7.5	48.5	4	5
612	2	2	Experiment	D	15	02Experiment	15	7.5	49	4	5
628	2	2	Experiment	D	16	02Experiment	15	7.5	45.5	4	5
644	2	2	Experiment	D	17	02Experiment	14	7.5	46.5	4	5
660	2	2	Experiment	D	18	02Experiment	13	7.5	35	4	5
676	2	2	Experiment	D	19	02Experiment	17.5	7.5	53	4	5
692	2	2	Experiment	D	20	02Experiment	16.5	7.5	50	4	5
708	2	2	Experiment	D	21	02Experiment	6.5	7.5	33	4	5
724	2	2	Experiment	D	22	02Experiment	9.5	7.5	44.5	4	5
740	2	2	Experiment	D	23	02Experiment	17	7.5	61	4	5
756	2	2	Experiment	D	24	02Experiment	19	7.5	69.5	4	5
389	2	2	Experiment	E	1	02Experiment	18.5	9.5	58.5	5	5
405	2	2	Experiment	E	2	02Experiment	16	9.5	50.5	5	5
421	2	2	Experiment	E	3	02Experiment	13.5	9.5	44.5	5	5
437	2	2	Experiment	E	4	02Experiment	5	9.5	21.5	5	5
453	2	2	Experiment	E	5	02Experiment	7.5	9.5	41.5	5	5
469	2	2	Experiment	E	6	02Experiment	18.5	9.5	59	5	5
485	2	2	Experiment	E	7	02Experiment	13.5	9.5	42.5	5	5
501	2	2	Experiment	E	8	02Experiment	10.5	9.5	40	5	5
517	2	2	Experiment	E	9	02Experiment	10	9.5	40.5	5	5
533	2	2	Experiment	E	10	02Experiment	12	9.5	52.5	5	5
549	2	2	Experiment	E	11	02Experiment	12	9.5	60.5	5	5
565	2	2	Experiment	E	12	02Experiment	15	9.5	47.5	5	5
581	2	2	Experiment	E	13	02Experiment	16	9.5	40.5	5	5
597	2	2	Experiment	E	14	02Experiment	13	9.5	42.5	5	5
613	2	2	Experiment	E	15	02Experiment	11	9.5	32	5	5
629	2	2	Experiment	E	16	02Experiment	16	9.5	51	5	5
645	2	2	Experiment	E	17	02Experiment	13.5	9.5	41	5	5
661	2	2	Experiment	E	18	02Experiment	12.5	9.5	46	5	5
677	2	2	Experiment	E	19	02Experiment	13.5	9.5	45	5	5
693	2	2	Experiment	E	20	02Experiment	12.5	9.5	48	5	5
709	2	2	Experiment	E	21	02Experiment	10	9.5	26.5	5	5
725	2	2	Experiment	E	22	02Experiment	9	9.5	42	5	5
741	2	2	Experiment	E	23	02Experiment	14	9.5	76	5	5
757	2	2	Experiment	E	24	02Experiment	7.5	9.5	52.5	5	5
390	2	2	Experiment	F	1	02Experiment	18.5	11.5	66.5	6	5
406	2	2	Experiment	F	2	02Experiment	12	11.5	44.5	6	5
422	2	2	Experiment	F	3	02Experiment	11.5	11.5	40.5	6	5
438	2	2	Experiment	F	4	02Experiment	12	11.5	38	6	5
454	2	2	Experiment	F	5	02Experiment	11.5	11.5	41	6	5
470	2	2	Experiment	F	6	02Experiment	12	11.5	46.5	6	5
486	2	2	Experiment	F	7	02Experiment	11.5	11.5	41.5	6	5
502	2	2	Experiment	F	8	02Experiment	11	11.5	42	6	5
518	2	2	Experiment	F	9	02Experiment	0	11.5	8	6	5
534	2	2	Experiment	F	10	02Experiment	5.5	11.5	31.5	6	5
550	2	2	Experiment	F	11	02Experiment	12	11.5	52.5	6	5
566	2	2	Experiment	F	12	02Experiment	11	11.5	40	6	5
582	2	2	Experiment	F	13	02Experiment	18	11.5	62.5	6	5
598	2	2	Experiment	F	14	02Experiment	13	11.5	48	6	5
614	2	2	Experiment	F	15	02Experiment	13	11.5	49.5	6	5
630	2	2	Experiment	F	16	02Experiment	8.5	11.5	45.5	6	5
646	2	2	Experiment	F	17	02Experiment	10.5	11.5	47	6	5
662	2	2	Experiment	F	18	02Experiment	13	11.5	46.5	6	5
678	2	2	Experiment	F	19	02Experiment	13.5	11.5	50.5	6	5
694	2	2	Experiment	F	20	02Experiment	14	11.5	45	6	5
710	2	2	Experiment	F	21	02Experiment	12	11.5	45.5	6	5
726	2	2	Experiment	F	22	02Experiment	14	11.5	56	6	5
742	2	2	Experiment	F	23	02Experiment	11	11.5	37	6	5
758	2	2	Experiment	F	24	02Experiment	17.5	11.5	72	6	5
391	2	2	Experiment	G	1	02Experiment	7	13.5	53.5	7	5
407	2	2	Experiment	G	2	02Experiment	10.5	13.5	43	7	5
423	2	2	Experiment	G	3	02Experiment	6	13.5	44	7	5
439	2	2	Experiment	G	4	02Experiment	13	13.5	46	7	5
455	2	2	Experiment	G	5	02Experiment	12	13.5	40	7	5
471	2	2	Experiment	G	6	02Experiment	10	13.5	46	7	5
487	2	2	Experiment	G	7	02Experiment	11.5	13.5	45.5	7	5
503	2	2	Experiment	G	8	02Experiment	11.5	13.5	46	7	5
519	2	2	Experiment	G	9	02Experiment	10	13.5	45	7	5
535	2	2	Experiment	G	10	02Experiment	10.5	13.5	40.5	7	5
551	2	2	Experiment	G	11	02Experiment	3	13.5	26	7	5
567	2	2	Experiment	G	12	02Experiment	11.5	13.5	48	7	5
583	2	2	Experiment	G	13	02Experiment	14.5	13.5	51.5	7	5
599	2	2	Experiment	G	14	02Experiment	9	13.5	38	7	5
615	2	2	Experiment	G	15	02Experiment	10	13.5	44	7	5
631	2	2	Experiment	G	16	02Experiment	11.5	13.5	46.5	7	5
647	2	2	Experiment	G	17	02Experiment	11.5	13.5	48	7	5
663	2	2	Experiment	G	18	02Experiment	13.5	13.5	46.5	7	5
679	2	2	Experiment	G	19	02Experiment	11.5	13.5	50	7	5
695	2	2	Experiment	G	20	02Experiment	13	13.5	45.5	7	5
711	2	2	Experiment	G	21	02Experiment	0	13.5	0	7	5
727	2	2	Experiment	G	22	02Experiment	11.5	13.5	46	7	5
743	2	2	Experiment	G	23	02Experiment	14	13.5	60.5	7	5
759	2	2	Experiment	G	24	02Experiment	12	13.5	57	7	5
392	2	2	Experiment	H	1	02Experiment	16	15.5	70.5	8	5
408	2	2	Experiment	H	2	02Experiment	8	15.5	50.5	8	5
424	2	2	Experiment	H	3	02Experiment	12	15.5	43	8	5
440	2	2	Experiment	H	4	02Experiment	9	15.5	32	8	5
456	2	2	Experiment	H	5	02Experiment	10.5	15.5	42.5	8	5
472	2	2	Experiment	H	6	02Experiment	8.5	15.5	37	8	5
488	2	2	Experiment	H	7	02Experiment	11.5	15.5	44	8	5
504	2	2	Experiment	H	8	02Experiment	12.5	15.5	44	8	5
520	2	2	Experiment	H	9	02Experiment	12.5	15.5	44	8	5
536	2	2	Experiment	H	10	02Experiment	9.5	15.5	36.5	8	5
552	2	2	Experiment	H	11	02Experiment	13	15.5	42.5	8	5
568	2	2	Experiment	H	12	02Experiment	11	15.5	46.5	8	5
584	2	2	Experiment	H	13	02Experiment	13.5	15.5	31	8	5
600	2	2	Experiment	H	14	02Experiment	12	15.5	52.5	8	5
616	2	2	Experiment	H	15	02Experiment	8.5	15.5	34.5	8	5
632	2	2	Experiment	H	16	02Experiment	10.5	15.5	42.5	8	5
648	2	2	Experiment	H	17	02Experiment	10	15.5	41	8	5
664	2	2	Experiment	H	18	02Experiment	10	15.5	37.5	8	5
680	2	2	Experiment	H	19	02Experiment	11.5	15.5	46	8	5
696	2	2	Experiment	H	20	02Experiment	10	15.5	43	8	5
712	2	2	Experiment	H	21	02Experiment	16	15.5	53	8	5
728	2	2	Experiment	H	22	02Experiment	11	15.5	43.5	8	5
744	2	2	Experiment	H	23	02Experiment	10.5	15.5	46.5	8	5
760	2	2	Experiment	H	24	02Experiment	13.5	15.5	65.5	8	5
393	2	2	Experiment	I	1	02Experiment	12.5	17.5	61	9	5
409	2	2	Experiment	I	2	02Experiment	9	17.5	40.5	9	5
425	2	2	Experiment	I	3	02Experiment	7	17.5	39	9	5
441	2	2	Experiment	I	4	02Experiment	10	17.5	40	9	5
457	2	2	Experiment	I	5	02Experiment	7.5	17.5	29.5	9	5
473	2	2	Experiment	I	6	02Experiment	10.5	17.5	42.5	9	5
489	2	2	Experiment	I	7	02Experiment	13.5	17.5	49.5	9	5
505	2	2	Experiment	I	8	02Experiment	10	17.5	41.5	9	5
521	2	2	Experiment	I	9	02Experiment	14	17.5	52	9	5
537	2	2	Experiment	I	10	02Experiment	9	17.5	51	9	5
553	2	2	Experiment	I	11	02Experiment	10	17.5	32	9	5
569	2	2	Experiment	I	12	02Experiment	10.5	17.5	40	9	5
585	2	2	Experiment	I	13	02Experiment	12	17.5	31.5	9	5
601	2	2	Experiment	I	14	02Experiment	10	17.5	39.5	9	5
617	2	2	Experiment	I	15	02Experiment	4	17.5	29.5	9	5
633	2	2	Experiment	I	16	02Experiment	11	17.5	39.5	9	5
649	2	2	Experiment	I	17	02Experiment	8.5	17.5	43.5	9	5
665	2	2	Experiment	I	18	02Experiment	9.5	17.5	38.5	9	5
681	2	2	Experiment	I	19	02Experiment	15	17.5	50	9	5
697	2	2	Experiment	I	20	02Experiment	8.5	17.5	41	9	5
713	2	2	Experiment	I	21	02Experiment	9	17.5	34.5	9	5
729	2	2	Experiment	I	22	02Experiment	10	17.5	43.5	9	5
745	2	2	Experiment	I	23	02Experiment	0	17.5	13.5	9	5
761	2	2	Experiment	I	24	02Experiment	11.5	17.5	60.5	9	5
394	2	2	Experiment	J	1	02Experiment	15	19.5	62	10	5
410	2	2	Experiment	J	2	02Experiment	8.5	19.5	40.5	10	5
426	2	2	Experiment	J	3	02Experiment	19.5	19.5	54.5	10	5
442	2	2	Experiment	J	4	02Experiment	9.5	19.5	38	10	5
458	2	2	Experiment	J	5	02Experiment	8	19.5	34.5	10	5
474	2	2	Experiment	J	6	02Experiment	10	19.5	35.5	10	5
490	2	2	Experiment	J	7	02Experiment	13	19.5	49.5	10	5
506	2	2	Experiment	J	8	02Experiment	8.5	19.5	37	10	5
522	2	2	Experiment	J	9	02Experiment	9	19.5	39	10	5
538	2	2	Experiment	J	10	02Experiment	7	19.5	32	10	5
554	2	2	Experiment	J	11	02Experiment	12	19.5	42	10	5
570	2	2	Experiment	J	12	02Experiment	7	19.5	37	10	5
586	2	2	Experiment	J	13	02Experiment	11	19.5	46	10	5
602	2	2	Experiment	J	14	02Experiment	10.5	19.5	46	10	5
618	2	2	Experiment	J	15	02Experiment	8.5	19.5	47.5	10	5
634	2	2	Experiment	J	16	02Experiment	11	19.5	43	10	5
650	2	2	Experiment	J	17	02Experiment	9	19.5	40.5	10	5
666	2	2	Experiment	J	18	02Experiment	12	19.5	45.5	10	5
682	2	2	Experiment	J	19	02Experiment	10	19.5	67.5	10	5
698	2	2	Experiment	J	20	02Experiment	0	19.5	3	10	5
714	2	2	Experiment	J	21	02Experiment	8.5	19.5	0	10	5
730	2	2	Experiment	J	22	02Experiment	10	19.5	45	10	5
746	2	2	Experiment	J	23	02Experiment	8.5	19.5	47	10	5
762	2	2	Experiment	J	24	02Experiment	13.5	19.5	64	10	5
395	2	2	Experiment	K	1	02Experiment	11.5	21.5	56.5	11	5
411	2	2	Experiment	K	2	02Experiment	9	21.5	39	11	5
427	2	2	Experiment	K	3	02Experiment	7	21.5	37.5	11	5
443	2	2	Experiment	K	4	02Experiment	8	21.5	32	11	5
459	2	2	Experiment	K	5	02Experiment	8.5	21.5	41	11	5
475	2	2	Experiment	K	6	02Experiment	10	21.5	39.5	11	5
491	2	2	Experiment	K	7	02Experiment	7.5	21.5	41.5	11	5
507	2	2	Experiment	K	8	02Experiment	9	21.5	40	11	5
523	2	2	Experiment	K	9	02Experiment	11	21.5	42.5	11	5
539	2	2	Experiment	K	10	02Experiment	10	21.5	39.5	11	5
555	2	2	Experiment	K	11	02Experiment	7.5	21.5	37	11	5
571	2	2	Experiment	K	12	02Experiment	7.5	21.5	34.5	11	5
587	2	2	Experiment	K	13	02Experiment	7	21.5	31.5	11	5
603	2	2	Experiment	K	14	02Experiment	8.5	21.5	30.5	11	5
619	2	2	Experiment	K	15	02Experiment	9.5	21.5	39.5	11	5
635	2	2	Experiment	K	16	02Experiment	11.5	21.5	42.5	11	5
651	2	2	Experiment	K	17	02Experiment	4	21.5	21	11	5
667	2	2	Experiment	K	18	02Experiment	10	21.5	41.5	11	5
683	2	2	Experiment	K	19	02Experiment	6.5	21.5	38	11	5
699	2	2	Experiment	K	20	02Experiment	11	21.5	43.5	11	5
715	2	2	Experiment	K	21	02Experiment	7.5	21.5	39	11	5
731	2	2	Experiment	K	22	02Experiment	10	21.5	46.5	11	5
747	2	2	Experiment	K	23	02Experiment	9	21.5	43	11	5
763	2	2	Experiment	K	24	02Experiment	13	21.5	53.5	11	5
396	2	2	Experiment	L	1	02Experiment	14	23.5	59.5	12	5
412	2	2	Experiment	L	2	02Experiment	8	23.5	38	12	5
428	2	2	Experiment	L	3	02Experiment	2	23.5	25.5	12	5
444	2	2	Experiment	L	4	02Experiment	10	23.5	37	12	5
460	2	2	Experiment	L	5	02Experiment	7.5	23.5	35	12	5
476	2	2	Experiment	L	6	02Experiment	7.5	23.5	32	12	5
492	2	2	Experiment	L	7	02Experiment	7.5	23.5	34.5	12	5
508	2	2	Experiment	L	8	02Experiment	7.5	23.5	36	12	5
524	2	2	Experiment	L	9	02Experiment	8	23.5	29	12	5
540	2	2	Experiment	L	10	02Experiment	8	23.5	41	12	5
556	2	2	Experiment	L	11	02Experiment	3	23.5	20.5	12	5
572	2	2	Experiment	L	12	02Experiment	9	23.5	41.5	12	5
588	2	2	Experiment	L	13	02Experiment	1	23.5	19	12	5
604	2	2	Experiment	L	14	02Experiment	2.5	23.5	37.5	12	5
620	2	2	Experiment	L	15	02Experiment	9.5	23.5	41.5	12	5
636	2	2	Experiment	L	16	02Experiment	0	23.5	1	12	5
652	2	2	Experiment	L	17	02Experiment	9	23.5	44	12	5
668	2	2	Experiment	L	18	02Experiment	0	23.5	18.5	12	5
684	2	2	Experiment	L	19	02Experiment	11	23.5	46	12	5
700	2	2	Experiment	L	20	02Experiment	0	23.5	3.5	12	5
716	2	2	Experiment	L	21	02Experiment	7	23.5	47	12	5
732	2	2	Experiment	L	22	02Experiment	0	23.5	0	12	5
748	2	2	Experiment	L	23	02Experiment	4	23.5	35.5	12	5
764	2	2	Experiment	L	24	02Experiment	11.5	23.5	62.5	12	5
397	2	2	Experiment	M	1	02Experiment	8.5	25.5	53.5	13	5
413	2	2	Experiment	M	2	02Experiment	9	25.5	40	13	5
429	2	2	Experiment	M	3	02Experiment	9	25.5	37.5	13	5
445	2	2	Experiment	M	4	02Experiment	6	25.5	32	13	5
461	2	2	Experiment	M	5	02Experiment	9	25.5	34	13	5
477	2	2	Experiment	M	6	02Experiment	7	25.5	30	13	5
493	2	2	Experiment	M	7	02Experiment	8.5	25.5	31	13	5
509	2	2	Experiment	M	8	02Experiment	13	25.5	47.5	13	5
525	2	2	Experiment	M	9	02Experiment	6	25.5	33.5	13	5
541	2	2	Experiment	M	10	02Experiment	6.5	25.5	33	13	5
557	2	2	Experiment	M	11	02Experiment	13.5	25.5	56	13	5
573	2	2	Experiment	M	12	02Experiment	12.5	25.5	51	13	5
589	2	2	Experiment	M	13	02Experiment	7.5	25.5	36	13	5
605	2	2	Experiment	M	14	02Experiment	8.5	25.5	42	13	5
621	2	2	Experiment	M	15	02Experiment	8.5	25.5	40.5	13	5
637	2	2	Experiment	M	16	02Experiment	7.5	25.5	39.5	13	5
653	2	2	Experiment	M	17	02Experiment	6	25.5	35	13	5
669	2	2	Experiment	M	18	02Experiment	6	25.5	33	13	5
685	2	2	Experiment	M	19	02Experiment	5	25.5	34.5	13	5
701	2	2	Experiment	M	20	02Experiment	9.5	25.5	40	13	5
717	2	2	Experiment	M	21	02Experiment	7	25.5	41.5	13	5
733	2	2	Experiment	M	22	02Experiment	0	25.5	0	13	5
749	2	2	Experiment	M	23	02Experiment	8	25.5	46	13	5
765	2	2	Experiment	M	24	02Experiment	11.5	25.5	60	13	5
398	2	2	Experiment	N	1	02Experiment	7.5	27.5	55.5	14	5
414	2	2	Experiment	N	2	02Experiment	6	27.5	31	14	5
430	2	2	Experiment	N	3	02Experiment	7.5	27.5	33.5	14	5
446	2	2	Experiment	N	4	02Experiment	5.5	27.5	34	14	5
462	2	2	Experiment	N	5	02Experiment	10.5	27.5	43	14	5
478	2	2	Experiment	N	6	02Experiment	7	27.5	32	14	5
494	2	2	Experiment	N	7	02Experiment	6.5	27.5	33.5	14	5
510	2	2	Experiment	N	8	02Experiment	6.5	27.5	32.5	14	5
526	2	2	Experiment	N	9	02Experiment	8	27.5	43	14	5
542	2	2	Experiment	N	10	02Experiment	5.5	27.5	32	14	5
558	2	2	Experiment	N	11	02Experiment	8.5	27.5	47	14	5
574	2	2	Experiment	N	12	02Experiment	8	27.5	38.5	14	5
590	2	2	Experiment	N	13	02Experiment	0	27.5	15.5	14	5
606	2	2	Experiment	N	14	02Experiment	6.5	27.5	37.5	14	5
622	2	2	Experiment	N	15	02Experiment	8.5	27.5	39.5	14	5
638	2	2	Experiment	N	16	02Experiment	6	27.5	43	14	5
654	2	2	Experiment	N	17	02Experiment	7	27.5	35	14	5
670	2	2	Experiment	N	18	02Experiment	8	27.5	37.5	14	5
686	2	2	Experiment	N	19	02Experiment	7.5	27.5	35	14	5
702	2	2	Experiment	N	20	02Experiment	9.5	27.5	39	14	5
718	2	2	Experiment	N	21	02Experiment	7	27.5	40.5	14	5
734	2	2	Experiment	N	22	02Experiment	11	27.5	40.5	14	5
750	2	2	Experiment	N	23	02Experiment	7.5	27.5	41.5	14	5
766	2	2	Experiment	N	24	02Experiment	10	27.5	56.5	14	5
399	2	2	Experiment	O	1	02Experiment	8	29.5	37.5	15	5
415	2	2	Experiment	O	2	02Experiment	8.5	29.5	38.5	15	5
431	2	2	Experiment	O	3	02Experiment	9	29.5	37.5	15	5
447	2	2	Experiment	O	4	02Experiment	4	29.5	33.5	15	5
463	2	2	Experiment	O	5	02Experiment	4	29.5	32.5	15	5
479	2	2	Experiment	O	6	02Experiment	6	29.5	27.5	15	5
495	2	2	Experiment	O	7	02Experiment	5.5	29.5	48.5	15	5
511	2	2	Experiment	O	8	02Experiment	13	29.5	56	15	5
527	2	2	Experiment	O	9	02Experiment	12	29.5	48	15	5
543	2	2	Experiment	O	10	02Experiment	6	29.5	43	15	5
559	2	2	Experiment	O	11	02Experiment	8	29.5	45.5	15	5
575	2	2	Experiment	O	12	02Experiment	6	29.5	50	15	5
591	2	2	Experiment	O	13	02Experiment	7.5	29.5	46.5	15	5
607	2	2	Experiment	O	14	02Experiment	5	29.5	43	15	5
623	2	2	Experiment	O	15	02Experiment	4.5	29.5	37.5	15	5
639	2	2	Experiment	O	16	02Experiment	6	29.5	42.5	15	5
655	2	2	Experiment	O	17	02Experiment	11	29.5	50.5	15	5
671	2	2	Experiment	O	18	02Experiment	5.5	29.5	48	15	5
687	2	2	Experiment	O	19	02Experiment	7	29.5	38	15	5
703	2	2	Experiment	O	20	02Experiment	8.5	29.5	42	15	5
719	2	2	Experiment	O	21	02Experiment	7	29.5	36.5	15	5
735	2	2	Experiment	O	22	02Experiment	10	29.5	40	15	5
751	2	2	Experiment	O	23	02Experiment	8	29.5	22	15	5
767	2	2	Experiment	O	24	02Experiment	11.5	29.5	59	15	5
400	2	2	Experiment	P	1	02Experiment	15	31.5	86	16	5
416	2	2	Experiment	P	2	02Experiment	9.5	31.5	63	16	5
432	2	2	Experiment	P	3	02Experiment	11	31.5	62.5	16	5
448	2	2	Experiment	P	4	02Experiment	11	31.5	58	16	5
464	2	2	Experiment	P	5	02Experiment	4.5	31.5	56.5	16	5
480	2	2	Experiment	P	6	02Experiment	10.5	31.5	55.5	16	5
496	2	2	Experiment	P	7	02Experiment	9	31.5	55.5	16	5
512	2	2	Experiment	P	8	02Experiment	8.5	31.5	56	16	5
528	2	2	Experiment	P	9	02Experiment	0	31.5	22	16	5
544	2	2	Experiment	P	10	02Experiment	11.5	31.5	64.5	16	5
560	2	2	Experiment	P	11	02Experiment	9.5	31.5	68.5	16	5
576	2	2	Experiment	P	12	02Experiment	13.5	31.5	0	16	5
592	2	2	Experiment	P	13	02Experiment	0	31.5	14	16	5
608	2	2	Experiment	P	14	02Experiment	10	31.5	65	16	5
624	2	2	Experiment	P	15	02Experiment	16	31.5	59.5	16	5
640	2	2	Experiment	P	16	02Experiment	13	31.5	64.5	16	5
656	2	2	Experiment	P	17	02Experiment	10.5	31.5	63	16	5
672	2	2	Experiment	P	18	02Experiment	14	31.5	63.5	16	5
688	2	2	Experiment	P	19	02Experiment	0	31.5	34.5	16	5
704	2	2	Experiment	P	20	02Experiment	10.5	31.5	62	16	5
720	2	2	Experiment	P	21	02Experiment	13.5	31.5	68	16	5
736	2	2	Experiment	P	22	02Experiment	11.5	31.5	69	16	5
752	2	2	Experiment	P	23	02Experiment	1	31.5	37	16	5
768	2	2	Experiment	P	24	02Experiment	13.5	31.5	82	16	5
769	1	3	Experiment	A	1	03Experiment	54	1.5	49.5	1	2
785	1	3	Experiment	A	2	03Experiment	27	1.5	39.5	1	2
801	1	3	Experiment	A	3	03Experiment	39.5	1.5	44	1	2
817	1	3	Experiment	A	4	03Experiment	30.5	1.5	39.5	1	2
833	1	3	Experiment	A	5	03Experiment	55.5	1.5	73.5	1	2
849	1	3	Experiment	A	6	03Experiment	50	1.5	47	1	2
865	1	3	Experiment	A	7	03Experiment	47.5	1.5	68.5	1	2
881	1	3	Experiment	A	8	03Experiment	37	1.5	28.5	1	2
897	1	3	Experiment	A	9	03Experiment	43	1.5	34	1	2
913	1	3	Experiment	A	10	03Experiment	46.5	1.5	42	1	2
929	1	3	Experiment	A	11	03Experiment	44.5	1.5	44.5	1	2
945	1	3	Experiment	A	12	03Experiment	46.5	1.5	65.5	1	2
961	1	3	Experiment	A	13	03Experiment	44.5	1.5	42.5	1	2
977	1	3	Experiment	A	14	03Experiment	44	1.5	42.5	1	2
993	1	3	Experiment	A	15	03Experiment	46	1.5	42.5	1	2
1009	1	3	Experiment	A	16	03Experiment	61	1.5	52.5	1	2
1025	1	3	Experiment	A	17	03Experiment	41.5	1.5	49.5	1	2
1041	1	3	Experiment	A	18	03Experiment	51	1.5	58.5	1	2
1057	1	3	Experiment	A	19	03Experiment	38.5	1.5	47	1	2
1073	1	3	Experiment	A	20	03Experiment	36.5	1.5	33.5	1	2
1089	1	3	Experiment	A	21	03Experiment	34	1.5	44	1	2
1105	1	3	Experiment	A	22	03Experiment	29	1.5	44.5	1	2
1121	1	3	Experiment	A	23	03Experiment	25	1.5	39	1	2
1137	1	3	Experiment	A	24	03Experiment	39.5	1.5	64	1	2
770	1	3	Experiment	B	1	03Experiment	41.5	3.5	0	2	2
786	1	3	Experiment	B	2	03Experiment	38.5	3.5	29	2	2
802	1	3	Experiment	B	3	03Experiment	42	3.5	40	2	2
818	1	3	Experiment	B	4	03Experiment	40.5	3.5	53	2	2
834	1	3	Experiment	B	5	03Experiment	41	3.5	35	2	2
850	1	3	Experiment	B	6	03Experiment	38.5	3.5	38.5	2	2
866	1	3	Experiment	B	7	03Experiment	41	3.5	41.5	2	2
882	1	3	Experiment	B	8	03Experiment	42.5	3.5	45.5	2	2
898	1	3	Experiment	B	9	03Experiment	42	3.5	24	2	2
914	1	3	Experiment	B	10	03Experiment	55.5	3.5	23.5	2	2
930	1	3	Experiment	B	11	03Experiment	41	3.5	41	2	2
946	1	3	Experiment	B	12	03Experiment	41	3.5	37	2	2
962	1	3	Experiment	B	13	03Experiment	47.5	3.5	53	2	2
978	1	3	Experiment	B	14	03Experiment	43.5	3.5	42.5	2	2
994	1	3	Experiment	B	15	03Experiment	41	3.5	42.5	2	2
1010	1	3	Experiment	B	16	03Experiment	40	3.5	39.5	2	2
1026	1	3	Experiment	B	17	03Experiment	39	3.5	31.5	2	2
1042	1	3	Experiment	B	18	03Experiment	36	3.5	32.5	2	2
1058	1	3	Experiment	B	19	03Experiment	33	3.5	43	2	2
1074	1	3	Experiment	B	20	03Experiment	33	3.5	28	2	2
1090	1	3	Experiment	B	21	03Experiment	33.5	3.5	38	2	2
1106	1	3	Experiment	B	22	03Experiment	28	3.5	28	2	2
1122	1	3	Experiment	B	23	03Experiment	28	3.5	35	2	2
1138	1	3	Experiment	B	24	03Experiment	36	3.5	40.5	2	2
771	1	3	Experiment	C	1	03Experiment	42	5.5	0	3	2
787	1	3	Experiment	C	2	03Experiment	32.5	5.5	0	3	2
803	1	3	Experiment	C	3	03Experiment	41.5	5.5	23	3	2
819	1	3	Experiment	C	4	03Experiment	32.5	5.5	35	3	2
835	1	3	Experiment	C	5	03Experiment	61.5	5.5	88.5	3	2
851	1	3	Experiment	C	6	03Experiment	40.5	5.5	46.5	3	2
867	1	3	Experiment	C	7	03Experiment	30	5.5	31.5	3	2
883	1	3	Experiment	C	8	03Experiment	35	5.5	28.5	3	2
899	1	3	Experiment	C	9	03Experiment	52	5.5	59	3	2
915	1	3	Experiment	C	10	03Experiment	34.5	5.5	35.5	3	2
931	1	3	Experiment	C	11	03Experiment	38.5	5.5	40.5	3	2
947	1	3	Experiment	C	12	03Experiment	59	5.5	80	3	2
963	1	3	Experiment	C	13	03Experiment	37.5	5.5	32	3	2
979	1	3	Experiment	C	14	03Experiment	41	5.5	25.5	3	2
995	1	3	Experiment	C	15	03Experiment	37	5.5	44	3	2
1011	1	3	Experiment	C	16	03Experiment	42	5.5	35.5	3	2
1027	1	3	Experiment	C	17	03Experiment	36.5	5.5	35.5	3	2
1043	1	3	Experiment	C	18	03Experiment	43	5.5	35	3	2
1059	1	3	Experiment	C	19	03Experiment	24.5	5.5	26	3	2
1075	1	3	Experiment	C	20	03Experiment	36	5.5	46	3	2
1091	1	3	Experiment	C	21	03Experiment	28.5	5.5	34.5	3	2
1107	1	3	Experiment	C	22	03Experiment	25	5.5	33.5	3	2
1123	1	3	Experiment	C	23	03Experiment	22	5.5	19	3	2
1139	1	3	Experiment	C	24	03Experiment	35	5.5	47	3	2
772	1	3	Experiment	D	1	03Experiment	41	7.5	0	4	2
788	1	3	Experiment	D	2	03Experiment	40	7.5	0	4	2
804	1	3	Experiment	D	3	03Experiment	38	7.5	41	4	2
820	1	3	Experiment	D	4	03Experiment	32.5	7.5	37	4	2
836	1	3	Experiment	D	5	03Experiment	28.5	7.5	30.5	4	2
852	1	3	Experiment	D	6	03Experiment	43	7.5	37.5	4	2
868	1	3	Experiment	D	7	03Experiment	38.5	7.5	40.5	4	2
884	1	3	Experiment	D	8	03Experiment	37	7.5	34.5	4	2
900	1	3	Experiment	D	9	03Experiment	31	7.5	35.5	4	2
916	1	3	Experiment	D	10	03Experiment	35.5	7.5	43.5	4	2
932	1	3	Experiment	D	11	03Experiment	37.5	7.5	35.5	4	2
948	1	3	Experiment	D	12	03Experiment	34.5	7.5	41.5	4	2
964	1	3	Experiment	D	13	03Experiment	29	7.5	42	4	2
980	1	3	Experiment	D	14	03Experiment	37	7.5	32.5	4	2
996	1	3	Experiment	D	15	03Experiment	34	7.5	34	4	2
1012	1	3	Experiment	D	16	03Experiment	37.5	7.5	33	4	2
1028	1	3	Experiment	D	17	03Experiment	37.5	7.5	38.5	4	2
1044	1	3	Experiment	D	18	03Experiment	36	7.5	41.5	4	2
1060	1	3	Experiment	D	19	03Experiment	35.5	7.5	48.5	4	2
1076	1	3	Experiment	D	20	03Experiment	36	7.5	37.5	4	2
1092	1	3	Experiment	D	21	03Experiment	1.5	7.5	35.5	4	2
1108	1	3	Experiment	D	22	03Experiment	31.5	7.5	57.5	4	2
1124	1	3	Experiment	D	23	03Experiment	31	7.5	42.5	4	2
1140	1	3	Experiment	D	24	03Experiment	35.5	7.5	39	4	2
773	1	3	Experiment	E	1	03Experiment	46	9.5	0	5	2
789	1	3	Experiment	E	2	03Experiment	36.5	9.5	0	5	2
805	1	3	Experiment	E	3	03Experiment	35	9.5	29.5	5	2
821	1	3	Experiment	E	4	03Experiment	20.5	9.5	20.5	5	2
837	1	3	Experiment	E	5	03Experiment	22.5	9.5	47	5	2
853	1	3	Experiment	E	6	03Experiment	49	9.5	58.5	5	2
869	1	3	Experiment	E	7	03Experiment	29	9.5	32	5	2
885	1	3	Experiment	E	8	03Experiment	43	9.5	25	5	2
901	1	3	Experiment	E	9	03Experiment	32.5	9.5	26.5	5	2
917	1	3	Experiment	E	10	03Experiment	37	9.5	31	5	2
933	1	3	Experiment	E	11	03Experiment	36.5	9.5	62.5	5	2
949	1	3	Experiment	E	12	03Experiment	35.5	9.5	41.5	5	2
965	1	3	Experiment	E	13	03Experiment	26	9.5	34.5	5	2
981	1	3	Experiment	E	14	03Experiment	34	9.5	31.5	5	2
997	1	3	Experiment	E	15	03Experiment	26	9.5	22	5	2
1013	1	3	Experiment	E	16	03Experiment	40	9.5	42	5	2
1029	1	3	Experiment	E	17	03Experiment	27	9.5	41.5	5	2
1045	1	3	Experiment	E	18	03Experiment	32	9.5	37	5	2
1061	1	3	Experiment	E	19	03Experiment	33.5	9.5	37	5	2
1077	1	3	Experiment	E	20	03Experiment	30	9.5	32	5	2
1093	1	3	Experiment	E	21	03Experiment	36	9.5	21.5	5	2
1109	1	3	Experiment	E	22	03Experiment	20	9.5	39	5	2
1125	1	3	Experiment	E	23	03Experiment	39.5	9.5	62	5	2
1141	1	3	Experiment	E	24	03Experiment	36	9.5	48.5	5	2
774	1	3	Experiment	F	1	03Experiment	35.5	11.5	26	6	2
790	1	3	Experiment	F	2	03Experiment	33	11.5	34	6	2
806	1	3	Experiment	F	3	03Experiment	29.5	11.5	32.5	6	2
822	1	3	Experiment	F	4	03Experiment	34	11.5	35.5	6	2
838	1	3	Experiment	F	5	03Experiment	34.5	11.5	36	6	2
854	1	3	Experiment	F	6	03Experiment	30.5	11.5	33	6	2
870	1	3	Experiment	F	7	03Experiment	36	11.5	35.5	6	2
886	1	3	Experiment	F	8	03Experiment	21	11.5	27.5	6	2
902	1	3	Experiment	F	9	03Experiment	5.5	11.5	8	6	2
918	1	3	Experiment	F	10	03Experiment	10.5	11.5	11.5	6	2
934	1	3	Experiment	F	11	03Experiment	34.5	11.5	38	6	2
950	1	3	Experiment	F	12	03Experiment	31	11.5	29.5	6	2
966	1	3	Experiment	F	13	03Experiment	52.5	11.5	78	6	2
982	1	3	Experiment	F	14	03Experiment	36	11.5	35.5	6	2
998	1	3	Experiment	F	15	03Experiment	35	11.5	34	6	2
1014	1	3	Experiment	F	16	03Experiment	36.5	11.5	40.5	6	2
1030	1	3	Experiment	F	17	03Experiment	35	11.5	30.5	6	2
1046	1	3	Experiment	F	18	03Experiment	31.5	11.5	38	6	2
1062	1	3	Experiment	F	19	03Experiment	35	11.5	45	6	2
1078	1	3	Experiment	F	20	03Experiment	37	11.5	39.5	6	2
1094	1	3	Experiment	F	21	03Experiment	32.5	11.5	37.5	6	2
1110	1	3	Experiment	F	22	03Experiment	32.5	11.5	54	6	2
1126	1	3	Experiment	F	23	03Experiment	28.5	11.5	36	6	2
1142	1	3	Experiment	F	24	03Experiment	37	11.5	38.5	6	2
775	1	3	Experiment	G	1	03Experiment	25	13.5	33	7	2
791	1	3	Experiment	G	2	03Experiment	32	13.5	34.5	7	2
807	1	3	Experiment	G	3	03Experiment	29	13.5	32.5	7	2
823	1	3	Experiment	G	4	03Experiment	34.5	13.5	32.5	7	2
839	1	3	Experiment	G	5	03Experiment	32	13.5	33	7	2
855	1	3	Experiment	G	6	03Experiment	30	13.5	32	7	2
871	1	3	Experiment	G	7	03Experiment	34.5	13.5	32	7	2
887	1	3	Experiment	G	8	03Experiment	34	13.5	30	7	2
903	1	3	Experiment	G	9	03Experiment	34	13.5	24.5	7	2
919	1	3	Experiment	G	10	03Experiment	33.5	13.5	30.5	7	2
935	1	3	Experiment	G	11	03Experiment	16.5	13.5	14.5	7	2
951	1	3	Experiment	G	12	03Experiment	32.5	13.5	32	7	2
967	1	3	Experiment	G	13	03Experiment	38.5	13.5	28.5	7	2
983	1	3	Experiment	G	14	03Experiment	24	13.5	26	7	2
999	1	3	Experiment	G	15	03Experiment	32.5	13.5	37	7	2
1015	1	3	Experiment	G	16	03Experiment	34	13.5	34	7	2
1031	1	3	Experiment	G	17	03Experiment	31.5	13.5	32.5	7	2
1047	1	3	Experiment	G	18	03Experiment	32	13.5	42	7	2
1063	1	3	Experiment	G	19	03Experiment	34	13.5	40.5	7	2
1079	1	3	Experiment	G	20	03Experiment	32.5	13.5	39.5	7	2
1095	1	3	Experiment	G	21	03Experiment	0	13.5	0	7	2
1111	1	3	Experiment	G	22	03Experiment	25.5	13.5	35	7	2
1127	1	3	Experiment	G	23	03Experiment	34.5	13.5	50	7	2
1143	1	3	Experiment	G	24	03Experiment	33.5	13.5	38.5	7	2
776	1	3	Experiment	H	1	03Experiment	37.5	15.5	43.5	8	2
792	1	3	Experiment	H	2	03Experiment	33	15.5	36	8	2
808	1	3	Experiment	H	3	03Experiment	30.5	15.5	31.5	8	2
824	1	3	Experiment	H	4	03Experiment	30.5	15.5	32	8	2
840	1	3	Experiment	H	5	03Experiment	30	15.5	30	8	2
856	1	3	Experiment	H	6	03Experiment	32	15.5	28	8	2
872	1	3	Experiment	H	7	03Experiment	32	15.5	37	8	2
888	1	3	Experiment	H	8	03Experiment	32	15.5	32.5	8	2
904	1	3	Experiment	H	9	03Experiment	32	15.5	35	8	2
920	1	3	Experiment	H	10	03Experiment	32	15.5	30	8	2
936	1	3	Experiment	H	11	03Experiment	35.5	15.5	52.5	8	2
952	1	3	Experiment	H	12	03Experiment	29	15.5	26.5	8	2
968	1	3	Experiment	H	13	03Experiment	30	15.5	23	8	2
984	1	3	Experiment	H	14	03Experiment	33	15.5	27.5	8	2
1000	1	3	Experiment	H	15	03Experiment	25.5	15.5	26.5	8	2
1016	1	3	Experiment	H	16	03Experiment	32	15.5	29	8	2
1032	1	3	Experiment	H	17	03Experiment	29.5	15.5	31	8	2
1048	1	3	Experiment	H	18	03Experiment	29	15.5	27.5	8	2
1064	1	3	Experiment	H	19	03Experiment	30.5	15.5	37	8	2
1080	1	3	Experiment	H	20	03Experiment	30.5	15.5	37	8	2
1096	1	3	Experiment	H	21	03Experiment	36	15.5	54	8	2
1112	1	3	Experiment	H	22	03Experiment	25	15.5	33	8	2
1128	1	3	Experiment	H	23	03Experiment	27	15.5	34.5	8	2
1144	1	3	Experiment	H	24	03Experiment	32.5	15.5	33	8	2
777	1	3	Experiment	I	1	03Experiment	34	17.5	37	9	2
793	1	3	Experiment	I	2	03Experiment	30	17.5	28	9	2
809	1	3	Experiment	I	3	03Experiment	26	17.5	28	9	2
825	1	3	Experiment	I	4	03Experiment	33.5	17.5	34.5	9	2
841	1	3	Experiment	I	5	03Experiment	32	17.5	22.5	9	2
857	1	3	Experiment	I	6	03Experiment	32	17.5	26.5	9	2
873	1	3	Experiment	I	7	03Experiment	41.5	17.5	43.5	9	2
889	1	3	Experiment	I	8	03Experiment	29.5	17.5	32.5	9	2
905	1	3	Experiment	I	9	03Experiment	40	17.5	53	9	2
921	1	3	Experiment	I	10	03Experiment	32	17.5	50.5	9	2
937	1	3	Experiment	I	11	03Experiment	32.5	17.5	22	9	2
953	1	3	Experiment	I	12	03Experiment	27	17.5	27.5	9	2
969	1	3	Experiment	I	13	03Experiment	36	17.5	27	9	2
985	1	3	Experiment	I	14	03Experiment	28.5	17.5	21.5	9	2
1001	1	3	Experiment	I	15	03Experiment	22.5	17.5	21	9	2
1017	1	3	Experiment	I	16	03Experiment	27	17.5	30	9	2
1033	1	3	Experiment	I	17	03Experiment	30	17.5	28.5	9	2
1049	1	3	Experiment	I	18	03Experiment	27	17.5	33	9	2
1065	1	3	Experiment	I	19	03Experiment	36.5	17.5	53	9	2
1081	1	3	Experiment	I	20	03Experiment	28.5	17.5	24.5	9	2
1097	1	3	Experiment	I	21	03Experiment	22	17.5	31	9	2
1113	1	3	Experiment	I	22	03Experiment	29	17.5	29	9	2
1129	1	3	Experiment	I	23	03Experiment	28	17.5	27	9	2
1145	1	3	Experiment	I	24	03Experiment	32	17.5	46.5	9	2
778	1	3	Experiment	J	1	03Experiment	32.5	19.5	35	10	2
794	1	3	Experiment	J	2	03Experiment	30.5	19.5	29.5	10	2
810	1	3	Experiment	J	3	03Experiment	44	19.5	45	10	2
826	1	3	Experiment	J	4	03Experiment	28.5	19.5	30	10	2
842	1	3	Experiment	J	5	03Experiment	28.5	19.5	24	10	2
858	1	3	Experiment	J	6	03Experiment	29	19.5	26	10	2
874	1	3	Experiment	J	7	03Experiment	38.5	19.5	50	10	2
890	1	3	Experiment	J	8	03Experiment	30	19.5	26	10	2
906	1	3	Experiment	J	9	03Experiment	30.5	19.5	26	10	2
922	1	3	Experiment	J	10	03Experiment	26	19.5	21.5	10	2
938	1	3	Experiment	J	11	03Experiment	30	19.5	33.5	10	2
954	1	3	Experiment	J	12	03Experiment	28	19.5	21	10	2
970	1	3	Experiment	J	13	03Experiment	27	19.5	24.5	10	2
986	1	3	Experiment	J	14	03Experiment	28	19.5	25.5	10	2
1002	1	3	Experiment	J	15	03Experiment	26.5	19.5	45	10	2
1018	1	3	Experiment	J	16	03Experiment	30	19.5	25	10	2
1034	1	3	Experiment	J	17	03Experiment	25.5	19.5	27.5	10	2
1050	1	3	Experiment	J	18	03Experiment	28	19.5	30	10	2
1066	1	3	Experiment	J	19	03Experiment	40	19.5	51.5	10	2
1082	1	3	Experiment	J	20	03Experiment	2.5	19.5	6	10	2
1098	1	3	Experiment	J	21	03Experiment	2	19.5	7.5	10	2
1114	1	3	Experiment	J	22	03Experiment	22.5	19.5	20.5	10	2
1130	1	3	Experiment	J	23	03Experiment	21.5	19.5	23.5	10	2
1146	1	3	Experiment	J	24	03Experiment	28	19.5	30	10	2
779	1	3	Experiment	K	1	03Experiment	30.5	21.5	34	11	2
795	1	3	Experiment	K	2	03Experiment	34.5	21.5	30	11	2
811	1	3	Experiment	K	3	03Experiment	24	21.5	28	11	2
827	1	3	Experiment	K	4	03Experiment	31.5	21.5	25.5	11	2
843	1	3	Experiment	K	5	03Experiment	30.5	21.5	27.5	11	2
859	1	3	Experiment	K	6	03Experiment	28	21.5	33	11	2
875	1	3	Experiment	K	7	03Experiment	29.5	21.5	25.5	11	2
891	1	3	Experiment	K	8	03Experiment	33.5	21.5	27.5	11	2
907	1	3	Experiment	K	9	03Experiment	25	21.5	27.5	11	2
923	1	3	Experiment	K	10	03Experiment	29.5	21.5	23.5	11	2
939	1	3	Experiment	K	11	03Experiment	30.5	21.5	25	11	2
955	1	3	Experiment	K	12	03Experiment	28	21.5	19	11	2
971	1	3	Experiment	K	13	03Experiment	44.5	21.5	32	11	2
987	1	3	Experiment	K	14	03Experiment	30	21.5	20	11	2
1003	1	3	Experiment	K	15	03Experiment	9.5	21.5	5	11	2
1019	1	3	Experiment	K	16	03Experiment	28	21.5	29	11	2
1035	1	3	Experiment	K	17	03Experiment	18	21.5	13.5	11	2
1051	1	3	Experiment	K	18	03Experiment	26.5	21.5	23	11	2
1067	1	3	Experiment	K	19	03Experiment	34.5	21.5	34.5	11	2
1083	1	3	Experiment	K	20	03Experiment	28.5	21.5	29	11	2
1099	1	3	Experiment	K	21	03Experiment	24	21.5	14	11	2
1115	1	3	Experiment	K	22	03Experiment	24	21.5	26	11	2
1131	1	3	Experiment	K	23	03Experiment	23	21.5	23	11	2
1147	1	3	Experiment	K	24	03Experiment	25.5	21.5	32	11	2
780	1	3	Experiment	L	1	03Experiment	33.5	23.5	37.5	12	2
796	1	3	Experiment	L	2	03Experiment	25.5	23.5	26	12	2
812	1	3	Experiment	L	3	03Experiment	28	23.5	14.5	12	2
828	1	3	Experiment	L	4	03Experiment	29	23.5	28	12	2
844	1	3	Experiment	L	5	03Experiment	28.5	23.5	28	12	2
860	1	3	Experiment	L	6	03Experiment	26	23.5	28.5	12	2
876	1	3	Experiment	L	7	03Experiment	27.5	23.5	24	12	2
892	1	3	Experiment	L	8	03Experiment	27.5	23.5	23	12	2
908	1	3	Experiment	L	9	03Experiment	34	23.5	28.5	12	2
924	1	3	Experiment	L	10	03Experiment	30	23.5	35	12	2
940	1	3	Experiment	L	11	03Experiment	8	23.5	12.5	12	2
956	1	3	Experiment	L	12	03Experiment	31.5	23.5	27.5	12	2
972	1	3	Experiment	L	13	03Experiment	28	23.5	18	12	2
988	1	3	Experiment	L	14	03Experiment	21	23.5	26	12	2
1004	1	3	Experiment	L	15	03Experiment	30	23.5	29.5	12	2
1020	1	3	Experiment	L	16	03Experiment	0.5	23.5	0.5	12	2
1036	1	3	Experiment	L	17	03Experiment	25.5	23.5	29	12	2
1052	1	3	Experiment	L	18	03Experiment	23.5	23.5	23.5	12	2
1068	1	3	Experiment	L	19	03Experiment	35	23.5	42	12	2
1084	1	3	Experiment	L	20	03Experiment	0	23.5	0	12	2
1100	1	3	Experiment	L	21	03Experiment	29	23.5	29.5	12	2
1116	1	3	Experiment	L	22	03Experiment	0	23.5	1	12	2
1132	1	3	Experiment	L	23	03Experiment	27.5	23.5	31.5	12	2
1148	1	3	Experiment	L	24	03Experiment	32.5	23.5	35	12	2
781	1	3	Experiment	M	1	03Experiment	26	25.5	29.5	13	2
797	1	3	Experiment	M	2	03Experiment	23.5	25.5	31	13	2
813	1	3	Experiment	M	3	03Experiment	35.5	25.5	38	13	2
829	1	3	Experiment	M	4	03Experiment	23	25.5	24.5	13	2
845	1	3	Experiment	M	5	03Experiment	25.5	25.5	28	13	2
861	1	3	Experiment	M	6	03Experiment	26.5	25.5	23	13	2
877	1	3	Experiment	M	7	03Experiment	25	25.5	23.5	13	2
893	1	3	Experiment	M	8	03Experiment	33.5	25.5	38	13	2
909	1	3	Experiment	M	9	03Experiment	25	25.5	28.5	13	2
925	1	3	Experiment	M	10	03Experiment	26.5	25.5	24	13	2
941	1	3	Experiment	M	11	03Experiment	42	25.5	52.5	13	2
957	1	3	Experiment	M	12	03Experiment	33.5	25.5	41.5	13	2
973	1	3	Experiment	M	13	03Experiment	24.5	25.5	23	13	2
989	1	3	Experiment	M	14	03Experiment	24.5	25.5	24.5	13	2
1005	1	3	Experiment	M	15	03Experiment	22	25.5	24.5	13	2
1021	1	3	Experiment	M	16	03Experiment	26	25.5	25.5	13	2
1037	1	3	Experiment	M	17	03Experiment	23	25.5	26	13	2
1053	1	3	Experiment	M	18	03Experiment	24	25.5	21	13	2
1069	1	3	Experiment	M	19	03Experiment	26	25.5	20.5	13	2
1085	1	3	Experiment	M	20	03Experiment	23.5	25.5	26.5	13	2
1101	1	3	Experiment	M	21	03Experiment	23.5	25.5	23.5	13	2
1117	1	3	Experiment	M	22	03Experiment	0	25.5	0	13	2
1133	1	3	Experiment	M	23	03Experiment	24	25.5	25	13	2
1149	1	3	Experiment	M	24	03Experiment	33.5	25.5	54.5	13	2
782	1	3	Experiment	N	1	03Experiment	11	27.5	24	14	2
798	1	3	Experiment	N	2	03Experiment	17	27.5	22	14	2
814	1	3	Experiment	N	3	03Experiment	24.5	27.5	22	14	2
830	1	3	Experiment	N	4	03Experiment	25	27.5	25.5	14	2
846	1	3	Experiment	N	5	03Experiment	26.5	27.5	29.5	14	2
862	1	3	Experiment	N	6	03Experiment	23	27.5	25.5	14	2
878	1	3	Experiment	N	7	03Experiment	22.5	27.5	23.5	14	2
894	1	3	Experiment	N	8	03Experiment	22.5	27.5	22.5	14	2
910	1	3	Experiment	N	9	03Experiment	26	27.5	34	14	2
926	1	3	Experiment	N	10	03Experiment	24	27.5	24.5	14	2
942	1	3	Experiment	N	11	03Experiment	27	27.5	44.5	14	2
958	1	3	Experiment	N	12	03Experiment	26.5	27.5	26.5	14	2
974	1	3	Experiment	N	13	03Experiment	23	27.5	19.5	14	2
990	1	3	Experiment	N	14	03Experiment	17	27.5	26.5	14	2
1006	1	3	Experiment	N	15	03Experiment	23	27.5	22	14	2
1022	1	3	Experiment	N	16	03Experiment	26.5	27.5	37	14	2
1038	1	3	Experiment	N	17	03Experiment	22.5	27.5	25	14	2
1054	1	3	Experiment	N	18	03Experiment	21.5	27.5	21.5	14	2
1070	1	3	Experiment	N	19	03Experiment	19.5	27.5	23	14	2
1086	1	3	Experiment	N	20	03Experiment	19.5	27.5	20.5	14	2
1102	1	3	Experiment	N	21	03Experiment	21	27.5	23	14	2
1118	1	3	Experiment	N	22	03Experiment	18.5	27.5	19.5	14	2
1134	1	3	Experiment	N	23	03Experiment	21	27.5	22	14	2
1150	1	3	Experiment	N	24	03Experiment	24	27.5	29	14	2
783	1	3	Experiment	O	1	03Experiment	3	29.5	24.5	15	2
799	1	3	Experiment	O	2	03Experiment	13	29.5	26	15	2
815	1	3	Experiment	O	3	03Experiment	23	29.5	23.5	15	2
831	1	3	Experiment	O	4	03Experiment	15.5	29.5	18	15	2
847	1	3	Experiment	O	5	03Experiment	21.5	29.5	22.5	15	2
863	1	3	Experiment	O	6	03Experiment	25.5	29.5	31.5	15	2
879	1	3	Experiment	O	7	03Experiment	32.5	29.5	33.5	15	2
895	1	3	Experiment	O	8	03Experiment	42	29.5	43	15	2
911	1	3	Experiment	O	9	03Experiment	23	29.5	24.5	15	2
927	1	3	Experiment	O	10	03Experiment	24.5	29.5	21.5	15	2
943	1	3	Experiment	O	11	03Experiment	30	29.5	30.5	15	2
959	1	3	Experiment	O	12	03Experiment	28	29.5	36	15	2
975	1	3	Experiment	O	13	03Experiment	18.5	29.5	30	15	2
991	1	3	Experiment	O	14	03Experiment	23.5	29.5	14	15	2
1007	1	3	Experiment	O	15	03Experiment	17	29.5	19	15	2
1023	1	3	Experiment	O	16	03Experiment	23	29.5	25.5	15	2
1039	1	3	Experiment	O	17	03Experiment	30.5	29.5	39.5	15	2
1055	1	3	Experiment	O	18	03Experiment	24.5	29.5	32.5	15	2
1071	1	3	Experiment	O	19	03Experiment	22	29.5	27	15	2
1087	1	3	Experiment	O	20	03Experiment	6.5	29.5	17.5	15	2
1103	1	3	Experiment	O	21	03Experiment	12	29.5	19	15	2
1119	1	3	Experiment	O	22	03Experiment	18	29.5	23.5	15	2
1135	1	3	Experiment	O	23	03Experiment	8.5	29.5	14	15	2
1151	1	3	Experiment	O	24	03Experiment	20.5	29.5	27	15	2
784	1	3	Experiment	P	1	03Experiment	35	31.5	48	16	2
800	1	3	Experiment	P	2	03Experiment	34.5	31.5	38	16	2
816	1	3	Experiment	P	3	03Experiment	28.5	31.5	38	16	2
832	1	3	Experiment	P	4	03Experiment	31	31.5	41.5	16	2
848	1	3	Experiment	P	5	03Experiment	21.5	31.5	35.5	16	2
864	1	3	Experiment	P	6	03Experiment	34.5	31.5	31.5	16	2
880	1	3	Experiment	P	7	03Experiment	32	31.5	32.5	16	2
896	1	3	Experiment	P	8	03Experiment	29	31.5	32	16	2
912	1	3	Experiment	P	9	03Experiment	20	31.5	18.5	16	2
928	1	3	Experiment	P	10	03Experiment	43	31.5	38.5	16	2
944	1	3	Experiment	P	11	03Experiment	31	31.5	37.5	16	2
960	1	3	Experiment	P	12	03Experiment	0.5	31.5	6.5	16	2
976	1	3	Experiment	P	13	03Experiment	19.5	31.5	26	16	2
992	1	3	Experiment	P	14	03Experiment	31.5	31.5	35	16	2
1008	1	3	Experiment	P	15	03Experiment	37	31.5	45	16	2
1024	1	3	Experiment	P	16	03Experiment	36.5	31.5	30	16	2
1040	1	3	Experiment	P	17	03Experiment	30	31.5	36	16	2
1056	1	3	Experiment	P	18	03Experiment	32	31.5	33	16	2
1072	1	3	Experiment	P	19	03Experiment	15	31.5	33.5	16	2
1088	1	3	Experiment	P	20	03Experiment	30	31.5	39.5	16	2
1104	1	3	Experiment	P	21	03Experiment	37.5	31.5	52.5	16	2
1120	1	3	Experiment	P	22	03Experiment	21.5	31.5	39.5	16	2
1136	1	3	Experiment	P	23	03Experiment	16.5	31.5	19	16	2
1152	1	3	Experiment	P	24	03Experiment	33.5	31.5	36	16	2
1153	1	4	Experiment	A	1	04Experiment	47	1.5	49.5	1	3
1169	1	4	Experiment	A	2	04Experiment	35.5	1.5	39.5	1	3
1185	1	4	Experiment	A	3	04Experiment	43	1.5	44	1	3
1201	1	4	Experiment	A	4	04Experiment	26.5	1.5	39.5	1	3
1217	1	4	Experiment	A	5	04Experiment	89	1.5	73.5	1	3
1233	1	4	Experiment	A	6	04Experiment	47.5	1.5	47	1	3
1249	1	4	Experiment	A	7	04Experiment	74.5	1.5	68.5	1	3
1265	1	4	Experiment	A	8	04Experiment	46.5	1.5	28.5	1	3
1281	1	4	Experiment	A	9	04Experiment	44	1.5	34	1	3
1297	1	4	Experiment	A	10	04Experiment	50.5	1.5	42	1	3
1313	1	4	Experiment	A	11	04Experiment	49	1.5	44.5	1	3
1329	1	4	Experiment	A	12	04Experiment	87	1.5	65.5	1	3
1345	1	4	Experiment	A	13	04Experiment	48	1.5	42.5	1	3
1361	1	4	Experiment	A	14	04Experiment	48	1.5	42.5	1	3
1377	1	4	Experiment	A	15	04Experiment	51	1.5	42.5	1	3
1393	1	4	Experiment	A	16	04Experiment	69	1.5	52.5	1	3
1409	1	4	Experiment	A	17	04Experiment	56.5	1.5	49.5	1	3
1425	1	4	Experiment	A	18	04Experiment	68.5	1.5	58.5	1	3
1441	1	4	Experiment	A	19	04Experiment	52.5	1.5	47	1	3
1457	1	4	Experiment	A	20	04Experiment	40.5	1.5	33.5	1	3
1473	1	4	Experiment	A	21	04Experiment	40.5	1.5	44	1	3
1489	1	4	Experiment	A	22	04Experiment	41	1.5	44.5	1	3
1505	1	4	Experiment	A	23	04Experiment	35.5	1.5	39	1	3
1521	1	4	Experiment	A	24	04Experiment	58	1.5	64	1	3
1154	1	4	Experiment	B	1	04Experiment	43	3.5	0	2	3
1170	1	4	Experiment	B	2	04Experiment	28.5	3.5	29	2	3
1186	1	4	Experiment	B	3	04Experiment	38.5	3.5	40	2	3
1202	1	4	Experiment	B	4	04Experiment	47.5	3.5	53	2	3
1218	1	4	Experiment	B	5	04Experiment	41	3.5	35	2	3
1234	1	4	Experiment	B	6	04Experiment	42.5	3.5	38.5	2	3
1250	1	4	Experiment	B	7	04Experiment	45.5	3.5	41.5	2	3
1266	1	4	Experiment	B	8	04Experiment	46	3.5	45.5	2	3
1282	1	4	Experiment	B	9	04Experiment	32	3.5	24	2	3
1298	1	4	Experiment	B	10	04Experiment	39	3.5	23.5	2	3
1314	1	4	Experiment	B	11	04Experiment	52	3.5	41	2	3
1330	1	4	Experiment	B	12	04Experiment	41.5	3.5	37	2	3
1346	1	4	Experiment	B	13	04Experiment	59.5	3.5	53	2	3
1362	1	4	Experiment	B	14	04Experiment	45.5	3.5	42.5	2	3
1378	1	4	Experiment	B	15	04Experiment	47	3.5	42.5	2	3
1394	1	4	Experiment	B	16	04Experiment	43	3.5	39.5	2	3
1410	1	4	Experiment	B	17	04Experiment	35	3.5	31.5	2	3
1426	1	4	Experiment	B	18	04Experiment	44.5	3.5	32.5	2	3
1442	1	4	Experiment	B	19	04Experiment	47	3.5	43	2	3
1458	1	4	Experiment	B	20	04Experiment	36.5	3.5	28	2	3
1474	1	4	Experiment	B	21	04Experiment	45	3.5	38	2	3
1490	1	4	Experiment	B	22	04Experiment	32	3.5	28	2	3
1506	1	4	Experiment	B	23	04Experiment	41	3.5	35	2	3
1522	1	4	Experiment	B	24	04Experiment	46.5	3.5	40.5	2	3
1155	1	4	Experiment	C	1	04Experiment	37	5.5	0	3	3
1171	1	4	Experiment	C	2	04Experiment	31	5.5	0	3	3
1187	1	4	Experiment	C	3	04Experiment	36.5	5.5	23	3	3
1203	1	4	Experiment	C	4	04Experiment	36.5	5.5	35	3	3
1219	1	4	Experiment	C	5	04Experiment	85.5	5.5	88.5	3	3
1235	1	4	Experiment	C	6	04Experiment	41.5	5.5	46.5	3	3
1251	1	4	Experiment	C	7	04Experiment	34.5	5.5	31.5	3	3
1267	1	4	Experiment	C	8	04Experiment	37.5	5.5	28.5	3	3
1283	1	4	Experiment	C	9	04Experiment	62	5.5	59	3	3
1299	1	4	Experiment	C	10	04Experiment	42	5.5	35.5	3	3
1315	1	4	Experiment	C	11	04Experiment	48.5	5.5	40.5	3	3
1331	1	4	Experiment	C	12	04Experiment	85	5.5	80	3	3
1347	1	4	Experiment	C	13	04Experiment	39.5	5.5	32	3	3
1363	1	4	Experiment	C	14	04Experiment	36	5.5	25.5	3	3
1379	1	4	Experiment	C	15	04Experiment	47	5.5	44	3	3
1395	1	4	Experiment	C	16	04Experiment	38	5.5	35.5	3	3
1411	1	4	Experiment	C	17	04Experiment	39	5.5	35.5	3	3
1427	1	4	Experiment	C	18	04Experiment	42.5	5.5	35	3	3
1443	1	4	Experiment	C	19	04Experiment	34	5.5	26	3	3
1459	1	4	Experiment	C	20	04Experiment	46.5	5.5	46	3	3
1475	1	4	Experiment	C	21	04Experiment	29.5	5.5	34.5	3	3
1491	1	4	Experiment	C	22	04Experiment	38	5.5	33.5	3	3
1507	1	4	Experiment	C	23	04Experiment	19.5	5.5	19	3	3
1523	1	4	Experiment	C	24	04Experiment	53	5.5	47	3	3
1156	1	4	Experiment	D	1	04Experiment	49	7.5	0	4	3
1172	1	4	Experiment	D	2	04Experiment	36.5	7.5	0	4	3
1188	1	4	Experiment	D	3	04Experiment	47	7.5	41	4	3
1204	1	4	Experiment	D	4	04Experiment	38	7.5	37	4	3
1220	1	4	Experiment	D	5	04Experiment	26	7.5	30.5	4	3
1236	1	4	Experiment	D	6	04Experiment	39	7.5	37.5	4	3
1252	1	4	Experiment	D	7	04Experiment	48.5	7.5	40.5	4	3
1268	1	4	Experiment	D	8	04Experiment	37.5	7.5	34.5	4	3
1284	1	4	Experiment	D	9	04Experiment	30.5	7.5	35.5	4	3
1300	1	4	Experiment	D	10	04Experiment	51	7.5	43.5	4	3
1316	1	4	Experiment	D	11	04Experiment	42.5	7.5	35.5	4	3
1332	1	4	Experiment	D	12	04Experiment	48	7.5	41.5	4	3
1348	1	4	Experiment	D	13	04Experiment	44	7.5	42	4	3
1364	1	4	Experiment	D	14	04Experiment	41.5	7.5	32.5	4	3
1380	1	4	Experiment	D	15	04Experiment	38.5	7.5	34	4	3
1396	1	4	Experiment	D	16	04Experiment	37.5	7.5	33	4	3
1412	1	4	Experiment	D	17	04Experiment	41	7.5	38.5	4	3
1428	1	4	Experiment	D	18	04Experiment	46.5	7.5	41.5	4	3
1444	1	4	Experiment	D	19	04Experiment	48	7.5	48.5	4	3
1460	1	4	Experiment	D	20	04Experiment	38.5	7.5	37.5	4	3
1476	1	4	Experiment	D	21	04Experiment	7	7.5	35.5	4	3
1492	1	4	Experiment	D	22	04Experiment	45.5	7.5	57.5	4	3
1508	1	4	Experiment	D	23	04Experiment	40.5	7.5	42.5	4	3
1524	1	4	Experiment	D	24	04Experiment	42.5	7.5	39	4	3
1157	1	4	Experiment	E	1	04Experiment	50.5	9.5	0	5	3
1173	1	4	Experiment	E	2	04Experiment	39	9.5	0	5	3
1189	1	4	Experiment	E	3	04Experiment	40	9.5	29.5	5	3
1205	1	4	Experiment	E	4	04Experiment	13	9.5	20.5	5	3
1221	1	4	Experiment	E	5	04Experiment	40	9.5	47	5	3
1237	1	4	Experiment	E	6	04Experiment	67	9.5	58.5	5	3
1253	1	4	Experiment	E	7	04Experiment	33.5	9.5	32	5	3
1269	1	4	Experiment	E	8	04Experiment	37	9.5	25	5	3
1285	1	4	Experiment	E	9	04Experiment	35.5	9.5	26.5	5	3
1301	1	4	Experiment	E	10	04Experiment	42	9.5	31	5	3
1317	1	4	Experiment	E	11	04Experiment	64.5	9.5	62.5	5	3
1333	1	4	Experiment	E	12	04Experiment	49.5	9.5	41.5	5	3
1349	1	4	Experiment	E	13	04Experiment	39	9.5	34.5	5	3
1365	1	4	Experiment	E	14	04Experiment	37	9.5	31.5	5	3
1381	1	4	Experiment	E	15	04Experiment	32	9.5	22	5	3
1397	1	4	Experiment	E	16	04Experiment	49.5	9.5	42	5	3
1413	1	4	Experiment	E	17	04Experiment	45.5	9.5	41.5	5	3
1429	1	4	Experiment	E	18	04Experiment	36	9.5	37	5	3
1445	1	4	Experiment	E	19	04Experiment	37	9.5	37	5	3
1461	1	4	Experiment	E	20	04Experiment	35	9.5	32	5	3
1477	1	4	Experiment	E	21	04Experiment	28.5	9.5	21.5	5	3
1493	1	4	Experiment	E	22	04Experiment	33.5	9.5	39	5	3
1509	1	4	Experiment	E	23	04Experiment	70.5	9.5	62	5	3
1525	1	4	Experiment	E	24	04Experiment	52	9.5	48.5	5	3
1158	1	4	Experiment	F	1	04Experiment	37.5	11.5	26	6	3
1174	1	4	Experiment	F	2	04Experiment	36	11.5	34	6	3
1190	1	4	Experiment	F	3	04Experiment	34	11.5	32.5	6	3
1206	1	4	Experiment	F	4	04Experiment	32.5	11.5	35.5	6	3
1222	1	4	Experiment	F	5	04Experiment	36.5	11.5	36	6	3
1238	1	4	Experiment	F	6	04Experiment	34.5	11.5	33	6	3
1254	1	4	Experiment	F	7	04Experiment	43	11.5	35.5	6	3
1270	1	4	Experiment	F	8	04Experiment	25	11.5	27.5	6	3
1286	1	4	Experiment	F	9	04Experiment	6	11.5	8	6	3
1302	1	4	Experiment	F	10	04Experiment	13	11.5	11.5	6	3
1318	1	4	Experiment	F	11	04Experiment	40	11.5	38	6	3
1334	1	4	Experiment	F	12	04Experiment	32.5	11.5	29.5	6	3
1350	1	4	Experiment	F	13	04Experiment	76.5	11.5	78	6	3
1366	1	4	Experiment	F	14	04Experiment	45	11.5	35.5	6	3
1382	1	4	Experiment	F	15	04Experiment	38.5	11.5	34	6	3
1398	1	4	Experiment	F	16	04Experiment	40	11.5	40.5	6	3
1414	1	4	Experiment	F	17	04Experiment	30	11.5	30.5	6	3
1430	1	4	Experiment	F	18	04Experiment	37	11.5	38	6	3
1446	1	4	Experiment	F	19	04Experiment	38.5	11.5	45	6	3
1462	1	4	Experiment	F	20	04Experiment	47	11.5	39.5	6	3
1478	1	4	Experiment	F	21	04Experiment	35	11.5	37.5	6	3
1494	1	4	Experiment	F	22	04Experiment	52.5	11.5	54	6	3
1510	1	4	Experiment	F	23	04Experiment	47.5	11.5	36	6	3
1526	1	4	Experiment	F	24	04Experiment	41	11.5	38.5	6	3
1159	1	4	Experiment	G	1	04Experiment	37	13.5	33	7	3
1175	1	4	Experiment	G	2	04Experiment	34.5	13.5	34.5	7	3
1191	1	4	Experiment	G	3	04Experiment	28	13.5	32.5	7	3
1207	1	4	Experiment	G	4	04Experiment	35	13.5	32.5	7	3
1223	1	4	Experiment	G	5	04Experiment	34.5	13.5	33	7	3
1239	1	4	Experiment	G	6	04Experiment	32.5	13.5	32	7	3
1255	1	4	Experiment	G	7	04Experiment	39	13.5	32	7	3
1271	1	4	Experiment	G	8	04Experiment	37.5	13.5	30	7	3
1287	1	4	Experiment	G	9	04Experiment	33	13.5	24.5	7	3
1303	1	4	Experiment	G	10	04Experiment	38.5	13.5	30.5	7	3
1319	1	4	Experiment	G	11	04Experiment	17.5	13.5	14.5	7	3
1335	1	4	Experiment	G	12	04Experiment	37	13.5	32	7	3
1351	1	4	Experiment	G	13	04Experiment	34	13.5	28.5	7	3
1367	1	4	Experiment	G	14	04Experiment	29	13.5	26	7	3
1383	1	4	Experiment	G	15	04Experiment	36	13.5	37	7	3
1399	1	4	Experiment	G	16	04Experiment	35.5	13.5	34	7	3
1415	1	4	Experiment	G	17	04Experiment	35	13.5	32.5	7	3
1431	1	4	Experiment	G	18	04Experiment	41	13.5	42	7	3
1447	1	4	Experiment	G	19	04Experiment	39	13.5	40.5	7	3
1463	1	4	Experiment	G	20	04Experiment	40.5	13.5	39.5	7	3
1479	1	4	Experiment	G	21	04Experiment	0	13.5	0	7	3
1495	1	4	Experiment	G	22	04Experiment	26.5	13.5	35	7	3
1511	1	4	Experiment	G	23	04Experiment	48.5	13.5	50	7	3
1527	1	4	Experiment	G	24	04Experiment	36.5	13.5	38.5	7	3
1160	1	4	Experiment	H	1	04Experiment	50.5	15.5	43.5	8	3
1176	1	4	Experiment	H	2	04Experiment	32.5	15.5	36	8	3
1192	1	4	Experiment	H	3	04Experiment	33	15.5	31.5	8	3
1208	1	4	Experiment	H	4	04Experiment	30	15.5	32	8	3
1224	1	4	Experiment	H	5	04Experiment	31	15.5	30	8	3
1240	1	4	Experiment	H	6	04Experiment	35	15.5	28	8	3
1256	1	4	Experiment	H	7	04Experiment	41	15.5	37	8	3
1272	1	4	Experiment	H	8	04Experiment	37	15.5	32.5	8	3
1288	1	4	Experiment	H	9	04Experiment	45	15.5	35	8	3
1304	1	4	Experiment	H	10	04Experiment	34	15.5	30	8	3
1320	1	4	Experiment	H	11	04Experiment	53	15.5	52.5	8	3
1336	1	4	Experiment	H	12	04Experiment	32.5	15.5	26.5	8	3
1352	1	4	Experiment	H	13	04Experiment	38	15.5	23	8	3
1368	1	4	Experiment	H	14	04Experiment	36	15.5	27.5	8	3
1384	1	4	Experiment	H	15	04Experiment	35.5	15.5	26.5	8	3
1400	1	4	Experiment	H	16	04Experiment	34.5	15.5	29	8	3
1416	1	4	Experiment	H	17	04Experiment	34	15.5	31	8	3
1432	1	4	Experiment	H	18	04Experiment	27	15.5	27.5	8	3
1448	1	4	Experiment	H	19	04Experiment	37	15.5	37	8	3
1464	1	4	Experiment	H	20	04Experiment	33	15.5	37	8	3
1480	1	4	Experiment	H	21	04Experiment	58.5	15.5	54	8	3
1496	1	4	Experiment	H	22	04Experiment	26	15.5	33	8	3
1512	1	4	Experiment	H	23	04Experiment	37.5	15.5	34.5	8	3
1528	1	4	Experiment	H	24	04Experiment	33	15.5	33	8	3
1161	1	4	Experiment	I	1	04Experiment	40	17.5	37	9	3
1177	1	4	Experiment	I	2	04Experiment	33	17.5	28	9	3
1193	1	4	Experiment	I	3	04Experiment	29	17.5	28	9	3
1209	1	4	Experiment	I	4	04Experiment	38.5	17.5	34.5	9	3
1225	1	4	Experiment	I	5	04Experiment	33	17.5	22.5	9	3
1241	1	4	Experiment	I	6	04Experiment	29	17.5	26.5	9	3
1257	1	4	Experiment	I	7	04Experiment	45	17.5	43.5	9	3
1273	1	4	Experiment	I	8	04Experiment	37	17.5	32.5	9	3
1289	1	4	Experiment	I	9	04Experiment	56.5	17.5	53	9	3
1305	1	4	Experiment	I	10	04Experiment	17	17.5	50.5	9	3
1321	1	4	Experiment	I	11	04Experiment	28	17.5	22	9	3
1337	1	4	Experiment	I	12	04Experiment	29.5	17.5	27.5	9	3
1353	1	4	Experiment	I	13	04Experiment	46.5	17.5	27	9	3
1369	1	4	Experiment	I	14	04Experiment	30	17.5	21.5	9	3
1385	1	4	Experiment	I	15	04Experiment	22.5	17.5	21	9	3
1401	1	4	Experiment	I	16	04Experiment	26.5	17.5	30	9	3
1417	1	4	Experiment	I	17	04Experiment	31	17.5	28.5	9	3
1433	1	4	Experiment	I	18	04Experiment	39.5	17.5	33	9	3
1449	1	4	Experiment	I	19	04Experiment	57	17.5	53	9	3
1465	1	4	Experiment	I	20	04Experiment	34.5	17.5	24.5	9	3
1481	1	4	Experiment	I	21	04Experiment	37	17.5	31	9	3
1497	1	4	Experiment	I	22	04Experiment	30.5	17.5	29	9	3
1513	1	4	Experiment	I	23	04Experiment	33	17.5	27	9	3
1529	1	4	Experiment	I	24	04Experiment	46.5	17.5	46.5	9	3
1162	1	4	Experiment	J	1	04Experiment	40	19.5	35	10	3
1178	1	4	Experiment	J	2	04Experiment	34	19.5	29.5	10	3
1194	1	4	Experiment	J	3	04Experiment	46.5	19.5	45	10	3
1210	1	4	Experiment	J	4	04Experiment	31	19.5	30	10	3
1226	1	4	Experiment	J	5	04Experiment	29	19.5	24	10	3
1242	1	4	Experiment	J	6	04Experiment	30.5	19.5	26	10	3
1258	1	4	Experiment	J	7	04Experiment	59.5	19.5	50	10	3
1274	1	4	Experiment	J	8	04Experiment	34	19.5	26	10	3
1290	1	4	Experiment	J	9	04Experiment	32	19.5	26	10	3
1306	1	4	Experiment	J	10	04Experiment	28.5	19.5	21.5	10	3
1322	1	4	Experiment	J	11	04Experiment	36	19.5	33.5	10	3
1338	1	4	Experiment	J	12	04Experiment	27	19.5	21	10	3
1354	1	4	Experiment	J	13	04Experiment	31.5	19.5	24.5	10	3
1370	1	4	Experiment	J	14	04Experiment	32.5	19.5	25.5	10	3
1386	1	4	Experiment	J	15	04Experiment	43.5	19.5	45	10	3
1402	1	4	Experiment	J	16	04Experiment	29	19.5	25	10	3
1418	1	4	Experiment	J	17	04Experiment	29.5	19.5	27.5	10	3
1434	1	4	Experiment	J	18	04Experiment	39	19.5	30	10	3
1450	1	4	Experiment	J	19	04Experiment	60	19.5	51.5	10	3
1466	1	4	Experiment	J	20	04Experiment	3	19.5	6	10	3
1482	1	4	Experiment	J	21	04Experiment	6.5	19.5	7.5	10	3
1498	1	4	Experiment	J	22	04Experiment	24.5	19.5	20.5	10	3
1514	1	4	Experiment	J	23	04Experiment	33	19.5	23.5	10	3
1530	1	4	Experiment	J	24	04Experiment	31.5	19.5	30	10	3
1163	1	4	Experiment	K	1	04Experiment	34	21.5	34	11	3
1179	1	4	Experiment	K	2	04Experiment	28.5	21.5	30	11	3
1195	1	4	Experiment	K	3	04Experiment	29.5	21.5	28	11	3
1211	1	4	Experiment	K	4	04Experiment	27.5	21.5	25.5	11	3
1227	1	4	Experiment	K	5	04Experiment	34	21.5	27.5	11	3
1243	1	4	Experiment	K	6	04Experiment	36.5	21.5	33	11	3
1259	1	4	Experiment	K	7	04Experiment	29.5	21.5	25.5	11	3
1275	1	4	Experiment	K	8	04Experiment	36.5	21.5	27.5	11	3
1291	1	4	Experiment	K	9	04Experiment	31	21.5	27.5	11	3
1307	1	4	Experiment	K	10	04Experiment	29.5	21.5	23.5	11	3
1323	1	4	Experiment	K	11	04Experiment	33	21.5	25	11	3
1339	1	4	Experiment	K	12	04Experiment	24	21.5	19	11	3
1355	1	4	Experiment	K	13	04Experiment	38.5	21.5	32	11	3
1371	1	4	Experiment	K	14	04Experiment	26.5	21.5	20	11	3
1387	1	4	Experiment	K	15	04Experiment	9.5	21.5	5	11	3
1403	1	4	Experiment	K	16	04Experiment	36	21.5	29	11	3
1419	1	4	Experiment	K	17	04Experiment	19.5	21.5	13.5	11	3
1435	1	4	Experiment	K	18	04Experiment	32	21.5	23	11	3
1451	1	4	Experiment	K	19	04Experiment	38	21.5	34.5	11	3
1467	1	4	Experiment	K	20	04Experiment	42.5	21.5	29	11	3
1483	1	4	Experiment	K	21	04Experiment	22.5	21.5	14	11	3
1499	1	4	Experiment	K	22	04Experiment	37.5	21.5	26	11	3
1515	1	4	Experiment	K	23	04Experiment	31	21.5	23	11	3
1531	1	4	Experiment	K	24	04Experiment	37.5	21.5	32	11	3
1164	1	4	Experiment	L	1	04Experiment	29.5	23.5	37.5	12	3
1180	1	4	Experiment	L	2	04Experiment	22.5	23.5	26	12	3
1196	1	4	Experiment	L	3	04Experiment	21	23.5	14.5	12	3
1212	1	4	Experiment	L	4	04Experiment	27	23.5	28	12	3
1228	1	4	Experiment	L	5	04Experiment	27.5	23.5	28	12	3
1244	1	4	Experiment	L	6	04Experiment	27.5	23.5	28.5	12	3
1260	1	4	Experiment	L	7	04Experiment	28.5	23.5	24	12	3
1276	1	4	Experiment	L	8	04Experiment	28	23.5	23	12	3
1292	1	4	Experiment	L	9	04Experiment	40.5	23.5	28.5	12	3
1308	1	4	Experiment	L	10	04Experiment	40	23.5	35	12	3
1324	1	4	Experiment	L	11	04Experiment	11.5	23.5	12.5	12	3
1340	1	4	Experiment	L	12	04Experiment	35	23.5	27.5	12	3
1356	1	4	Experiment	L	13	04Experiment	26	23.5	18	12	3
1372	1	4	Experiment	L	14	04Experiment	23	23.5	26	12	3
1388	1	4	Experiment	L	15	04Experiment	38.5	23.5	29.5	12	3
1404	1	4	Experiment	L	16	04Experiment	0	23.5	0.5	12	3
1420	1	4	Experiment	L	17	04Experiment	32.5	23.5	29	12	3
1436	1	4	Experiment	L	18	04Experiment	24.5	23.5	23.5	12	3
1452	1	4	Experiment	L	19	04Experiment	49.5	23.5	42	12	3
1468	1	4	Experiment	L	20	04Experiment	0	23.5	0	12	3
1484	1	4	Experiment	L	21	04Experiment	38	23.5	29.5	12	3
1500	1	4	Experiment	L	22	04Experiment	0	23.5	1	12	3
1516	1	4	Experiment	L	23	04Experiment	40.5	23.5	31.5	12	3
1532	1	4	Experiment	L	24	04Experiment	45.5	23.5	35	12	3
1165	1	4	Experiment	M	1	04Experiment	21.5	25.5	29.5	13	3
1181	1	4	Experiment	M	2	04Experiment	21	25.5	31	13	3
1197	1	4	Experiment	M	3	04Experiment	42.5	25.5	38	13	3
1213	1	4	Experiment	M	4	04Experiment	27.5	25.5	24.5	13	3
1229	1	4	Experiment	M	5	04Experiment	32	25.5	28	13	3
1245	1	4	Experiment	M	6	04Experiment	24	25.5	23	13	3
1261	1	4	Experiment	M	7	04Experiment	27.5	25.5	23.5	13	3
1277	1	4	Experiment	M	8	04Experiment	50	25.5	38	13	3
1293	1	4	Experiment	M	9	04Experiment	36	25.5	28.5	13	3
1309	1	4	Experiment	M	10	04Experiment	27	25.5	24	13	3
1325	1	4	Experiment	M	11	04Experiment	58	25.5	52.5	13	3
1341	1	4	Experiment	M	12	04Experiment	33	25.5	41.5	13	3
1357	1	4	Experiment	M	13	04Experiment	29	25.5	23	13	3
1373	1	4	Experiment	M	14	04Experiment	34.5	25.5	24.5	13	3
1389	1	4	Experiment	M	15	04Experiment	25	25.5	24.5	13	3
1405	1	4	Experiment	M	16	04Experiment	24	25.5	25.5	13	3
1421	1	4	Experiment	M	17	04Experiment	27	25.5	26	13	3
1437	1	4	Experiment	M	18	04Experiment	30.5	25.5	21	13	3
1453	1	4	Experiment	M	19	04Experiment	25.5	25.5	20.5	13	3
1469	1	4	Experiment	M	20	04Experiment	34	25.5	26.5	13	3
1485	1	4	Experiment	M	21	04Experiment	31.5	25.5	23.5	13	3
1501	1	4	Experiment	M	22	04Experiment	0	25.5	0	13	3
1517	1	4	Experiment	M	23	04Experiment	33	25.5	25	13	3
1533	1	4	Experiment	M	24	04Experiment	59.5	25.5	54.5	13	3
1166	1	4	Experiment	N	1	04Experiment	17	27.5	24	14	3
1182	1	4	Experiment	N	2	04Experiment	16.5	27.5	22	14	3
1198	1	4	Experiment	N	3	04Experiment	22.5	27.5	22	14	3
1214	1	4	Experiment	N	4	04Experiment	22	27.5	25.5	14	3
1230	1	4	Experiment	N	5	04Experiment	36	27.5	29.5	14	3
1246	1	4	Experiment	N	6	04Experiment	23.5	27.5	25.5	14	3
1262	1	4	Experiment	N	7	04Experiment	24.5	27.5	23.5	14	3
1278	1	4	Experiment	N	8	04Experiment	27	27.5	22.5	14	3
1294	1	4	Experiment	N	9	04Experiment	39	27.5	34	14	3
1310	1	4	Experiment	N	10	04Experiment	25.5	27.5	24.5	14	3
1326	1	4	Experiment	N	11	04Experiment	47	27.5	44.5	14	3
1342	1	4	Experiment	N	12	04Experiment	26	27.5	26.5	14	3
1358	1	4	Experiment	N	13	04Experiment	24.5	27.5	19.5	14	3
1374	1	4	Experiment	N	14	04Experiment	17.5	27.5	26.5	14	3
1390	1	4	Experiment	N	15	04Experiment	29.5	27.5	22	14	3
1406	1	4	Experiment	N	16	04Experiment	38.5	27.5	37	14	3
1422	1	4	Experiment	N	17	04Experiment	27.5	27.5	25	14	3
1438	1	4	Experiment	N	18	04Experiment	27.5	27.5	21.5	14	3
1454	1	4	Experiment	N	19	04Experiment	30.5	27.5	23	14	3
1470	1	4	Experiment	N	20	04Experiment	20	27.5	20.5	14	3
1486	1	4	Experiment	N	21	04Experiment	26	27.5	23	14	3
1502	1	4	Experiment	N	22	04Experiment	23	27.5	19.5	14	3
1518	1	4	Experiment	N	23	04Experiment	24.5	27.5	22	14	3
1534	1	4	Experiment	N	24	04Experiment	36	27.5	29	14	3
1167	1	4	Experiment	O	1	04Experiment	10.5	29.5	24.5	15	3
1183	1	4	Experiment	O	2	04Experiment	24.5	29.5	26	15	3
1199	1	4	Experiment	O	3	04Experiment	23	29.5	23.5	15	3
1215	1	4	Experiment	O	4	04Experiment	17	29.5	18	15	3
1231	1	4	Experiment	O	5	04Experiment	20	29.5	22.5	15	3
1247	1	4	Experiment	O	6	04Experiment	39	29.5	31.5	15	3
1263	1	4	Experiment	O	7	04Experiment	28.5	29.5	33.5	15	3
1279	1	4	Experiment	O	8	04Experiment	48	29.5	43	15	3
1295	1	4	Experiment	O	9	04Experiment	30	29.5	24.5	15	3
1311	1	4	Experiment	O	10	04Experiment	24.5	29.5	21.5	15	3
1327	1	4	Experiment	O	11	04Experiment	39.5	29.5	30.5	15	3
1343	1	4	Experiment	O	12	04Experiment	41	29.5	36	15	3
1359	1	4	Experiment	O	13	04Experiment	23	29.5	30	15	3
1375	1	4	Experiment	O	14	04Experiment	17	29.5	14	15	3
1391	1	4	Experiment	O	15	04Experiment	23	29.5	19	15	3
1407	1	4	Experiment	O	16	04Experiment	31.5	29.5	25.5	15	3
1423	1	4	Experiment	O	17	04Experiment	46	29.5	39.5	15	3
1439	1	4	Experiment	O	18	04Experiment	37	29.5	32.5	15	3
1455	1	4	Experiment	O	19	04Experiment	34	29.5	27	15	3
1471	1	4	Experiment	O	20	04Experiment	11.5	29.5	17.5	15	3
1487	1	4	Experiment	O	21	04Experiment	14	29.5	19	15	3
1503	1	4	Experiment	O	22	04Experiment	20	29.5	23.5	15	3
1519	1	4	Experiment	O	23	04Experiment	12	29.5	14	15	3
1535	1	4	Experiment	O	24	04Experiment	30	29.5	27	15	3
1168	1	4	Experiment	P	1	04Experiment	41	31.5	48	16	3
1184	1	4	Experiment	P	2	04Experiment	34.5	31.5	38	16	3
1200	1	4	Experiment	P	3	04Experiment	38.5	31.5	38	16	3
1216	1	4	Experiment	P	4	04Experiment	35.5	31.5	41.5	16	3
1232	1	4	Experiment	P	5	04Experiment	33	31.5	35.5	16	3
1248	1	4	Experiment	P	6	04Experiment	42	31.5	31.5	16	3
1264	1	4	Experiment	P	7	04Experiment	38.5	31.5	32.5	16	3
1280	1	4	Experiment	P	8	04Experiment	32.5	31.5	32	16	3
1296	1	4	Experiment	P	9	04Experiment	16	31.5	18.5	16	3
1312	1	4	Experiment	P	10	04Experiment	48.5	31.5	38.5	16	3
1328	1	4	Experiment	P	11	04Experiment	40	31.5	37.5	16	3
1344	1	4	Experiment	P	12	04Experiment	0.5	31.5	6.5	16	3
1360	1	4	Experiment	P	13	04Experiment	30	31.5	26	16	3
1376	1	4	Experiment	P	14	04Experiment	42.5	31.5	35	16	3
1392	1	4	Experiment	P	15	04Experiment	49.5	31.5	45	16	3
1408	1	4	Experiment	P	16	04Experiment	40.5	31.5	30	16	3
1424	1	4	Experiment	P	17	04Experiment	42	31.5	36	16	3
1440	1	4	Experiment	P	18	04Experiment	40	31.5	33	16	3
1456	1	4	Experiment	P	19	04Experiment	29.5	31.5	33.5	16	3
1472	1	4	Experiment	P	20	04Experiment	52	31.5	39.5	16	3
1488	1	4	Experiment	P	21	04Experiment	64	31.5	52.5	16	3
1504	1	4	Experiment	P	22	04Experiment	30	31.5	39.5	16	3
1520	1	4	Experiment	P	23	04Experiment	21	31.5	19	16	3
1536	1	4	Experiment	P	24	04Experiment	43	31.5	36	16	3
1537	1	5	Experiment	A	1	05Experiment	36	1.5	49.5	1	4
1553	1	5	Experiment	A	2	05Experiment	30.5	1.5	39.5	1	4
1569	1	5	Experiment	A	3	05Experiment	35	1.5	44	1	4
1585	1	5	Experiment	A	4	05Experiment	32	1.5	39.5	1	4
1601	1	5	Experiment	A	5	05Experiment	55.5	1.5	73.5	1	4
1617	1	5	Experiment	A	6	05Experiment	40	1.5	47	1	4
1633	1	5	Experiment	A	7	05Experiment	46	1.5	68.5	1	4
1649	1	5	Experiment	A	8	05Experiment	33	1.5	28.5	1	4
1665	1	5	Experiment	A	9	05Experiment	35	1.5	34	1	4
1681	1	5	Experiment	A	10	05Experiment	43.5	1.5	42	1	4
1697	1	5	Experiment	A	11	05Experiment	40	1.5	44.5	1	4
1713	1	5	Experiment	A	12	05Experiment	64.5	1.5	65.5	1	4
1729	1	5	Experiment	A	13	05Experiment	36.5	1.5	42.5	1	4
1745	1	5	Experiment	A	14	05Experiment	37.5	1.5	42.5	1	4
1761	1	5	Experiment	A	15	05Experiment	39.5	1.5	42.5	1	4
1777	1	5	Experiment	A	16	05Experiment	52.5	1.5	52.5	1	4
1793	1	5	Experiment	A	17	05Experiment	43.5	1.5	49.5	1	4
1809	1	5	Experiment	A	18	05Experiment	51	1.5	58.5	1	4
1825	1	5	Experiment	A	19	05Experiment	40	1.5	47	1	4
1841	1	5	Experiment	A	20	05Experiment	29	1.5	33.5	1	4
1857	1	5	Experiment	A	21	05Experiment	5.5	1.5	44	1	4
1873	1	5	Experiment	A	22	05Experiment	28.5	1.5	44.5	1	4
1889	1	5	Experiment	A	23	05Experiment	26.5	1.5	39	1	4
1905	1	5	Experiment	A	24	05Experiment	35.5	1.5	64	1	4
1538	1	5	Experiment	B	1	05Experiment	34	3.5	0	2	4
1554	1	5	Experiment	B	2	05Experiment	29	3.5	29	2	4
1570	1	5	Experiment	B	3	05Experiment	33	3.5	40	2	4
1586	1	5	Experiment	B	4	05Experiment	41.5	3.5	53	2	4
1602	1	5	Experiment	B	5	05Experiment	35	3.5	35	2	4
1618	1	5	Experiment	B	6	05Experiment	35.5	3.5	38.5	2	4
1634	1	5	Experiment	B	7	05Experiment	37	3.5	41.5	2	4
1650	1	5	Experiment	B	8	05Experiment	39	3.5	45.5	2	4
1666	1	5	Experiment	B	9	05Experiment	30	3.5	24	2	4
1682	1	5	Experiment	B	10	05Experiment	40.5	3.5	23.5	2	4
1698	1	5	Experiment	B	11	05Experiment	41.5	3.5	41	2	4
1714	1	5	Experiment	B	12	05Experiment	40	3.5	37	2	4
1730	1	5	Experiment	B	13	05Experiment	47	3.5	53	2	4
1746	1	5	Experiment	B	14	05Experiment	40	3.5	42.5	2	4
1762	1	5	Experiment	B	15	05Experiment	40.5	3.5	42.5	2	4
1778	1	5	Experiment	B	16	05Experiment	39.5	3.5	39.5	2	4
1794	1	5	Experiment	B	17	05Experiment	32	3.5	31.5	2	4
1810	1	5	Experiment	B	18	05Experiment	37.5	3.5	32.5	2	4
1826	1	5	Experiment	B	19	05Experiment	36.5	3.5	43	2	4
1842	1	5	Experiment	B	20	05Experiment	29.5	3.5	28	2	4
1858	1	5	Experiment	B	21	05Experiment	33.5	3.5	38	2	4
1874	1	5	Experiment	B	22	05Experiment	27.5	3.5	28	2	4
1890	1	5	Experiment	B	23	05Experiment	27.5	3.5	35	2	4
1906	1	5	Experiment	B	24	05Experiment	26.5	3.5	40.5	2	4
1539	1	5	Experiment	C	1	05Experiment	35	5.5	0	3	4
1555	1	5	Experiment	C	2	05Experiment	29.5	5.5	0	3	4
1571	1	5	Experiment	C	3	05Experiment	32	5.5	23	3	4
1587	1	5	Experiment	C	4	05Experiment	29.5	5.5	35	3	4
1603	1	5	Experiment	C	5	05Experiment	68	5.5	88.5	3	4
1619	1	5	Experiment	C	6	05Experiment	37	5.5	46.5	3	4
1635	1	5	Experiment	C	7	05Experiment	32	5.5	31.5	3	4
1651	1	5	Experiment	C	8	05Experiment	28.5	5.5	28.5	3	4
1667	1	5	Experiment	C	9	05Experiment	65	5.5	59	3	4
1683	1	5	Experiment	C	10	05Experiment	36	5.5	35.5	3	4
1699	1	5	Experiment	C	11	05Experiment	41	5.5	40.5	3	4
1715	1	5	Experiment	C	12	05Experiment	68	5.5	80	3	4
1731	1	5	Experiment	C	13	05Experiment	38	5.5	32	3	4
1747	1	5	Experiment	C	14	05Experiment	27	5.5	25.5	3	4
1763	1	5	Experiment	C	15	05Experiment	43	5.5	44	3	4
1779	1	5	Experiment	C	16	05Experiment	35.5	5.5	35.5	3	4
1795	1	5	Experiment	C	17	05Experiment	39	5.5	35.5	3	4
1811	1	5	Experiment	C	18	05Experiment	38	5.5	35	3	4
1827	1	5	Experiment	C	19	05Experiment	29	5.5	26	3	4
1843	1	5	Experiment	C	20	05Experiment	39.5	5.5	46	3	4
1859	1	5	Experiment	C	21	05Experiment	28	5.5	34.5	3	4
1875	1	5	Experiment	C	22	05Experiment	28.5	5.5	33.5	3	4
1891	1	5	Experiment	C	23	05Experiment	15	5.5	19	3	4
1907	1	5	Experiment	C	24	05Experiment	33.5	5.5	47	3	4
1540	1	5	Experiment	D	1	05Experiment	33.5	7.5	0	4	4
1556	1	5	Experiment	D	2	05Experiment	31.5	7.5	0	4	4
1572	1	5	Experiment	D	3	05Experiment	40	7.5	41	4	4
1588	1	5	Experiment	D	4	05Experiment	34.5	7.5	37	4	4
1604	1	5	Experiment	D	5	05Experiment	16	7.5	30.5	4	4
1620	1	5	Experiment	D	6	05Experiment	28.5	7.5	37.5	4	4
1636	1	5	Experiment	D	7	05Experiment	39	7.5	40.5	4	4
1652	1	5	Experiment	D	8	05Experiment	34.5	7.5	34.5	4	4
1668	1	5	Experiment	D	9	05Experiment	29.5	7.5	35.5	4	4
1684	1	5	Experiment	D	10	05Experiment	39.5	7.5	43.5	4	4
1700	1	5	Experiment	D	11	05Experiment	36	7.5	35.5	4	4
1716	1	5	Experiment	D	12	05Experiment	37.5	7.5	41.5	4	4
1732	1	5	Experiment	D	13	05Experiment	30.5	7.5	42	4	4
1748	1	5	Experiment	D	14	05Experiment	35.5	7.5	32.5	4	4
1764	1	5	Experiment	D	15	05Experiment	36.5	7.5	34	4	4
1780	1	5	Experiment	D	16	05Experiment	35.5	7.5	33	4	4
1796	1	5	Experiment	D	17	05Experiment	37.5	7.5	38.5	4	4
1812	1	5	Experiment	D	18	05Experiment	37	7.5	41.5	4	4
1828	1	5	Experiment	D	19	05Experiment	40	7.5	48.5	4	4
1844	1	5	Experiment	D	20	05Experiment	35	7.5	37.5	4	4
1860	1	5	Experiment	D	21	05Experiment	5	7.5	35.5	4	4
1876	1	5	Experiment	D	22	05Experiment	34	7.5	57.5	4	4
1892	1	5	Experiment	D	23	05Experiment	31	7.5	42.5	4	4
1908	1	5	Experiment	D	24	05Experiment	32.5	7.5	39	4	4
1541	1	5	Experiment	E	1	05Experiment	36	9.5	0	5	4
1557	1	5	Experiment	E	2	05Experiment	27.5	9.5	0	5	4
1573	1	5	Experiment	E	3	05Experiment	34	9.5	29.5	5	4
1589	1	5	Experiment	E	4	05Experiment	11.5	9.5	20.5	5	4
1605	1	5	Experiment	E	5	05Experiment	32.5	9.5	47	5	4
1621	1	5	Experiment	E	6	05Experiment	43	9.5	58.5	5	4
1637	1	5	Experiment	E	7	05Experiment	31.5	9.5	32	5	4
1653	1	5	Experiment	E	8	05Experiment	17	9.5	25	5	4
1669	1	5	Experiment	E	9	05Experiment	35.5	9.5	26.5	5	4
1685	1	5	Experiment	E	10	05Experiment	35.5	9.5	31	5	4
1701	1	5	Experiment	E	11	05Experiment	70.5	9.5	62.5	5	4
1717	1	5	Experiment	E	12	05Experiment	38	9.5	41.5	5	4
1733	1	5	Experiment	E	13	05Experiment	33.5	9.5	34.5	5	4
1749	1	5	Experiment	E	14	05Experiment	31.5	9.5	31.5	5	4
1765	1	5	Experiment	E	15	05Experiment	29	9.5	22	5	4
1781	1	5	Experiment	E	16	05Experiment	35	9.5	42	5	4
1797	1	5	Experiment	E	17	05Experiment	36	9.5	41.5	5	4
1813	1	5	Experiment	E	18	05Experiment	33	9.5	37	5	4
1829	1	5	Experiment	E	19	05Experiment	32.5	9.5	37	5	4
1845	1	5	Experiment	E	20	05Experiment	29	9.5	32	5	4
1861	1	5	Experiment	E	21	05Experiment	26	9.5	21.5	5	4
1877	1	5	Experiment	E	22	05Experiment	28.5	9.5	39	5	4
1893	1	5	Experiment	E	23	05Experiment	49.5	9.5	62	5	4
1909	1	5	Experiment	E	24	05Experiment	34	9.5	48.5	5	4
1542	1	5	Experiment	F	1	05Experiment	29	11.5	26	6	4
1558	1	5	Experiment	F	2	05Experiment	31	11.5	34	6	4
1574	1	5	Experiment	F	3	05Experiment	27.5	11.5	32.5	6	4
1590	1	5	Experiment	F	4	05Experiment	29.5	11.5	35.5	6	4
1606	1	5	Experiment	F	5	05Experiment	30.5	11.5	36	6	4
1622	1	5	Experiment	F	6	05Experiment	30.5	11.5	33	6	4
1638	1	5	Experiment	F	7	05Experiment	35	11.5	35.5	6	4
1654	1	5	Experiment	F	8	05Experiment	22	11.5	27.5	6	4
1670	1	5	Experiment	F	9	05Experiment	7	11.5	8	6	4
1686	1	5	Experiment	F	10	05Experiment	12.5	11.5	11.5	6	4
1702	1	5	Experiment	F	11	05Experiment	34	11.5	38	6	4
1718	1	5	Experiment	F	12	05Experiment	31	11.5	29.5	6	4
1734	1	5	Experiment	F	13	05Experiment	67.5	11.5	78	6	4
1750	1	5	Experiment	F	14	05Experiment	35.5	11.5	35.5	6	4
1766	1	5	Experiment	F	15	05Experiment	31	11.5	34	6	4
1782	1	5	Experiment	F	16	05Experiment	32.5	11.5	40.5	6	4
1798	1	5	Experiment	F	17	05Experiment	30.5	11.5	30.5	6	4
1814	1	5	Experiment	F	18	05Experiment	31	11.5	38	6	4
1830	1	5	Experiment	F	19	05Experiment	34	11.5	45	6	4
1846	1	5	Experiment	F	20	05Experiment	34	11.5	39.5	6	4
1862	1	5	Experiment	F	21	05Experiment	29	11.5	37.5	6	4
1878	1	5	Experiment	F	22	05Experiment	42	11.5	54	6	4
1894	1	5	Experiment	F	23	05Experiment	30.5	11.5	36	6	4
1910	1	5	Experiment	F	24	05Experiment	32.5	11.5	38.5	6	4
1543	1	5	Experiment	G	1	05Experiment	39.5	13.5	33	7	4
1559	1	5	Experiment	G	2	05Experiment	27.5	13.5	34.5	7	4
1575	1	5	Experiment	G	3	05Experiment	22	13.5	32.5	7	4
1591	1	5	Experiment	G	4	05Experiment	28	13.5	32.5	7	4
1607	1	5	Experiment	G	5	05Experiment	29.5	13.5	33	7	4
1623	1	5	Experiment	G	6	05Experiment	30	13.5	32	7	4
1639	1	5	Experiment	G	7	05Experiment	33	13.5	32	7	4
1655	1	5	Experiment	G	8	05Experiment	33.5	13.5	30	7	4
1671	1	5	Experiment	G	9	05Experiment	30	13.5	24.5	7	4
1687	1	5	Experiment	G	10	05Experiment	31.5	13.5	30.5	7	4
1703	1	5	Experiment	G	11	05Experiment	17	13.5	14.5	7	4
1719	1	5	Experiment	G	12	05Experiment	35	13.5	32	7	4
1735	1	5	Experiment	G	13	05Experiment	30.5	13.5	28.5	7	4
1751	1	5	Experiment	G	14	05Experiment	25.5	13.5	26	7	4
1767	1	5	Experiment	G	15	05Experiment	31	13.5	37	7	4
1783	1	5	Experiment	G	16	05Experiment	30.5	13.5	34	7	4
1799	1	5	Experiment	G	17	05Experiment	30.5	13.5	32.5	7	4
1815	1	5	Experiment	G	18	05Experiment	31.5	13.5	42	7	4
1831	1	5	Experiment	G	19	05Experiment	33	13.5	40.5	7	4
1847	1	5	Experiment	G	20	05Experiment	32	13.5	39.5	7	4
1863	1	5	Experiment	G	21	05Experiment	0	13.5	0	7	4
1879	1	5	Experiment	G	22	05Experiment	25	13.5	35	7	4
1895	1	5	Experiment	G	23	05Experiment	35.5	13.5	50	7	4
1911	1	5	Experiment	G	24	05Experiment	30.5	13.5	38.5	7	4
1544	1	5	Experiment	H	1	05Experiment	29.5	15.5	43.5	8	4
1560	1	5	Experiment	H	2	05Experiment	28.5	15.5	36	8	4
1576	1	5	Experiment	H	3	05Experiment	28	15.5	31.5	8	4
1592	1	5	Experiment	H	4	05Experiment	27.5	15.5	32	8	4
1608	1	5	Experiment	H	5	05Experiment	28.5	15.5	30	8	4
1624	1	5	Experiment	H	6	05Experiment	30.5	15.5	28	8	4
1640	1	5	Experiment	H	7	05Experiment	34	15.5	37	8	4
1656	1	5	Experiment	H	8	05Experiment	33.5	15.5	32.5	8	4
1672	1	5	Experiment	H	9	05Experiment	37	15.5	35	8	4
1688	1	5	Experiment	H	10	05Experiment	31	15.5	30	8	4
1704	1	5	Experiment	H	11	05Experiment	40	15.5	52.5	8	4
1720	1	5	Experiment	H	12	05Experiment	29.5	15.5	26.5	8	4
1736	1	5	Experiment	H	13	05Experiment	33	15.5	23	8	4
1752	1	5	Experiment	H	14	05Experiment	7	15.5	27.5	8	4
1768	1	5	Experiment	H	15	05Experiment	26	15.5	26.5	8	4
1784	1	5	Experiment	H	16	05Experiment	29.5	15.5	29	8	4
1800	1	5	Experiment	H	17	05Experiment	28.5	15.5	31	8	4
1816	1	5	Experiment	H	18	05Experiment	28	15.5	27.5	8	4
1832	1	5	Experiment	H	19	05Experiment	29.5	15.5	37	8	4
1848	1	5	Experiment	H	20	05Experiment	32	15.5	37	8	4
1864	1	5	Experiment	H	21	05Experiment	42.5	15.5	54	8	4
1880	1	5	Experiment	H	22	05Experiment	24	15.5	33	8	4
1896	1	5	Experiment	H	23	05Experiment	30	15.5	34.5	8	4
1912	1	5	Experiment	H	24	05Experiment	30	15.5	33	8	4
1545	1	5	Experiment	I	1	05Experiment	28	17.5	37	9	4
1561	1	5	Experiment	I	2	05Experiment	20	17.5	28	9	4
1577	1	5	Experiment	I	3	05Experiment	22	17.5	28	9	4
1593	1	5	Experiment	I	4	05Experiment	28.5	17.5	34.5	9	4
1609	1	5	Experiment	I	5	05Experiment	27.5	17.5	22.5	9	4
1625	1	5	Experiment	I	6	05Experiment	28	17.5	26.5	9	4
1641	1	5	Experiment	I	7	05Experiment	36.5	17.5	43.5	9	4
1657	1	5	Experiment	I	8	05Experiment	30	17.5	32.5	9	4
1673	1	5	Experiment	I	9	05Experiment	45	17.5	53	9	4
1689	1	5	Experiment	I	10	05Experiment	46	17.5	50.5	9	4
1705	1	5	Experiment	I	11	05Experiment	27	17.5	22	9	4
1721	1	5	Experiment	I	12	05Experiment	30.5	17.5	27.5	9	4
1737	1	5	Experiment	I	13	05Experiment	32.5	17.5	27	9	4
1753	1	5	Experiment	I	14	05Experiment	28.5	17.5	21.5	9	4
1769	1	5	Experiment	I	15	05Experiment	24.5	17.5	21	9	4
1785	1	5	Experiment	I	16	05Experiment	26.5	17.5	30	9	4
1801	1	5	Experiment	I	17	05Experiment	26.5	17.5	28.5	9	4
1817	1	5	Experiment	I	18	05Experiment	30	17.5	33	9	4
1833	1	5	Experiment	I	19	05Experiment	44	17.5	53	9	4
1849	1	5	Experiment	I	20	05Experiment	29.5	17.5	24.5	9	4
1865	1	5	Experiment	I	21	05Experiment	22	17.5	31	9	4
1881	1	5	Experiment	I	22	05Experiment	25.5	17.5	29	9	4
1897	1	5	Experiment	I	23	05Experiment	28	17.5	27	9	4
1913	1	5	Experiment	I	24	05Experiment	32	17.5	46.5	9	4
1546	1	5	Experiment	J	1	05Experiment	26	19.5	35	10	4
1562	1	5	Experiment	J	2	05Experiment	27	19.5	29.5	10	4
1578	1	5	Experiment	J	3	05Experiment	30	19.5	45	10	4
1594	1	5	Experiment	J	4	05Experiment	25	19.5	30	10	4
1610	1	5	Experiment	J	5	05Experiment	24	19.5	24	10	4
1626	1	5	Experiment	J	6	05Experiment	25	19.5	26	10	4
1642	1	5	Experiment	J	7	05Experiment	47	19.5	50	10	4
1658	1	5	Experiment	J	8	05Experiment	29	19.5	26	10	4
1674	1	5	Experiment	J	9	05Experiment	28.5	19.5	26	10	4
1690	1	5	Experiment	J	10	05Experiment	25.5	19.5	21.5	10	4
1706	1	5	Experiment	J	11	05Experiment	31.5	19.5	33.5	10	4
1722	1	5	Experiment	J	12	05Experiment	26.5	19.5	21	10	4
1738	1	5	Experiment	J	13	05Experiment	27.5	19.5	24.5	10	4
1754	1	5	Experiment	J	14	05Experiment	29	19.5	25.5	10	4
1770	1	5	Experiment	J	15	05Experiment	41.5	19.5	45	10	4
1786	1	5	Experiment	J	16	05Experiment	28	19.5	25	10	4
1802	1	5	Experiment	J	17	05Experiment	27	19.5	27.5	10	4
1818	1	5	Experiment	J	18	05Experiment	31	19.5	30	10	4
1834	1	5	Experiment	J	19	05Experiment	45	19.5	51.5	10	4
1850	1	5	Experiment	J	20	05Experiment	3	19.5	6	10	4
1866	1	5	Experiment	J	21	05Experiment	1.5	19.5	7.5	10	4
1882	1	5	Experiment	J	22	05Experiment	23	19.5	20.5	10	4
1898	1	5	Experiment	J	23	05Experiment	25	19.5	23.5	10	4
1914	1	5	Experiment	J	24	05Experiment	26.5	19.5	30	10	4
1547	1	5	Experiment	K	1	05Experiment	23	21.5	34	11	4
1563	1	5	Experiment	K	2	05Experiment	21.5	21.5	30	11	4
1579	1	5	Experiment	K	3	05Experiment	21	21.5	28	11	4
1595	1	5	Experiment	K	4	05Experiment	23	21.5	25.5	11	4
1611	1	5	Experiment	K	5	05Experiment	25	21.5	27.5	11	4
1627	1	5	Experiment	K	6	05Experiment	24.5	21.5	33	11	4
1643	1	5	Experiment	K	7	05Experiment	25	21.5	25.5	11	4
1659	1	5	Experiment	K	8	05Experiment	28	21.5	27.5	11	4
1675	1	5	Experiment	K	9	05Experiment	27	21.5	27.5	11	4
1691	1	5	Experiment	K	10	05Experiment	24	21.5	23.5	11	4
1707	1	5	Experiment	K	11	05Experiment	28	21.5	25	11	4
1723	1	5	Experiment	K	12	05Experiment	23	21.5	19	11	4
1739	1	5	Experiment	K	13	05Experiment	34.5	21.5	32	11	4
1755	1	5	Experiment	K	14	05Experiment	31	21.5	20	11	4
1771	1	5	Experiment	K	15	05Experiment	8.5	21.5	5	11	4
1787	1	5	Experiment	K	16	05Experiment	25	21.5	29	11	4
1803	1	5	Experiment	K	17	05Experiment	16	21.5	13.5	11	4
1819	1	5	Experiment	K	18	05Experiment	25	21.5	23	11	4
1835	1	5	Experiment	K	19	05Experiment	32	21.5	34.5	11	4
1851	1	5	Experiment	K	20	05Experiment	26.5	21.5	29	11	4
1867	1	5	Experiment	K	21	05Experiment	19	21.5	14	11	4
1883	1	5	Experiment	K	22	05Experiment	23.5	21.5	26	11	4
1899	1	5	Experiment	K	23	05Experiment	23	21.5	23	11	4
1915	1	5	Experiment	K	24	05Experiment	24	21.5	32	11	4
1548	1	5	Experiment	L	1	05Experiment	21	23.5	37.5	12	4
1564	1	5	Experiment	L	2	05Experiment	16.5	23.5	26	12	4
1580	1	5	Experiment	L	3	05Experiment	18	23.5	14.5	12	4
1596	1	5	Experiment	L	4	05Experiment	21.5	23.5	28	12	4
1612	1	5	Experiment	L	5	05Experiment	21.5	23.5	28	12	4
1628	1	5	Experiment	L	6	05Experiment	22.5	23.5	28.5	12	4
1644	1	5	Experiment	L	7	05Experiment	23.5	23.5	24	12	4
1660	1	5	Experiment	L	8	05Experiment	24.5	23.5	23	12	4
1676	1	5	Experiment	L	9	05Experiment	31.5	23.5	28.5	12	4
1692	1	5	Experiment	L	10	05Experiment	37.5	23.5	35	12	4
1708	1	5	Experiment	L	11	05Experiment	13	23.5	12.5	12	4
1724	1	5	Experiment	L	12	05Experiment	27	23.5	27.5	12	4
1740	1	5	Experiment	L	13	05Experiment	27	23.5	18	12	4
1756	1	5	Experiment	L	14	05Experiment	22.5	23.5	26	12	4
1772	1	5	Experiment	L	15	05Experiment	26	23.5	29.5	12	4
1788	1	5	Experiment	L	16	05Experiment	0	23.5	0.5	12	4
1804	1	5	Experiment	L	17	05Experiment	23.5	23.5	29	12	4
1820	1	5	Experiment	L	18	05Experiment	16	23.5	23.5	12	4
1836	1	5	Experiment	L	19	05Experiment	49	23.5	42	12	4
1852	1	5	Experiment	L	20	05Experiment	0	23.5	0	12	4
1868	1	5	Experiment	L	21	05Experiment	25	23.5	29.5	12	4
1884	1	5	Experiment	L	22	05Experiment	0	23.5	1	12	4
1900	1	5	Experiment	L	23	05Experiment	30.5	23.5	31.5	12	4
1916	1	5	Experiment	L	24	05Experiment	29.5	23.5	35	12	4
1549	1	5	Experiment	M	1	05Experiment	15	25.5	29.5	13	4
1565	1	5	Experiment	M	2	05Experiment	13.5	25.5	31	13	4
1581	1	5	Experiment	M	3	05Experiment	33	25.5	38	13	4
1597	1	5	Experiment	M	4	05Experiment	20.5	25.5	24.5	13	4
1613	1	5	Experiment	M	5	05Experiment	21	25.5	28	13	4
1629	1	5	Experiment	M	6	05Experiment	19	25.5	23	13	4
1645	1	5	Experiment	M	7	05Experiment	21	25.5	23.5	13	4
1661	1	5	Experiment	M	8	05Experiment	40	25.5	38	13	4
1677	1	5	Experiment	M	9	05Experiment	25.5	25.5	28.5	13	4
1693	1	5	Experiment	M	10	05Experiment	24.5	25.5	24	13	4
1709	1	5	Experiment	M	11	05Experiment	49.5	25.5	52.5	13	4
1725	1	5	Experiment	M	12	05Experiment	36.5	25.5	41.5	13	4
1741	1	5	Experiment	M	13	05Experiment	25	25.5	23	13	4
1757	1	5	Experiment	M	14	05Experiment	23.5	25.5	24.5	13	4
1773	1	5	Experiment	M	15	05Experiment	22	25.5	24.5	13	4
1789	1	5	Experiment	M	16	05Experiment	22	25.5	25.5	13	4
1805	1	5	Experiment	M	17	05Experiment	22.5	25.5	26	13	4
1821	1	5	Experiment	M	18	05Experiment	23	25.5	21	13	4
1837	1	5	Experiment	M	19	05Experiment	22.5	25.5	20.5	13	4
1853	1	5	Experiment	M	20	05Experiment	24.5	25.5	26.5	13	4
1869	1	5	Experiment	M	21	05Experiment	20.5	25.5	23.5	13	4
1885	1	5	Experiment	M	22	05Experiment	0	25.5	0	13	4
1901	1	5	Experiment	M	23	05Experiment	22	25.5	25	13	4
1917	1	5	Experiment	M	24	05Experiment	42	25.5	54.5	13	4
1550	1	5	Experiment	N	1	05Experiment	7	27.5	24	14	4
1566	1	5	Experiment	N	2	05Experiment	9	27.5	22	14	4
1582	1	5	Experiment	N	3	05Experiment	16	27.5	22	14	4
1598	1	5	Experiment	N	4	05Experiment	15.5	27.5	25.5	14	4
1614	1	5	Experiment	N	5	05Experiment	24	27.5	29.5	14	4
1630	1	5	Experiment	N	6	05Experiment	19	27.5	25.5	14	4
1646	1	5	Experiment	N	7	05Experiment	20.5	27.5	23.5	14	4
1662	1	5	Experiment	N	8	05Experiment	20.5	27.5	22.5	14	4
1678	1	5	Experiment	N	9	05Experiment	30.5	27.5	34	14	4
1694	1	5	Experiment	N	10	05Experiment	19	27.5	24.5	14	4
1710	1	5	Experiment	N	11	05Experiment	43	27.5	44.5	14	4
1726	1	5	Experiment	N	12	05Experiment	22.5	27.5	26.5	14	4
1742	1	5	Experiment	N	13	05Experiment	20.5	27.5	19.5	14	4
1758	1	5	Experiment	N	14	05Experiment	2	27.5	26.5	14	4
1774	1	5	Experiment	N	15	05Experiment	21	27.5	22	14	4
1790	1	5	Experiment	N	16	05Experiment	26	27.5	37	14	4
1806	1	5	Experiment	N	17	05Experiment	21	27.5	25	14	4
1822	1	5	Experiment	N	18	05Experiment	21	27.5	21.5	14	4
1838	1	5	Experiment	N	19	05Experiment	18	27.5	23	14	4
1854	1	5	Experiment	N	20	05Experiment	15.5	27.5	20.5	14	4
1870	1	5	Experiment	N	21	05Experiment	17.5	27.5	23	14	4
1886	1	5	Experiment	N	22	05Experiment	15	27.5	19.5	14	4
1902	1	5	Experiment	N	23	05Experiment	15.5	27.5	22	14	4
1918	1	5	Experiment	N	24	05Experiment	20	27.5	29	14	4
1551	1	5	Experiment	O	1	05Experiment	2.5	29.5	24.5	15	4
1567	1	5	Experiment	O	2	05Experiment	14	29.5	26	15	4
1583	1	5	Experiment	O	3	05Experiment	14	29.5	23.5	15	4
1599	1	5	Experiment	O	4	05Experiment	10.5	29.5	18	15	4
1615	1	5	Experiment	O	5	05Experiment	16.5	29.5	22.5	15	4
1631	1	5	Experiment	O	6	05Experiment	25	29.5	31.5	15	4
1647	1	5	Experiment	O	7	05Experiment	21	29.5	33.5	15	4
1663	1	5	Experiment	O	8	05Experiment	35.5	29.5	43	15	4
1679	1	5	Experiment	O	9	05Experiment	22.5	29.5	24.5	15	4
1695	1	5	Experiment	O	10	05Experiment	17.5	29.5	21.5	15	4
1711	1	5	Experiment	O	11	05Experiment	28	29.5	30.5	15	4
1727	1	5	Experiment	O	12	05Experiment	35.5	29.5	36	15	4
1743	1	5	Experiment	O	13	05Experiment	18	29.5	30	15	4
1759	1	5	Experiment	O	14	05Experiment	17.5	29.5	14	15	4
1775	1	5	Experiment	O	15	05Experiment	18	29.5	19	15	4
1791	1	5	Experiment	O	16	05Experiment	21	29.5	25.5	15	4
1807	1	5	Experiment	O	17	05Experiment	32	29.5	39.5	15	4
1823	1	5	Experiment	O	18	05Experiment	21.5	29.5	32.5	15	4
1839	1	5	Experiment	O	19	05Experiment	20	29.5	27	15	4
1855	1	5	Experiment	O	20	05Experiment	5	29.5	17.5	15	4
1871	1	5	Experiment	O	21	05Experiment	11	29.5	19	15	4
1887	1	5	Experiment	O	22	05Experiment	14.5	29.5	23.5	15	4
1903	1	5	Experiment	O	23	05Experiment	7.5	29.5	14	15	4
1919	1	5	Experiment	O	24	05Experiment	13.5	29.5	27	15	4
1552	1	5	Experiment	P	1	05Experiment	19	31.5	48	16	4
1568	1	5	Experiment	P	2	05Experiment	21	31.5	38	16	4
1584	1	5	Experiment	P	3	05Experiment	23.5	31.5	38	16	4
1600	1	5	Experiment	P	4	05Experiment	26	31.5	41.5	16	4
1616	1	5	Experiment	P	5	05Experiment	22.5	31.5	35.5	16	4
1632	1	5	Experiment	P	6	05Experiment	25.5	31.5	31.5	16	4
1648	1	5	Experiment	P	7	05Experiment	24	31.5	32.5	16	4
1664	1	5	Experiment	P	8	05Experiment	22.5	31.5	32	16	4
1680	1	5	Experiment	P	9	05Experiment	14	31.5	18.5	16	4
1696	1	5	Experiment	P	10	05Experiment	32.5	31.5	38.5	16	4
1712	1	5	Experiment	P	11	05Experiment	26.5	31.5	37.5	16	4
1728	1	5	Experiment	P	12	05Experiment	0	31.5	6.5	16	4
1744	1	5	Experiment	P	13	05Experiment	23	31.5	26	16	4
1760	1	5	Experiment	P	14	05Experiment	25	31.5	35	16	4
1776	1	5	Experiment	P	15	05Experiment	34.5	31.5	45	16	4
1792	1	5	Experiment	P	16	05Experiment	28	31.5	30	16	4
1808	1	5	Experiment	P	17	05Experiment	28.5	31.5	36	16	4
1824	1	5	Experiment	P	18	05Experiment	27	31.5	33	16	4
1840	1	5	Experiment	P	19	05Experiment	25	31.5	33.5	16	4
1856	1	5	Experiment	P	20	05Experiment	33	31.5	39.5	16	4
1872	1	5	Experiment	P	21	05Experiment	37.5	31.5	52.5	16	4
1888	1	5	Experiment	P	22	05Experiment	17.5	31.5	39.5	16	4
1904	1	5	Experiment	P	23	05Experiment	6	31.5	19	16	4
1920	1	5	Experiment	P	24	05Experiment	24	31.5	36	16	4
1	2	1	Experiment	A	1	01Experiment	22	1.5	90.5	1	15
17	2	1	Experiment	A	2	01Experiment	19	1.5	71	1	15
33	2	1	Experiment	A	3	01Experiment	15.5	1.5	71.5	1	15
49	2	1	Experiment	A	4	01Experiment	20.5	1.5	64.5	1	15
65	2	1	Experiment	A	5	01Experiment	20.5	1.5	83.5	1	15
81	2	1	Experiment	A	6	01Experiment	19	1.5	72	1	15
97	2	1	Experiment	A	7	01Experiment	21	1.5	81	1	15
113	2	1	Experiment	A	8	01Experiment	18.5	1.5	52.5	1	15
129	2	1	Experiment	A	9	01Experiment	19	1.5	69	1	15
145	2	1	Experiment	A	10	01Experiment	17	1.5	72	1	15
161	2	1	Experiment	A	11	01Experiment	24.5	1.5	71.5	1	15
177	2	1	Experiment	A	12	01Experiment	24	1.5	80.5	1	15
193	2	1	Experiment	A	13	01Experiment	22	1.5	71.5	1	15
209	2	1	Experiment	A	14	01Experiment	21.5	1.5	72	1	15
225	2	1	Experiment	A	15	01Experiment	20.5	1.5	72.5	1	15
241	2	1	Experiment	A	16	01Experiment	18.5	1.5	69	1	15
257	2	1	Experiment	A	17	01Experiment	21.5	1.5	74	1	15
273	2	1	Experiment	A	18	01Experiment	17	1.5	75	1	15
289	2	1	Experiment	A	19	01Experiment	17.5	1.5	68.5	1	15
305	2	1	Experiment	A	20	01Experiment	19	1.5	68.5	1	15
321	2	1	Experiment	A	21	01Experiment	12.5	1.5	73.5	1	15
337	2	1	Experiment	A	22	01Experiment	17.5	1.5	72.5	1	15
353	2	1	Experiment	A	23	01Experiment	16	1.5	69.5	1	15
369	2	1	Experiment	A	24	01Experiment	28.5	1.5	96	1	15
2	2	1	Experiment	B	1	01Experiment	18	3.5	57.5	2	15
18	2	1	Experiment	B	2	01Experiment	13.5	3.5	49.5	2	15
34	2	1	Experiment	B	3	01Experiment	15.5	3.5	57	2	15
50	2	1	Experiment	B	4	01Experiment	16	3.5	62.5	2	15
66	2	1	Experiment	B	5	01Experiment	15.5	3.5	52.5	2	15
82	2	1	Experiment	B	6	01Experiment	16.5	3.5	52	2	15
98	2	1	Experiment	B	7	01Experiment	15.5	3.5	58.5	2	15
114	2	1	Experiment	B	8	01Experiment	16.5	3.5	65.5	2	15
130	2	1	Experiment	B	9	01Experiment	12.5	3.5	40	2	15
146	2	1	Experiment	B	10	01Experiment	15	3.5	43	2	15
162	2	1	Experiment	B	11	01Experiment	18	3.5	54.5	2	15
178	2	1	Experiment	B	12	01Experiment	17	3.5	47	2	15
194	2	1	Experiment	B	13	01Experiment	22	3.5	64	2	15
210	2	1	Experiment	B	14	01Experiment	18	3.5	53	2	15
226	2	1	Experiment	B	15	01Experiment	17	3.5	60	2	15
242	2	1	Experiment	B	16	01Experiment	17.5	3.5	59	2	15
258	2	1	Experiment	B	17	01Experiment	13.5	3.5	44.5	2	15
274	2	1	Experiment	B	18	01Experiment	18.5	3.5	52.5	2	15
290	2	1	Experiment	B	19	01Experiment	16.5	3.5	57	2	15
306	2	1	Experiment	B	20	01Experiment	16	3.5	53	2	15
322	2	1	Experiment	B	21	01Experiment	17	3.5	51.5	2	15
338	2	1	Experiment	B	22	01Experiment	16.5	3.5	57	2	15
354	2	1	Experiment	B	23	01Experiment	16.5	3.5	55.5	2	15
370	2	1	Experiment	B	24	01Experiment	26	3.5	76	2	15
3	2	1	Experiment	C	1	01Experiment	14	5.5	71	3	15
19	2	1	Experiment	C	2	01Experiment	13	5.5	51	3	15
35	2	1	Experiment	C	3	01Experiment	16	5.5	39	3	15
51	2	1	Experiment	C	4	01Experiment	0	5.5	12.5	3	15
67	2	1	Experiment	C	5	01Experiment	16.5	5.5	71	3	15
83	2	1	Experiment	C	6	01Experiment	16.5	5.5	54	3	15
99	2	1	Experiment	C	7	01Experiment	10.5	5.5	37	3	15
115	2	1	Experiment	C	8	01Experiment	8	5.5	34	3	15
131	2	1	Experiment	C	9	01Experiment	9.5	5.5	59	3	15
147	2	1	Experiment	C	10	01Experiment	11.5	5.5	51	3	15
163	2	1	Experiment	C	11	01Experiment	13.5	5.5	49	3	15
179	2	1	Experiment	C	12	01Experiment	25.5	5.5	74	3	15
195	2	1	Experiment	C	13	01Experiment	14	5.5	52	3	15
211	2	1	Experiment	C	14	01Experiment	14.5	5.5	42.5	3	15
227	2	1	Experiment	C	15	01Experiment	14.5	5.5	49	3	15
243	2	1	Experiment	C	16	01Experiment	16.5	5.5	50.5	3	15
259	2	1	Experiment	C	17	01Experiment	14.5	5.5	50.5	3	15
275	2	1	Experiment	C	18	01Experiment	12.5	5.5	49	3	15
291	2	1	Experiment	C	19	01Experiment	16.5	5.5	40	3	15
307	2	1	Experiment	C	20	01Experiment	10	5.5	52	3	15
323	2	1	Experiment	C	21	01Experiment	14	5.5	41.5	3	15
339	2	1	Experiment	C	22	01Experiment	12	5.5	51.5	3	15
355	2	1	Experiment	C	23	01Experiment	13	5.5	41	3	15
371	2	1	Experiment	C	24	01Experiment	16.5	5.5	71	3	15
4	2	1	Experiment	D	1	01Experiment	13.5	7.5	76.5	4	15
20	2	1	Experiment	D	2	01Experiment	9	7.5	52.5	4	15
36	2	1	Experiment	D	3	01Experiment	7.5	7.5	51.5	4	15
52	2	1	Experiment	D	4	01Experiment	9	7.5	47	4	15
68	2	1	Experiment	D	5	01Experiment	3	7.5	41.5	4	15
84	2	1	Experiment	D	6	01Experiment	11	7.5	44.5	4	15
[truncated: 6,834 more rows]

## Sheet: YPD based conditions
RXPY:	X	Y
	EXP	Plate	Type	Row	Col	PlateNames	Exp Size	RowNumeric	Ctrl Size	RowNumeric	ORDER OF THE COLUMN IN THE HEATMAP (internal use only)	PINNING error
1	1	1	Experiment	A	1	01Experiment	100.5	1.5	50	1	1
17	1	1	Experiment	A	2	01Experiment	46.5	1.5	32	1	1
33	1	1	Experiment	A	3	01Experiment	68.5	1.5	37.5	1	1
49	1	1	Experiment	A	4	01Experiment	79	1.5	35.5	1	1
65	1	1	Experiment	A	5	01Experiment	169	1.5	69.5	1	1
81	1	1	Experiment	A	6	01Experiment	112	1.5	45	1	1
97	1	1	Experiment	A	7	01Experiment	137	1.5	57	1	1
113	1	1	Experiment	A	8	01Experiment	73	1.5	31	1	1
129	1	1	Experiment	A	9	01Experiment	77	1.5	25.5	1	1
145	1	1	Experiment	A	10	01Experiment	118.5	1.5	55	1	1
161	1	1	Experiment	A	11	01Experiment	90.5	1.5	48.5	1	1
177	1	1	Experiment	A	12	01Experiment	162	1.5	73.5	1	1
193	1	1	Experiment	A	13	01Experiment	100	1.5	49	1	1
209	1	1	Experiment	A	14	01Experiment	98.5	1.5	52.5	1	1
225	1	1	Experiment	A	15	01Experiment	101.5	1.5	49	1	1
241	1	1	Experiment	A	16	01Experiment	117	1.5	54.5	1	1
257	1	1	Experiment	A	17	01Experiment	130	1.5	61	1	1
273	1	1	Experiment	A	18	01Experiment	135	1.5	85.5	1	1
289	1	1	Experiment	A	19	01Experiment	119	1.5	50	1	1
305	1	1	Experiment	A	20	01Experiment	95	1.5	44.5	1	1
321	1	1	Experiment	A	21	01Experiment	121.5	1.5	31.5	1	1
337	1	1	Experiment	A	22	01Experiment	135	1.5	49.5	1	1
353	1	1	Experiment	A	23	01Experiment	83.5	1.5	46	1	1
369	1	1	Experiment	A	24	01Experiment	26	1.5	65.5	1	1	X
2	1	1	Experiment	B	1	01Experiment	75.5	3.5	42	2	1
18	1	1	Experiment	B	2	01Experiment	51	3.5	31	2	1
34	1	1	Experiment	B	3	01Experiment	71	3.5	39.5	2	1
50	1	1	Experiment	B	4	01Experiment	104	3.5	45	2	1
66	1	1	Experiment	B	5	01Experiment	87.5	3.5	44	2	1
82	1	1	Experiment	B	6	01Experiment	88.5	3.5	45.5	2	1
98	1	1	Experiment	B	7	01Experiment	88	3.5	55	2	1
114	1	1	Experiment	B	8	01Experiment	102	3.5	48	2	1
130	1	1	Experiment	B	9	01Experiment	65	3.5	17.5	2	1
146	1	1	Experiment	B	10	01Experiment	78.5	3.5	48	2	1
162	1	1	Experiment	B	11	01Experiment	102	3.5	55	2	1
178	1	1	Experiment	B	12	01Experiment	98	3.5	50	2	1
194	1	1	Experiment	B	13	01Experiment	128	3.5	61	2	1
210	1	1	Experiment	B	14	01Experiment	100	3.5	50.5	2	1
226	1	1	Experiment	B	15	01Experiment	100	3.5	54	2	1
242	1	1	Experiment	B	16	01Experiment	98	3.5	51.5	2	1
258	1	1	Experiment	B	17	01Experiment	80.5	3.5	40.5	2	1
274	1	1	Experiment	B	18	01Experiment	94	3.5	52	2	1
290	1	1	Experiment	B	19	01Experiment	115	3.5	57.5	2	1
306	1	1	Experiment	B	20	01Experiment	107	3.5	53	2	1
322	1	1	Experiment	B	21	01Experiment	115.5	3.5	58	2	1
338	1	1	Experiment	B	22	01Experiment	111	3.5	50.5	2	1
354	1	1	Experiment	B	23	01Experiment	97.5	3.5	55.5	2	1
370	1	1	Experiment	B	24	01Experiment	59	3.5	44.5	2	1	X
3	1	1	Experiment	C	1	01Experiment	81	5.5	32	3	1
19	1	1	Experiment	C	2	01Experiment	77.5	5.5	34.5	3	1
35	1	1	Experiment	C	3	01Experiment	69.5	5.5	38	3	1
51	1	1	Experiment	C	4	01Experiment	45.5	5.5	19	3	1
67	1	1	Experiment	C	5	01Experiment	104	5.5	75.5	3	1
83	1	1	Experiment	C	6	01Experiment	118	5.5	48	3	1
99	1	1	Experiment	C	7	01Experiment	75	5.5	22.5	3	1
115	1	1	Experiment	C	8	01Experiment	52	5.5	27	3	1
131	1	1	Experiment	C	9	01Experiment	89	5.5	52	3	1
147	1	1	Experiment	C	10	01Experiment	98.5	5.5	43	3	1
163	1	1	Experiment	C	11	01Experiment	111	5.5	45.5	3	1
179	1	1	Experiment	C	12	01Experiment	118.5	5.5	87	3	1
195	1	1	Experiment	C	13	01Experiment	98.5	5.5	46.5	3	1
211	1	1	Experiment	C	14	01Experiment	102.5	5.5	40	3	1
227	1	1	Experiment	C	15	01Experiment	79	5.5	32	3	1
243	1	1	Experiment	C	16	01Experiment	100	5.5	47.5	3	1
259	1	1	Experiment	C	17	01Experiment	93	5.5	47.5	3	1
275	1	1	Experiment	C	18	01Experiment	100	5.5	49	3	1
291	1	1	Experiment	C	19	01Experiment	93.5	5.5	67	3	1
307	1	1	Experiment	C	20	01Experiment	96.5	5.5	47.5	3	1
323	1	1	Experiment	C	21	01Experiment	112.5	5.5	43	3	1
339	1	1	Experiment	C	22	01Experiment	117.5	5.5	52	3	1
355	1	1	Experiment	C	23	01Experiment	65	5.5	34	3	1
371	1	1	Experiment	C	24	01Experiment	0	5.5	42	3	1	X
4	1	1	Experiment	D	1	01Experiment	99.5	7.5	38.5	4	1
20	1	1	Experiment	D	2	01Experiment	89.5	7.5	39	4	1
36	1	1	Experiment	D	3	01Experiment	97.5	7.5	39.5	4	1
52	1	1	Experiment	D	4	01Experiment	93.5	7.5	35	4	1
68	1	1	Experiment	D	5	01Experiment	69.5	7.5	31	4	1
84	1	1	Experiment	D	6	01Experiment	65.5	7.5	24	4	1
100	1	1	Experiment	D	7	01Experiment	95.5	7.5	46	4	1
116	1	1	Experiment	D	8	01Experiment	104.5	7.5	37.5	4	1
132	1	1	Experiment	D	9	01Experiment	2.5	7.5	14.5	4	1
148	1	1	Experiment	D	10	01Experiment	89	7.5	45	4	1
164	1	1	Experiment	D	11	01Experiment	104.5	7.5	49	4	1
180	1	1	Experiment	D	12	01Experiment	103.5	7.5	52	4	1
196	1	1	Experiment	D	13	01Experiment	76.5	7.5	38.5	4	1
212	1	1	Experiment	D	14	01Experiment	94	7.5	47	4	1
228	1	1	Experiment	D	15	01Experiment	90.5	7.5	45	4	1
244	1	1	Experiment	D	16	01Experiment	92.5	7.5	46.5	4	1
260	1	1	Experiment	D	17	01Experiment	92.5	7.5	45.5	4	1
276	1	1	Experiment	D	18	01Experiment	78.5	7.5	36.5	4	1
292	1	1	Experiment	D	19	01Experiment	113	7.5	45	4	1
308	1	1	Experiment	D	20	01Experiment	85.5	7.5	44.5	4	1
324	1	1	Experiment	D	21	01Experiment	46	7.5	35.5	4	1
340	1	1	Experiment	D	22	01Experiment	95	7.5	70	4	1
356	1	1	Experiment	D	23	01Experiment	116	7.5	52.5	4	1
372	1	1	Experiment	D	24	01Experiment	75	7.5	44.5	4	1	X
5	1	1	Experiment	E	1	01Experiment	100.5	9.5	33.5	5	1
21	1	1	Experiment	E	2	01Experiment	76.5	9.5	32.5	5	1
37	1	1	Experiment	E	3	01Experiment	120	9.5	54.5	5	1
53	1	1	Experiment	E	4	01Experiment	89	9.5	34	5	1
69	1	1	Experiment	E	5	01Experiment	82	9.5	49	5	1
85	1	1	Experiment	E	6	01Experiment	139	9.5	53.5	5	1
101	1	1	Experiment	E	7	01Experiment	85.5	9.5	35	5	1
117	1	1	Experiment	E	8	01Experiment	65.5	9.5	23	5	1
133	1	1	Experiment	E	9	01Experiment	74.5	9.5	25	5	1
149	1	1	Experiment	E	10	01Experiment	85.5	9.5	46	5	1
165	1	1	Experiment	E	11	01Experiment	129	9.5	61.5	5	1
181	1	1	Experiment	E	12	01Experiment	111.5	9.5	48	5	1
197	1	1	Experiment	E	13	01Experiment	100	9.5	45.5	5	1
213	1	1	Experiment	E	14	01Experiment	96.5	9.5	45	5	1
229	1	1	Experiment	E	15	01Experiment	95.5	9.5	23.5	5	1
245	1	1	Experiment	E	16	01Experiment	111.5	9.5	47.5	5	1
261	1	1	Experiment	E	17	01Experiment	106	9.5	50.5	5	1
277	1	1	Experiment	E	18	01Experiment	93.5	9.5	42	5	1
293	1	1	Experiment	E	19	01Experiment	91	9.5	39.5	5	1
309	1	1	Experiment	E	20	01Experiment	80.5	9.5	41	5	1
325	1	1	Experiment	E	21	01Experiment	0.5	9.5	36.5	5	1
341	1	1	Experiment	E	22	01Experiment	99.5	9.5	43.5	5	1
357	1	1	Experiment	E	23	01Experiment	120	9.5	61.5	5	1
373	1	1	Experiment	E	24	01Experiment	50.5	9.5	62	5	1	X
6	1	1	Experiment	F	1	01Experiment	78.5	11.5	33.5	6	1
22	1	1	Experiment	F	2	01Experiment	78	11.5	31.5	6	1
38	1	1	Experiment	F	3	01Experiment	72.5	11.5	29.5	6	1
54	1	1	Experiment	F	4	01Experiment	88	11.5	31.5	6	1
70	1	1	Experiment	F	5	01Experiment	84.5	11.5	35.5	6	1
86	1	1	Experiment	F	6	01Experiment	92	11.5	32.5	6	1
102	1	1	Experiment	F	7	01Experiment	84.5	11.5	34.5	6	1
118	1	1	Experiment	F	8	01Experiment	52	11.5	35	6	1
134	1	1	Experiment	F	9	01Experiment	3	11.5	0	6	1
150	1	1	Experiment	F	10	01Experiment	29.5	11.5	10.5	6	1
166	1	1	Experiment	F	11	01Experiment	101	11.5	46.5	6	1
182	1	1	Experiment	F	12	01Experiment	80	11.5	40.5	6	1
198	1	1	Experiment	F	13	01Experiment	84	11.5	78	6	1
214	1	1	Experiment	F	14	01Experiment	100	11.5	40.5	6	1
230	1	1	Experiment	F	15	01Experiment	89.5	11.5	37	6	1
246	1	1	Experiment	F	16	01Experiment	93.5	11.5	38.5	6	1
262	1	1	Experiment	F	17	01Experiment	76.5	11.5	30.5	6	1
278	1	1	Experiment	F	18	01Experiment	92.5	11.5	37	6	1
294	1	1	Experiment	F	19	01Experiment	98.5	11.5	43.5	6	1
310	1	1	Experiment	F	20	01Experiment	101	11.5	39.5	6	1
326	1	1	Experiment	F	21	01Experiment	85.5	11.5	46.5	6	1
342	1	1	Experiment	F	22	01Experiment	146	11.5	61	6	1
358	1	1	Experiment	F	23	01Experiment	106.5	11.5	48	6	1
374	1	1	Experiment	F	24	01Experiment	71	11.5	37.5	6	1
7	1	1	Experiment	G	1	01Experiment	97.5	13.5	62	7	1
23	1	1	Experiment	G	2	01Experiment	76	13.5	27	7	1
39	1	1	Experiment	G	3	01Experiment	95	13.5	26	7	1
55	1	1	Experiment	G	4	01Experiment	83	13.5	29.5	7	1
71	1	1	Experiment	G	5	01Experiment	72	13.5	33.5	7	1
87	1	1	Experiment	G	6	01Experiment	71.5	13.5	30	7	1
103	1	1	Experiment	G	7	01Experiment	98.5	13.5	37.5	7	1
119	1	1	Experiment	G	8	01Experiment	104	13.5	37	7	1
135	1	1	Experiment	G	9	01Experiment	75	13.5	28.5	7	1
151	1	1	Experiment	G	10	01Experiment	91.5	13.5	32.5	7	1
167	1	1	Experiment	G	11	01Experiment	42	13.5	16	7	1
183	1	1	Experiment	G	12	01Experiment	82	13.5	38	7	1
199	1	1	Experiment	G	13	01Experiment	73	13.5	36	7	1
215	1	1	Experiment	G	14	01Experiment	68.5	13.5	39	7	1
231	1	1	Experiment	G	15	01Experiment	77.5	13.5	38	7	1
247	1	1	Experiment	G	16	01Experiment	85	13.5	35.5	7	1
263	1	1	Experiment	G	17	01Experiment	83.5	13.5	35	7	1
279	1	1	Experiment	G	18	01Experiment	85	13.5	40	7	1
295	1	1	Experiment	G	19	01Experiment	103.5	13.5	40.5	7	1
311	1	1	Experiment	G	20	01Experiment	82.5	13.5	39.5	7	1
327	1	1	Experiment	G	21	01Experiment	91	13.5	37	7	1
343	1	1	Experiment	G	22	01Experiment	90	13.5	38	7	1
359	1	1	Experiment	G	23	01Experiment	117	13.5	64	7	1
375	1	1	Experiment	G	24	01Experiment	68.5	13.5	27	7	1
8	1	1	Experiment	H	1	01Experiment	99.5	15.5	33.5	8	1
24	1	1	Experiment	H	2	01Experiment	87	15.5	29.5	8	1
40	1	1	Experiment	H	3	01Experiment	72.5	15.5	27.5	8	1
56	1	1	Experiment	H	4	01Experiment	75.5	15.5	31	8	1
72	1	1	Experiment	H	5	01Experiment	76.5	15.5	30.5	8	1
88	1	1	Experiment	H	6	01Experiment	86.5	15.5	31	8	1
104	1	1	Experiment	H	7	01Experiment	79.5	15.5	34	8	1
120	1	1	Experiment	H	8	01Experiment	82	15.5	38.5	8	1
136	1	1	Experiment	H	9	01Experiment	94.5	15.5	36	8	1
152	1	1	Experiment	H	10	01Experiment	70.5	15.5	38	8	1
168	1	1	Experiment	H	11	01Experiment	88.5	15.5	40	8	1
184	1	1	Experiment	H	12	01Experiment	76	15.5	37	8	1
200	1	1	Experiment	H	13	01Experiment	74.5	15.5	40	8	1
216	1	1	Experiment	H	14	01Experiment	79	15.5	36.5	8	1
232	1	1	Experiment	H	15	01Experiment	76.5	15.5	22.5	8	1
248	1	1	Experiment	H	16	01Experiment	67	15.5	36	8	1
264	1	1	Experiment	H	17	01Experiment	68.5	15.5	38	8	1
280	1	1	Experiment	H	18	01Experiment	82	15.5	31	8	1
296	1	1	Experiment	H	19	01Experiment	95	15.5	36.5	8	1
312	1	1	Experiment	H	20	01Experiment	80	15.5	39.5	8	1
328	1	1	Experiment	H	21	01Experiment	94	15.5	57.5	8	1
344	1	1	Experiment	H	22	01Experiment	65	15.5	32	8	1
360	1	1	Experiment	H	23	01Experiment	73.5	15.5	26.5	8	1
376	1	1	Experiment	H	24	01Experiment	56	15.5	22	8	1
9	1	1	Experiment	I	1	01Experiment	76	17.5	25	9	1
25	1	1	Experiment	I	2	01Experiment	66	17.5	25.5	9	1
41	1	1	Experiment	I	3	01Experiment	46	17.5	21	9	1
57	1	1	Experiment	I	4	01Experiment	78.5	17.5	27.5	9	1
73	1	1	Experiment	I	5	01Experiment	64	17.5	15.5	9	1
89	1	1	Experiment	I	6	01Experiment	51	17.5	27	9	1
105	1	1	Experiment	I	7	01Experiment	86	17.5	37.5	9	1
121	1	1	Experiment	I	8	01Experiment	77	17.5	33.5	9	1
137	1	1	Experiment	I	9	01Experiment	88.5	17.5	44	9	1
153	1	1	Experiment	I	10	01Experiment	100.5	17.5	37	9	1
169	1	1	Experiment	I	11	01Experiment	67.5	17.5	35	9	1
185	1	1	Experiment	I	12	01Experiment	64	17.5	30.5	9	1
201	1	1	Experiment	I	13	01Experiment	95.5	17.5	37.5	9	1
217	1	1	Experiment	I	14	01Experiment	69	17.5	31.5	9	1
233	1	1	Experiment	I	15	01Experiment	43.5	17.5	17.5	9	1
249	1	1	Experiment	I	16	01Experiment	65	17.5	37	9	1
265	1	1	Experiment	I	17	01Experiment	84	17.5	30.5	9	1
281	1	1	Experiment	I	18	01Experiment	67	17.5	27	9	1
297	1	1	Experiment	I	19	01Experiment	83.5	17.5	52.5	9	1
313	1	1	Experiment	I	20	01Experiment	81	17.5	27	9	1
329	1	1	Experiment	I	21	01Experiment	47.5	17.5	32	9	1
345	1	1	Experiment	I	22	01Experiment	69.5	17.5	23	9	1
361	1	1	Experiment	I	23	01Experiment	30	17.5	12	9	1
377	1	1	Experiment	I	24	01Experiment	69	17.5	24	9	1
10	1	1	Experiment	J	1	01Experiment	77	19.5	26.5	10	1
26	1	1	Experiment	J	2	01Experiment	73	19.5	26.5	10	1
42	1	1	Experiment	J	3	01Experiment	91	19.5	34	10	1
58	1	1	Experiment	J	4	01Experiment	75	19.5	24	10	1
74	1	1	Experiment	J	5	01Experiment	61.5	19.5	25.5	10	1
90	1	1	Experiment	J	6	01Experiment	81	19.5	26	10	1
106	1	1	Experiment	J	7	01Experiment	70.5	19.5	41	10	1
122	1	1	Experiment	J	8	01Experiment	36	19.5	33	10	1
138	1	1	Experiment	J	9	01Experiment	59	19.5	33	10	1
154	1	1	Experiment	J	10	01Experiment	59.5	19.5	25	10	1
170	1	1	Experiment	J	11	01Experiment	64	19.5	28.5	10	1
186	1	1	Experiment	J	12	01Experiment	49.5	19.5	31.5	10	1
202	1	1	Experiment	J	13	01Experiment	68.5	19.5	29	10	1
218	1	1	Experiment	J	14	01Experiment	65.5	19.5	35.5	10	1
234	1	1	Experiment	J	15	01Experiment	74	19.5	31.5	10	1
250	1	1	Experiment	J	16	01Experiment	64	19.5	28.5	10	1
266	1	1	Experiment	J	17	01Experiment	63.5	19.5	33	10	1
282	1	1	Experiment	J	18	01Experiment	83.5	19.5	34.5	10	1
298	1	1	Experiment	J	19	01Experiment	93.5	19.5	49	10	1
314	1	1	Experiment	J	20	01Experiment	43	19.5	25.5	10	1
330	1	1	Experiment	J	21	01Experiment	37.5	19.5	38.5	10	1
346	1	1	Experiment	J	22	01Experiment	54	19.5	23	10	1
362	1	1	Experiment	J	23	01Experiment	72	19.5	28	10	1
378	1	1	Experiment	J	24	01Experiment	69.5	19.5	16	10	1
11	1	1	Experiment	K	1	01Experiment	61.5	21.5	24.5	11	1
27	1	1	Experiment	K	2	01Experiment	62	21.5	19.5	11	1
43	1	1	Experiment	K	3	01Experiment	67.5	21.5	19	11	1
59	1	1	Experiment	K	4	01Experiment	48	21.5	20.5	11	1
75	1	1	Experiment	K	5	01Experiment	73.5	21.5	20	11	1
91	1	1	Experiment	K	6	01Experiment	78	21.5	31.5	11	1
107	1	1	Experiment	K	7	01Experiment	49.5	21.5	22.5	11	1
123	1	1	Experiment	K	8	01Experiment	71	21.5	31.5	11	1
139	1	1	Experiment	K	9	01Experiment	55.5	21.5	34	11	1
155	1	1	Experiment	K	10	01Experiment	47.5	21.5	36	11	1
171	1	1	Experiment	K	11	01Experiment	82.5	21.5	34	11	1
187	1	1	Experiment	K	12	01Experiment	56.5	21.5	37.5	11	1
203	1	1	Experiment	K	13	01Experiment	63.5	21.5	21.5	11	1
219	1	1	Experiment	K	14	01Experiment	64	21.5	28	11	1
235	1	1	Experiment	K	15	01Experiment	13	21.5	1	11	1
251	1	1	Experiment	K	16	01Experiment	85.5	21.5	32	11	1
267	1	1	Experiment	K	17	01Experiment	37.5	21.5	17.5	11	1
283	1	1	Experiment	K	18	01Experiment	68.5	21.5	32	11	1
299	1	1	Experiment	K	19	01Experiment	56	21.5	41.5	11	1
315	1	1	Experiment	K	20	01Experiment	76.5	21.5	37.5	11	1
331	1	1	Experiment	K	21	01Experiment	45.5	21.5	19	11	1
347	1	1	Experiment	K	22	01Experiment	78	21.5	31	11	1
363	1	1	Experiment	K	23	01Experiment	47.5	21.5	21.5	11	1
379	1	1	Experiment	K	24	01Experiment	61.5	21.5	37.5	11	1
12	1	1	Experiment	L	1	01Experiment	79	23.5	26.5	12	1
28	1	1	Experiment	L	2	01Experiment	43	23.5	24	12	1
44	1	1	Experiment	L	3	01Experiment	71	23.5	24.5	12	1
60	1	1	Experiment	L	4	01Experiment	59.5	23.5	21.5	12	1
76	1	1	Experiment	L	5	01Experiment	31.5	23.5	18	12	1
92	1	1	Experiment	L	6	01Experiment	41	23.5	26.5	12	1
108	1	1	Experiment	L	7	01Experiment	34	23.5	23	12	1
124	1	1	Experiment	L	8	01Experiment	39	23.5	26	12	1
140	1	1	Experiment	L	9	01Experiment	63	23.5	29	12	1
156	1	1	Experiment	L	10	01Experiment	77	23.5	33	12	1
172	1	1	Experiment	L	11	01Experiment	47.5	23.5	39.5	12	1
188	1	1	Experiment	L	12	01Experiment	84	23.5	32.5	12	1
204	1	1	Experiment	L	13	01Experiment	53.5	23.5	34	12	1
220	1	1	Experiment	L	14	01Experiment	55.5	23.5	28.5	12	1
236	1	1	Experiment	L	15	01Experiment	64	23.5	30	12	1
252	1	1	Experiment	L	16	01Experiment	0	23.5	0	12	1
268	1	1	Experiment	L	17	01Experiment	61	23.5	30	12	1
284	1	1	Experiment	L	18	01Experiment	32.5	23.5	11.5	12	1
300	1	1	Experiment	L	19	01Experiment	70.5	23.5	44	12	1
316	1	1	Experiment	L	20	01Experiment	0	23.5	0	12	1
332	1	1	Experiment	L	21	01Experiment	68	23.5	30.5	12	1
348	1	1	Experiment	L	22	01Experiment	5.5	23.5	0.5	12	1
364	1	1	Experiment	L	23	01Experiment	80.5	23.5	39.5	12	1
380	1	1	Experiment	L	24	01Experiment	83	23.5	35.5	12	1
13	1	1	Experiment	M	1	01Experiment	45.5	25.5	19	13	1
29	1	1	Experiment	M	2	01Experiment	64.5	25.5	23.5	13	1
45	1	1	Experiment	M	3	01Experiment	77	25.5	41.5	13	1
61	1	1	Experiment	M	4	01Experiment	43.5	25.5	14	13	1
77	1	1	Experiment	M	5	01Experiment	64.5	25.5	23	13	1
93	1	1	Experiment	M	6	01Experiment	36.5	25.5	20.5	13	1
109	1	1	Experiment	M	7	01Experiment	24.5	25.5	22	13	1
125	1	1	Experiment	M	8	01Experiment	62.5	25.5	35.5	13	1
141	1	1	Experiment	M	9	01Experiment	60	25.5	29	13	1
157	1	1	Experiment	M	10	01Experiment	33	25.5	26	13	1
173	1	1	Experiment	M	11	01Experiment	59	25.5	53.5	13	1
189	1	1	Experiment	M	12	01Experiment	67	25.5	30	13	1
205	1	1	Experiment	M	13	01Experiment	64	25.5	27	13	1
221	1	1	Experiment	M	14	01Experiment	56.5	25.5	25	13	1
237	1	1	Experiment	M	15	01Experiment	56.5	25.5	26	13	1
253	1	1	Experiment	M	16	01Experiment	76	25.5	27	13	1
269	1	1	Experiment	M	17	01Experiment	42	25.5	25.5	13	1
285	1	1	Experiment	M	18	01Experiment	53.5	25.5	27.5	13	1
301	1	1	Experiment	M	19	01Experiment	48.5	25.5	26.5	13	1
317	1	1	Experiment	M	20	01Experiment	64	25.5	31.5	13	1
333	1	1	Experiment	M	21	01Experiment	64	25.5	18.5	13	1
349	1	1	Experiment	M	22	01Experiment	45.5	25.5	31.5	13	1
365	1	1	Experiment	M	23	01Experiment	65	25.5	26	13	1
381	1	1	Experiment	M	24	01Experiment	81	25.5	36.5	13	1
14	1	1	Experiment	N	1	01Experiment	47	27.5	12	14	1
30	1	1	Experiment	N	2	01Experiment	41.5	27.5	17.5	14	1
46	1	1	Experiment	N	3	01Experiment	40	27.5	22.5	14	1
62	1	1	Experiment	N	4	01Experiment	31	27.5	20.5	14	1
78	1	1	Experiment	N	5	01Experiment	69.5	27.5	28	14	1
94	1	1	Experiment	N	6	01Experiment	52.5	27.5	18	14	1
110	1	1	Experiment	N	7	01Experiment	45	27.5	22	14	1
126	1	1	Experiment	N	8	01Experiment	39.5	27.5	24.5	14	1
142	1	1	Experiment	N	9	01Experiment	42.5	27.5	27.5	14	1
158	1	1	Experiment	N	10	01Experiment	31	27.5	27	14	1
174	1	1	Experiment	N	11	01Experiment	61.5	27.5	49.5	14	1
190	1	1	Experiment	N	12	01Experiment	60.5	27.5	22.5	14	1
206	1	1	Experiment	N	13	01Experiment	30.5	27.5	14	14	1
222	1	1	Experiment	N	14	01Experiment	60	27.5	30.5	14	1
238	1	1	Experiment	N	15	01Experiment	50.5	27.5	25.5	14	1
254	1	1	Experiment	N	16	01Experiment	58	27.5	34	14	1
270	1	1	Experiment	N	17	01Experiment	48	27.5	29.5	14	1
286	1	1	Experiment	N	18	01Experiment	40.5	27.5	19	14	1
302	1	1	Experiment	N	19	01Experiment	47.5	27.5	26.5	14	1
318	1	1	Experiment	N	20	01Experiment	35.5	27.5	20.5	14	1
334	1	1	Experiment	N	21	01Experiment	46	27.5	23.5	14	1
350	1	1	Experiment	N	22	01Experiment	42	27.5	23.5	14	1
366	1	1	Experiment	N	23	01Experiment	49.5	27.5	26	14	1
382	1	1	Experiment	N	24	01Experiment	61	27.5	30.5	14	1
15	1	1	Experiment	O	1	01Experiment	55	29.5	25	15	1
31	1	1	Experiment	O	2	01Experiment	50.5	29.5	30	15	1
47	1	1	Experiment	O	3	01Experiment	35	29.5	14.5	15	1
63	1	1	Experiment	O	4	01Experiment	46.5	29.5	29	15	1
79	1	1	Experiment	O	5	01Experiment	38	29.5	14	15	1
95	1	1	Experiment	O	6	01Experiment	52	29.5	35.5	15	1
111	1	1	Experiment	O	7	01Experiment	35	29.5	19.5	15	1
127	1	1	Experiment	O	8	01Experiment	59	29.5	31.5	15	1
143	1	1	Experiment	O	9	01Experiment	43.5	29.5	21	15	1
159	1	1	Experiment	O	10	01Experiment	42.5	29.5	24	15	1
175	1	1	Experiment	O	11	01Experiment	67.5	29.5	27.5	15	1
191	1	1	Experiment	O	12	01Experiment	62.5	29.5	33.5	15	1
207	1	1	Experiment	O	13	01Experiment	73.5	29.5	26.5	15	1
223	1	1	Experiment	O	14	01Experiment	56.5	29.5	15.5	15	1
239	1	1	Experiment	O	15	01Experiment	51.5	29.5	19.5	15	1
255	1	1	Experiment	O	16	01Experiment	51	29.5	22	15	1
271	1	1	Experiment	O	17	01Experiment	60	29.5	43	15	1
287	1	1	Experiment	O	18	01Experiment	58	29.5	26.5	15	1
303	1	1	Experiment	O	19	01Experiment	50	29.5	22	15	1
319	1	1	Experiment	O	20	01Experiment	33.5	29.5	14	15	1
335	1	1	Experiment	O	21	01Experiment	48	29.5	24.5	15	1
351	1	1	Experiment	O	22	01Experiment	81	29.5	23	15	1
367	1	1	Experiment	O	23	01Experiment	61	29.5	29.5	15	1
383	1	1	Experiment	O	24	01Experiment	50.5	29.5	23.5	15	1
16	1	1	Experiment	P	1	01Experiment	99.5	31.5	29	16	1
32	1	1	Experiment	P	2	01Experiment	80	31.5	20	16	1
48	1	1	Experiment	P	3	01Experiment	69	31.5	24.5	16	1
64	1	1	Experiment	P	4	01Experiment	72	31.5	24	16	1
80	1	1	Experiment	P	5	01Experiment	75.5	31.5	25.5	16	1
96	1	1	Experiment	P	6	01Experiment	78	31.5	24.5	16	1
112	1	1	Experiment	P	7	01Experiment	66	31.5	21	16	1
128	1	1	Experiment	P	8	01Experiment	60	31.5	16	16	1
144	1	1	Experiment	P	9	01Experiment	32.5	31.5	1	16	1
160	1	1	Experiment	P	10	01Experiment	69	31.5	23	16	1
176	1	1	Experiment	P	11	01Experiment	69	31.5	20	16	1
192	1	1	Experiment	P	12	01Experiment	55.5	31.5	35.5	16	1
208	1	1	Experiment	P	13	01Experiment	29	31.5	21.5	16	1
224	1	1	Experiment	P	14	01Experiment	70.5	31.5	30	16	1
240	1	1	Experiment	P	15	01Experiment	84.5	31.5	41	16	1
256	1	1	Experiment	P	16	01Experiment	79.5	31.5	24	16	1
272	1	1	Experiment	P	17	01Experiment	79.5	31.5	28.5	16	1
288	1	1	Experiment	P	18	01Experiment	67	31.5	28.5	16	1
304	1	1	Experiment	P	19	01Experiment	71.5	31.5	19.5	16	1
320	1	1	Experiment	P	20	01Experiment	83.5	31.5	35	16	1
336	1	1	Experiment	P	21	01Experiment	86	31.5	46	16	1
352	1	1	Experiment	P	22	01Experiment	55.5	31.5	19	16	1
368	1	1	Experiment	P	23	01Experiment	41.5	31.5	24	16	1
384	1	1	Experiment	P	24	01Experiment	90.5	31.5	21.5	16	1
385	1	2	Experiment	A	1	02Experiment	111	1.5	50	1	2
401	1	2	Experiment	A	2	02Experiment	63.5	1.5	32	1	2
417	1	2	Experiment	A	3	02Experiment	76.5	1.5	37.5	1	2
433	1	2	Experiment	A	4	02Experiment	78	1.5	35.5	1	2
449	1	2	Experiment	A	5	02Experiment	130.5	1.5	69.5	1	2
465	1	2	Experiment	A	6	02Experiment	120	1.5	45	1	2
481	1	2	Experiment	A	7	02Experiment	133.5	1.5	57	1	2
497	1	2	Experiment	A	8	02Experiment	74	1.5	31	1	2
513	1	2	Experiment	A	9	02Experiment	58.5	1.5	25.5	1	2
529	1	2	Experiment	A	10	02Experiment	138.5	1.5	55	1	2
545	1	2	Experiment	A	11	02Experiment	103.5	1.5	48.5	1	2
561	1	2	Experiment	A	12	02Experiment	161	1.5	73.5	1	2
577	1	2	Experiment	A	13	02Experiment	106.5	1.5	49	1	2
593	1	2	Experiment	A	14	02Experiment	99	1.5	52.5	1	2
609	1	2	Experiment	A	15	02Experiment	108.5	1.5	49	1	2
625	1	2	Experiment	A	16	02Experiment	76.5	1.5	54.5	1	2
641	1	2	Experiment	A	17	02Experiment	129	1.5	61	1	2
657	1	2	Experiment	A	18	02Experiment	117	1.5	85.5	1	2
673	1	2	Experiment	A	19	02Experiment	122	1.5	50	1	2
689	1	2	Experiment	A	20	02Experiment	102.5	1.5	44.5	1	2
705	1	2	Experiment	A	21	02Experiment	108	1.5	31.5	1	2
721	1	2	Experiment	A	22	02Experiment	131	1.5	49.5	1	2
737	1	2	Experiment	A	23	02Experiment	87	1.5	46	1	2
753	1	2	Experiment	A	24	02Experiment	39	1.5	65.5	1	2	X
386	1	2	Experiment	B	1	02Experiment	63	3.5	42	2	2
402	1	2	Experiment	B	2	02Experiment	51.5	3.5	31	2	2
418	1	2	Experiment	B	3	02Experiment	63.5	3.5	39.5	2	2
434	1	2	Experiment	B	4	02Experiment	112.5	3.5	45	2	2
450	1	2	Experiment	B	5	02Experiment	85.5	3.5	44	2	2
466	1	2	Experiment	B	6	02Experiment	91.5	3.5	45.5	2	2
482	1	2	Experiment	B	7	02Experiment	93.5	3.5	55	2	2
498	1	2	Experiment	B	8	02Experiment	114	3.5	48	2	2
514	1	2	Experiment	B	9	02Experiment	46.5	3.5	17.5	2	2
530	1	2	Experiment	B	10	02Experiment	84	3.5	48	2	2
546	1	2	Experiment	B	11	02Experiment	113.5	3.5	55	2	2
562	1	2	Experiment	B	12	02Experiment	98	3.5	50	2	2
578	1	2	Experiment	B	13	02Experiment	153	3.5	61	2	2
594	1	2	Experiment	B	14	02Experiment	114.5	3.5	50.5	2	2
610	1	2	Experiment	B	15	02Experiment	94.5	3.5	54	2	2
626	1	2	Experiment	B	16	02Experiment	116	3.5	51.5	2	2
642	1	2	Experiment	B	17	02Experiment	75.5	3.5	40.5	2	2
658	1	2	Experiment	B	18	02Experiment	108	3.5	52	2	2
674	1	2	Experiment	B	19	02Experiment	112	3.5	57.5	2	2
690	1	2	Experiment	B	20	02Experiment	103	3.5	53	2	2
706	1	2	Experiment	B	21	02Experiment	90.5	3.5	58	2	2
722	1	2	Experiment	B	22	02Experiment	122	3.5	50.5	2	2
738	1	2	Experiment	B	23	02Experiment	107.5	3.5	55.5	2	2
754	1	2	Experiment	B	24	02Experiment	42.5	3.5	44.5	2	2	X
387	1	2	Experiment	C	1	02Experiment	0	5.5	32	3	2	X
403	1	2	Experiment	C	2	02Experiment	54	5.5	34.5	3	2	X
419	1	2	Experiment	C	3	02Experiment	60.5	5.5	38	3	2
435	1	2	Experiment	C	4	02Experiment	28.5	5.5	19	3	2
451	1	2	Experiment	C	5	02Experiment	89.5	5.5	75.5	3	2
467	1	2	Experiment	C	6	02Experiment	131	5.5	48	3	2
483	1	2	Experiment	C	7	02Experiment	52	5.5	22.5	3	2
499	1	2	Experiment	C	8	02Experiment	38.5	5.5	27	3	2
515	1	2	Experiment	C	9	02Experiment	62	5.5	52	3	2
531	1	2	Experiment	C	10	02Experiment	84	5.5	43	3	2
547	1	2	Experiment	C	11	02Experiment	87.5	5.5	45.5	3	2
563	1	2	Experiment	C	12	02Experiment	94	5.5	87	3	2
579	1	2	Experiment	C	13	02Experiment	78.5	5.5	46.5	3	2
595	1	2	Experiment	C	14	02Experiment	79	5.5	40	3	2
611	1	2	Experiment	C	15	02Experiment	56.5	5.5	32	3	2
627	1	2	Experiment	C	16	02Experiment	89.5	5.5	47.5	3	2
643	1	2	Experiment	C	17	02Experiment	95.5	5.5	47.5	3	2
659	1	2	Experiment	C	18	02Experiment	88.5	5.5	49	3	2
675	1	2	Experiment	C	19	02Experiment	97	5.5	67	3	2
691	1	2	Experiment	C	20	02Experiment	82	5.5	47.5	3	2
707	1	2	Experiment	C	21	02Experiment	95.5	5.5	43	3	2
723	1	2	Experiment	C	22	02Experiment	108.5	5.5	52	3	2
739	1	2	Experiment	C	23	02Experiment	30	5.5	34	3	2
755	1	2	Experiment	C	24	02Experiment	0	5.5	42	3	2	X
388	1	2	Experiment	D	1	02Experiment	0	7.5	38.5	4	2	X
404	1	2	Experiment	D	2	02Experiment	0	7.5	39	4	2	X
420	1	2	Experiment	D	3	02Experiment	69	7.5	39.5	4	2
436	1	2	Experiment	D	4	02Experiment	63.5	7.5	35	4	2
452	1	2	Experiment	D	5	02Experiment	54.5	7.5	31	4	2
468	1	2	Experiment	D	6	02Experiment	45.5	7.5	24	4	2
484	1	2	Experiment	D	7	02Experiment	88.5	7.5	46	4	2
500	1	2	Experiment	D	8	02Experiment	75	7.5	37.5	4	2
516	1	2	Experiment	D	9	02Experiment	30	7.5	14.5	4	2
532	1	2	Experiment	D	10	02Experiment	82	7.5	45	4	2
548	1	2	Experiment	D	11	02Experiment	73.5	7.5	49	4	2
564	1	2	Experiment	D	12	02Experiment	88.5	7.5	52	4	2
580	1	2	Experiment	D	13	02Experiment	61.5	7.5	38.5	4	2
596	1	2	Experiment	D	14	02Experiment	72	7.5	47	4	2
612	1	2	Experiment	D	15	02Experiment	79.5	7.5	45	4	2
628	1	2	Experiment	D	16	02Experiment	59	7.5	46.5	4	2
644	1	2	Experiment	D	17	02Experiment	78	7.5	45.5	4	2
660	1	2	Experiment	D	18	02Experiment	54	7.5	36.5	4	2
676	1	2	Experiment	D	19	02Experiment	95.5	7.5	45	4	2
692	1	2	Experiment	D	20	02Experiment	55	7.5	44.5	4	2
708	1	2	Experiment	D	21	02Experiment	29.5	7.5	35.5	4	2
724	1	2	Experiment	D	22	02Experiment	73	7.5	70	4	2
740	1	2	Experiment	D	23	02Experiment	78.5	7.5	52.5	4	2
756	1	2	Experiment	D	24	02Experiment	58	7.5	44.5	4	2	X
389	1	2	Experiment	E	1	02Experiment	0	9.5	33.5	5	2	X
405	1	2	Experiment	E	2	02Experiment	0	9.5	32.5	5	2	X
421	1	2	Experiment	E	3	02Experiment	98	9.5	54.5	5	2
437	1	2	Experiment	E	4	02Experiment	53.5	9.5	34	5	2
453	1	2	Experiment	E	5	02Experiment	45.5	9.5	49	5	2
469	1	2	Experiment	E	6	02Experiment	74	9.5	53.5	5	2
485	1	2	Experiment	E	7	02Experiment	49.5	9.5	35	5	2
501	1	2	Experiment	E	8	02Experiment	47.5	9.5	23	5	2
517	1	2	Experiment	E	9	02Experiment	32	9.5	25	5	2
533	1	2	Experiment	E	10	02Experiment	69	9.5	46	5	2
549	1	2	Experiment	E	11	02Experiment	74	9.5	61.5	5	2
565	1	2	Experiment	E	12	02Experiment	71.5	9.5	48	5	2
581	1	2	Experiment	E	13	02Experiment	70	9.5	45.5	5	2
597	1	2	Experiment	E	14	02Experiment	68.5	9.5	45	5	2
613	1	2	Experiment	E	15	02Experiment	35	9.5	23.5	5	2
629	1	2	Experiment	E	16	02Experiment	103	9.5	47.5	5	2
645	1	2	Experiment	E	17	02Experiment	74.5	9.5	50.5	5	2
661	1	2	Experiment	E	18	02Experiment	56.5	9.5	42	5	2
677	1	2	Experiment	E	19	02Experiment	40	9.5	39.5	5	2
693	1	2	Experiment	E	20	02Experiment	48.5	9.5	41	5	2
709	1	2	Experiment	E	21	02Experiment	62.5	9.5	36.5	5	2
725	1	2	Experiment	E	22	02Experiment	54	9.5	43.5	5	2
741	1	2	Experiment	E	23	02Experiment	113	9.5	61.5	5	2
757	1	2	Experiment	E	24	02Experiment	0	9.5	62	5	2	X
390	1	2	Experiment	F	1	02Experiment	0	11.5	33.5	6	2	X
406	1	2	Experiment	F	2	02Experiment	0	11.5	31.5	6	2	X
422	1	2	Experiment	F	3	02Experiment	58	11.5	29.5	6	2
438	1	2	Experiment	F	4	02Experiment	45.5	11.5	31.5	6	2
454	1	2	Experiment	F	5	02Experiment	46	11.5	35.5	6	2
470	1	2	Experiment	F	6	02Experiment	59	11.5	32.5	6	2
486	1	2	Experiment	F	7	02Experiment	57.5	11.5	34.5	6	2
502	1	2	Experiment	F	8	02Experiment	26	11.5	35	6	2
518	1	2	Experiment	F	9	02Experiment	0	11.5	0	6	2
534	1	2	Experiment	F	10	02Experiment	15.5	11.5	10.5	6	2
550	1	2	Experiment	F	11	02Experiment	65	11.5	46.5	6	2
566	1	2	Experiment	F	12	02Experiment	34	11.5	40.5	6	2
582	1	2	Experiment	F	13	02Experiment	74.5	11.5	78	6	2
598	1	2	Experiment	F	14	02Experiment	73	11.5	40.5	6	2
614	1	2	Experiment	F	15	02Experiment	58	11.5	37	6	2
630	1	2	Experiment	F	16	02Experiment	48	11.5	38.5	6	2
646	1	2	Experiment	F	17	02Experiment	46	11.5	30.5	6	2
662	1	2	Experiment	F	18	02Experiment	51.5	11.5	37	6	2
678	1	2	Experiment	F	19	02Experiment	59.5	11.5	43.5	6	2
694	1	2	Experiment	F	20	02Experiment	41.5	11.5	39.5	6	2
710	1	2	Experiment	F	21	02Experiment	38.5	11.5	46.5	6	2
726	1	2	Experiment	F	22	02Experiment	64	11.5	61	6	2
742	1	2	Experiment	F	23	02Experiment	72.5	11.5	48	6	2
758	1	2	Experiment	F	24	02Experiment	58.5	11.5	37.5	6	2
391	1	2	Experiment	G	1	02Experiment	114.5	13.5	62	7	2
407	1	2	Experiment	G	2	02Experiment	32.5	13.5	27	7	2
423	1	2	Experiment	G	3	02Experiment	49.5	13.5	26	7	2
439	1	2	Experiment	G	4	02Experiment	44	13.5	29.5	7	2
455	1	2	Experiment	G	5	02Experiment	33.5	13.5	33.5	7	2
471	1	2	Experiment	G	6	02Experiment	28	13.5	30	7	2
487	1	2	Experiment	G	7	02Experiment	66	13.5	37.5	7	2
503	1	2	Experiment	G	8	02Experiment	80.5	13.5	37	7	2
519	1	2	Experiment	G	9	02Experiment	44	13.5	28.5	7	2
535	1	2	Experiment	G	10	02Experiment	55	13.5	32.5	7	2
551	1	2	Experiment	G	11	02Experiment	16.5	13.5	16	7	2
567	1	2	Experiment	G	12	02Experiment	55	13.5	38	7	2
583	1	2	Experiment	G	13	02Experiment	45	13.5	36	7	2
599	1	2	Experiment	G	14	02Experiment	55	13.5	39	7	2
615	1	2	Experiment	G	15	02Experiment	64	13.5	38	7	2
631	1	2	Experiment	G	16	02Experiment	64	13.5	35.5	7	2
647	1	2	Experiment	G	17	02Experiment	53	13.5	35	7	2
663	1	2	Experiment	G	18	02Experiment	62.5	13.5	40	7	2
679	1	2	Experiment	G	19	02Experiment	58	13.5	40.5	7	2
695	1	2	Experiment	G	20	02Experiment	45	13.5	39.5	7	2
711	1	2	Experiment	G	21	02Experiment	44.5	13.5	37	7	2
727	1	2	Experiment	G	22	02Experiment	44.5	13.5	38	7	2
743	1	2	Experiment	G	23	02Experiment	79.5	13.5	64	7	2
759	1	2	Experiment	G	24	02Experiment	65.5	13.5	27	7	2
392	1	2	Experiment	H	1	02Experiment	80	15.5	33.5	8	2
408	1	2	Experiment	H	2	02Experiment	37.5	15.5	29.5	8	2
424	1	2	Experiment	H	3	02Experiment	33.5	15.5	27.5	8	2
440	1	2	Experiment	H	4	02Experiment	23	15.5	31	8	2
456	1	2	Experiment	H	5	02Experiment	20.5	15.5	30.5	8	2
472	1	2	Experiment	H	6	02Experiment	33	15.5	31	8	2
488	1	2	Experiment	H	7	02Experiment	31.5	15.5	34	8	2
504	1	2	Experiment	H	8	02Experiment	36.5	15.5	38.5	8	2
520	1	2	Experiment	H	9	02Experiment	31	15.5	36	8	2
536	1	2	Experiment	H	10	02Experiment	41	15.5	38	8	2
552	1	2	Experiment	H	11	02Experiment	47	15.5	40	8	2
568	1	2	Experiment	H	12	02Experiment	37.5	15.5	37	8	2
584	1	2	Experiment	H	13	02Experiment	52.5	15.5	40	8	2
600	1	2	Experiment	H	14	02Experiment	48.5	15.5	36.5	8	2
616	1	2	Experiment	H	15	02Experiment	34.5	15.5	22.5	8	2
632	1	2	Experiment	H	16	02Experiment	45.5	15.5	36	8	2
648	1	2	Experiment	H	17	02Experiment	52	15.5	38	8	2
664	1	2	Experiment	H	18	02Experiment	47.5	15.5	31	8	2
680	1	2	Experiment	H	19	02Experiment	54	15.5	36.5	8	2
696	1	2	Experiment	H	20	02Experiment	48	15.5	39.5	8	2
712	1	2	Experiment	H	21	02Experiment	55	15.5	57.5	8	2
728	1	2	Experiment	H	22	02Experiment	41	15.5	32	8	2
744	1	2	Experiment	H	23	02Experiment	52	15.5	26.5	8	2
760	1	2	Experiment	H	24	02Experiment	38	15.5	22	8	2
393	1	2	Experiment	I	1	02Experiment	49	17.5	25	9	2
409	1	2	Experiment	I	2	02Experiment	42.5	17.5	25.5	9	2
425	1	2	Experiment	I	3	02Experiment	15	17.5	21	9	2
441	1	2	Experiment	I	4	02Experiment	19.5	17.5	27.5	9	2
457	1	2	Experiment	I	5	02Experiment	19.5	17.5	15.5	9	2
473	1	2	Experiment	I	6	02Experiment	13	17.5	27	9	2
489	1	2	Experiment	I	7	02Experiment	37.5	17.5	37.5	9	2
505	1	2	Experiment	I	8	02Experiment	21.5	17.5	33.5	9	2
521	1	2	Experiment	I	9	02Experiment	50.5	17.5	44	9	2
537	1	2	Experiment	I	10	02Experiment	68.5	17.5	37	9	2
553	1	2	Experiment	I	11	02Experiment	26	17.5	35	9	2
569	1	2	Experiment	I	12	02Experiment	44.5	17.5	30.5	9	2
585	1	2	Experiment	I	13	02Experiment	68	17.5	37.5	9	2
601	1	2	Experiment	I	14	02Experiment	20.5	17.5	31.5	9	2
617	1	2	Experiment	I	15	02Experiment	11.5	17.5	17.5	9	2
633	1	2	Experiment	I	16	02Experiment	43	17.5	37	9	2
649	1	2	Experiment	I	17	02Experiment	54	17.5	30.5	9	2
665	1	2	Experiment	I	18	02Experiment	49	17.5	27	9	2
681	1	2	Experiment	I	19	02Experiment	54	17.5	52.5	9	2
697	1	2	Experiment	I	20	02Experiment	29	17.5	27	9	2
713	1	2	Experiment	I	21	02Experiment	30.5	17.5	32	9	2
729	1	2	Experiment	I	22	02Experiment	51	17.5	23	9	2
745	1	2	Experiment	I	23	02Experiment	18.5	17.5	12	9	2
761	1	2	Experiment	I	24	02Experiment	53	17.5	24	9	2
394	1	2	Experiment	J	1	02Experiment	35	19.5	26.5	10	2
410	1	2	Experiment	J	2	02Experiment	30	19.5	26.5	10	2
426	1	2	Experiment	J	3	02Experiment	39	19.5	34	10	2
442	1	2	Experiment	J	4	02Experiment	12.5	19.5	24	10	2
458	1	2	Experiment	J	5	02Experiment	16	19.5	25.5	10	2
474	1	2	Experiment	J	6	02Experiment	35.5	19.5	26	10	2
490	1	2	Experiment	J	7	02Experiment	40.5	19.5	41	10	2
506	1	2	Experiment	J	8	02Experiment	14	19.5	33	10	2
522	1	2	Experiment	J	9	02Experiment	18	19.5	33	10	2
538	1	2	Experiment	J	10	02Experiment	33	19.5	25	10	2
554	1	2	Experiment	J	11	02Experiment	50	19.5	28.5	10	2
570	1	2	Experiment	J	12	02Experiment	41	19.5	31.5	10	2
586	1	2	Experiment	J	13	02Experiment	33.5	19.5	29	10	2
602	1	2	Experiment	J	14	02Experiment	31	19.5	35.5	10	2
618	1	2	Experiment	J	15	02Experiment	47	19.5	31.5	10	2
634	1	2	Experiment	J	16	02Experiment	33.5	19.5	28.5	10	2
650	1	2	Experiment	J	17	02Experiment	49	19.5	33	10	2
666	1	2	Experiment	J	18	02Experiment	49	19.5	34.5	10	2
682	1	2	Experiment	J	19	02Experiment	32	19.5	49	10	2
698	1	2	Experiment	J	20	02Experiment	28	19.5	25.5	10	2
714	1	2	Experiment	J	21	02Experiment	31.5	19.5	38.5	10	2
730	1	2	Experiment	J	22	02Experiment	35.5	19.5	23	10	2
746	1	2	Experiment	J	23	02Experiment	41.5	19.5	28	10	2
762	1	2	Experiment	J	24	02Experiment	40.5	19.5	16	10	2
395	1	2	Experiment	K	1	02Experiment	38	21.5	24.5	11	2
411	1	2	Experiment	K	2	02Experiment	23	21.5	19.5	11	2
427	1	2	Experiment	K	3	02Experiment	15	21.5	19	11	2
443	1	2	Experiment	K	4	02Experiment	15	21.5	20.5	11	2
459	1	2	Experiment	K	5	02Experiment	18	21.5	20	11	2
475	1	2	Experiment	K	6	02Experiment	18.5	21.5	31.5	11	2
491	1	2	Experiment	K	7	02Experiment	18	21.5	22.5	11	2
507	1	2	Experiment	K	8	02Experiment	16.5	21.5	31.5	11	2
523	1	2	Experiment	K	9	02Experiment	21	21.5	34	11	2
539	1	2	Experiment	K	10	02Experiment	24.5	21.5	36	11	2
555	1	2	Experiment	K	11	02Experiment	32.5	21.5	34	11	2
571	1	2	Experiment	K	12	02Experiment	26	21.5	37.5	11	2
587	1	2	Experiment	K	13	02Experiment	34.5	21.5	21.5	11	2
603	1	2	Experiment	K	14	02Experiment	23.5	21.5	28	11	2
619	1	2	Experiment	K	15	02Experiment	1.5	21.5	1	11	2
635	1	2	Experiment	K	16	02Experiment	51	21.5	32	11	2
651	1	2	Experiment	K	17	02Experiment	16	21.5	17.5	11	2
667	1	2	Experiment	K	18	02Experiment	32.5	21.5	32	11	2
683	1	2	Experiment	K	19	02Experiment	34	21.5	41.5	11	2
699	1	2	Experiment	K	20	02Experiment	34.5	21.5	37.5	11	2
715	1	2	Experiment	K	21	02Experiment	21.5	21.5	19	11	2
731	1	2	Experiment	K	22	02Experiment	51	21.5	31	11	2
747	1	2	Experiment	K	23	02Experiment	35	21.5	21.5	11	2
763	1	2	Experiment	K	24	02Experiment	46.5	21.5	37.5	11	2
396	1	2	Experiment	L	1	02Experiment	34	23.5	26.5	12	2
412	1	2	Experiment	L	2	02Experiment	25.5	23.5	24	12	2
428	1	2	Experiment	L	3	02Experiment	15.5	23.5	24.5	12	2
444	1	2	Experiment	L	4	02Experiment	19.5	23.5	21.5	12	2
460	1	2	Experiment	L	5	02Experiment	15.5	23.5	18	12	2
476	1	2	Experiment	L	6	02Experiment	16	23.5	26.5	12	2
492	1	2	Experiment	L	7	02Experiment	15	23.5	23	12	2
508	1	2	Experiment	L	8	02Experiment	12.5	23.5	26	12	2
524	1	2	Experiment	L	9	02Experiment	35	23.5	29	12	2
540	1	2	Experiment	L	10	02Experiment	48	23.5	33	12	2
556	1	2	Experiment	L	11	02Experiment	32	23.5	39.5	12	2
572	1	2	Experiment	L	12	02Experiment	27	23.5	32.5	12	2
588	1	2	Experiment	L	13	02Experiment	25.5	23.5	34	12	2
604	1	2	Experiment	L	14	02Experiment	39	23.5	28.5	12	2
620	1	2	Experiment	L	15	02Experiment	30.5	23.5	30	12	2
636	1	2	Experiment	L	16	02Experiment	0	23.5	0	12	2
652	1	2	Experiment	L	17	02Experiment	24	23.5	30	12	2
668	1	2	Experiment	L	18	02Experiment	22	23.5	11.5	12	2
684	1	2	Experiment	L	19	02Experiment	48	23.5	44	12	2
700	1	2	Experiment	L	20	02Experiment	0	23.5	0	12	2
716	1	2	Experiment	L	21	02Experiment	21	23.5	30.5	12	2
732	1	2	Experiment	L	22	02Experiment	0.5	23.5	0.5	12	2
748	1	2	Experiment	L	23	02Experiment	57.5	23.5	39.5	12	2
764	1	2	Experiment	L	24	02Experiment	70	23.5	35.5	12	2
397	1	2	Experiment	M	1	02Experiment	20	25.5	19	13	2
413	1	2	Experiment	M	2	02Experiment	29	25.5	23.5	13	2
429	1	2	Experiment	M	3	02Experiment	45.5	25.5	41.5	13	2
445	1	2	Experiment	M	4	02Experiment	12.5	25.5	14	13	2
461	1	2	Experiment	M	5	02Experiment	19.5	25.5	23	13	2
477	1	2	Experiment	M	6	02Experiment	12	25.5	20.5	13	2
493	1	2	Experiment	M	7	02Experiment	11	25.5	22	13	2
509	1	2	Experiment	M	8	02Experiment	31.5	25.5	35.5	13	2
525	1	2	Experiment	M	9	02Experiment	15.5	25.5	29	13	2
541	1	2	Experiment	M	10	02Experiment	10.5	25.5	26	13	2
557	1	2	Experiment	M	11	02Experiment	48.5	25.5	53.5	13	2
573	1	2	Experiment	M	12	02Experiment	32	25.5	30	13	2
589	1	2	Experiment	M	13	02Experiment	21.5	25.5	27	13	2
605	1	2	Experiment	M	14	02Experiment	18.5	25.5	25	13	2
621	1	2	Experiment	M	15	02Experiment	18.5	25.5	26	13	2
637	1	2	Experiment	M	16	02Experiment	20	25.5	27	13	2
653	1	2	Experiment	M	17	02Experiment	18	25.5	25.5	13	2
669	1	2	Experiment	M	18	02Experiment	24	25.5	27.5	13	2
685	1	2	Experiment	M	19	02Experiment	26	25.5	26.5	13	2
701	1	2	Experiment	M	20	02Experiment	19.5	25.5	31.5	13	2
717	1	2	Experiment	M	21	02Experiment	29.5	25.5	18.5	13	2
733	1	2	Experiment	M	22	02Experiment	43	25.5	31.5	13	2
749	1	2	Experiment	M	23	02Experiment	21.5	25.5	26	13	2
765	1	2	Experiment	M	24	02Experiment	50.5	25.5	36.5	13	2
398	1	2	Experiment	N	1	02Experiment	40	27.5	12	14	2
414	1	2	Experiment	N	2	02Experiment	12.5	27.5	17.5	14	2
430	1	2	Experiment	N	3	02Experiment	12.5	27.5	22.5	14	2
446	1	2	Experiment	N	4	02Experiment	13.5	27.5	20.5	14	2
462	1	2	Experiment	N	5	02Experiment	19	27.5	28	14	2
478	1	2	Experiment	N	6	02Experiment	14	27.5	18	14	2
494	1	2	Experiment	N	7	02Experiment	11.5	27.5	22	14	2
510	1	2	Experiment	N	8	02Experiment	12	27.5	24.5	14	2
526	1	2	Experiment	N	9	02Experiment	28	27.5	27.5	14	2
542	1	2	Experiment	N	10	02Experiment	20	27.5	27	14	2
558	1	2	Experiment	N	11	02Experiment	32.5	27.5	49.5	14	2
574	1	2	Experiment	N	12	02Experiment	18	27.5	22.5	14	2
590	1	2	Experiment	N	13	02Experiment	16.5	27.5	14	14	2
606	1	2	Experiment	N	14	02Experiment	30.5	27.5	30.5	14	2
622	1	2	Experiment	N	15	02Experiment	16.5	27.5	25.5	14	2
638	1	2	Experiment	N	16	02Experiment	21.5	27.5	34	14	2
654	1	2	Experiment	N	17	02Experiment	17	27.5	29.5	14	2
670	1	2	Experiment	N	18	02Experiment	17.5	27.5	19	14	2
686	1	2	Experiment	N	19	02Experiment	27	27.5	26.5	14	2
702	1	2	Experiment	N	20	02Experiment	18.5	27.5	20.5	14	2
718	1	2	Experiment	N	21	02Experiment	16.5	27.5	23.5	14	2
734	1	2	Experiment	N	22	02Experiment	16.5	27.5	23.5	14	2
750	1	2	Experiment	N	23	02Experiment	20.5	27.5	26	14	2
766	1	2	Experiment	N	24	02Experiment	42	27.5	30.5	14	2
399	1	2	Experiment	O	1	02Experiment	32.5	29.5	25	15	2
415	1	2	Experiment	O	2	02Experiment	30.5	29.5	30	15	2
431	1	2	Experiment	O	3	02Experiment	10.5	29.5	14.5	15	2
447	1	2	Experiment	O	4	02Experiment	24.5	29.5	29	15	2
463	1	2	Experiment	O	5	02Experiment	13.5	29.5	14	15	2
479	1	2	Experiment	O	6	02Experiment	23.5	29.5	35.5	15	2
495	1	2	Experiment	O	7	02Experiment	23	29.5	19.5	15	2
511	1	2	Experiment	O	8	02Experiment	37.5	29.5	31.5	15	2
527	1	2	Experiment	O	9	02Experiment	20	29.5	21	15	2
543	1	2	Experiment	O	10	02Experiment	12	29.5	24	15	2
559	1	2	Experiment	O	11	02Experiment	27.5	29.5	27.5	15	2
575	1	2	Experiment	O	12	02Experiment	34	29.5	33.5	15	2
591	1	2	Experiment	O	13	02Experiment	30	29.5	26.5	15	2
607	1	2	Experiment	O	14	02Experiment	11.5	29.5	15.5	15	2
623	1	2	Experiment	O	15	02Experiment	18	29.5	19.5	15	2
639	1	2	Experiment	O	16	02Experiment	16.5	29.5	22	15	2
655	1	2	Experiment	O	17	02Experiment	45.5	29.5	43	15	2
671	1	2	Experiment	O	18	02Experiment	39	29.5	26.5	15	2
687	1	2	Experiment	O	19	02Experiment	24.5	29.5	22	15	2
703	1	2	Experiment	O	20	02Experiment	13	29.5	14	15	2
719	1	2	Experiment	O	21	02Experiment	18	29.5	24.5	15	2
735	1	2	Experiment	O	22	02Experiment	18	29.5	23	15	2
751	1	2	Experiment	O	23	02Experiment	29	29.5	29.5	15	2
767	1	2	Experiment	O	24	02Experiment	40.5	29.5	23.5	15	2
400	1	2	Experiment	P	1	02Experiment	45.5	31.5	29	16	2
416	1	2	Experiment	P	2	02Experiment	37	31.5	20	16	2
432	1	2	Experiment	P	3	02Experiment	33.5	31.5	24.5	16	2
448	1	2	Experiment	P	4	02Experiment	33.5	31.5	24	16	2
464	1	2	Experiment	P	5	02Experiment	39.5	31.5	25.5	16	2
480	1	2	Experiment	P	6	02Experiment	33.5	31.5	24.5	16	2
496	1	2	Experiment	P	7	02Experiment	42.5	31.5	21	16	2
512	1	2	Experiment	P	8	02Experiment	27.5	31.5	16	16	2
528	1	2	Experiment	P	9	02Experiment	7	31.5	1	16	2
544	1	2	Experiment	P	10	02Experiment	47.5	31.5	23	16	2
560	1	2	Experiment	P	11	02Experiment	36.5	31.5	20	16	2
576	1	2	Experiment	P	12	02Experiment	57	31.5	35.5	16	2
592	1	2	Experiment	P	13	02Experiment	14	31.5	21.5	16	2
608	1	2	Experiment	P	14	02Experiment	39.5	31.5	30	16	2
624	1	2	Experiment	P	15	02Experiment	43.5	31.5	41	16	2
640	1	2	Experiment	P	16	02Experiment	62.5	31.5	24	16	2
656	1	2	Experiment	P	17	02Experiment	66.5	31.5	28.5	16	2
672	1	2	Experiment	P	18	02Experiment	46	31.5	28.5	16	2
688	1	2	Experiment	P	19	02Experiment	63	31.5	19.5	16	2
704	1	2	Experiment	P	20	02Experiment	62	31.5	35	16	2
720	1	2	Experiment	P	21	02Experiment	64	31.5	46	16	2
736	1	2	Experiment	P	22	02Experiment	26.5	31.5	19	16	2
752	1	2	Experiment	P	23	02Experiment	22.5	31.5	24	16	2
768	1	2	Experiment	P	24	02Experiment	63	31.5	21.5	16	2
769	1	3	Experiment	A	1	03Experiment	77.5	1.5	50	1	3
785	1	3	Experiment	A	2	03Experiment	58	1.5	32	1	3
801	1	3	Experiment	A	3	03Experiment	69	1.5	37.5	1	3
817	1	3	Experiment	A	4	03Experiment	63	1.5	35.5	1	3
833	1	3	Experiment	A	5	03Experiment	116	1.5	69.5	1	3
849	1	3	Experiment	A	6	03Experiment	95.5	1.5	45	1	3
865	1	3	Experiment	A	7	03Experiment	119	1.5	57	1	3
881	1	3	Experiment	A	8	03Experiment	54.5	1.5	31	1	3
897	1	3	Experiment	A	9	03Experiment	56	1.5	25.5	1	3
913	1	3	Experiment	A	10	03Experiment	137	1.5	55	1	3
929	1	3	Experiment	A	11	03Experiment	86.5	1.5	48.5	1	3
945	1	3	Experiment	A	12	03Experiment	149.5	1.5	73.5	1	3
961	1	3	Experiment	A	13	03Experiment	86.5	1.5	49	1	3
977	1	3	Experiment	A	14	03Experiment	82.5	1.5	52.5	1	3
993	1	3	Experiment	A	15	03Experiment	85	1.5	49	1	3
1009	1	3	Experiment	A	16	03Experiment	72.5	1.5	54.5	1	3
1025	1	3	Experiment	A	17	03Experiment	105.5	1.5	61	1	3
1041	1	3	Experiment	A	18	03Experiment	107	1.5	85.5	1	3
1057	1	3	Experiment	A	19	03Experiment	105	1.5	50	1	3
1073	1	3	Experiment	A	20	03Experiment	80.5	1.5	44.5	1	3
1089	1	3	Experiment	A	21	03Experiment	82.5	1.5	31.5	1	3
1105	1	3	Experiment	A	22	03Experiment	110	1.5	49.5	1	3
1121	1	3	Experiment	A	23	03Experiment	81	1.5	46	1	3
1137	1	3	Experiment	A	24	03Experiment	33	1.5	65.5	1	3	X
770	1	3	Experiment	B	1	03Experiment	0	3.5	42	2	3	X
786	1	3	Experiment	B	2	03Experiment	0	3.5	31	2	3	X
802	1	3	Experiment	B	3	03Experiment	59	3.5	39.5	2	3
818	1	3	Experiment	B	4	03Experiment	83	3.5	45	2	3
834	1	3	Experiment	B	5	03Experiment	69.5	3.5	44	2	3
850	1	3	Experiment	B	6	03Experiment	74	3.5	45.5	2	3
866	1	3	Experiment	B	7	03Experiment	80.5	3.5	55	2	3
882	1	3	Experiment	B	8	03Experiment	93	3.5	48	2	3
898	1	3	Experiment	B	9	03Experiment	41.5	3.5	17.5	2	3
914	1	3	Experiment	B	10	03Experiment	74	3.5	48	2	3
930	1	3	Experiment	B	11	03Experiment	92.5	3.5	55	2	3
946	1	3	Experiment	B	12	03Experiment	92.5	3.5	50	2	3
962	1	3	Experiment	B	13	03Experiment	149	3.5	61	2	3
978	1	3	Experiment	B	14	03Experiment	93	3.5	50.5	2	3
994	1	3	Experiment	B	15	03Experiment	88.5	3.5	54	2	3
1010	1	3	Experiment	B	16	03Experiment	98.5	3.5	51.5	2	3
1026	1	3	Experiment	B	17	03Experiment	77.5	3.5	40.5	2	3
1042	1	3	Experiment	B	18	03Experiment	93.5	3.5	52	2	3
1058	1	3	Experiment	B	19	03Experiment	98.5	3.5	57.5	2	3
1074	1	3	Experiment	B	20	03Experiment	98.5	3.5	53	2	3
1090	1	3	Experiment	B	21	03Experiment	87	3.5	58	2	3
1106	1	3	Experiment	B	22	03Experiment	101	3.5	50.5	2	3
1122	1	3	Experiment	B	23	03Experiment	97	3.5	55.5	2	3
1138	1	3	Experiment	B	24	03Experiment	41	3.5	44.5	2	3	X
771	1	3	Experiment	C	1	03Experiment	0	5.5	32	3	3	X
787	1	3	Experiment	C	2	03Experiment	0	5.5	34.5	3	3	X
803	1	3	Experiment	C	3	03Experiment	45.5	5.5	38	3	3
819	1	3	Experiment	C	4	03Experiment	23	5.5	19	3	3
835	1	3	Experiment	C	5	03Experiment	81	5.5	75.5	3	3
851	1	3	Experiment	C	6	03Experiment	126.5	5.5	48	3	3
867	1	3	Experiment	C	7	03Experiment	39	5.5	22.5	3	3
883	1	3	Experiment	C	8	03Experiment	43	5.5	27	3	3
899	1	3	Experiment	C	9	03Experiment	63	5.5	52	3	3
915	1	3	Experiment	C	10	03Experiment	79.5	5.5	43	3	3
931	1	3	Experiment	C	11	03Experiment	103.5	5.5	45.5	3	3
947	1	3	Experiment	C	12	03Experiment	106.5	5.5	87	3	3
963	1	3	Experiment	C	13	03Experiment	87	5.5	46.5	3	3
979	1	3	Experiment	C	14	03Experiment	73.5	5.5	40	3	3
995	1	3	Experiment	C	15	03Experiment	45.5	5.5	32	3	3
1011	1	3	Experiment	C	16	03Experiment	79	5.5	47.5	3	3
1027	1	3	Experiment	C	17	03Experiment	80	5.5	47.5	3	3
1043	1	3	Experiment	C	18	03Experiment	77.5	5.5	49	3	3
1059	1	3	Experiment	C	19	03Experiment	112	5.5	67	3	3
1075	1	3	Experiment	C	20	03Experiment	73.5	5.5	47.5	3	3
1091	1	3	Experiment	C	21	03Experiment	80.5	5.5	43	3	3
1107	1	3	Experiment	C	22	03Experiment	92	5.5	52	3	3
1123	1	3	Experiment	C	23	03Experiment	37.5	5.5	34	3	3
1139	1	3	Experiment	C	24	03Experiment	0	5.5	42	3	3	X
772	1	3	Experiment	D	1	03Experiment	66	7.5	38.5	4	3
788	1	3	Experiment	D	2	03Experiment	50.5	7.5	39	4	3
804	1	3	Experiment	D	3	03Experiment	62.5	7.5	39.5	4	3
820	1	3	Experiment	D	4	03Experiment	68	7.5	35	4	3
836	1	3	Experiment	D	5	03Experiment	54	7.5	31	4	3
852	1	3	Experiment	D	6	03Experiment	48	7.5	24	4	3
868	1	3	Experiment	D	7	03Experiment	85	7.5	46	4	3
884	1	3	Experiment	D	8	03Experiment	83	7.5	37.5	4	3
900	1	3	Experiment	D	9	03Experiment	29.5	7.5	14.5	4	3
916	1	3	Experiment	D	10	03Experiment	81.5	7.5	45	4	3
932	1	3	Experiment	D	11	03Experiment	73.5	7.5	49	4	3
948	1	3	Experiment	D	12	03Experiment	100	7.5	52	4	3
964	1	3	Experiment	D	13	03Experiment	58.5	7.5	38.5	4	3
980	1	3	Experiment	D	14	03Experiment	67	7.5	47	4	3
996	1	3	Experiment	D	15	03Experiment	62.5	7.5	45	4	3
1012	1	3	Experiment	D	16	03Experiment	57.5	7.5	46.5	4	3
1028	1	3	Experiment	D	17	03Experiment	69	7.5	45.5	4	3
1044	1	3	Experiment	D	18	03Experiment	58.5	7.5	36.5	4	3
1060	1	3	Experiment	D	19	03Experiment	71.5	7.5	45	4	3
1076	1	3	Experiment	D	20	03Experiment	57	7.5	44.5	4	3
1092	1	3	Experiment	D	21	03Experiment	25.5	7.5	35.5	4	3
1108	1	3	Experiment	D	22	03Experiment	72	7.5	70	4	3
1124	1	3	Experiment	D	23	03Experiment	78	7.5	52.5	4	3
1140	1	3	Experiment	D	24	03Experiment	59	7.5	44.5	4	3
773	1	3	Experiment	E	1	03Experiment	61	9.5	33.5	5	3
789	1	3	Experiment	E	2	03Experiment	52.5	9.5	32.5	5	3
805	1	3	Experiment	E	3	03Experiment	125.5	9.5	54.5	5	3
821	1	3	Experiment	E	4	03Experiment	78.5	9.5	34	5	3
837	1	3	Experiment	E	5	03Experiment	52	9.5	49	5	3
853	1	3	Experiment	E	6	03Experiment	81	9.5	53.5	5	3
869	1	3	Experiment	E	7	03Experiment	59.5	9.5	35	5	3
885	1	3	Experiment	E	8	03Experiment	50	9.5	23	5	3
901	1	3	Experiment	E	9	03Experiment	33	9.5	25	5	3
917	1	3	Experiment	E	10	03Experiment	83	9.5	46	5	3
933	1	3	Experiment	E	11	03Experiment	81	9.5	61.5	5	3
949	1	3	Experiment	E	12	03Experiment	118	9.5	48	5	3
965	1	3	Experiment	E	13	03Experiment	83	9.5	45.5	5	3
981	1	3	Experiment	E	14	03Experiment	58	9.5	45	5	3
997	1	3	Experiment	E	15	03Experiment	30.5	9.5	23.5	5	3
1013	1	3	Experiment	E	16	03Experiment	92.5	9.5	47.5	5	3
1029	1	3	Experiment	E	17	03Experiment	75.5	9.5	50.5	5	3
1045	1	3	Experiment	E	18	03Experiment	66.5	9.5	42	5	3
1061	1	3	Experiment	E	19	03Experiment	57	9.5	39.5	5	3
1077	1	3	Experiment	E	20	03Experiment	48.5	9.5	41	5	3
1093	1	3	Experiment	E	21	03Experiment	54.5	9.5	36.5	5	3
1109	1	3	Experiment	E	22	03Experiment	48.5	9.5	43.5	5	3
1125	1	3	Experiment	E	23	03Experiment	105	9.5	61.5	5	3
1141	1	3	Experiment	E	24	03Experiment	0	9.5	62	5	3	X
774	1	3	Experiment	F	1	03Experiment	49.5	11.5	33.5	6	3
790	1	3	Experiment	F	2	03Experiment	42.5	11.5	31.5	6	3
806	1	3	Experiment	F	3	03Experiment	43.5	11.5	29.5	6	3
822	1	3	Experiment	F	4	03Experiment	71.5	11.5	31.5	6	3
838	1	3	Experiment	F	5	03Experiment	78	11.5	35.5	6	3
854	1	3	Experiment	F	6	03Experiment	84	11.5	32.5	6	3
870	1	3	Experiment	F	7	03Experiment	72	11.5	34.5	6	3
886	1	3	Experiment	F	8	03Experiment	54.5	11.5	35	6	3
902	1	3	Experiment	F	9	03Experiment	0	11.5	0	6	3
918	1	3	Experiment	F	10	03Experiment	17.5	11.5	10.5	6	3
934	1	3	Experiment	F	11	03Experiment	80.5	11.5	46.5	6	3
950	1	3	Experiment	F	12	03Experiment	79.5	11.5	40.5	6	3
966	1	3	Experiment	F	13	03Experiment	72.5	11.5	78	6	3
982	1	3	Experiment	F	14	03Experiment	76	11.5	40.5	6	3
998	1	3	Experiment	F	15	03Experiment	80	11.5	37	6	3
1014	1	3	Experiment	F	16	03Experiment	80	11.5	38.5	6	3
1030	1	3	Experiment	F	17	03Experiment	52.5	11.5	30.5	6	3
1046	1	3	Experiment	F	18	03Experiment	72.5	11.5	37	6	3
1062	1	3	Experiment	F	19	03Experiment	73.5	11.5	43.5	6	3
1078	1	3	Experiment	F	20	03Experiment	47	11.5	39.5	6	3
1094	1	3	Experiment	F	21	03Experiment	65.5	11.5	46.5	6	3
1110	1	3	Experiment	F	22	03Experiment	88.5	11.5	61	6	3
1126	1	3	Experiment	F	23	03Experiment	79.5	11.5	48	6	3
1142	1	3	Experiment	F	24	03Experiment	60.5	11.5	37.5	6	3
775	1	3	Experiment	G	1	03Experiment	94	13.5	62	7	3
791	1	3	Experiment	G	2	03Experiment	25.5	13.5	27	7	3
807	1	3	Experiment	G	3	03Experiment	30	13.5	26	7	3
823	1	3	Experiment	G	4	03Experiment	72	13.5	29.5	7	3
839	1	3	Experiment	G	5	03Experiment	83.5	13.5	33.5	7	3
855	1	3	Experiment	G	6	03Experiment	64.5	13.5	30	7	3
871	1	3	Experiment	G	7	03Experiment	77	13.5	37.5	7	3
887	1	3	Experiment	G	8	03Experiment	66	13.5	37	7	3
903	1	3	Experiment	G	9	03Experiment	67.5	13.5	28.5	7	3
919	1	3	Experiment	G	10	03Experiment	75	13.5	32.5	7	3
935	1	3	Experiment	G	11	03Experiment	36.5	13.5	16	7	3
951	1	3	Experiment	G	12	03Experiment	84	13.5	38	7	3
967	1	3	Experiment	G	13	03Experiment	73	13.5	36	7	3
983	1	3	Experiment	G	14	03Experiment	64.5	13.5	39	7	3
999	1	3	Experiment	G	15	03Experiment	74	13.5	38	7	3
1015	1	3	Experiment	G	16	03Experiment	74.5	13.5	35.5	7	3
1031	1	3	Experiment	G	17	03Experiment	71	13.5	35	7	3
1047	1	3	Experiment	G	18	03Experiment	71.5	13.5	40	7	3
1063	1	3	Experiment	G	19	03Experiment	57	13.5	40.5	7	3
1079	1	3	Experiment	G	20	03Experiment	74.5	13.5	39.5	7	3
1095	1	3	Experiment	G	21	03Experiment	67.5	13.5	37	7	3
1111	1	3	Experiment	G	22	03Experiment	73.5	13.5	38	7	3
1127	1	3	Experiment	G	23	03Experiment	91.5	13.5	64	7	3
1143	1	3	Experiment	G	24	03Experiment	61.5	13.5	27	7	3
776	1	3	Experiment	H	1	03Experiment	62	15.5	33.5	8	3
792	1	3	Experiment	H	2	03Experiment	73	15.5	29.5	8	3
808	1	3	Experiment	H	3	03Experiment	44	15.5	27.5	8	3
824	1	3	Experiment	H	4	03Experiment	72.5	15.5	31	8	3
840	1	3	Experiment	H	5	03Experiment	45	15.5	30.5	8	3
856	1	3	Experiment	H	6	03Experiment	62.5	15.5	31	8	3
872	1	3	Experiment	H	7	03Experiment	21.5	15.5	34	8	3
888	1	3	Experiment	H	8	03Experiment	71	15.5	38.5	8	3
904	1	3	Experiment	H	9	03Experiment	76	15.5	36	8	3
920	1	3	Experiment	H	10	03Experiment	75.5	15.5	38	8	3
936	1	3	Experiment	H	11	03Experiment	82	15.5	40	8	3
952	1	3	Experiment	H	12	03Experiment	83.5	15.5	37	8	3
968	1	3	Experiment	H	13	03Experiment	57.5	15.5	40	8	3
984	1	3	Experiment	H	14	03Experiment	81.5	15.5	36.5	8	3
1000	1	3	Experiment	H	15	03Experiment	34.5	15.5	22.5	8	3
1016	1	3	Experiment	H	16	03Experiment	77.5	15.5	36	8	3
1032	1	3	Experiment	H	17	03Experiment	74	15.5	38	8	3
1048	1	3	Experiment	H	18	03Experiment	72.5	15.5	31	8	3
1064	1	3	Experiment	H	19	03Experiment	65	15.5	36.5	8	3
1080	1	3	Experiment	H	20	03Experiment	43	15.5	39.5	8	3
1096	1	3	Experiment	H	21	03Experiment	62	15.5	57.5	8	3
1112	1	3	Experiment	H	22	03Experiment	45.5	15.5	32	8	3
1128	1	3	Experiment	H	23	03Experiment	56.5	15.5	26.5	8	3
1144	1	3	Experiment	H	24	03Experiment	51	15.5	22	8	3
777	1	3	Experiment	I	1	03Experiment	25	17.5	25	9	3
793	1	3	Experiment	I	2	03Experiment	25	17.5	25.5	9	3
809	1	3	Experiment	I	3	03Experiment	38.5	17.5	21	9	3
825	1	3	Experiment	I	4	03Experiment	66	17.5	27.5	9	3
841	1	3	Experiment	I	5	03Experiment	71	17.5	15.5	9	3
857	1	3	Experiment	I	6	03Experiment	15.5	17.5	27	9	3
873	1	3	Experiment	I	7	03Experiment	34	17.5	37.5	9	3
889	1	3	Experiment	I	8	03Experiment	18	17.5	33.5	9	3
905	1	3	Experiment	I	9	03Experiment	48	17.5	44	9	3
921	1	3	Experiment	I	10	03Experiment	68.5	17.5	37	9	3
937	1	3	Experiment	I	11	03Experiment	63.5	17.5	35	9	3
953	1	3	Experiment	I	12	03Experiment	66	17.5	30.5	9	3
969	1	3	Experiment	I	13	03Experiment	73.5	17.5	37.5	9	3
985	1	3	Experiment	I	14	03Experiment	77	17.5	31.5	9	3
1001	1	3	Experiment	I	15	03Experiment	12	17.5	17.5	9	3
1017	1	3	Experiment	I	16	03Experiment	61	17.5	37	9	3
1033	1	3	Experiment	I	17	03Experiment	65	17.5	30.5	9	3
1049	1	3	Experiment	I	18	03Experiment	50	17.5	27	9	3
1065	1	3	Experiment	I	19	03Experiment	59.5	17.5	52.5	9	3
1081	1	3	Experiment	I	20	03Experiment	38	17.5	27	9	3
1097	1	3	Experiment	I	21	03Experiment	30	17.5	32	9	3
1113	1	3	Experiment	I	22	03Experiment	51.5	17.5	23	9	3
1129	1	3	Experiment	I	23	03Experiment	16.5	17.5	12	9	3
1145	1	3	Experiment	I	24	03Experiment	51	17.5	24	9	3
778	1	3	Experiment	J	1	03Experiment	28	19.5	26.5	10	3
794	1	3	Experiment	J	2	03Experiment	19.5	19.5	26.5	10	3
810	1	3	Experiment	J	3	03Experiment	36	19.5	34	10	3
826	1	3	Experiment	J	4	03Experiment	43	19.5	24	10	3
842	1	3	Experiment	J	5	03Experiment	17	19.5	25.5	10	3
858	1	3	Experiment	J	6	03Experiment	11.5	19.5	26	10	3
874	1	3	Experiment	J	7	03Experiment	49.5	19.5	41	10	3
890	1	3	Experiment	J	8	03Experiment	17.5	19.5	33	10	3
906	1	3	Experiment	J	9	03Experiment	40	19.5	33	10	3
922	1	3	Experiment	J	10	03Experiment	58	19.5	25	10	3
938	1	3	Experiment	J	11	03Experiment	60	19.5	28.5	10	3
954	1	3	Experiment	J	12	03Experiment	65	19.5	31.5	10	3
970	1	3	Experiment	J	13	03Experiment	64	19.5	29	10	3
986	1	3	Experiment	J	14	03Experiment	73	19.5	35.5	10	3
1002	1	3	Experiment	J	15	03Experiment	41	19.5	31.5	10	3
1018	1	3	Experiment	J	16	03Experiment	51	19.5	28.5	10	3
1034	1	3	Experiment	J	17	03Experiment	59	19.5	33	10	3
1050	1	3	Experiment	J	18	03Experiment	46.5	19.5	34.5	10	3
1066	1	3	Experiment	J	19	03Experiment	63.5	19.5	49	10	3
1082	1	3	Experiment	J	20	03Experiment	30	19.5	25.5	10	3
1098	1	3	Experiment	J	21	03Experiment	33	19.5	38.5	10	3
1114	1	3	Experiment	J	22	03Experiment	49.5	19.5	23	10	3
1130	1	3	Experiment	J	23	03Experiment	50	19.5	28	10	3
1146	1	3	Experiment	J	24	03Experiment	44	19.5	16	10	3
779	1	3	Experiment	K	1	03Experiment	28.5	21.5	24.5	11	3
795	1	3	Experiment	K	2	03Experiment	18.5	21.5	19.5	11	3
811	1	3	Experiment	K	3	03Experiment	14.5	21.5	19	11	3
827	1	3	Experiment	K	4	03Experiment	14	21.5	20.5	11	3
843	1	3	Experiment	K	5	03Experiment	16	21.5	20	11	3
859	1	3	Experiment	K	6	03Experiment	18	21.5	31.5	11	3
875	1	3	Experiment	K	7	03Experiment	15	21.5	22.5	11	3
891	1	3	Experiment	K	8	03Experiment	11.5	21.5	31.5	11	3
907	1	3	Experiment	K	9	03Experiment	35.5	21.5	34	11	3
923	1	3	Experiment	K	10	03Experiment	39.5	21.5	36	11	3
939	1	3	Experiment	K	11	03Experiment	32.5	21.5	34	11	3
955	1	3	Experiment	K	12	03Experiment	59.5	21.5	37.5	11	3
971	1	3	Experiment	K	13	03Experiment	35	21.5	21.5	11	3
987	1	3	Experiment	K	14	03Experiment	17.5	21.5	28	11	3
1003	1	3	Experiment	K	15	03Experiment	2	21.5	1	11	3
1019	1	3	Experiment	K	16	03Experiment	42	21.5	32	11	3
1035	1	3	Experiment	K	17	03Experiment	13	21.5	17.5	11	3
1051	1	3	Experiment	K	18	03Experiment	35	21.5	32	11	3
1067	1	3	Experiment	K	19	03Experiment	37.5	21.5	41.5	11	3
1083	1	3	Experiment	K	20	03Experiment	43	21.5	37.5	11	3
1099	1	3	Experiment	K	21	03Experiment	19	21.5	19	11	3
1115	1	3	Experiment	K	22	03Experiment	62.5	21.5	31	11	3
1131	1	3	Experiment	K	23	03Experiment	25	21.5	21.5	11	3
1147	1	3	Experiment	K	24	03Experiment	47	21.5	37.5	11	3
780	1	3	Experiment	L	1	03Experiment	47	23.5	26.5	12	3
796	1	3	Experiment	L	2	03Experiment	18	23.5	24	12	3
812	1	3	Experiment	L	3	03Experiment	12	23.5	24.5	12	3
828	1	3	Experiment	L	4	03Experiment	14.5	23.5	21.5	12	3
844	1	3	Experiment	L	5	03Experiment	14	23.5	18	12	3
860	1	3	Experiment	L	6	03Experiment	13.5	23.5	26.5	12	3
876	1	3	Experiment	L	7	03Experiment	13	23.5	23	12	3
892	1	3	Experiment	L	8	03Experiment	13.5	23.5	26	12	3
908	1	3	Experiment	L	9	03Experiment	40.5	23.5	29	12	3
924	1	3	Experiment	L	10	03Experiment	29.5	23.5	33	12	3
940	1	3	Experiment	L	11	03Experiment	32.5	23.5	39.5	12	3
956	1	3	Experiment	L	12	03Experiment	20	23.5	32.5	12	3
972	1	3	Experiment	L	13	03Experiment	32	23.5	34	12	3
988	1	3	Experiment	L	14	03Experiment	42	23.5	28.5	12	3
1004	1	3	Experiment	L	15	03Experiment	34	23.5	30	12	3
1020	1	3	Experiment	L	16	03Experiment	0	23.5	0	12	3
1036	1	3	Experiment	L	17	03Experiment	24	23.5	30	12	3
1052	1	3	Experiment	L	18	03Experiment	24	23.5	11.5	12	3
1068	1	3	Experiment	L	19	03Experiment	65	23.5	44	12	3
1084	1	3	Experiment	L	20	03Experiment	0	23.5	0	12	3
1100	1	3	Experiment	L	21	03Experiment	30	23.5	30.5	12	3
1116	1	3	Experiment	L	22	03Experiment	0.5	23.5	0.5	12	3
1132	1	3	Experiment	L	23	03Experiment	57	23.5	39.5	12	3
1148	1	3	Experiment	L	24	03Experiment	69	23.5	35.5	12	3
781	1	3	Experiment	M	1	03Experiment	25.5	25.5	19	13	3
797	1	3	Experiment	M	2	03Experiment	19	25.5	23.5	13	3
813	1	3	Experiment	M	3	03Experiment	48	25.5	41.5	13	3
829	1	3	Experiment	M	4	03Experiment	11.5	25.5	14	13	3
845	1	3	Experiment	M	5	03Experiment	15	25.5	23	13	3
861	1	3	Experiment	M	6	03Experiment	11	25.5	20.5	13	3
877	1	3	Experiment	M	7	03Experiment	11	25.5	22	13	3
893	1	3	Experiment	M	8	03Experiment	28	25.5	35.5	13	3
909	1	3	Experiment	M	9	03Experiment	14.5	25.5	29	13	3
925	1	3	Experiment	M	10	03Experiment	11.5	25.5	26	13	3
941	1	3	Experiment	M	11	03Experiment	47.5	25.5	53.5	13	3
957	1	3	Experiment	M	12	03Experiment	34	25.5	30	13	3
973	1	3	Experiment	M	13	03Experiment	13	25.5	27	13	3
989	1	3	Experiment	M	14	03Experiment	17.5	25.5	25	13	3
1005	1	3	Experiment	M	15	03Experiment	17.5	25.5	26	13	3
1021	1	3	Experiment	M	16	03Experiment	17.5	25.5	27	13	3
1037	1	3	Experiment	M	17	03Experiment	17.5	25.5	25.5	13	3
1053	1	3	Experiment	M	18	03Experiment	32	25.5	27.5	13	3
1069	1	3	Experiment	M	19	03Experiment	32	25.5	26.5	13	3
1085	1	3	Experiment	M	20	03Experiment	23.5	25.5	31.5	13	3
1101	1	3	Experiment	M	21	03Experiment	31.5	25.5	18.5	13	3
1117	1	3	Experiment	M	22	03Experiment	27.5	25.5	31.5	13	3
1133	1	3	Experiment	M	23	03Experiment	22.5	25.5	26	13	3
1149	1	3	Experiment	M	24	03Experiment	49	25.5	36.5	13	3
782	1	3	Experiment	N	1	03Experiment	27.5	27.5	12	14	3
798	1	3	Experiment	N	2	03Experiment	12	27.5	17.5	14	3
814	1	3	Experiment	N	3	03Experiment	15	27.5	22.5	14	3
830	1	3	Experiment	N	4	03Experiment	11.5	27.5	20.5	14	3
846	1	3	Experiment	N	5	03Experiment	17	27.5	28	14	3
862	1	3	Experiment	N	6	03Experiment	10.5	27.5	18	14	3
878	1	3	Experiment	N	7	03Experiment	10	27.5	22	14	3
894	1	3	Experiment	N	8	03Experiment	10	27.5	24.5	14	3
910	1	3	Experiment	N	9	03Experiment	29	27.5	27.5	14	3
926	1	3	Experiment	N	10	03Experiment	10.5	27.5	27	14	3
942	1	3	Experiment	N	11	03Experiment	27	27.5	49.5	14	3
958	1	3	Experiment	N	12	03Experiment	14	27.5	22.5	14	3
974	1	3	Experiment	N	13	03Experiment	15	27.5	14	14	3
990	1	3	Experiment	N	14	03Experiment	15	27.5	30.5	14	3
1006	1	3	Experiment	N	15	03Experiment	17.5	27.5	25.5	14	3
1022	1	3	Experiment	N	16	03Experiment	22.5	27.5	34	14	3
1038	1	3	Experiment	N	17	03Experiment	19.5	27.5	29.5	14	3
1054	1	3	Experiment	N	18	03Experiment	17	27.5	19	14	3
1070	1	3	Experiment	N	19	03Experiment	22	27.5	26.5	14	3
1086	1	3	Experiment	N	20	03Experiment	17.5	27.5	20.5	14	3
1102	1	3	Experiment	N	21	03Experiment	21	27.5	23.5	14	3
1118	1	3	Experiment	N	22	03Experiment	14	27.5	23.5	14	3
1134	1	3	Experiment	N	23	03Experiment	23	27.5	26	14	3
1150	1	3	Experiment	N	24	03Experiment	37.5	27.5	30.5	14	3
783	1	3	Experiment	O	1	03Experiment	34	29.5	25	15	3
799	1	3	Experiment	O	2	03Experiment	29.5	29.5	30	15	3
815	1	3	Experiment	O	3	03Experiment	11.5	29.5	14.5	15	3
831	1	3	Experiment	O	4	03Experiment	11.5	29.5	29	15	3
847	1	3	Experiment	O	5	03Experiment	11	29.5	14	15	3
863	1	3	Experiment	O	6	03Experiment	20.5	29.5	35.5	15	3
879	1	3	Experiment	O	7	03Experiment	23	29.5	19.5	15	3
895	1	3	Experiment	O	8	03Experiment	38.5	29.5	31.5	15	3
911	1	3	Experiment	O	9	03Experiment	17	29.5	21	15	3
927	1	3	Experiment	O	10	03Experiment	11	29.5	24	15	3
943	1	3	Experiment	O	11	03Experiment	24	29.5	27.5	15	3
959	1	3	Experiment	O	12	03Experiment	45.5	29.5	33.5	15	3
975	1	3	Experiment	O	13	03Experiment	18.5	29.5	26.5	15	3
991	1	3	Experiment	O	14	03Experiment	11.5	29.5	15.5	15	3
1007	1	3	Experiment	O	15	03Experiment	16.5	29.5	19.5	15	3
1023	1	3	Experiment	O	16	03Experiment	19.5	29.5	22	15	3
1039	1	3	Experiment	O	17	03Experiment	48	29.5	43	15	3
1055	1	3	Experiment	O	18	03Experiment	37	29.5	26.5	15	3
1071	1	3	Experiment	O	19	03Experiment	25	29.5	22	15	3
1087	1	3	Experiment	O	20	03Experiment	20	29.5	14	15	3
1103	1	3	Experiment	O	21	03Experiment	16	29.5	24.5	15	3
1119	1	3	Experiment	O	22	03Experiment	16	29.5	23	15	3
1135	1	3	Experiment	O	23	03Experiment	25	29.5	29.5	15	3
1151	1	3	Experiment	O	24	03Experiment	40.5	29.5	23.5	15	3
784	1	3	Experiment	P	1	03Experiment	50	31.5	29	16	3
800	1	3	Experiment	P	2	03Experiment	31.5	31.5	20	16	3
816	1	3	Experiment	P	3	03Experiment	21	31.5	24.5	16	3
832	1	3	Experiment	P	4	03Experiment	26	31.5	24	16	3
848	1	3	Experiment	P	5	03Experiment	20	31.5	25.5	16	3
864	1	3	Experiment	P	6	03Experiment	28	31.5	24.5	16	3
880	1	3	Experiment	P	7	03Experiment	42	31.5	21	16	3
896	1	3	Experiment	P	8	03Experiment	33.5	31.5	16	16	3
912	1	3	Experiment	P	9	03Experiment	8	31.5	1	16	3
928	1	3	Experiment	P	10	03Experiment	50.5	31.5	23	16	3
944	1	3	Experiment	P	11	03Experiment	48.5	31.5	20	16	3
960	1	3	Experiment	P	12	03Experiment	56	31.5	35.5	16	3
976	1	3	Experiment	P	13	03Experiment	12.5	31.5	21.5	16	3
992	1	3	Experiment	P	14	03Experiment	37.5	31.5	30	16	3
1008	1	3	Experiment	P	15	03Experiment	43	31.5	41	16	3
1024	1	3	Experiment	P	16	03Experiment	50.5	31.5	24	16	3
1040	1	3	Experiment	P	17	03Experiment	67	31.5	28.5	16	3
1056	1	3	Experiment	P	18	03Experiment	62.5	31.5	28.5	16	3
1072	1	3	Experiment	P	19	03Experiment	50	31.5	19.5	16	3
1088	1	3	Experiment	P	20	03Experiment	72	31.5	35	16	3
1104	1	3	Experiment	P	21	03Experiment	70	31.5	46	16	3
1120	1	3	Experiment	P	22	03Experiment	38	31.5	19	16	3
1136	1	3	Experiment	P	23	03Experiment	24.5	31.5	24	16	3
1152	1	3	Experiment	P	24	03Experiment	47.5	31.5	21.5	16	3
1153	1	4	Experiment	A	1	04Experiment	0	1.5	50	1	4	X
1169	1	4	Experiment	A	2	04Experiment	0	1.5	32	1	4	X
1185	1	4	Experiment	A	3	04Experiment	0	1.5	37.5	1	4	X
1201	1	4	Experiment	A	4	04Experiment	0	1.5	35.5	1	4	X
1217	1	4	Experiment	A	5	04Experiment	40.5	1.5	69.5	1	4
1233	1	4	Experiment	A	6	04Experiment	23.5	1.5	45	1	4
1249	1	4	Experiment	A	7	04Experiment	41.5	1.5	57	1	4
1265	1	4	Experiment	A	8	04Experiment	10.5	1.5	31	1	4
1281	1	4	Experiment	A	9	04Experiment	16	1.5	25.5	1	4
1297	1	4	Experiment	A	10	04Experiment	36.5	1.5	55	1	4
1313	1	4	Experiment	A	11	04Experiment	24	1.5	48.5	1	4
1329	1	4	Experiment	A	12	04Experiment	54	1.5	73.5	1	4
1345	1	4	Experiment	A	13	04Experiment	30.5	1.5	49	1	4
1361	1	4	Experiment	A	14	04Experiment	26	1.5	52.5	1	4
1377	1	4	Experiment	A	15	04Experiment	30.5	1.5	49	1	4
1393	1	4	Experiment	A	16	04Experiment	38	1.5	54.5	1	4
1409	1	4	Experiment	A	17	04Experiment	38	1.5	61	1	4
1425	1	4	Experiment	A	18	04Experiment	54.5	1.5	85.5	1	4
1441	1	4	Experiment	A	19	04Experiment	34.5	1.5	50	1	4
1457	1	4	Experiment	A	20	04Experiment	22	1.5	44.5	1	4
1473	1	4	Experiment	A	21	04Experiment	14.5	1.5	31.5	1	4
1489	1	4	Experiment	A	22	04Experiment	40.5	1.5	49.5	1	4
1505	1	4	Experiment	A	23	04Experiment	19	1.5	46	1	4
1521	1	4	Experiment	A	24	04Experiment	0	1.5	65.5	1	4	X
1154	1	4	Experiment	B	1	04Experiment	14.5	3.5	42	2	4	X
1170	1	4	Experiment	B	2	04Experiment	0	3.5	31	2	4	X
1186	1	4	Experiment	B	3	04Experiment	2.5	3.5	39.5	2	4	X
1202	1	4	Experiment	B	4	04Experiment	26.5	3.5	45	2	4	X
1218	1	4	Experiment	B	5	04Experiment	19	3.5	44	2	4
1234	1	4	Experiment	B	6	04Experiment	25	3.5	45.5	2	4
1250	1	4	Experiment	B	7	04Experiment	27	3.5	55	2	4
1266	1	4	Experiment	B	8	04Experiment	32	3.5	48	2	4
1282	1	4	Experiment	B	9	04Experiment	19	3.5	17.5	2	4
1298	1	4	Experiment	B	10	04Experiment	18	3.5	48	2	4
1314	1	4	Experiment	B	11	04Experiment	34.5	3.5	55	2	4
1330	1	4	Experiment	B	12	04Experiment	34	3.5	50	2	4
1346	1	4	Experiment	B	13	04Experiment	50.5	3.5	61	2	4
1362	1	4	Experiment	B	14	04Experiment	35.5	3.5	50.5	2	4
1378	1	4	Experiment	B	15	04Experiment	39	3.5	54	2	4
1394	1	4	Experiment	B	16	04Experiment	30.5	3.5	51.5	2	4
1410	1	4	Experiment	B	17	04Experiment	27.5	3.5	40.5	2	4
1426	1	4	Experiment	B	18	04Experiment	33.5	3.5	52	2	4
1442	1	4	Experiment	B	19	04Experiment	40	3.5	57.5	2	4
1458	1	4	Experiment	B	20	04Experiment	35.5	3.5	53	2	4
1474	1	4	Experiment	B	21	04Experiment	35	3.5	58	2	4
1490	1	4	Experiment	B	22	04Experiment	29	3.5	50.5	2	4
1506	1	4	Experiment	B	23	04Experiment	10.5	3.5	55.5	2	4	X
1522	1	4	Experiment	B	24	04Experiment	0	3.5	44.5	2	4	X
1155	1	4	Experiment	C	1	04Experiment	16	5.5	32	3	4
1171	1	4	Experiment	C	2	04Experiment	21.5	5.5	34.5	3	4
1187	1	4	Experiment	C	3	04Experiment	22	5.5	38	3	4
1203	1	4	Experiment	C	4	04Experiment	23	5.5	19	3	4
1219	1	4	Experiment	C	5	04Experiment	62	5.5	75.5	3	4
1235	1	4	Experiment	C	6	04Experiment	44	5.5	48	3	4
1251	1	4	Experiment	C	7	04Experiment	22.5	5.5	22.5	3	4
1267	1	4	Experiment	C	8	04Experiment	27	5.5	27	3	4
1283	1	4	Experiment	C	9	04Experiment	42.5	5.5	52	3	4
1299	1	4	Experiment	C	10	04Experiment	33	5.5	43	3	4
1315	1	4	Experiment	C	11	04Experiment	36.5	5.5	45.5	3	4
1331	1	4	Experiment	C	12	04Experiment	53	5.5	87	3	4
1347	1	4	Experiment	C	13	04Experiment	32.5	5.5	46.5	3	4
1363	1	4	Experiment	C	14	04Experiment	32.5	5.5	40	3	4
1379	1	4	Experiment	C	15	04Experiment	35.5	5.5	32	3	4
1395	1	4	Experiment	C	16	04Experiment	36	5.5	47.5	3	4
1411	1	4	Experiment	C	17	04Experiment	38	5.5	47.5	3	4
1427	1	4	Experiment	C	18	04Experiment	34.5	5.5	49	3	4
1443	1	4	Experiment	C	19	04Experiment	47	5.5	67	3	4
1459	1	4	Experiment	C	20	04Experiment	40.5	5.5	47.5	3	4
1475	1	4	Experiment	C	21	04Experiment	35.5	5.5	43	3	4
1491	1	4	Experiment	C	22	04Experiment	33.5	5.5	52	3	4
1507	1	4	Experiment	C	23	04Experiment	0	5.5	34	3	4	X
1523	1	4	Experiment	C	24	04Experiment	0	5.5	42	3	4	X
1156	1	4	Experiment	D	1	04Experiment	28.5	7.5	38.5	4	4
1172	1	4	Experiment	D	2	04Experiment	28	7.5	39	4	4
1188	1	4	Experiment	D	3	04Experiment	37	7.5	39.5	4	4
1204	1	4	Experiment	D	4	04Experiment	34	7.5	35	4	4
1220	1	4	Experiment	D	5	04Experiment	22	7.5	31	4	4
1236	1	4	Experiment	D	6	04Experiment	30	7.5	24	4	4
1252	1	4	Experiment	D	7	04Experiment	37.5	7.5	46	4	4
1268	1	4	Experiment	D	8	04Experiment	36.5	7.5	37.5	4	4
1284	1	4	Experiment	D	9	04Experiment	24	7.5	14.5	4	4
1300	1	4	Experiment	D	10	04Experiment	35.5	7.5	45	4	4
1316	1	4	Experiment	D	11	04Experiment	33	7.5	49	4	4
1332	1	4	Experiment	D	12	04Experiment	41.5	7.5	52	4	4
1348	1	4	Experiment	D	13	04Experiment	28	7.5	38.5	4	4
1364	1	4	Experiment	D	14	04Experiment	33	7.5	47	4	4
1380	1	4	Experiment	D	15	04Experiment	31	7.5	45	4	4
1396	1	4	Experiment	D	16	04Experiment	34.5	7.5	46.5	4	4
1412	1	4	Experiment	D	17	04Experiment	35.5	7.5	45.5	4	4
1428	1	4	Experiment	D	18	04Experiment	30.5	7.5	36.5	4	4
1444	1	4	Experiment	D	19	04Experiment	39.5	7.5	45	4	4
1460	1	4	Experiment	D	20	04Experiment	34.5	7.5	44.5	4	4
1476	1	4	Experiment	D	21	04Experiment	26	7.5	35.5	4	4
1492	1	4	Experiment	D	22	04Experiment	38.5	7.5	70	4	4
1508	1	4	Experiment	D	23	04Experiment	0	7.5	52.5	4	4	X
1524	1	4	Experiment	D	24	04Experiment	0	7.5	44.5	4	4	X
1157	1	4	Experiment	E	1	04Experiment	33.5	9.5	33.5	5	4
1173	1	4	Experiment	E	2	04Experiment	23	9.5	32.5	5	4
1189	1	4	Experiment	E	3	04Experiment	42.5	9.5	54.5	5	4
1205	1	4	Experiment	E	4	04Experiment	30.5	9.5	34	5	4
1221	1	4	Experiment	E	5	04Experiment	35	9.5	49	5	4
1237	1	4	Experiment	E	6	04Experiment	47.5	9.5	53.5	5	4
1253	1	4	Experiment	E	7	04Experiment	30.5	9.5	35	5	4
1269	1	4	Experiment	E	8	04Experiment	24	9.5	23	5	4
1285	1	4	Experiment	E	9	04Experiment	24.5	9.5	25	5	4
1301	1	4	Experiment	E	10	04Experiment	33	9.5	46	5	4
1317	1	4	Experiment	E	11	04Experiment	42	9.5	61.5	5	4
1333	1	4	Experiment	E	12	04Experiment	37.5	9.5	48	5	4
1349	1	4	Experiment	E	13	04Experiment	40	9.5	45.5	5	4
1365	1	4	Experiment	E	14	04Experiment	32	9.5	45	5	4
1381	1	4	Experiment	E	15	04Experiment	22.5	9.5	23.5	5	4
1397	1	4	Experiment	E	16	04Experiment	39.5	9.5	47.5	5	4
1413	1	4	Experiment	E	17	04Experiment	42	9.5	50.5	5	4
1429	1	4	Experiment	E	18	04Experiment	34.5	9.5	42	5	4
1445	1	4	Experiment	E	19	04Experiment	33.5	9.5	39.5	5	4
1461	1	4	Experiment	E	20	04Experiment	28	9.5	41	5	4
1477	1	4	Experiment	E	21	04Experiment	21.5	9.5	36.5	5	4
1493	1	4	Experiment	E	22	04Experiment	23	9.5	43.5	5	4
1509	1	4	Experiment	E	23	04Experiment	35.5	9.5	61.5	5	4
1525	1	4	Experiment	E	24	04Experiment	0	9.5	62	5	4	X
1158	1	4	Experiment	F	1	04Experiment	10.5	11.5	33.5	6	4
1174	1	4	Experiment	F	2	04Experiment	21.5	11.5	31.5	6	4
1190	1	4	Experiment	F	3	04Experiment	22.5	11.5	29.5	6	4
1206	1	4	Experiment	F	4	04Experiment	29.5	11.5	31.5	6	4
1222	1	4	Experiment	F	5	04Experiment	31.5	11.5	35.5	6	4
1238	1	4	Experiment	F	6	04Experiment	32	11.5	32.5	6	4
1254	1	4	Experiment	F	7	04Experiment	34	11.5	34.5	6	4
1270	1	4	Experiment	F	8	04Experiment	16	11.5	35	6	4
1286	1	4	Experiment	F	9	04Experiment	0.5	11.5	0	6	4
1302	1	4	Experiment	F	10	04Experiment	11	11.5	10.5	6	4
1318	1	4	Experiment	F	11	04Experiment	35.5	11.5	46.5	6	4
1334	1	4	Experiment	F	12	04Experiment	29.5	11.5	40.5	6	4
1350	1	4	Experiment	F	13	04Experiment	52.5	11.5	78	6	4
1366	1	4	Experiment	F	14	04Experiment	34.5	11.5	40.5	6	4
1382	1	4	Experiment	F	15	04Experiment	32	11.5	37	6	4
1398	1	4	Experiment	F	16	04Experiment	32.5	11.5	38.5	6	4
1414	1	4	Experiment	F	17	04Experiment	27	11.5	30.5	6	4
1430	1	4	Experiment	F	18	04Experiment	34.5	11.5	37	6	4
1446	1	4	Experiment	F	19	04Experiment	36.5	11.5	43.5	6	4
1462	1	4	Experiment	F	20	04Experiment	34.5	11.5	39.5	6	4
1478	1	4	Experiment	F	21	04Experiment	30.5	11.5	46.5	6	4
1494	1	4	Experiment	F	22	04Experiment	47.5	11.5	61	6	4
1510	1	4	Experiment	F	23	04Experiment	29	11.5	48	6	4
1526	1	4	Experiment	F	24	04Experiment	0	11.5	37.5	6	4	X
1159	1	4	Experiment	G	1	04Experiment	44.5	13.5	62	7	4
1175	1	4	Experiment	G	2	04Experiment	18.5	13.5	27	7	4
1191	1	4	Experiment	G	3	04Experiment	16	13.5	26	7	4
1207	1	4	Experiment	G	4	04Experiment	26.5	13.5	29.5	7	4
1223	1	4	Experiment	G	5	04Experiment	26.5	13.5	33.5	7	4
1239	1	4	Experiment	G	6	04Experiment	27	13.5	30	7	4
1255	1	4	Experiment	G	7	04Experiment	33	13.5	37.5	7	4
1271	1	4	Experiment	G	8	04Experiment	35	13.5	37	7	4
1287	1	4	Experiment	G	9	04Experiment	23.5	13.5	28.5	7	4
1303	1	4	Experiment	G	10	04Experiment	32	13.5	32.5	7	4
1319	1	4	Experiment	G	11	04Experiment	16.5	13.5	16	7	4
1335	1	4	Experiment	G	12	04Experiment	31	13.5	38	7	4
1351	1	4	Experiment	G	13	04Experiment	26.5	13.5	36	7	4
1367	1	4	Experiment	G	14	04Experiment	30	13.5	39	7	4
1383	1	4	Experiment	G	15	04Experiment	32	13.5	38	7	4
1399	1	4	Experiment	G	16	04Experiment	30	13.5	35.5	7	4
1415	1	4	Experiment	G	17	04Experiment	29.5	13.5	35	7	4
1431	1	4	Experiment	G	18	04Experiment	35	13.5	40	7	4
1447	1	4	Experiment	G	19	04Experiment	35.5	13.5	40.5	7	4
1463	1	4	Experiment	G	20	04Experiment	34	13.5	39.5	7	4
1479	1	4	Experiment	G	21	04Experiment	27	13.5	37	7	4
1495	1	4	Experiment	G	22	04Experiment	24	13.5	38	7	4
1511	1	4	Experiment	G	23	04Experiment	40.5	13.5	64	7	4
1527	1	4	Experiment	G	24	04Experiment	13.5	13.5	27	7	4
1160	1	4	Experiment	H	1	04Experiment	25	15.5	33.5	8	4
1176	1	4	Experiment	H	2	04Experiment	22.5	15.5	29.5	8	4
1192	1	4	Experiment	H	3	04Experiment	22	15.5	27.5	8	4
1208	1	4	Experiment	H	4	04Experiment	23	15.5	31	8	4
1224	1	4	Experiment	H	5	04Experiment	25.5	15.5	30.5	8	4
1240	1	4	Experiment	H	6	04Experiment	30	15.5	31	8	4
1256	1	4	Experiment	H	7	04Experiment	36.5	15.5	34	8	4
1272	1	4	Experiment	H	8	04Experiment	33	15.5	38.5	8	4
1288	1	4	Experiment	H	9	04Experiment	32.5	15.5	36	8	4
1304	1	4	Experiment	H	10	04Experiment	28	15.5	38	8	4
1320	1	4	Experiment	H	11	04Experiment	34	15.5	40	8	4
1336	1	4	Experiment	H	12	04Experiment	30	15.5	37	8	4
1352	1	4	Experiment	H	13	04Experiment	35	15.5	40	8	4
1368	1	4	Experiment	H	14	04Experiment	32	15.5	36.5	8	4
1384	1	4	Experiment	H	15	04Experiment	24	15.5	22.5	8	4
1400	1	4	Experiment	H	16	04Experiment	30	15.5	36	8	4
1416	1	4	Experiment	H	17	04Experiment	28.5	15.5	38	8	4
1432	1	4	Experiment	H	18	04Experiment	26.5	15.5	31	8	4
1448	1	4	Experiment	H	19	04Experiment	35	15.5	36.5	8	4
1464	1	4	Experiment	H	20	04Experiment	32	15.5	39.5	8	4
1480	1	4	Experiment	H	21	04Experiment	43.5	15.5	57.5	8	4
1496	1	4	Experiment	H	22	04Experiment	18.5	15.5	32	8	4
1512	1	4	Experiment	H	23	04Experiment	16.5	15.5	26.5	8	4
1528	1	4	Experiment	H	24	04Experiment	0	15.5	22	8	4
1161	1	4	Experiment	I	1	04Experiment	17	17.5	25	9	4
1177	1	4	Experiment	I	2	04Experiment	17.5	17.5	25.5	9	4
1193	1	4	Experiment	I	3	04Experiment	18	17.5	21	9	4
1209	1	4	Experiment	I	4	04Experiment	25	17.5	27.5	9	4
1225	1	4	Experiment	I	5	04Experiment	13.5	17.5	15.5	9	4
1241	1	4	Experiment	I	6	04Experiment	23.5	17.5	27	9	4
1257	1	4	Experiment	I	7	04Experiment	37.5	17.5	37.5	9	4
1273	1	4	Experiment	I	8	04Experiment	29.5	17.5	33.5	9	4
1289	1	4	Experiment	I	9	04Experiment	39.5	17.5	44	9	4
1305	1	4	Experiment	I	10	04Experiment	36	17.5	37	9	4
1321	1	4	Experiment	I	11	04Experiment	22.5	17.5	35	9	4
1337	1	4	Experiment	I	12	04Experiment	27	17.5	30.5	9	4
1353	1	4	Experiment	I	13	04Experiment	42	17.5	37.5	9	4
1369	1	4	Experiment	I	14	04Experiment	25	17.5	31.5	9	4
1385	1	4	Experiment	I	15	04Experiment	12	17.5	17.5	9	4
1401	1	4	Experiment	I	16	04Experiment	29	17.5	37	9	4
1417	1	4	Experiment	I	17	04Experiment	27.5	17.5	30.5	9	4
1433	1	4	Experiment	I	18	04Experiment	31	17.5	27	9	4
1449	1	4	Experiment	I	19	04Experiment	39.5	17.5	52.5	9	4
1465	1	4	Experiment	I	20	04Experiment	23	17.5	27	9	4
1481	1	4	Experiment	I	21	04Experiment	1.5	17.5	32	9	4
1497	1	4	Experiment	I	22	04Experiment	25.5	17.5	23	9	4
1513	1	4	Experiment	I	23	04Experiment	12	17.5	12	9	4
1529	1	4	Experiment	I	24	04Experiment	26.5	17.5	24	9	4
1162	1	4	Experiment	J	1	04Experiment	19	19.5	26.5	10	4
1178	1	4	Experiment	J	2	04Experiment	17.5	19.5	26.5	10	4
1194	1	4	Experiment	J	3	04Experiment	31	19.5	34	10	4
1210	1	4	Experiment	J	4	04Experiment	23	19.5	24	10	4
1226	1	4	Experiment	J	5	04Experiment	19	19.5	25.5	10	4
1242	1	4	Experiment	J	6	04Experiment	26	19.5	26	10	4
1258	1	4	Experiment	J	7	04Experiment	35	19.5	41	10	4
1274	1	4	Experiment	J	8	04Experiment	27	19.5	33	10	4
1290	1	4	Experiment	J	9	04Experiment	25	19.5	33	10	4
1306	1	4	Experiment	J	10	04Experiment	21.5	19.5	25	10	4
1322	1	4	Experiment	J	11	04Experiment	33	19.5	28.5	10	4
1338	1	4	Experiment	J	12	04Experiment	25.5	19.5	31.5	10	4
1354	1	4	Experiment	J	13	04Experiment	23.5	19.5	29	10	4
1370	1	4	Experiment	J	14	04Experiment	25.5	19.5	35.5	10	4
1386	1	4	Experiment	J	15	04Experiment	34.5	19.5	31.5	10	4
1402	1	4	Experiment	J	16	04Experiment	24.5	19.5	28.5	10	4
1418	1	4	Experiment	J	17	04Experiment	24.5	19.5	33	10	4
1434	1	4	Experiment	J	18	04Experiment	26	19.5	34.5	10	4
1450	1	4	Experiment	J	19	04Experiment	37.5	19.5	49	10	4
1466	1	4	Experiment	J	20	04Experiment	22.5	19.5	25.5	10	4
1482	1	4	Experiment	J	21	04Experiment	6	19.5	38.5	10	4
1498	1	4	Experiment	J	22	04Experiment	5	19.5	23	10	4
1514	1	4	Experiment	J	23	04Experiment	15	19.5	28	10	4
1530	1	4	Experiment	J	24	04Experiment	5	19.5	16	10	4
1163	1	4	Experiment	K	1	04Experiment	6.5	21.5	24.5	11	4
1179	1	4	Experiment	K	2	04Experiment	15.5	21.5	19.5	11	4
1195	1	4	Experiment	K	3	04Experiment	16.5	21.5	19	11	4
1211	1	4	Experiment	K	4	04Experiment	17	21.5	20.5	11	4
1227	1	4	Experiment	K	5	04Experiment	19.5	21.5	20	11	4
1243	1	4	Experiment	K	6	04Experiment	25	21.5	31.5	11	4
1259	1	4	Experiment	K	7	04Experiment	18.5	21.5	22.5	11	4
1275	1	4	Experiment	K	8	04Experiment	26	21.5	31.5	11	4
1291	1	4	Experiment	K	9	04Experiment	27.5	21.5	34	11	4
1307	1	4	Experiment	K	10	04Experiment	23	21.5	36	11	4
1323	1	4	Experiment	K	11	04Experiment	30	21.5	34	11	4
1339	1	4	Experiment	K	12	04Experiment	23.5	21.5	37.5	11	4
1355	1	4	Experiment	K	13	04Experiment	14	21.5	21.5	11	4
1371	1	4	Experiment	K	14	04Experiment	25	21.5	28	11	4
1387	1	4	Experiment	K	15	04Experiment	0	21.5	1	11	4
1403	1	4	Experiment	K	16	04Experiment	30	21.5	32	11	4
1419	1	4	Experiment	K	17	04Experiment	13	21.5	17.5	11	4
1435	1	4	Experiment	K	18	04Experiment	20	21.5	32	11	4
1451	1	4	Experiment	K	19	04Experiment	25.5	21.5	41.5	11	4
1467	1	4	Experiment	K	20	04Experiment	29	21.5	37.5	11	4
1483	1	4	Experiment	K	21	04Experiment	11.5	21.5	19	11	4
1499	1	4	Experiment	K	22	04Experiment	27.5	21.5	31	11	4
1515	1	4	Experiment	K	23	04Experiment	8	21.5	21.5	11	4
1531	1	4	Experiment	K	24	04Experiment	12	21.5	37.5	11	4
1164	1	4	Experiment	L	1	04Experiment	19.5	23.5	26.5	12	4
1180	1	4	Experiment	L	2	04Experiment	15.5	23.5	24	12	4
1196	1	4	Experiment	L	3	04Experiment	14.5	23.5	24.5	12	4
1212	1	4	Experiment	L	4	04Experiment	18.5	23.5	21.5	12	4
1228	1	4	Experiment	L	5	04Experiment	15.5	23.5	18	12	4
1244	1	4	Experiment	L	6	04Experiment	19	23.5	26.5	12	4
1260	1	4	Experiment	L	7	04Experiment	17.5	23.5	23	12	4
1276	1	4	Experiment	L	8	04Experiment	21	23.5	26	12	4
1292	1	4	Experiment	L	9	04Experiment	29	23.5	29	12	4
1308	1	4	Experiment	L	10	04Experiment	27	23.5	33	12	4
1324	1	4	Experiment	L	11	04Experiment	18	23.5	39.5	12	4
1340	1	4	Experiment	L	12	04Experiment	28.5	23.5	32.5	12	4
1356	1	4	Experiment	L	13	04Experiment	0	23.5	34	12	4
1372	1	4	Experiment	L	14	04Experiment	37.5	23.5	28.5	12	4
1388	1	4	Experiment	L	15	04Experiment	27.5	23.5	30	12	4
1404	1	4	Experiment	L	16	04Experiment	0	23.5	0	12	4
1420	1	4	Experiment	L	17	04Experiment	24	23.5	30	12	4
1436	1	4	Experiment	L	18	04Experiment	14	23.5	11.5	12	4
1452	1	4	Experiment	L	19	04Experiment	36	23.5	44	12	4
1468	1	4	Experiment	L	20	04Experiment	0	23.5	0	12	4
1484	1	4	Experiment	L	21	04Experiment	21.5	23.5	30.5	12	4
1500	1	4	Experiment	L	22	04Experiment	0	23.5	0.5	12	4
1516	1	4	Experiment	L	23	04Experiment	26	23.5	39.5	12	4
1532	1	4	Experiment	L	24	04Experiment	25.5	23.5	35.5	12	4
1165	1	4	Experiment	M	1	04Experiment	0	25.5	19	13	4
1181	1	4	Experiment	M	2	04Experiment	15	25.5	23.5	13	4
1197	1	4	Experiment	M	3	04Experiment	31.5	25.5	41.5	13	4
1213	1	4	Experiment	M	4	04Experiment	11.5	25.5	14	13	4
1229	1	4	Experiment	M	5	04Experiment	21.5	25.5	23	13	4
1245	1	4	Experiment	M	6	04Experiment	16.5	25.5	20.5	13	4
1261	1	4	Experiment	M	7	04Experiment	19	25.5	22	13	4
1277	1	4	Experiment	M	8	04Experiment	30	25.5	35.5	13	4
1293	1	4	Experiment	M	9	04Experiment	22.5	25.5	29	13	4
1309	1	4	Experiment	M	10	04Experiment	21.5	25.5	26	13	4
1325	1	4	Experiment	M	11	04Experiment	35.5	25.5	53.5	13	4
1341	1	4	Experiment	M	12	04Experiment	30.5	25.5	30	13	4
1357	1	4	Experiment	M	13	04Experiment	22	25.5	27	13	4
1373	1	4	Experiment	M	14	04Experiment	22.5	25.5	25	13	4
1389	1	4	Experiment	M	15	04Experiment	21	25.5	26	13	4
1405	1	4	Experiment	M	16	04Experiment	20	25.5	27	13	4
1421	1	4	Experiment	M	17	04Experiment	16.5	25.5	25.5	13	4
1437	1	4	Experiment	M	18	04Experiment	19.5	25.5	27.5	13	4
1453	1	4	Experiment	M	19	04Experiment	15	25.5	26.5	13	4
1469	1	4	Experiment	M	20	04Experiment	18	25.5	31.5	13	4
1485	1	4	Experiment	M	21	04Experiment	18	25.5	18.5	13	4
1501	1	4	Experiment	M	22	04Experiment	23	25.5	31.5	13	4
1517	1	4	Experiment	M	23	04Experiment	18	25.5	26	13	4
1533	1	4	Experiment	M	24	04Experiment	26	25.5	36.5	13	4
1166	1	4	Experiment	N	1	04Experiment	2.5	27.5	12	14	4
1182	1	4	Experiment	N	2	04Experiment	3	27.5	17.5	14	4
1198	1	4	Experiment	N	3	04Experiment	15	27.5	22.5	14	4
1214	1	4	Experiment	N	4	04Experiment	15.5	27.5	20.5	14	4
1230	1	4	Experiment	N	5	04Experiment	8.5	27.5	28	14	4
1246	1	4	Experiment	N	6	04Experiment	14.5	27.5	18	14	4
1262	1	4	Experiment	N	7	04Experiment	16	27.5	22	14	4
1278	1	4	Experiment	N	8	04Experiment	15.5	27.5	24.5	14	4
1294	1	4	Experiment	N	9	04Experiment	19	27.5	27.5	14	4
1310	1	4	Experiment	N	10	04Experiment	18	27.5	27	14	4
1326	1	4	Experiment	N	11	04Experiment	38.5	27.5	49.5	14	4
1342	1	4	Experiment	N	12	04Experiment	20	27.5	22.5	14	4
1358	1	4	Experiment	N	13	04Experiment	2	27.5	14	14	4
1374	1	4	Experiment	N	14	04Experiment	23	27.5	30.5	14	4
1390	1	4	Experiment	N	15	04Experiment	19.5	27.5	25.5	14	4
1406	1	4	Experiment	N	16	04Experiment	25	27.5	34	14	4
1422	1	4	Experiment	N	17	04Experiment	19	27.5	29.5	14	4
1438	1	4	Experiment	N	18	04Experiment	17	27.5	19	14	4
1454	1	4	Experiment	N	19	04Experiment	17	27.5	26.5	14	4
1470	1	4	Experiment	N	20	04Experiment	14.5	27.5	20.5	14	4
1486	1	4	Experiment	N	21	04Experiment	15.5	27.5	23.5	14	4
1502	1	4	Experiment	N	22	04Experiment	14	27.5	23.5	14	4
1518	1	4	Experiment	N	23	04Experiment	14	27.5	26	14	4
1534	1	4	Experiment	N	24	04Experiment	15.5	27.5	30.5	14	4
1167	1	4	Experiment	O	1	04Experiment	8	29.5	25	15	4
1183	1	4	Experiment	O	2	04Experiment	14.5	29.5	30	15	4
1199	1	4	Experiment	O	3	04Experiment	6.5	29.5	14.5	15	4
1215	1	4	Experiment	O	4	04Experiment	9	29.5	29	15	4
1231	1	4	Experiment	O	5	04Experiment	8	29.5	14	15	4
1247	1	4	Experiment	O	6	04Experiment	25	29.5	35.5	15	4
1263	1	4	Experiment	O	7	04Experiment	14.5	29.5	19.5	15	4
1279	1	4	Experiment	O	8	04Experiment	25.5	29.5	31.5	15	4
1295	1	4	Experiment	O	9	04Experiment	17	29.5	21	15	4
1311	1	4	Experiment	O	10	04Experiment	14	29.5	24	15	4
1327	1	4	Experiment	O	11	04Experiment	26	29.5	27.5	15	4
1343	1	4	Experiment	O	12	04Experiment	27	29.5	33.5	15	4
1359	1	4	Experiment	O	13	04Experiment	21	29.5	26.5	15	4
1375	1	4	Experiment	O	14	04Experiment	9.5	29.5	15.5	15	4
1391	1	4	Experiment	O	15	04Experiment	17	29.5	19.5	15	4
1407	1	4	Experiment	O	16	04Experiment	18	29.5	22	15	4
1423	1	4	Experiment	O	17	04Experiment	30	29.5	43	15	4
1439	1	4	Experiment	O	18	04Experiment	24	29.5	26.5	15	4
1455	1	4	Experiment	O	19	04Experiment	18	29.5	22	15	4
1471	1	4	Experiment	O	20	04Experiment	14.5	29.5	14	15	4
1487	1	4	Experiment	O	21	04Experiment	15.5	29.5	24.5	15	4
1503	1	4	Experiment	O	22	04Experiment	20.5	29.5	23	15	4
1519	1	4	Experiment	O	23	04Experiment	17	29.5	29.5	15	4
1535	1	4	Experiment	O	24	04Experiment	10	29.5	23.5	15	4
1168	1	4	Experiment	P	1	04Experiment	21.5	31.5	29	16	4
1184	1	4	Experiment	P	2	04Experiment	14	31.5	20	16	4
1200	1	4	Experiment	P	3	04Experiment	17.5	31.5	24.5	16	4
1216	1	4	Experiment	P	4	04Experiment	15	31.5	24	16	4
1232	1	4	Experiment	P	5	04Experiment	15	31.5	25.5	16	4
1248	1	4	Experiment	P	6	04Experiment	17	31.5	24.5	16	4
1264	1	4	Experiment	P	7	04Experiment	12.5	31.5	21	16	4
1280	1	4	Experiment	P	8	04Experiment	0	31.5	16	16	4
1296	1	4	Experiment	P	9	04Experiment	0	31.5	1	16	4
1312	1	4	Experiment	P	10	04Experiment	19	31.5	23	16	4
1328	1	4	Experiment	P	11	04Experiment	11.5	31.5	20	16	4
1344	1	4	Experiment	P	12	04Experiment	24	31.5	35.5	16	4
1360	1	4	Experiment	P	13	04Experiment	9	31.5	21.5	16	4
1376	1	4	Experiment	P	14	04Experiment	20	31.5	30	16	4
1392	1	4	Experiment	P	15	04Experiment	32	31.5	41	16	4
1408	1	4	Experiment	P	16	04Experiment	21	31.5	24	16	4
1424	1	4	Experiment	P	17	04Experiment	21	31.5	28.5	16	4
1440	1	4	Experiment	P	18	04Experiment	20	31.5	28.5	16	4
1456	1	4	Experiment	P	19	04Experiment	18.5	31.5	19.5	16	4
1472	1	4	Experiment	P	20	04Experiment	29	31.5	35	16	4
1488	1	4	Experiment	P	21	04Experiment	32	31.5	46	16	4
1504	1	4	Experiment	P	22	04Experiment	16	31.5	19	16	4
1520	1	4	Experiment	P	23	04Experiment	9.5	31.5	24	16	4
1536	1	4	Experiment	P	24	04Experiment	17.5	31.5	21.5	16	4
1921	1	6	Experiment	A	1	06Experiment	97	1.5	50	1	6
1937	1	6	Experiment	A	2	06Experiment	86	1.5	32	1	6
1953	1	6	Experiment	A	3	06Experiment	92.5	1.5	37.5	1	6
1969	1	6	Experiment	A	4	06Experiment	98.5	1.5	35.5	1	6
1985	1	6	Experiment	A	5	06Experiment	134.5	1.5	69.5	1	6
2001	1	6	Experiment	A	6	06Experiment	108.5	1.5	45	1	6
2017	1	6	Experiment	A	7	06Experiment	118	1.5	57	1	6
2033	1	6	Experiment	A	8	06Experiment	99	1.5	31	1	6
2049	1	6	Experiment	A	9	06Experiment	60	1.5	25.5	1	6
2065	1	6	Experiment	A	10	06Experiment	117	1.5	55	1	6
2081	1	6	Experiment	A	11	06Experiment	106.5	1.5	48.5	1	6
2097	1	6	Experiment	A	12	06Experiment	138	1.5	73.5	1	6
2113	1	6	Experiment	A	13	06Experiment	114.5	1.5	49	1	6
2129	1	6	Experiment	A	14	06Experiment	117	1.5	52.5	1	6
2145	1	6	Experiment	A	15	06Experiment	115	1.5	49	1	6
2161	1	6	Experiment	A	16	06Experiment	79	1.5	54.5	1	6
2177	1	6	Experiment	A	17	06Experiment	123.5	1.5	61	1	6
2193	1	6	Experiment	A	18	06Experiment	139	1.5	85.5	1	6
2209	1	6	Experiment	A	19	06Experiment	122	1.5	50	1	6
2225	1	6	Experiment	A	20	06Experiment	114	1.5	44.5	1	6
2241	1	6	Experiment	A	21	06Experiment	106	1.5	31.5	1	6
2257	1	6	Experiment	A	22	06Experiment	132	1.5	49.5	1	6
2273	1	6	Experiment	A	23	06Experiment	109	1.5	46	1	6
2289	1	6	Experiment	A	24	06Experiment	49	1.5	65.5	1	6	X
1922	1	6	Experiment	B	1	06Experiment	88	3.5	42	2	6
1938	1	6	Experiment	B	2	06Experiment	73.5	3.5	31	2	6
1954	1	6	Experiment	B	3	06Experiment	85.5	3.5	39.5	2	6
1970	1	6	Experiment	B	4	06Experiment	99.5	3.5	45	2	6
1986	1	6	Experiment	B	5	06Experiment	86.5	3.5	44	2	6
2002	1	6	Experiment	B	6	06Experiment	93.5	3.5	45.5	2	6
2018	1	6	Experiment	B	7	06Experiment	99	3.5	55	2	6
2034	1	6	Experiment	B	8	06Experiment	109.5	3.5	48	2	6
2050	1	6	Experiment	B	9	06Experiment	58	3.5	17.5	2	6
2066	1	6	Experiment	B	10	06Experiment	112.5	3.5	48	2	6
2082	1	6	Experiment	B	11	06Experiment	108.5	3.5	55	2	6
2098	1	6	Experiment	B	12	06Experiment	105	3.5	50	2	6
2114	1	6	Experiment	B	13	06Experiment	133	3.5	61	2	6
2130	1	6	Experiment	B	14	06Experiment	105.5	3.5	50.5	2	6
2146	1	6	Experiment	B	15	06Experiment	109	3.5	54	2	6
2162	1	6	Experiment	B	16	06Experiment	112	3.5	51.5	2	6
2178	1	6	Experiment	B	17	06Experiment	75	3.5	40.5	2	6
2194	1	6	Experiment	B	18	06Experiment	112.5	3.5	52	2	6
2210	1	6	Experiment	B	19	06Experiment	125.5	3.5	57.5	2	6
2226	1	6	Experiment	B	20	06Experiment	113.5	3.5	53	2	6
2242	1	6	Experiment	B	21	06Experiment	116	3.5	58	2	6
2258	1	6	Experiment	B	22	06Experiment	119	3.5	50.5	2	6
2274	1	6	Experiment	B	23	06Experiment	113.5	3.5	55.5	2	6
2290	1	6	Experiment	B	24	06Experiment	77.5	3.5	44.5	2	6	X
1923	1	6	Experiment	C	1	06Experiment	83.5	5.5	32	3	6
1939	1	6	Experiment	C	2	06Experiment	84	5.5	34.5	3	6
1955	1	6	Experiment	C	3	06Experiment	86	5.5	38	3	6
1971	1	6	Experiment	C	4	06Experiment	41.5	5.5	19	3	6
1987	1	6	Experiment	C	5	06Experiment	99.5	5.5	75.5	3	6
2003	1	6	Experiment	C	6	06Experiment	131	5.5	48	3	6
2019	1	6	Experiment	C	7	06Experiment	73	5.5	22.5	3	6
2035	1	6	Experiment	C	8	06Experiment	58	5.5	27	3	6
2051	1	6	Experiment	C	9	06Experiment	85.5	5.5	52	3	6
2067	1	6	Experiment	C	10	06Experiment	107	5.5	43	3	6
2083	1	6	Experiment	C	11	06Experiment	122	5.5	45.5	3	6
2099	1	6	Experiment	C	12	06Experiment	125	5.5	87	3	6
2115	1	6	Experiment	C	13	06Experiment	116	5.5	46.5	3	6
2131	1	6	Experiment	C	14	06Experiment	110	5.5	40	3	6
2147	1	6	Experiment	C	15	06Experiment	66.5	5.5	32	3	6
2163	1	6	Experiment	C	16	06Experiment	110	5.5	47.5	3	6
2179	1	6	Experiment	C	17	06Experiment	99	5.5	47.5	3	6
2195	1	6	Experiment	C	18	06Experiment	108	5.5	49	3	6
2211	1	6	Experiment	C	19	06Experiment	97.5	5.5	67	3	6
2227	1	6	Experiment	C	20	06Experiment	107	5.5	47.5	3	6
2243	1	6	Experiment	C	21	06Experiment	105	5.5	43	3	6
2259	1	6	Experiment	C	22	06Experiment	127	5.5	52	3	6
2275	1	6	Experiment	C	23	06Experiment	67	5.5	34	3	6
2291	1	6	Experiment	C	24	06Experiment	9	5.5	42	3	6	X
1924	1	6	Experiment	D	1	06Experiment	89.5	7.5	38.5	4	6
1940	1	6	Experiment	D	2	06Experiment	91	7.5	39	4	6
1956	1	6	Experiment	D	3	06Experiment	89.5	7.5	39.5	4	6
1972	1	6	Experiment	D	4	06Experiment	103	7.5	35	4	6
1988	1	6	Experiment	D	5	06Experiment	82.5	7.5	31	4	6
2004	1	6	Experiment	D	6	06Experiment	62.5	7.5	24	4	6
2020	1	6	Experiment	D	7	06Experiment	108.5	7.5	46	4	6
2036	1	6	Experiment	D	8	06Experiment	87	7.5	37.5	4	6
2052	1	6	Experiment	D	9	06Experiment	40.5	7.5	14.5	4	6
2068	1	6	Experiment	D	10	06Experiment	97	7.5	45	4	6
2084	1	6	Experiment	D	11	06Experiment	108.5	7.5	49	4	6
2100	1	6	Experiment	D	12	06Experiment	112	7.5	52	4	6
2116	1	6	Experiment	D	13	06Experiment	59.5	7.5	38.5	4	6
2132	1	6	Experiment	D	14	06Experiment	109.5	7.5	47	4	6
2148	1	6	Experiment	D	15	06Experiment	99.5	7.5	45	4	6
2164	1	6	Experiment	D	16	06Experiment	109.5	7.5	46.5	4	6
2180	1	6	Experiment	D	17	06Experiment	106.5	7.5	45.5	4	6
2196	1	6	Experiment	D	18	06Experiment	71.5	7.5	36.5	4	6
2212	1	6	Experiment	D	19	06Experiment	123	7.5	45	4	6
2228	1	6	Experiment	D	20	06Experiment	106	7.5	44.5	4	6
2244	1	6	Experiment	D	21	06Experiment	46.5	7.5	35.5	4	6
2260	1	6	Experiment	D	22	06Experiment	103	7.5	70	4	6
2276	1	6	Experiment	D	23	06Experiment	118	7.5	52.5	4	6
2292	1	6	Experiment	D	24	06Experiment	101	7.5	44.5	4	6
1925	1	6	Experiment	E	1	06Experiment	93	9.5	33.5	5	6
1941	1	6	Experiment	E	2	06Experiment	84.5	9.5	32.5	5	6
1957	1	6	Experiment	E	3	06Experiment	107.5	9.5	54.5	5	6
1973	1	6	Experiment	E	4	06Experiment	102	9.5	34	5	6
1989	1	6	Experiment	E	5	06Experiment	62	9.5	49	5	6
2005	1	6	Experiment	E	6	06Experiment	103.5	9.5	53.5	5	6
2021	1	6	Experiment	E	7	06Experiment	100	9.5	35	5	6
2037	1	6	Experiment	E	8	06Experiment	84	9.5	23	5	6
2053	1	6	Experiment	E	9	06Experiment	71.5	9.5	25	5	6
2069	1	6	Experiment	E	10	06Experiment	101.5	9.5	46	5	6
2085	1	6	Experiment	E	11	06Experiment	99	9.5	61.5	5	6
2101	1	6	Experiment	E	12	06Experiment	109	9.5	48	5	6
2117	1	6	Experiment	E	13	06Experiment	94.5	9.5	45.5	5	6
2133	1	6	Experiment	E	14	06Experiment	103	9.5	45	5	6
2149	1	6	Experiment	E	15	06Experiment	74.5	9.5	23.5	5	6
2165	1	6	Experiment	E	16	06Experiment	127	9.5	47.5	5	6
2181	1	6	Experiment	E	17	06Experiment	89	9.5	50.5	5	6
2197	1	6	Experiment	E	18	06Experiment	106	9.5	42	5	6
2213	1	6	Experiment	E	19	06Experiment	105	9.5	39.5	5	6
2229	1	6	Experiment	E	20	06Experiment	90	9.5	41	5	6
2245	1	6	Experiment	E	21	06Experiment	93.5	9.5	36.5	5	6
2261	1	6	Experiment	E	22	06Experiment	97	9.5	43.5	5	6
2277	1	6	Experiment	E	23	06Experiment	140	9.5	61.5	5	6
2293	1	6	Experiment	E	24	06Experiment	0	9.5	62	5	6	X
1926	1	6	Experiment	F	1	06Experiment	72.5	11.5	33.5	6	6
1942	1	6	Experiment	F	2	06Experiment	81.5	11.5	31.5	6	6
1958	1	6	Experiment	F	3	06Experiment	86.5	11.5	29.5	6	6
1974	1	6	Experiment	F	4	06Experiment	91.5	11.5	31.5	6	6
1990	1	6	Experiment	F	5	06Experiment	102	11.5	35.5	6	6
2006	1	6	Experiment	F	6	06Experiment	98	11.5	32.5	6	6
2022	1	6	Experiment	F	7	06Experiment	104	11.5	34.5	6	6
2038	1	6	Experiment	F	8	06Experiment	57.5	11.5	35	6	6
2054	1	6	Experiment	F	9	06Experiment	1	11.5	0	6	6
2070	1	6	Experiment	F	10	06Experiment	25.5	11.5	10.5	6	6
2086	1	6	Experiment	F	11	06Experiment	103	11.5	46.5	6	6
2102	1	6	Experiment	F	12	06Experiment	100	11.5	40.5	6	6
2118	1	6	Experiment	F	13	06Experiment	91	11.5	78	6	6
2134	1	6	Experiment	F	14	06Experiment	103.5	11.5	40.5	6	6
2150	1	6	Experiment	F	15	06Experiment	103	11.5	37	6	6
2166	1	6	Experiment	F	16	06Experiment	102	11.5	38.5	6	6
2182	1	6	Experiment	F	17	06Experiment	91.5	11.5	30.5	6	6
2198	1	6	Experiment	F	18	06Experiment	105	11.5	37	6	6
2214	1	6	Experiment	F	19	06Experiment	111	11.5	43.5	6	6
2230	1	6	Experiment	F	20	06Experiment	107.5	11.5	39.5	6	6
2246	1	6	Experiment	F	21	06Experiment	106.5	11.5	46.5	6	6
2262	1	6	Experiment	F	22	06Experiment	127.5	11.5	61	6	6
2278	1	6	Experiment	F	23	06Experiment	125.5	11.5	48	6	6
2294	1	6	Experiment	F	24	06Experiment	98	11.5	37.5	6	6
1927	1	6	Experiment	G	1	06Experiment	92.5	13.5	62	7	6
1943	1	6	Experiment	G	2	06Experiment	72	13.5	27	7	6
1959	1	6	Experiment	G	3	06Experiment	73.5	13.5	26	7	6
1975	1	6	Experiment	G	4	06Experiment	87.5	13.5	29.5	7	6
1991	1	6	Experiment	G	5	06Experiment	82	13.5	33.5	7	6
2007	1	6	Experiment	G	6	06Experiment	82.5	13.5	30	7	6
2023	1	6	Experiment	G	7	06Experiment	94	13.5	37.5	7	6
2039	1	6	Experiment	G	8	06Experiment	105	13.5	37	7	6
2055	1	6	Experiment	G	9	06Experiment	68.5	13.5	28.5	7	6
2071	1	6	Experiment	G	10	06Experiment	98	13.5	32.5	7	6
2087	1	6	Experiment	G	11	06Experiment	56	13.5	16	7	6
2103	1	6	Experiment	G	12	06Experiment	98	13.5	38	7	6
2119	1	6	Experiment	G	13	06Experiment	91	13.5	36	7	6
2135	1	6	Experiment	G	14	06Experiment	83.5	13.5	39	7	6
2151	1	6	Experiment	G	15	06Experiment	97	13.5	38	7	6
2167	1	6	Experiment	G	16	06Experiment	97.5	13.5	35.5	7	6
2183	1	6	Experiment	G	17	06Experiment	101	13.5	35	7	6
2199	1	6	Experiment	G	18	06Experiment	99.5	13.5	40	7	6
2215	1	6	Experiment	G	19	06Experiment	104.5	13.5	40.5	7	6
2231	1	6	Experiment	G	20	06Experiment	109.5	13.5	39.5	7	6
2247	1	6	Experiment	G	21	06Experiment	101	13.5	37	7	6
2263	1	6	Experiment	G	22	06Experiment	103	13.5	38	7	6
2279	1	6	Experiment	G	23	06Experiment	107	13.5	64	7	6
2295	1	6	Experiment	G	24	06Experiment	90.5	13.5	27	7	6
1928	1	6	Experiment	H	1	06Experiment	91.5	15.5	33.5	8	6
1944	1	6	Experiment	H	2	06Experiment	68	15.5	29.5	8	6
1960	1	6	Experiment	H	3	06Experiment	69.5	15.5	27.5	8	6
1976	1	6	Experiment	H	4	06Experiment	74.5	15.5	31	8	6
1992	1	6	Experiment	H	5	06Experiment	70	15.5	30.5	8	6
2008	1	6	Experiment	H	6	06Experiment	86.5	15.5	31	8	6
2024	1	6	Experiment	H	7	06Experiment	88	15.5	34	8	6
2040	1	6	Experiment	H	8	06Experiment	90	15.5	38.5	8	6
2056	1	6	Experiment	H	9	06Experiment	83	15.5	36	8	6
2072	1	6	Experiment	H	10	06Experiment	95	15.5	38	8	6
2088	1	6	Experiment	H	11	06Experiment	103	15.5	40	8	6
2104	1	6	Experiment	H	12	06Experiment	92.5	15.5	37	8	6
2120	1	6	Experiment	H	13	06Experiment	87	15.5	40	8	6
2136	1	6	Experiment	H	14	06Experiment	92.5	15.5	36.5	8	6
2152	1	6	Experiment	H	15	06Experiment	52	15.5	22.5	8	6
2168	1	6	Experiment	H	16	06Experiment	93	15.5	36	8	6
2184	1	6	Experiment	H	17	06Experiment	88.5	15.5	38	8	6
2200	1	6	Experiment	H	18	06Experiment	84	15.5	31	8	6
2216	1	6	Experiment	H	19	06Experiment	102	15.5	36.5	8	6
2232	1	6	Experiment	H	20	06Experiment	97	15.5	39.5	8	6
2248	1	6	Experiment	H	21	06Experiment	78	15.5	57.5	8	6
2264	1	6	Experiment	H	22	06Experiment	72	15.5	32	8	6
2280	1	6	Experiment	H	23	06Experiment	80.5	15.5	26.5	8	6
2296	1	6	Experiment	H	24	06Experiment	70	15.5	22	8	6
1929	1	6	Experiment	I	1	06Experiment	69.5	17.5	25	9	6
1945	1	6	Experiment	I	2	06Experiment	49	17.5	25.5	9	6
1961	1	6	Experiment	I	3	06Experiment	54.5	17.5	21	9	6
1977	1	6	Experiment	I	4	06Experiment	67	17.5	27.5	9	6
1993	1	6	Experiment	I	5	06Experiment	56	17.5	15.5	9	6
2009	1	6	Experiment	I	6	06Experiment	61	17.5	27	9	6
2025	1	6	Experiment	I	7	06Experiment	78.5	17.5	37.5	9	6
2041	1	6	Experiment	I	8	06Experiment	74.5	17.5	33.5	9	6
2057	1	6	Experiment	I	9	06Experiment	83	17.5	44	9	6
2073	1	6	Experiment	I	10	06Experiment	73	17.5	37	9	6
2089	1	6	Experiment	I	11	06Experiment	77.5	17.5	35	9	6
2105	1	6	Experiment	I	12	06Experiment	71.5	17.5	30.5	9	6
2121	1	6	Experiment	I	13	06Experiment	99	17.5	37.5	9	6
2137	1	6	Experiment	I	14	06Experiment	90.5	17.5	31.5	9	6
2153	1	6	Experiment	I	15	06Experiment	34.5	17.5	17.5	9	6
2169	1	6	Experiment	I	16	06Experiment	64.5	17.5	37	9	6
2185	1	6	Experiment	I	17	06Experiment	71	17.5	30.5	9	6
2201	1	6	Experiment	I	18	06Experiment	71.5	17.5	27	9	6
2217	1	6	Experiment	I	19	06Experiment	71	17.5	52.5	9	6
2233	1	6	Experiment	I	20	06Experiment	60	17.5	27	9	6
2249	1	6	Experiment	I	21	06Experiment	35.5	17.5	32	9	6
2265	1	6	Experiment	I	22	06Experiment	64	17.5	23	9	6
2281	1	6	Experiment	I	23	06Experiment	26	17.5	12	9	6
2297	1	6	Experiment	I	24	06Experiment	72.5	17.5	24	9	6
1930	1	6	Experiment	J	1	06Experiment	65.5	19.5	26.5	10	6
1946	1	6	Experiment	J	2	06Experiment	56	19.5	26.5	10	6
1962	1	6	Experiment	J	3	06Experiment	70	19.5	34	10	6
1978	1	6	Experiment	J	4	06Experiment	55.5	19.5	24	10	6
1994	1	6	Experiment	J	5	06Experiment	50.5	19.5	25.5	10	6
2010	1	6	Experiment	J	6	06Experiment	56.5	19.5	26	10	6
2026	1	6	Experiment	J	7	06Experiment	77.5	19.5	41	10	6
2042	1	6	Experiment	J	8	06Experiment	52	19.5	33	10	6
2058	1	6	Experiment	J	9	06Experiment	59	19.5	33	10	6
2074	1	6	Experiment	J	10	06Experiment	61	19.5	25	10	6
2090	1	6	Experiment	J	11	06Experiment	70	19.5	28.5	10	6
2106	1	6	Experiment	J	12	06Experiment	57.5	19.5	31.5	10	6
2122	1	6	Experiment	J	13	06Experiment	62.5	19.5	29	10	6
2138	1	6	Experiment	J	14	06Experiment	64	19.5	35.5	10	6
2154	1	6	Experiment	J	15	06Experiment	63	19.5	31.5	10	6
2170	1	6	Experiment	J	16	06Experiment	60.5	19.5	28.5	10	6
2186	1	6	Experiment	J	17	06Experiment	63.5	19.5	33	10	6
2202	1	6	Experiment	J	18	06Experiment	63.5	19.5	34.5	10	6
2218	1	6	Experiment	J	19	06Experiment	79.5	19.5	49	10	6
2234	1	6	Experiment	J	20	06Experiment	51	19.5	25.5	10	6
2250	1	6	Experiment	J	21	06Experiment	42.5	19.5	38.5	10	6
2266	1	6	Experiment	J	22	06Experiment	55	19.5	23	10	6
2282	1	6	Experiment	J	23	06Experiment	57.5	19.5	28	10	6
2298	1	6	Experiment	J	24	06Experiment	56	19.5	16	10	6
1931	1	6	Experiment	K	1	06Experiment	55.5	21.5	24.5	11	6
1947	1	6	Experiment	K	2	06Experiment	49.5	21.5	19.5	11	6
1963	1	6	Experiment	K	3	06Experiment	41	21.5	19	11	6
1979	1	6	Experiment	K	4	06Experiment	41.5	21.5	20.5	11	6
1995	1	6	Experiment	K	5	06Experiment	50	21.5	20	11	6
2011	1	6	Experiment	K	6	06Experiment	53	21.5	31.5	11	6
2027	1	6	Experiment	K	7	06Experiment	51.5	21.5	22.5	11	6
2043	1	6	Experiment	K	8	06Experiment	45.5	21.5	31.5	11	6
2059	1	6	Experiment	K	9	06Experiment	61.5	21.5	34	11	6
2075	1	6	Experiment	K	10	06Experiment	55.5	21.5	36	11	6
2091	1	6	Experiment	K	11	06Experiment	59.5	21.5	34	11	6
2107	1	6	Experiment	K	12	06Experiment	54.5	21.5	37.5	11	6
2123	1	6	Experiment	K	13	06Experiment	47.5	21.5	21.5	11	6
2139	1	6	Experiment	K	14	06Experiment	66	21.5	28	11	6
2155	1	6	Experiment	K	15	06Experiment	11	21.5	1	11	6
2171	1	6	Experiment	K	16	06Experiment	66	21.5	32	11	6
2187	1	6	Experiment	K	17	06Experiment	27.5	21.5	17.5	11	6
2203	1	6	Experiment	K	18	06Experiment	52.5	21.5	32	11	6
2219	1	6	Experiment	K	19	06Experiment	51	21.5	41.5	11	6
2235	1	6	Experiment	K	20	06Experiment	64	21.5	37.5	11	6
2251	1	6	Experiment	K	21	06Experiment	42	21.5	19	11	6
2267	1	6	Experiment	K	22	06Experiment	75	21.5	31	11	6
2283	1	6	Experiment	K	23	06Experiment	55	21.5	21.5	11	6
2299	1	6	Experiment	K	24	06Experiment	58	21.5	37.5	11	6
1932	1	6	Experiment	L	1	06Experiment	54	23.5	26.5	12	6
1948	1	6	Experiment	L	2	06Experiment	42	23.5	24	12	6
1964	1	6	Experiment	L	3	06Experiment	30	23.5	24.5	12	6
1980	1	6	Experiment	L	4	06Experiment	31	23.5	21.5	12	6
1996	1	6	Experiment	L	5	06Experiment	43	23.5	18	12	6
2012	1	6	Experiment	L	6	06Experiment	44.5	23.5	26.5	12	6
2028	1	6	Experiment	L	7	06Experiment	36.5	23.5	23	12	6
2044	1	6	Experiment	L	8	06Experiment	41.5	23.5	26	12	6
2060	1	6	Experiment	L	9	06Experiment	53.5	23.5	29	12	6
2076	1	6	Experiment	L	10	06Experiment	59.5	23.5	33	12	6
2092	1	6	Experiment	L	11	06Experiment	51	23.5	39.5	12	6
2108	1	6	Experiment	L	12	06Experiment	61	23.5	32.5	12	6
2124	1	6	Experiment	L	13	06Experiment	51.5	23.5	34	12	6
2140	1	6	Experiment	L	14	06Experiment	62	23.5	28.5	12	6
2156	1	6	Experiment	L	15	06Experiment	60.5	23.5	30	12	6
2172	1	6	Experiment	L	16	06Experiment	0	23.5	0	12	6
2188	1	6	Experiment	L	17	06Experiment	56	23.5	30	12	6
2204	1	6	Experiment	L	18	06Experiment	31.5	23.5	11.5	12	6
2220	1	6	Experiment	L	19	06Experiment	71.5	23.5	44	12	6
2236	1	6	Experiment	L	20	06Experiment	0	23.5	0	12	6
2252	1	6	Experiment	L	21	06Experiment	58.5	23.5	30.5	12	6
2268	1	6	Experiment	L	22	06Experiment	6	23.5	0.5	12	6
2284	1	6	Experiment	L	23	06Experiment	65	23.5	39.5	12	6
2300	1	6	Experiment	L	24	06Experiment	74	23.5	35.5	12	6
1933	1	6	Experiment	M	1	06Experiment	36	25.5	19	13	6
1949	1	6	Experiment	M	2	06Experiment	38.5	25.5	23.5	13	6
1965	1	6	Experiment	M	3	06Experiment	63	25.5	41.5	13	6
1981	1	6	Experiment	M	4	06Experiment	26.5	25.5	14	13	6
1997	1	6	Experiment	M	5	06Experiment	33.5	25.5	23	13	6
2013	1	6	Experiment	M	6	06Experiment	27.5	25.5	20.5	13	6
2029	1	6	Experiment	M	7	06Experiment	29	25.5	22	13	6
2045	1	6	Experiment	M	8	06Experiment	53.5	25.5	35.5	13	6
2061	1	6	Experiment	M	9	06Experiment	34.5	25.5	29	13	6
2077	1	6	Experiment	M	10	06Experiment	44	25.5	26	13	6
2093	1	6	Experiment	M	11	06Experiment	64	25.5	53.5	13	6
2109	1	6	Experiment	M	12	06Experiment	61.5	25.5	30	13	6
2125	1	6	Experiment	M	13	06Experiment	44.5	25.5	27	13	6
2141	1	6	Experiment	M	14	06Experiment	41	25.5	25	13	6
2157	1	6	Experiment	M	15	06Experiment	37.5	25.5	26	13	6
2173	1	6	Experiment	M	16	06Experiment	40.5	25.5	27	13	6
2189	1	6	Experiment	M	17	06Experiment	45	25.5	25.5	13	6
2205	1	6	Experiment	M	18	06Experiment	51.5	25.5	27.5	13	6
2221	1	6	Experiment	M	19	06Experiment	40	25.5	26.5	13	6
2237	1	6	Experiment	M	20	06Experiment	42	25.5	31.5	13	6
2253	1	6	Experiment	M	21	06Experiment	43	25.5	18.5	13	6
2269	1	6	Experiment	M	22	06Experiment	45	25.5	31.5	13	6
2285	1	6	Experiment	M	23	06Experiment	49	25.5	26	13	6
2301	1	6	Experiment	M	24	06Experiment	66.5	25.5	36.5	13	6
1934	1	6	Experiment	N	1	06Experiment	39	27.5	12	14	6
1950	1	6	Experiment	N	2	06Experiment	26.5	27.5	17.5	14	6
1966	1	6	Experiment	N	3	06Experiment	28.5	27.5	22.5	14	6
1982	1	6	Experiment	N	4	06Experiment	27	27.5	20.5	14	6
1998	1	6	Experiment	N	5	06Experiment	36.5	27.5	28	14	6
2014	1	6	Experiment	N	6	06Experiment	27	27.5	18	14	6
2030	1	6	Experiment	N	7	06Experiment	23.5	27.5	22	14	6
2046	1	6	Experiment	N	8	06Experiment	22.5	27.5	24.5	14	6
2062	1	6	Experiment	N	9	06Experiment	44	27.5	27.5	14	6
2078	1	6	Experiment	N	10	06Experiment	33.5	27.5	27	14	6
2094	1	6	Experiment	N	11	06Experiment	63.5	27.5	49.5	14	6
2110	1	6	Experiment	N	12	06Experiment	45	27.5	22.5	14	6
2126	1	6	Experiment	N	13	06Experiment	27	27.5	14	14	6
2142	1	6	Experiment	N	14	06Experiment	43	27.5	30.5	14	6
2158	1	6	Experiment	N	15	06Experiment	32	27.5	25.5	14	6
2174	1	6	Experiment	N	16	06Experiment	38.5	27.5	34	14	6
2190	1	6	Experiment	N	17	06Experiment	37	27.5	29.5	14	6
2206	1	6	Experiment	N	18	06Experiment	37	27.5	19	14	6
2222	1	6	Experiment	N	19	06Experiment	30.5	27.5	26.5	14	6
2238	1	6	Experiment	N	20	06Experiment	33	27.5	20.5	14	6
2254	1	6	Experiment	N	21	06Experiment	24	27.5	23.5	14	6
2270	1	6	Experiment	N	22	06Experiment	23.5	27.5	23.5	14	6
2286	1	6	Experiment	N	23	06Experiment	29	27.5	26	14	6
2302	1	6	Experiment	N	24	06Experiment	53	27.5	30.5	14	6
1935	1	6	Experiment	O	1	06Experiment	33	29.5	25	15	6
1951	1	6	Experiment	O	2	06Experiment	38.5	29.5	30	15	6
1967	1	6	Experiment	O	3	06Experiment	17	29.5	14.5	15	6
1983	1	6	Experiment	O	4	06Experiment	52.5	29.5	29	15	6
1999	1	6	Experiment	O	5	06Experiment	24	29.5	14	15	6
2015	1	6	Experiment	O	6	06Experiment	44	29.5	35.5	15	6
2031	1	6	Experiment	O	7	06Experiment	32	29.5	19.5	15	6
2047	1	6	Experiment	O	8	06Experiment	53.5	29.5	31.5	15	6
2063	1	6	Experiment	O	9	06Experiment	32	29.5	21	15	6
2079	1	6	Experiment	O	10	06Experiment	27	29.5	24	15	6
2095	1	6	Experiment	O	11	06Experiment	40	29.5	27.5	15	6
2111	1	6	Experiment	O	12	06Experiment	52.5	29.5	33.5	15	6
2127	1	6	Experiment	O	13	06Experiment	41.5	29.5	26.5	15	6
2143	1	6	Experiment	O	14	06Experiment	43	29.5	15.5	15	6
2159	1	6	Experiment	O	15	06Experiment	30	29.5	19.5	15	6
2175	1	6	Experiment	O	16	06Experiment	29	29.5	22	15	6
2191	1	6	Experiment	O	17	06Experiment	52	29.5	43	15	6
2207	1	6	Experiment	O	18	06Experiment	48	29.5	26.5	15	6
2223	1	6	Experiment	O	19	06Experiment	48.5	29.5	22	15	6
2239	1	6	Experiment	O	20	06Experiment	36	29.5	14	15	6
2255	1	6	Experiment	O	21	06Experiment	25.5	29.5	24.5	15	6
2271	1	6	Experiment	O	22	06Experiment	31	29.5	23	15	6
2287	1	6	Experiment	O	23	06Experiment	35.5	29.5	29.5	15	6
2303	1	6	Experiment	O	24	06Experiment	38.5	29.5	23.5	15	6
1936	1	6	Experiment	P	1	06Experiment	62	31.5	29	16	6
1952	1	6	Experiment	P	2	06Experiment	46	31.5	20	16	6
1968	1	6	Experiment	P	3	06Experiment	44	31.5	24.5	16	6
1984	1	6	Experiment	P	4	06Experiment	47.5	31.5	24	16	6
2000	1	6	Experiment	P	5	06Experiment	48	31.5	25.5	16	6
2016	1	6	Experiment	P	6	06Experiment	45	31.5	24.5	16	6
2032	1	6	Experiment	P	7	06Experiment	39	31.5	21	16	6
2048	1	6	Experiment	P	8	06Experiment	41	31.5	16	16	6
2064	1	6	Experiment	P	9	06Experiment	28	31.5	1	16	6
2080	1	6	Experiment	P	10	06Experiment	54	31.5	23	16	6
2096	1	6	Experiment	P	11	06Experiment	39	31.5	20	16	6
2112	1	6	Experiment	P	12	06Experiment	62.5	31.5	35.5	16	6
2128	1	6	Experiment	P	13	06Experiment	17.5	31.5	21.5	16	6
2144	1	6	Experiment	P	14	06Experiment	54	31.5	30	16	6
2160	1	6	Experiment	P	15	06Experiment	67	31.5	41	16	6
2176	1	6	Experiment	P	16	06Experiment	53	31.5	24	16	6
2192	1	6	Experiment	P	17	06Experiment	59.5	31.5	28.5	16	6
2208	1	6	Experiment	P	18	06Experiment	52	31.5	28.5	16	6
2224	1	6	Experiment	P	19	06Experiment	48.5	31.5	19.5	16	6
2240	1	6	Experiment	P	20	06Experiment	57.5	31.5	35	16	6
2256	1	6	Experiment	P	21	06Experiment	68.5	31.5	46	16	6
2272	1	6	Experiment	P	22	06Experiment	44	31.5	19	16	6
2288	1	6	Experiment	P	23	06Experiment	38	31.5	24	16	6
2304	1	6	Experiment	P	24	06Experiment	67	31.5	21.5	16	6
2305	1	7	Experiment	A	1	07Experiment	54.5	1.5	50	1	7
2321	1	7	Experiment	A	2	07Experiment	50	1.5	32	1	7
2337	1	7	Experiment	A	3	07Experiment	49.5	1.5	37.5	1	7
2353	1	7	Experiment	A	4	07Experiment	56.5	1.5	35.5	1	7
2369	1	7	Experiment	A	5	07Experiment	75	1.5	69.5	1	7
2385	1	7	Experiment	A	6	07Experiment	61.5	1.5	45	1	7
2401	1	7	Experiment	A	7	07Experiment	57.5	1.5	57	1	7
2417	1	7	Experiment	A	8	07Experiment	40.5	1.5	31	1	7
2433	1	7	Experiment	A	9	07Experiment	42	1.5	25.5	1	7
2449	1	7	Experiment	A	10	07Experiment	50.5	1.5	55	1	7
2465	1	7	Experiment	A	11	07Experiment	45	1.5	48.5	1	7
2481	1	7	Experiment	A	12	07Experiment	63.5	1.5	73.5	1	7
2497	1	7	Experiment	A	13	07Experiment	41	1.5	49	1	7
2513	1	7	Experiment	A	14	07Experiment	41	1.5	52.5	1	7
2529	1	7	Experiment	A	15	07Experiment	42.5	1.5	49	1	7
2545	1	7	Experiment	A	16	07Experiment	34	1.5	54.5	1	7
2561	1	7	Experiment	A	17	07Experiment	47	1.5	61	1	7
2577	1	7	Experiment	A	18	07Experiment	40	1.5	85.5	1	7
2593	1	7	Experiment	A	19	07Experiment	43	1.5	50	1	7
2609	1	7	Experiment	A	20	07Experiment	39	1.5	44.5	1	7
2625	1	7	Experiment	A	21	07Experiment	39	1.5	31.5	1	7
2641	1	7	Experiment	A	22	07Experiment	53	1.5	49.5	1	7
2657	1	7	Experiment	A	23	07Experiment	22	1.5	46	1	7
2673	1	7	Experiment	A	24	07Experiment	16	1.5	65.5	1	7	X
2306	1	7	Experiment	B	1	07Experiment	49	3.5	42	2	7
2322	1	7	Experiment	B	2	07Experiment	41.5	3.5	31	2	7
2338	1	7	Experiment	B	3	07Experiment	52	3.5	39.5	2	7
2354	1	7	Experiment	B	4	07Experiment	61.5	3.5	45	2	7
2370	1	7	Experiment	B	5	07Experiment	49	3.5	44	2	7
2386	1	7	Experiment	B	6	07Experiment	32.5	3.5	45.5	2	7
2402	1	7	Experiment	B	7	07Experiment	45	3.5	55	2	7
2418	1	7	Experiment	B	8	07Experiment	52.5	3.5	48	2	7
2434	1	7	Experiment	B	9	07Experiment	19	3.5	17.5	2	7
2450	1	7	Experiment	B	10	07Experiment	49.5	3.5	48	2	7
2466	1	7	Experiment	B	11	07Experiment	44.5	3.5	55	2	7
2482	1	7	Experiment	B	12	07Experiment	42.5	3.5	50	2	7
2498	1	7	Experiment	B	13	07Experiment	52.5	3.5	61	2	7
2514	1	7	Experiment	B	14	07Experiment	37.5	3.5	50.5	2	7
2530	1	7	Experiment	B	15	07Experiment	39	3.5	54	2	7
2546	1	7	Experiment	B	16	07Experiment	40	3.5	51.5	2	7
2562	1	7	Experiment	B	17	07Experiment	30.5	3.5	40.5	2	7
2578	1	7	Experiment	B	18	07Experiment	33.5	3.5	52	2	7
2594	1	7	Experiment	B	19	07Experiment	39	3.5	57.5	2	7
2610	1	7	Experiment	B	20	07Experiment	34	3.5	53	2	7
2626	1	7	Experiment	B	21	07Experiment	45.5	3.5	58	2	7
2642	1	7	Experiment	B	22	07Experiment	46	3.5	50.5	2	7
2658	1	7	Experiment	B	23	07Experiment	35	3.5	55.5	2	7
2674	1	7	Experiment	B	24	07Experiment	17	3.5	44.5	2	7	X
2307	1	7	Experiment	C	1	07Experiment	50.5	5.5	32	3	7
2323	1	7	Experiment	C	2	07Experiment	50.5	5.5	34.5	3	7
2339	1	7	Experiment	C	3	07Experiment	50	5.5	38	3	7
2355	1	7	Experiment	C	4	07Experiment	38.5	5.5	19	3	7
2371	1	7	Experiment	C	5	07Experiment	81.5	5.5	75.5	3	7
2387	1	7	Experiment	C	6	07Experiment	62.5	5.5	48	3	7
2403	1	7	Experiment	C	7	07Experiment	24	5.5	22.5	3	7
2419	1	7	Experiment	C	8	07Experiment	24.5	5.5	27	3	7
2435	1	7	Experiment	C	9	07Experiment	55.5	5.5	52	3	7
2451	1	7	Experiment	C	10	07Experiment	41.5	5.5	43	3	7
2467	1	7	Experiment	C	11	07Experiment	42	5.5	45.5	3	7
2483	1	7	Experiment	C	12	07Experiment	76.5	5.5	87	3	7
2499	1	7	Experiment	C	13	07Experiment	37.5	5.5	46.5	3	7
2515	1	7	Experiment	C	14	07Experiment	34.5	5.5	40	3	7
2531	1	7	Experiment	C	15	07Experiment	71.5	5.5	32	3	7
2547	1	7	Experiment	C	16	07Experiment	32	5.5	47.5	3	7
2563	1	7	Experiment	C	17	07Experiment	32.5	5.5	47.5	3	7
2579	1	7	Experiment	C	18	07Experiment	31.5	5.5	49	3	7
2595	1	7	Experiment	C	19	07Experiment	63.5	5.5	67	3	7
2611	1	7	Experiment	C	20	07Experiment	39.5	5.5	47.5	3	7
2627	1	7	Experiment	C	21	07Experiment	41	5.5	43	3	7
2643	1	7	Experiment	C	22	07Experiment	47	5.5	52	3	7
2659	1	7	Experiment	C	23	07Experiment	12.5	5.5	34	3	7
2675	1	7	Experiment	C	24	07Experiment	0.5	5.5	42	3	7	X
2308	1	7	Experiment	D	1	07Experiment	50	7.5	38.5	4	7
2324	1	7	Experiment	D	2	07Experiment	60	7.5	39	4	7
2340	1	7	Experiment	D	3	07Experiment	57.5	7.5	39.5	4	7
2356	1	7	Experiment	D	4	07Experiment	62	7.5	35	4	7
2372	1	7	Experiment	D	5	07Experiment	53.5	7.5	31	4	7
2388	1	7	Experiment	D	6	07Experiment	38.5	7.5	24	4	7
[truncated: 7,986 more rows]

## Sheet: SC based conditions
RXPY:	X	Y
	EXP	Plate	Type	Row	Col	PlateNames	Exp Size	RowNumeric	Ctrl Size	RowNumeric	ORDER OF THE COLUMN IN THE HEATMAP (internal use only)	PINNING error
1	3	1	Experiment	A	1	01Experiment	34	1.5	51.5	1	1
17	3	1	Experiment	A	2	01Experiment	37	1.5	58	1	1
33	3	1	Experiment	A	3	01Experiment	33	1.5	51	1	1
49	3	1	Experiment	A	4	01Experiment	34	1.5	50.5	1	1
65	3	1	Experiment	A	5	01Experiment	63	1.5	65.5	1	1
81	3	1	Experiment	A	6	01Experiment	47.5	1.5	56	1	1
97	3	1	Experiment	A	7	01Experiment	56.5	1.5	68	1	1
113	3	1	Experiment	A	8	01Experiment	47	1.5	50	1	1
129	3	1	Experiment	A	9	01Experiment	39	1.5	39.5	1	1
145	3	1	Experiment	A	10	01Experiment	44	1.5	48	1	1
161	3	1	Experiment	A	11	01Experiment	48.5	1.5	56	1	1
177	3	1	Experiment	A	12	01Experiment	65	1.5	66.5	1	1
193	3	1	Experiment	A	13	01Experiment	48	1.5	58.5	1	1
209	3	1	Experiment	A	14	01Experiment	50.5	1.5	60	1	1
225	3	1	Experiment	A	15	01Experiment	49.5	1.5	56.5	1	1
241	3	1	Experiment	A	16	01Experiment	57	1.5	58.5	1	1
257	3	1	Experiment	A	17	01Experiment	49.5	1.5	55	1	1
273	3	1	Experiment	A	18	01Experiment	101	1.5	87.5	1	1
289	3	1	Experiment	A	19	01Experiment	45	1.5	52.5	1	1
305	3	1	Experiment	A	20	01Experiment	47	1.5	55	1	1
321	3	1	Experiment	A	21	01Experiment	56	1.5	59	1	1
337	3	1	Experiment	A	22	01Experiment	49.5	1.5	59.5	1	1
353	3	1	Experiment	A	23	01Experiment	45.5	1.5	60.5	1	1
369	3	1	Experiment	A	24	01Experiment	71.5	1.5	75.5	1	1
2	3	1	Experiment	B	1	01Experiment	35.5	3.5	52.5	2	1
18	3	1	Experiment	B	2	01Experiment	31.5	3.5	38.5	2	1
34	3	1	Experiment	B	3	01Experiment	31	3.5	38	2	1
50	3	1	Experiment	B	4	01Experiment	48.5	3.5	65	2	1
66	3	1	Experiment	B	5	01Experiment	35.5	3.5	44.5	2	1
82	3	1	Experiment	B	6	01Experiment	40	3.5	47	2	1
98	3	1	Experiment	B	7	01Experiment	43	3.5	47	2	1
114	3	1	Experiment	B	8	01Experiment	47.5	3.5	50.5	2	1
130	3	1	Experiment	B	9	01Experiment	27.5	3.5	33.5	2	1
146	3	1	Experiment	B	10	01Experiment	30	3.5	30.5	2	1
162	3	1	Experiment	B	11	01Experiment	47	3.5	51	2	1
178	3	1	Experiment	B	12	01Experiment	47	3.5	50.5	2	1
194	3	1	Experiment	B	13	01Experiment	63.5	3.5	63.5	2	1
210	3	1	Experiment	B	14	01Experiment	47	3.5	49	2	1
226	3	1	Experiment	B	15	01Experiment	44.5	3.5	47.5	2	1
242	3	1	Experiment	B	16	01Experiment	45	3.5	48.5	2	1
258	3	1	Experiment	B	17	01Experiment	34	3.5	39.5	2	1
274	3	1	Experiment	B	18	01Experiment	42.5	3.5	49	2	1
290	3	1	Experiment	B	19	01Experiment	44.5	3.5	49.5	2	1
306	3	1	Experiment	B	20	01Experiment	42	3.5	48.5	2	1
322	3	1	Experiment	B	21	01Experiment	48.5	3.5	55.5	2	1
338	3	1	Experiment	B	22	01Experiment	45.5	3.5	52	2	1
354	3	1	Experiment	B	23	01Experiment	47	3.5	55	2	1
370	3	1	Experiment	B	24	01Experiment	53	3.5	59.5	2	1
3	3	1	Experiment	C	1	01Experiment	34	5.5	50.5	3	1
19	3	1	Experiment	C	2	01Experiment	26	5.5	44.5	3	1
35	3	1	Experiment	C	3	01Experiment	36	5.5	42.5	3	1
51	3	1	Experiment	C	4	01Experiment	30.5	5.5	33.5	3	1
67	3	1	Experiment	C	5	01Experiment	59	5.5	59.5	3	1
83	3	1	Experiment	C	6	01Experiment	44.5	5.5	50	3	1
99	3	1	Experiment	C	7	01Experiment	40.5	5.5	47.5	3	1
115	3	1	Experiment	C	8	01Experiment	23	5.5	19.5	3	1
131	3	1	Experiment	C	9	01Experiment	48	5.5	43	3	1
147	3	1	Experiment	C	10	01Experiment	42	5.5	46	3	1
163	3	1	Experiment	C	11	01Experiment	43.5	5.5	45	3	1
179	3	1	Experiment	C	12	01Experiment	70.5	5.5	60.5	3	1
195	3	1	Experiment	C	13	01Experiment	42.5	5.5	45	3	1
211	3	1	Experiment	C	14	01Experiment	43.5	5.5	47	3	1
227	3	1	Experiment	C	15	01Experiment	45.5	5.5	41	3	1
243	3	1	Experiment	C	16	01Experiment	39.5	5.5	46.5	3	1
259	3	1	Experiment	C	17	01Experiment	38.5	5.5	45.5	3	1
275	3	1	Experiment	C	18	01Experiment	39	5.5	46	3	1
291	3	1	Experiment	C	19	01Experiment	60	5.5	67	3	1
307	3	1	Experiment	C	20	01Experiment	46.5	5.5	46.5	3	1
323	3	1	Experiment	C	21	01Experiment	43	5.5	48.5	3	1
339	3	1	Experiment	C	22	01Experiment	58	5.5	56	3	1
355	3	1	Experiment	C	23	01Experiment	33	5.5	37	3	1
371	3	1	Experiment	C	24	01Experiment	60	5.5	60.5	3	1
4	3	1	Experiment	D	1	01Experiment	32	7.5	47	4	1
20	3	1	Experiment	D	2	01Experiment	33	7.5	46	4	1
36	3	1	Experiment	D	3	01Experiment	35	7.5	41.5	4	1
52	3	1	Experiment	D	4	01Experiment	30	7.5	44	4	1
68	3	1	Experiment	D	5	01Experiment	32	7.5	34	4	1
84	3	1	Experiment	D	6	01Experiment	36.5	7.5	38.5	4	1
100	3	1	Experiment	D	7	01Experiment	39.5	7.5	42.5	4	1
116	3	1	Experiment	D	8	01Experiment	39.5	7.5	52.5	4	1
132	3	1	Experiment	D	9	01Experiment	43	7.5	45.5	4	1
148	3	1	Experiment	D	10	01Experiment	38.5	7.5	43.5	4	1
164	3	1	Experiment	D	11	01Experiment	40.5	7.5	43	4	1
180	3	1	Experiment	D	12	01Experiment	41.5	7.5	44	4	1
196	3	1	Experiment	D	13	01Experiment	31	7.5	31.5	4	1
212	3	1	Experiment	D	14	01Experiment	41	7.5	45.5	4	1
228	3	1	Experiment	D	15	01Experiment	37	7.5	44.5	4	1
244	3	1	Experiment	D	16	01Experiment	38	7.5	44.5	4	1
260	3	1	Experiment	D	17	01Experiment	36.5	7.5	45.5	4	1
276	3	1	Experiment	D	18	01Experiment	43	7.5	42.5	4	1
292	3	1	Experiment	D	19	01Experiment	42.5	7.5	51.5	4	1
308	3	1	Experiment	D	20	01Experiment	40	7.5	44	4	1
324	3	1	Experiment	D	21	01Experiment	19	7.5	19.5	4	1
340	3	1	Experiment	D	22	01Experiment	60	7.5	53	4	1
356	3	1	Experiment	D	23	01Experiment	41	7.5	50	4	1
372	3	1	Experiment	D	24	01Experiment	45	7.5	55	4	1
5	3	1	Experiment	E	1	01Experiment	51	9.5	56.5	5	1
21	3	1	Experiment	E	2	01Experiment	28.5	9.5	43	5	1
37	3	1	Experiment	E	3	01Experiment	40	9.5	48.5	5	1
53	3	1	Experiment	E	4	01Experiment	9.5	9.5	18	5	1
69	3	1	Experiment	E	5	01Experiment	35.5	9.5	34.5	5	1
85	3	1	Experiment	E	6	01Experiment	62.5	9.5	59	5	1
101	3	1	Experiment	E	7	01Experiment	41	9.5	40	5	1
117	3	1	Experiment	E	8	01Experiment	30	9.5	37	5	1
133	3	1	Experiment	E	9	01Experiment	35.5	9.5	35.5	5	1
149	3	1	Experiment	E	10	01Experiment	38	9.5	40	5	1
165	3	1	Experiment	E	11	01Experiment	52.5	9.5	51.5	5	1
181	3	1	Experiment	E	12	01Experiment	40	9.5	38.5	5	1
197	3	1	Experiment	E	13	01Experiment	68	9.5	63.5	5	1
213	3	1	Experiment	E	14	01Experiment	40	9.5	45	5	1
229	3	1	Experiment	E	15	01Experiment	23.5	9.5	22.5	5	1
245	3	1	Experiment	E	16	01Experiment	43	9.5	46	5	1
261	3	1	Experiment	E	17	01Experiment	64.5	9.5	70	5	1
277	3	1	Experiment	E	18	01Experiment	41.5	9.5	42.5	5	1
293	3	1	Experiment	E	19	01Experiment	36.5	9.5	45	5	1
309	3	1	Experiment	E	20	01Experiment	34.5	9.5	39.5	5	1
325	3	1	Experiment	E	21	01Experiment	29	9.5	44.5	5	1
341	3	1	Experiment	E	22	01Experiment	34.5	9.5	40	5	1
357	3	1	Experiment	E	23	01Experiment	64	9.5	56.5	5	1
373	3	1	Experiment	E	24	01Experiment	44	9.5	44	5	1
6	3	1	Experiment	F	1	01Experiment	34	11.5	41.5	6	1
22	3	1	Experiment	F	2	01Experiment	31	11.5	41.5	6	1
38	3	1	Experiment	F	3	01Experiment	29	11.5	37.5	6	1
54	3	1	Experiment	F	4	01Experiment	31.5	11.5	41	6	1
70	3	1	Experiment	F	5	01Experiment	36	11.5	42.5	6	1
86	3	1	Experiment	F	6	01Experiment	31	11.5	38.5	6	1
102	3	1	Experiment	F	7	01Experiment	40.5	11.5	40	6	1
118	3	1	Experiment	F	8	01Experiment	37.5	11.5	42.5	6	1
134	3	1	Experiment	F	9	01Experiment	7.5	11.5	5.5	6	1
150	3	1	Experiment	F	10	01Experiment	25.5	11.5	22.5	6	1
166	3	1	Experiment	F	11	01Experiment	43.5	11.5	43.5	6	1
182	3	1	Experiment	F	12	01Experiment	38.5	11.5	39.5	6	1
198	3	1	Experiment	F	13	01Experiment	56.5	11.5	56	6	1
214	3	1	Experiment	F	14	01Experiment	38	11.5	44	6	1
230	3	1	Experiment	F	15	01Experiment	35.5	11.5	42	6	1
246	3	1	Experiment	F	16	01Experiment	37.5	11.5	44	6	1
262	3	1	Experiment	F	17	01Experiment	36.5	11.5	40.5	6	1
278	3	1	Experiment	F	18	01Experiment	37	11.5	43	6	1
294	3	1	Experiment	F	19	01Experiment	33	11.5	42	6	1
310	3	1	Experiment	F	20	01Experiment	42.5	11.5	48.5	6	1
326	3	1	Experiment	F	21	01Experiment	35.5	11.5	43	6	1
342	3	1	Experiment	F	22	01Experiment	67.5	11.5	57.5	6	1
358	3	1	Experiment	F	23	01Experiment	37.5	11.5	52.5	6	1
374	3	1	Experiment	F	24	01Experiment	40.5	11.5	51.5	6	1
7	3	1	Experiment	G	1	01Experiment	66	13.5	68.5	7	1
23	3	1	Experiment	G	2	01Experiment	31.5	13.5	36.5	7	1
39	3	1	Experiment	G	3	01Experiment	31.5	13.5	30	7	1
55	3	1	Experiment	G	4	01Experiment	31	13.5	40	7	1
71	3	1	Experiment	G	5	01Experiment	35	13.5	37	7	1
87	3	1	Experiment	G	6	01Experiment	36	13.5	38	7	1
103	3	1	Experiment	G	7	01Experiment	39	13.5	39.5	7	1
119	3	1	Experiment	G	8	01Experiment	34	13.5	40.5	7	1
135	3	1	Experiment	G	9	01Experiment	31	13.5	31	7	1
151	3	1	Experiment	G	10	01Experiment	39.5	13.5	39	7	1
167	3	1	Experiment	G	11	01Experiment	4	13.5	4.5	7	1
183	3	1	Experiment	G	12	01Experiment	39.5	13.5	43	7	1
199	3	1	Experiment	G	13	01Experiment	36	13.5	39	7	1
215	3	1	Experiment	G	14	01Experiment	50.5	13.5	53.5	7	1
231	3	1	Experiment	G	15	01Experiment	36	13.5	41	7	1
247	3	1	Experiment	G	16	01Experiment	36.5	13.5	40	7	1
263	3	1	Experiment	G	17	01Experiment	35.5	13.5	42	7	1
279	3	1	Experiment	G	18	01Experiment	35	13.5	42	7	1
295	3	1	Experiment	G	19	01Experiment	34.5	13.5	43.5	7	1
311	3	1	Experiment	G	20	01Experiment	39.5	13.5	43	7	1
327	3	1	Experiment	G	21	01Experiment	0	13.5	39.5	7	1
343	3	1	Experiment	G	22	01Experiment	34.5	13.5	40	7	1
359	3	1	Experiment	G	23	01Experiment	67.5	13.5	75.5	7	1
375	3	1	Experiment	G	24	01Experiment	44	13.5	45	7	1
8	3	1	Experiment	H	1	01Experiment	44	15.5	51.5	8	1
24	3	1	Experiment	H	2	01Experiment	39	15.5	42.5	8	1
40	3	1	Experiment	H	3	01Experiment	36.5	15.5	36.5	8	1
56	3	1	Experiment	H	4	01Experiment	30	15.5	39	8	1
72	3	1	Experiment	H	5	01Experiment	33.5	15.5	36	8	1
88	3	1	Experiment	H	6	01Experiment	33.5	15.5	33.5	8	1
104	3	1	Experiment	H	7	01Experiment	37.5	15.5	37	8	1
120	3	1	Experiment	H	8	01Experiment	36	15.5	36.5	8	1
136	3	1	Experiment	H	9	01Experiment	38	15.5	40.5	8	1
152	3	1	Experiment	H	10	01Experiment	39.5	15.5	38.5	8	1
168	3	1	Experiment	H	11	01Experiment	40	15.5	40	8	1
184	3	1	Experiment	H	12	01Experiment	39	15.5	40.5	8	1
200	3	1	Experiment	H	13	01Experiment	39.5	15.5	45	8	1
216	3	1	Experiment	H	14	01Experiment	24.5	15.5	24.5	8	1
232	3	1	Experiment	H	15	01Experiment	25	15.5	23.5	8	1
248	3	1	Experiment	H	16	01Experiment	34	15.5	39.5	8	1
264	3	1	Experiment	H	17	01Experiment	33.5	15.5	39	8	1
280	3	1	Experiment	H	18	01Experiment	34	15.5	37	8	1
296	3	1	Experiment	H	19	01Experiment	33.5	15.5	44	8	1
312	3	1	Experiment	H	20	01Experiment	34.5	15.5	39.5	8	1
328	3	1	Experiment	H	21	01Experiment	51	15.5	46	8	1
344	3	1	Experiment	H	22	01Experiment	34	15.5	37	8	1
360	3	1	Experiment	H	23	01Experiment	36	15.5	38	8	1
376	3	1	Experiment	H	24	01Experiment	34.5	15.5	43.5	8	1
9	3	1	Experiment	I	1	01Experiment	38	17.5	43.5	9	1
25	3	1	Experiment	I	2	01Experiment	27	17.5	31	9	1
41	3	1	Experiment	I	3	01Experiment	33	17.5	32.5	9	1
57	3	1	Experiment	I	4	01Experiment	25	17.5	34.5	9	1
73	3	1	Experiment	I	5	01Experiment	31.5	17.5	31.5	9	1
89	3	1	Experiment	I	6	01Experiment	28.5	17.5	32.5	9	1
105	3	1	Experiment	I	7	01Experiment	47.5	17.5	42	9	1
121	3	1	Experiment	I	8	01Experiment	33.5	17.5	36	9	1
137	3	1	Experiment	I	9	01Experiment	48	17.5	45	9	1
153	3	1	Experiment	I	10	01Experiment	43.5	17.5	35	9	1
169	3	1	Experiment	I	11	01Experiment	35	17.5	35	9	1
185	3	1	Experiment	I	12	01Experiment	36.5	17.5	37.5	9	1
201	3	1	Experiment	I	13	01Experiment	39.5	17.5	43	9	1
217	3	1	Experiment	I	14	01Experiment	31.5	17.5	36.5	9	1
233	3	1	Experiment	I	15	01Experiment	12.5	17.5	13.5	9	1
249	3	1	Experiment	I	16	01Experiment	35	17.5	36.5	9	1
265	3	1	Experiment	I	17	01Experiment	32	17.5	36	9	1
281	3	1	Experiment	I	18	01Experiment	32	17.5	38.5	9	1
297	3	1	Experiment	I	19	01Experiment	44	17.5	45.5	9	1
313	3	1	Experiment	I	20	01Experiment	33	17.5	37	9	1
329	3	1	Experiment	I	21	01Experiment	39	17.5	36	9	1
345	3	1	Experiment	I	22	01Experiment	37	17.5	41	9	1
361	3	1	Experiment	I	23	01Experiment	17	17.5	16.5	9	1
377	3	1	Experiment	I	24	01Experiment	40	17.5	55	9	1
10	3	1	Experiment	J	1	01Experiment	39.5	19.5	43	10	1
26	3	1	Experiment	J	2	01Experiment	34	19.5	38.5	10	1
42	3	1	Experiment	J	3	01Experiment	35	19.5	35.5	10	1
58	3	1	Experiment	J	4	01Experiment	27.5	19.5	36.5	10	1
74	3	1	Experiment	J	5	01Experiment	29	19.5	29.5	10	1
90	3	1	Experiment	J	6	01Experiment	33	19.5	33.5	10	1
106	3	1	Experiment	J	7	01Experiment	51	19.5	43	10	1
122	3	1	Experiment	J	8	01Experiment	33	19.5	35	10	1
138	3	1	Experiment	J	9	01Experiment	37	19.5	35.5	10	1
154	3	1	Experiment	J	10	01Experiment	38	19.5	34	10	1
170	3	1	Experiment	J	11	01Experiment	37.5	19.5	36.5	10	1
186	3	1	Experiment	J	12	01Experiment	32.5	19.5	36	10	1
202	3	1	Experiment	J	13	01Experiment	31.5	19.5	32.5	10	1
218	3	1	Experiment	J	14	01Experiment	32	19.5	35	10	1
234	3	1	Experiment	J	15	01Experiment	33	19.5	32	10	1
250	3	1	Experiment	J	16	01Experiment	30.5	19.5	34.5	10	1
266	3	1	Experiment	J	17	01Experiment	31	19.5	37	10	1
282	3	1	Experiment	J	18	01Experiment	35.5	19.5	36.5	10	1
298	3	1	Experiment	J	19	01Experiment	60	19.5	56	10	1
314	3	1	Experiment	J	20	01Experiment	7	19.5	5	10	1
330	3	1	Experiment	J	21	01Experiment	37	19.5	34.5	10	1
346	3	1	Experiment	J	22	01Experiment	27.5	19.5	34	10	1
362	3	1	Experiment	J	23	01Experiment	28	19.5	32.5	10	1
378	3	1	Experiment	J	24	01Experiment	36	19.5	43.5	10	1
11	3	1	Experiment	K	1	01Experiment	35.5	21.5	42.5	11	1
27	3	1	Experiment	K	2	01Experiment	21.5	21.5	37	11	1
43	3	1	Experiment	K	3	01Experiment	33	21.5	33.5	11	1
59	3	1	Experiment	K	4	01Experiment	28	21.5	31.5	11	1
75	3	1	Experiment	K	5	01Experiment	32	21.5	35.5	11	1
91	3	1	Experiment	K	6	01Experiment	32	21.5	32	11	1
107	3	1	Experiment	K	7	01Experiment	37	21.5	41	11	1
123	3	1	Experiment	K	8	01Experiment	29.5	21.5	34.5	11	1
139	3	1	Experiment	K	9	01Experiment	36	21.5	35.5	11	1
155	3	1	Experiment	K	10	01Experiment	34.5	21.5	33.5	11	1
171	3	1	Experiment	K	11	01Experiment	33.5	21.5	36.5	11	1
187	3	1	Experiment	K	12	01Experiment	17.5	21.5	35.5	11	1
203	3	1	Experiment	K	13	01Experiment	31.5	21.5	29.5	11	1
219	3	1	Experiment	K	14	01Experiment	35	21.5	32.5	11	1
235	3	1	Experiment	K	15	01Experiment	7.5	21.5	5.5	11	1
251	3	1	Experiment	K	16	01Experiment	33	21.5	38.5	11	1
267	3	1	Experiment	K	17	01Experiment	15	21.5	20	11	1
283	3	1	Experiment	K	18	01Experiment	30	21.5	33	11	1
299	3	1	Experiment	K	19	01Experiment	24	21.5	24	11	1
315	3	1	Experiment	K	20	01Experiment	32.5	21.5	35.5	11	1
331	3	1	Experiment	K	21	01Experiment	22	21.5	26.5	11	1
347	3	1	Experiment	K	22	01Experiment	38	21.5	38.5	11	1
363	3	1	Experiment	K	23	01Experiment	29	21.5	36.5	11	1
379	3	1	Experiment	K	24	01Experiment	37.5	21.5	45	11	1
12	3	1	Experiment	L	1	01Experiment	33.5	23.5	41.5	12	1
28	3	1	Experiment	L	2	01Experiment	32	23.5	35.5	12	1
44	3	1	Experiment	L	3	01Experiment	26	23.5	32	12	1
60	3	1	Experiment	L	4	01Experiment	28.5	23.5	32	12	1
76	3	1	Experiment	L	5	01Experiment	31.5	23.5	31.5	12	1
92	3	1	Experiment	L	6	01Experiment	32.5	23.5	30	12	1
108	3	1	Experiment	L	7	01Experiment	29.5	23.5	31	12	1
124	3	1	Experiment	L	8	01Experiment	31	23.5	34.5	12	1
140	3	1	Experiment	L	9	01Experiment	40	23.5	39	12	1
156	3	1	Experiment	L	10	01Experiment	33.5	23.5	32	12	1
172	3	1	Experiment	L	11	01Experiment	18	23.5	23	12	1
188	3	1	Experiment	L	12	01Experiment	34	23.5	36	12	1
204	3	1	Experiment	L	13	01Experiment	26	23.5	27.5	12	1
220	3	1	Experiment	L	14	01Experiment	29.5	23.5	25.5	12	1
236	3	1	Experiment	L	15	01Experiment	27	23.5	36	12	1
252	3	1	Experiment	L	16	01Experiment	0	23.5	0	12	1
268	3	1	Experiment	L	17	01Experiment	29.5	23.5	37.5	12	1
284	3	1	Experiment	L	18	01Experiment	15	23.5	15.5	12	1
300	3	1	Experiment	L	19	01Experiment	44	23.5	40.5	12	1
316	3	1	Experiment	L	20	01Experiment	0	23.5	0	12	1
332	3	1	Experiment	L	21	01Experiment	27.5	23.5	36.5	12	1
348	3	1	Experiment	L	22	01Experiment	1	23.5	2	12	1
364	3	1	Experiment	L	23	01Experiment	46	23.5	42.5	12	1
380	3	1	Experiment	L	24	01Experiment	38.5	23.5	44	12	1
13	3	1	Experiment	M	1	01Experiment	27	25.5	37	13	1
29	3	1	Experiment	M	2	01Experiment	24	25.5	32.5	13	1
45	3	1	Experiment	M	3	01Experiment	41.5	25.5	39	13	1
61	3	1	Experiment	M	4	01Experiment	25.5	25.5	33	13	1
77	3	1	Experiment	M	5	01Experiment	35.5	25.5	34.5	13	1
93	3	1	Experiment	M	6	01Experiment	31.5	25.5	31	13	1
109	3	1	Experiment	M	7	01Experiment	34.5	25.5	35	13	1
125	3	1	Experiment	M	8	01Experiment	38.5	25.5	43	13	1
141	3	1	Experiment	M	9	01Experiment	39	25.5	35	13	1
157	3	1	Experiment	M	10	01Experiment	36	25.5	33	13	1
173	3	1	Experiment	M	11	01Experiment	46.5	25.5	39.5	13	1
189	3	1	Experiment	M	12	01Experiment	39.5	25.5	39	13	1
205	3	1	Experiment	M	13	01Experiment	31.5	25.5	34.5	13	1
221	3	1	Experiment	M	14	01Experiment	30	25.5	36.5	13	1
237	3	1	Experiment	M	15	01Experiment	29	25.5	35.5	13	1
253	3	1	Experiment	M	16	01Experiment	34	25.5	34	13	1
269	3	1	Experiment	M	17	01Experiment	30.5	25.5	36.5	13	1
285	3	1	Experiment	M	18	01Experiment	33.5	25.5	35	13	1
301	3	1	Experiment	M	19	01Experiment	25.5	25.5	33	13	1
317	3	1	Experiment	M	20	01Experiment	32.5	25.5	32.5	13	1
333	3	1	Experiment	M	21	01Experiment	31.5	25.5	37	13	1
349	3	1	Experiment	M	22	01Experiment	0	25.5	32.5	13	1
365	3	1	Experiment	M	23	01Experiment	32	25.5	38	13	1
381	3	1	Experiment	M	24	01Experiment	36.5	25.5	40.5	13	1
14	3	1	Experiment	N	1	01Experiment	26	27.5	32	14	1
30	3	1	Experiment	N	2	01Experiment	25	27.5	25	14	1
46	3	1	Experiment	N	3	01Experiment	22.5	27.5	15	14	1
62	3	1	Experiment	N	4	01Experiment	26	27.5	25	14	1
78	3	1	Experiment	N	5	01Experiment	31.5	27.5	33	14	1
94	3	1	Experiment	N	6	01Experiment	31.5	27.5	29	14	1
110	3	1	Experiment	N	7	01Experiment	28.5	27.5	36	14	1
126	3	1	Experiment	N	8	01Experiment	28	27.5	35	14	1
142	3	1	Experiment	N	9	01Experiment	34	27.5	30	14	1
158	3	1	Experiment	N	10	01Experiment	31	27.5	33.5	14	1
174	3	1	Experiment	N	11	01Experiment	38.5	27.5	30.5	14	1
190	3	1	Experiment	N	12	01Experiment	33.5	27.5	35	14	1
206	3	1	Experiment	N	13	01Experiment	15.5	27.5	16.5	14	1
222	3	1	Experiment	N	14	01Experiment	4	27.5	7	14	1
238	3	1	Experiment	N	15	01Experiment	32	27.5	34	14	1
254	3	1	Experiment	N	16	01Experiment	35.5	27.5	36	14	1
270	3	1	Experiment	N	17	01Experiment	30.5	27.5	34.5	14	1
286	3	1	Experiment	N	18	01Experiment	30	27.5	33.5	14	1
302	3	1	Experiment	N	19	01Experiment	30	27.5	34.5	14	1
318	3	1	Experiment	N	20	01Experiment	29	27.5	34	14	1
334	3	1	Experiment	N	21	01Experiment	26.5	27.5	32.5	14	1
350	3	1	Experiment	N	22	01Experiment	28	27.5	34.5	14	1
366	3	1	Experiment	N	23	01Experiment	27	27.5	37.5	14	1
382	3	1	Experiment	N	24	01Experiment	42.5	27.5	47	14	1
15	3	1	Experiment	O	1	01Experiment	22.5	29.5	11	15	1
31	3	1	Experiment	O	2	01Experiment	29	29.5	26.5	15	1
47	3	1	Experiment	O	3	01Experiment	25.5	29.5	22.5	15	1
63	3	1	Experiment	O	4	01Experiment	14.5	29.5	22.5	15	1
79	3	1	Experiment	O	5	01Experiment	25	29.5	17	15	1
95	3	1	Experiment	O	6	01Experiment	14.5	29.5	33	15	1
111	3	1	Experiment	O	7	01Experiment	28	29.5	28	15	1
127	3	1	Experiment	O	8	01Experiment	38.5	29.5	31	15	1
143	3	1	Experiment	O	9	01Experiment	45	29.5	39.5	15	1
159	3	1	Experiment	O	10	01Experiment	25	29.5	33	15	1
175	3	1	Experiment	O	11	01Experiment	35	29.5	38	15	1
191	3	1	Experiment	O	12	01Experiment	35.5	29.5	30.5	15	1
207	3	1	Experiment	O	13	01Experiment	22	29.5	29	15	1
223	3	1	Experiment	O	14	01Experiment	27	29.5	32	15	1
239	3	1	Experiment	O	15	01Experiment	32	29.5	34	15	1
255	3	1	Experiment	O	16	01Experiment	34.5	29.5	34	15	1
271	3	1	Experiment	O	17	01Experiment	46.5	29.5	42	15	1
287	3	1	Experiment	O	18	01Experiment	29	29.5	28.5	15	1
303	3	1	Experiment	O	19	01Experiment	31.5	29.5	36	15	1
319	3	1	Experiment	O	20	01Experiment	18.5	29.5	19	15	1
335	3	1	Experiment	O	21	01Experiment	31	29.5	39	15	1
351	3	1	Experiment	O	22	01Experiment	22	29.5	22	15	1
367	3	1	Experiment	O	23	01Experiment	30	29.5	42	15	1
383	3	1	Experiment	O	24	01Experiment	44.5	29.5	48	15	1
16	3	1	Experiment	P	1	01Experiment	43.5	31.5	52	16	1
32	3	1	Experiment	P	2	01Experiment	36.5	31.5	42.5	16	1
48	3	1	Experiment	P	3	01Experiment	35	31.5	40.5	16	1
64	3	1	Experiment	P	4	01Experiment	35.5	31.5	43.5	16	1
80	3	1	Experiment	P	5	01Experiment	37.5	31.5	42	16	1
96	3	1	Experiment	P	6	01Experiment	35	31.5	39.5	16	1
112	3	1	Experiment	P	7	01Experiment	36.5	31.5	42	16	1
128	3	1	Experiment	P	8	01Experiment	40.5	31.5	45.5	16	1
144	3	1	Experiment	P	9	01Experiment	25	31.5	19	16	1
160	3	1	Experiment	P	10	01Experiment	50.5	31.5	51	16	1
176	3	1	Experiment	P	11	01Experiment	42	31.5	45	16	1
192	3	1	Experiment	P	12	01Experiment	50.5	31.5	52.5	16	1
208	3	1	Experiment	P	13	01Experiment	14.5	31.5	11.5	16	1
224	3	1	Experiment	P	14	01Experiment	41	31.5	44.5	16	1
240	3	1	Experiment	P	15	01Experiment	60	31.5	54	16	1
256	3	1	Experiment	P	16	01Experiment	43	31.5	47.5	16	1
272	3	1	Experiment	P	17	01Experiment	39.5	31.5	40.5	16	1
288	3	1	Experiment	P	18	01Experiment	43.5	31.5	44	16	1
304	3	1	Experiment	P	19	01Experiment	17.5	31.5	26.5	16	1
320	3	1	Experiment	P	20	01Experiment	45	31.5	47	16	1
336	3	1	Experiment	P	21	01Experiment	52	31.5	57	16	1
352	3	1	Experiment	P	22	01Experiment	47.5	31.5	49.5	16	1
368	3	1	Experiment	P	23	01Experiment	21.5	31.5	27	16	1
384	3	1	Experiment	P	24	01Experiment	46.5	31.5	49	16	1
385	3	2	Experiment	A	1	02Experiment	43	1.5	51.5	1	2
401	3	2	Experiment	A	2	02Experiment	39.5	1.5	58	1	2
417	3	2	Experiment	A	3	02Experiment	39.5	1.5	51	1	2
433	3	2	Experiment	A	4	02Experiment	45	1.5	50.5	1	2
449	3	2	Experiment	A	5	02Experiment	60	1.5	65.5	1	2
465	3	2	Experiment	A	6	02Experiment	50	1.5	56	1	2
481	3	2	Experiment	A	7	02Experiment	55	1.5	68	1	2
497	3	2	Experiment	A	8	02Experiment	43.5	1.5	50	1	2
513	3	2	Experiment	A	9	02Experiment	35.5	1.5	39.5	1	2
529	3	2	Experiment	A	10	02Experiment	47	1.5	48	1	2
545	3	2	Experiment	A	11	02Experiment	55.5	1.5	56	1	2
561	3	2	Experiment	A	12	02Experiment	65	1.5	66.5	1	2
577	3	2	Experiment	A	13	02Experiment	60.5	1.5	58.5	1	2
593	3	2	Experiment	A	14	02Experiment	58	1.5	60	1	2
609	3	2	Experiment	A	15	02Experiment	59	1.5	56.5	1	2
625	3	2	Experiment	A	16	02Experiment	47.5	1.5	58.5	1	2
641	3	2	Experiment	A	17	02Experiment	59	1.5	55	1	2
657	3	2	Experiment	A	18	02Experiment	84.5	1.5	87.5	1	2
673	3	2	Experiment	A	19	02Experiment	53.5	1.5	52.5	1	2
689	3	2	Experiment	A	20	02Experiment	55	1.5	55	1	2
705	3	2	Experiment	A	21	02Experiment	64.5	1.5	59	1	2
721	3	2	Experiment	A	22	02Experiment	59	1.5	59.5	1	2
737	3	2	Experiment	A	23	02Experiment	54	1.5	60.5	1	2
753	3	2	Experiment	A	24	02Experiment	63.5	1.5	75.5	1	2
386	3	2	Experiment	B	1	02Experiment	42.5	3.5	52.5	2	2
402	3	2	Experiment	B	2	02Experiment	30.5	3.5	38.5	2	2
418	3	2	Experiment	B	3	02Experiment	31	3.5	38	2	2
434	3	2	Experiment	B	4	02Experiment	56	3.5	65	2	2
450	3	2	Experiment	B	5	02Experiment	39.5	3.5	44.5	2	2
466	3	2	Experiment	B	6	02Experiment	41.5	3.5	47	2	2
482	3	2	Experiment	B	7	02Experiment	44	3.5	47	2	2
498	3	2	Experiment	B	8	02Experiment	52.5	3.5	50.5	2	2
514	3	2	Experiment	B	9	02Experiment	26.5	3.5	33.5	2	2
530	3	2	Experiment	B	10	02Experiment	32	3.5	30.5	2	2
546	3	2	Experiment	B	11	02Experiment	53	3.5	51	2	2
562	3	2	Experiment	B	12	02Experiment	49.5	3.5	50.5	2	2
578	3	2	Experiment	B	13	02Experiment	67	3.5	63.5	2	2
594	3	2	Experiment	B	14	02Experiment	53.5	3.5	49	2	2
610	3	2	Experiment	B	15	02Experiment	52.5	3.5	47.5	2	2
626	3	2	Experiment	B	16	02Experiment	55.5	3.5	48.5	2	2
642	3	2	Experiment	B	17	02Experiment	37	3.5	39.5	2	2
658	3	2	Experiment	B	18	02Experiment	51	3.5	49	2	2
674	3	2	Experiment	B	19	02Experiment	63.5	3.5	49.5	2	2
690	3	2	Experiment	B	20	02Experiment	48.5	3.5	48.5	2	2
706	3	2	Experiment	B	21	02Experiment	58.5	3.5	55.5	2	2
722	3	2	Experiment	B	22	02Experiment	60.5	3.5	52	2	2
738	3	2	Experiment	B	23	02Experiment	55.5	3.5	55	2	2
754	3	2	Experiment	B	24	02Experiment	61.5	3.5	59.5	2	2
387	3	2	Experiment	C	1	02Experiment	39	5.5	50.5	3	2
403	3	2	Experiment	C	2	02Experiment	36	5.5	44.5	3	2
419	3	2	Experiment	C	3	02Experiment	41	5.5	42.5	3	2
435	3	2	Experiment	C	4	02Experiment	25	5.5	33.5	3	2
451	3	2	Experiment	C	5	02Experiment	57	5.5	59.5	3	2
467	3	2	Experiment	C	6	02Experiment	48.5	5.5	50	3	2
483	3	2	Experiment	C	7	02Experiment	49.5	5.5	47.5	3	2
499	3	2	Experiment	C	8	02Experiment	17.5	5.5	19.5	3	2
515	3	2	Experiment	C	9	02Experiment	45.5	5.5	43	3	2
531	3	2	Experiment	C	10	02Experiment	46.5	5.5	46	3	2
547	3	2	Experiment	C	11	02Experiment	50.5	5.5	45	3	2
563	3	2	Experiment	C	12	02Experiment	62	5.5	60.5	3	2
579	3	2	Experiment	C	13	02Experiment	52	5.5	45	3	2
595	3	2	Experiment	C	14	02Experiment	51.5	5.5	47	3	2
611	3	2	Experiment	C	15	02Experiment	46	5.5	41	3	2
627	3	2	Experiment	C	16	02Experiment	52.5	5.5	46.5	3	2
643	3	2	Experiment	C	17	02Experiment	50.5	5.5	45.5	3	2
659	3	2	Experiment	C	18	02Experiment	51	5.5	46	3	2
675	3	2	Experiment	C	19	02Experiment	72.5	5.5	67	3	2
691	3	2	Experiment	C	20	02Experiment	53.5	5.5	46.5	3	2
707	3	2	Experiment	C	21	02Experiment	55.5	5.5	48.5	3	2
723	3	2	Experiment	C	22	02Experiment	60.5	5.5	56	3	2
739	3	2	Experiment	C	23	02Experiment	33	5.5	37	3	2
755	3	2	Experiment	C	24	02Experiment	58.5	5.5	60.5	3	2
388	3	2	Experiment	D	1	02Experiment	44.5	7.5	47	4	2
404	3	2	Experiment	D	2	02Experiment	34	7.5	46	4	2
420	3	2	Experiment	D	3	02Experiment	41.5	7.5	41.5	4	2
436	3	2	Experiment	D	4	02Experiment	39	7.5	44	4	2
452	3	2	Experiment	D	5	02Experiment	39	7.5	34	4	2
468	3	2	Experiment	D	6	02Experiment	44.5	7.5	38.5	4	2
484	3	2	Experiment	D	7	02Experiment	46	7.5	42.5	4	2
500	3	2	Experiment	D	8	02Experiment	58.5	7.5	52.5	4	2
516	3	2	Experiment	D	9	02Experiment	36	7.5	45.5	4	2
532	3	2	Experiment	D	10	02Experiment	41	7.5	43.5	4	2
548	3	2	Experiment	D	11	02Experiment	51	7.5	43	4	2
564	3	2	Experiment	D	12	02Experiment	57.5	7.5	44	4	2
580	3	2	Experiment	D	13	02Experiment	32	7.5	31.5	4	2
596	3	2	Experiment	D	14	02Experiment	48.5	7.5	45.5	4	2
612	3	2	Experiment	D	15	02Experiment	50	7.5	44.5	4	2
628	3	2	Experiment	D	16	02Experiment	55	7.5	44.5	4	2
644	3	2	Experiment	D	17	02Experiment	49	7.5	45.5	4	2
660	3	2	Experiment	D	18	02Experiment	36.5	7.5	42.5	4	2
676	3	2	Experiment	D	19	02Experiment	75	7.5	51.5	4	2
692	3	2	Experiment	D	20	02Experiment	46.5	7.5	44	4	2
708	3	2	Experiment	D	21	02Experiment	15.5	7.5	19.5	4	2
724	3	2	Experiment	D	22	02Experiment	46.5	7.5	53	4	2
740	3	2	Experiment	D	23	02Experiment	55.5	7.5	50	4	2
756	3	2	Experiment	D	24	02Experiment	59	7.5	55	4	2
389	3	2	Experiment	E	1	02Experiment	49	9.5	56.5	5	2
405	3	2	Experiment	E	2	02Experiment	39.5	9.5	43	5	2
421	3	2	Experiment	E	3	02Experiment	52.5	9.5	48.5	5	2
437	3	2	Experiment	E	4	02Experiment	31	9.5	18	5	2
453	3	2	Experiment	E	5	02Experiment	37.5	9.5	34.5	5	2
469	3	2	Experiment	E	6	02Experiment	60	9.5	59	5	2
485	3	2	Experiment	E	7	02Experiment	40.5	9.5	40	5	2
501	3	2	Experiment	E	8	02Experiment	36.5	9.5	37	5	2
517	3	2	Experiment	E	9	02Experiment	43	9.5	35.5	5	2
533	3	2	Experiment	E	10	02Experiment	43.5	9.5	40	5	2
549	3	2	Experiment	E	11	02Experiment	58.5	9.5	51.5	5	2
565	3	2	Experiment	E	12	02Experiment	47.5	9.5	38.5	5	2
581	3	2	Experiment	E	13	02Experiment	71	9.5	63.5	5	2
597	3	2	Experiment	E	14	02Experiment	51.5	9.5	45	5	2
613	3	2	Experiment	E	15	02Experiment	30	9.5	22.5	5	2
629	3	2	Experiment	E	16	02Experiment	61.5	9.5	46	5	2
645	3	2	Experiment	E	17	02Experiment	70	9.5	70	5	2
661	3	2	Experiment	E	18	02Experiment	56	9.5	42.5	5	2
677	3	2	Experiment	E	19	02Experiment	47.5	9.5	45	5	2
693	3	2	Experiment	E	20	02Experiment	43.5	9.5	39.5	5	2
709	3	2	Experiment	E	21	02Experiment	45	9.5	44.5	5	2
725	3	2	Experiment	E	22	02Experiment	44	9.5	40	5	2
741	3	2	Experiment	E	23	02Experiment	59	9.5	56.5	5	2
757	3	2	Experiment	E	24	02Experiment	38	9.5	44	5	2
390	3	2	Experiment	F	1	02Experiment	35	11.5	41.5	6	2
406	3	2	Experiment	F	2	02Experiment	35.5	11.5	41.5	6	2
422	3	2	Experiment	F	3	02Experiment	36	11.5	37.5	6	2
438	3	2	Experiment	F	4	02Experiment	37	11.5	41	6	2
454	3	2	Experiment	F	5	02Experiment	38.5	11.5	42.5	6	2
470	3	2	Experiment	F	6	02Experiment	34.5	11.5	38.5	6	2
486	3	2	Experiment	F	7	02Experiment	41	11.5	40	6	2
502	3	2	Experiment	F	8	02Experiment	46.5	11.5	42.5	6	2
518	3	2	Experiment	F	9	02Experiment	3.5	11.5	5.5	6	2
534	3	2	Experiment	F	10	02Experiment	17	11.5	22.5	6	2
550	3	2	Experiment	F	11	02Experiment	51.5	11.5	43.5	6	2
566	3	2	Experiment	F	12	02Experiment	46.5	11.5	39.5	6	2
582	3	2	Experiment	F	13	02Experiment	53	11.5	56	6	2
598	3	2	Experiment	F	14	02Experiment	52	11.5	44	6	2
614	3	2	Experiment	F	15	02Experiment	47.5	11.5	42	6	2
630	3	2	Experiment	F	16	02Experiment	51.5	11.5	44	6	2
646	3	2	Experiment	F	17	02Experiment	38.5	11.5	40.5	6	2
662	3	2	Experiment	F	18	02Experiment	56	11.5	43	6	2
678	3	2	Experiment	F	19	02Experiment	59	11.5	42	6	2
694	3	2	Experiment	F	20	02Experiment	67.5	11.5	48.5	6	2
710	3	2	Experiment	F	21	02Experiment	52.5	11.5	43	6	2
726	3	2	Experiment	F	22	02Experiment	64.5	11.5	57.5	6	2
742	3	2	Experiment	F	23	02Experiment	61	11.5	52.5	6	2
758	3	2	Experiment	F	24	02Experiment	65.5	11.5	51.5	6	2
391	3	2	Experiment	G	1	02Experiment	59.5	13.5	68.5	7	2
407	3	2	Experiment	G	2	02Experiment	36	13.5	36.5	7	2
423	3	2	Experiment	G	3	02Experiment	32.5	13.5	30	7	2
439	3	2	Experiment	G	4	02Experiment	39	13.5	40	7	2
455	3	2	Experiment	G	5	02Experiment	37	13.5	37	7	2
471	3	2	Experiment	G	6	02Experiment	39.5	13.5	38	7	2
487	3	2	Experiment	G	7	02Experiment	49	13.5	39.5	7	2
503	3	2	Experiment	G	8	02Experiment	45.5	13.5	40.5	7	2
519	3	2	Experiment	G	9	02Experiment	41	13.5	31	7	2
535	3	2	Experiment	G	10	02Experiment	38.5	13.5	39	7	2
551	3	2	Experiment	G	11	02Experiment	6	13.5	4.5	7	2
567	3	2	Experiment	G	12	02Experiment	48.5	13.5	43	7	2
583	3	2	Experiment	G	13	02Experiment	43	13.5	39	7	2
599	3	2	Experiment	G	14	02Experiment	59	13.5	53.5	7	2
615	3	2	Experiment	G	15	02Experiment	51.5	13.5	41	7	2
631	3	2	Experiment	G	16	02Experiment	50.5	13.5	40	7	2
647	3	2	Experiment	G	17	02Experiment	49	13.5	42	7	2
663	3	2	Experiment	G	18	02Experiment	51	13.5	42	7	2
679	3	2	Experiment	G	19	02Experiment	61	13.5	43.5	7	2
695	3	2	Experiment	G	20	02Experiment	61	13.5	43	7	2
711	3	2	Experiment	G	21	02Experiment	43.5	13.5	39.5	7	2
727	3	2	Experiment	G	22	02Experiment	48.5	13.5	40	7	2
743	3	2	Experiment	G	23	02Experiment	73	13.5	75.5	7	2
759	3	2	Experiment	G	24	02Experiment	49.5	13.5	45	7	2
392	3	2	Experiment	H	1	02Experiment	44	15.5	51.5	8	2
408	3	2	Experiment	H	2	02Experiment	40	15.5	42.5	8	2
424	3	2	Experiment	H	3	02Experiment	40.5	15.5	36.5	8	2
440	3	2	Experiment	H	4	02Experiment	34	15.5	39	8	2
456	3	2	Experiment	H	5	02Experiment	37	15.5	36	8	2
472	3	2	Experiment	H	6	02Experiment	37.5	15.5	33.5	8	2
488	3	2	Experiment	H	7	02Experiment	45.5	15.5	37	8	2
504	3	2	Experiment	H	8	02Experiment	53.5	15.5	36.5	8	2
520	3	2	Experiment	H	9	02Experiment	54	15.5	40.5	8	2
536	3	2	Experiment	H	10	02Experiment	40	15.5	38.5	8	2
552	3	2	Experiment	H	11	02Experiment	45	15.5	40	8	2
568	3	2	Experiment	H	12	02Experiment	44	15.5	40.5	8	2
584	3	2	Experiment	H	13	02Experiment	60.5	15.5	45	8	2
600	3	2	Experiment	H	14	02Experiment	30	15.5	24.5	8	2
616	3	2	Experiment	H	15	02Experiment	38	15.5	23.5	8	2
632	3	2	Experiment	H	16	02Experiment	40	15.5	39.5	8	2
648	3	2	Experiment	H	17	02Experiment	43	15.5	39	8	2
664	3	2	Experiment	H	18	02Experiment	37	15.5	37	8	2
680	3	2	Experiment	H	19	02Experiment	58	15.5	44	8	2
696	3	2	Experiment	H	20	02Experiment	56	15.5	39.5	8	2
712	3	2	Experiment	H	21	02Experiment	56	15.5	46	8	2
728	3	2	Experiment	H	22	02Experiment	40	15.5	37	8	2
744	3	2	Experiment	H	23	02Experiment	39	15.5	38	8	2
760	3	2	Experiment	H	24	02Experiment	47.5	15.5	43.5	8	2
393	3	2	Experiment	I	1	02Experiment	42.5	17.5	43.5	9	2
409	3	2	Experiment	I	2	02Experiment	34.5	17.5	31	9	2
425	3	2	Experiment	I	3	02Experiment	31	17.5	32.5	9	2
441	3	2	Experiment	I	4	02Experiment	31.5	17.5	34.5	9	2
457	3	2	Experiment	I	5	02Experiment	38.5	17.5	31.5	9	2
473	3	2	Experiment	I	6	02Experiment	38.5	17.5	32.5	9	2
489	3	2	Experiment	I	7	02Experiment	50.5	17.5	42	9	2
505	3	2	Experiment	I	8	02Experiment	42	17.5	36	9	2
521	3	2	Experiment	I	9	02Experiment	54.5	17.5	45	9	2
537	3	2	Experiment	I	10	02Experiment	46.5	17.5	35	9	2
553	3	2	Experiment	I	11	02Experiment	37	17.5	35	9	2
569	3	2	Experiment	I	12	02Experiment	35.5	17.5	37.5	9	2
585	3	2	Experiment	I	13	02Experiment	59.5	17.5	43	9	2
601	3	2	Experiment	I	14	02Experiment	39	17.5	36.5	9	2
617	3	2	Experiment	I	15	02Experiment	16	17.5	13.5	9	2
633	3	2	Experiment	I	16	02Experiment	44	17.5	36.5	9	2
649	3	2	Experiment	I	17	02Experiment	45.5	17.5	36	9	2
665	3	2	Experiment	I	18	02Experiment	41	17.5	38.5	9	2
681	3	2	Experiment	I	19	02Experiment	54	17.5	45.5	9	2
697	3	2	Experiment	I	20	02Experiment	48	17.5	37	9	2
713	3	2	Experiment	I	21	02Experiment	47	17.5	36	9	2
729	3	2	Experiment	I	22	02Experiment	56.5	17.5	41	9	2
745	3	2	Experiment	I	23	02Experiment	11.5	17.5	16.5	9	2
761	3	2	Experiment	I	24	02Experiment	51.5	17.5	55	9	2
394	3	2	Experiment	J	1	02Experiment	44.5	19.5	43	10	2
410	3	2	Experiment	J	2	02Experiment	35	19.5	38.5	10	2
426	3	2	Experiment	J	3	02Experiment	48	19.5	35.5	10	2
442	3	2	Experiment	J	4	02Experiment	36	19.5	36.5	10	2
458	3	2	Experiment	J	5	02Experiment	32	19.5	29.5	10	2
474	3	2	Experiment	J	6	02Experiment	36.5	19.5	33.5	10	2
490	3	2	Experiment	J	7	02Experiment	52	19.5	43	10	2
506	3	2	Experiment	J	8	02Experiment	37.5	19.5	35	10	2
522	3	2	Experiment	J	9	02Experiment	38	19.5	35.5	10	2
538	3	2	Experiment	J	10	02Experiment	36	19.5	34	10	2
554	3	2	Experiment	J	11	02Experiment	38	19.5	36.5	10	2
570	3	2	Experiment	J	12	02Experiment	37	19.5	36	10	2
586	3	2	Experiment	J	13	02Experiment	38	19.5	32.5	10	2
602	3	2	Experiment	J	14	02Experiment	45.5	19.5	35	10	2
618	3	2	Experiment	J	15	02Experiment	35.5	19.5	32	10	2
634	3	2	Experiment	J	16	02Experiment	45	19.5	34.5	10	2
650	3	2	Experiment	J	17	02Experiment	39	19.5	37	10	2
666	3	2	Experiment	J	18	02Experiment	50	19.5	36.5	10	2
682	3	2	Experiment	J	19	02Experiment	56.5	19.5	56	10	2
698	3	2	Experiment	J	20	02Experiment	5	19.5	5	10	2
714	3	2	Experiment	J	21	02Experiment	33	19.5	34.5	10	2
730	3	2	Experiment	J	22	02Experiment	39.5	19.5	34	10	2
746	3	2	Experiment	J	23	02Experiment	37	19.5	32.5	10	2
762	3	2	Experiment	J	24	02Experiment	49	19.5	43.5	10	2
395	3	2	Experiment	K	1	02Experiment	42	21.5	42.5	11	2
411	3	2	Experiment	K	2	02Experiment	38.5	21.5	37	11	2
427	3	2	Experiment	K	3	02Experiment	35	21.5	33.5	11	2
443	3	2	Experiment	K	4	02Experiment	34.5	21.5	31.5	11	2
459	3	2	Experiment	K	5	02Experiment	45	21.5	35.5	11	2
475	3	2	Experiment	K	6	02Experiment	36.5	21.5	32	11	2
491	3	2	Experiment	K	7	02Experiment	44.5	21.5	41	11	2
507	3	2	Experiment	K	8	02Experiment	36.5	21.5	34.5	11	2
523	3	2	Experiment	K	9	02Experiment	37.5	21.5	35.5	11	2
539	3	2	Experiment	K	10	02Experiment	42	21.5	33.5	11	2
555	3	2	Experiment	K	11	02Experiment	38.5	21.5	36.5	11	2
571	3	2	Experiment	K	12	02Experiment	42	21.5	35.5	11	2
587	3	2	Experiment	K	13	02Experiment	37.5	21.5	29.5	11	2
603	3	2	Experiment	K	14	02Experiment	47.5	21.5	32.5	11	2
619	3	2	Experiment	K	15	02Experiment	9.5	21.5	5.5	11	2
635	3	2	Experiment	K	16	02Experiment	50	21.5	38.5	11	2
651	3	2	Experiment	K	17	02Experiment	20	21.5	20	11	2
667	3	2	Experiment	K	18	02Experiment	44.5	21.5	33	11	2
683	3	2	Experiment	K	19	02Experiment	28.5	21.5	24	11	2
699	3	2	Experiment	K	20	02Experiment	42	21.5	35.5	11	2
715	3	2	Experiment	K	21	02Experiment	31.5	21.5	26.5	11	2
731	3	2	Experiment	K	22	02Experiment	47.5	21.5	38.5	11	2
747	3	2	Experiment	K	23	02Experiment	36	21.5	36.5	11	2
763	3	2	Experiment	K	24	02Experiment	38.5	21.5	45	11	2
396	3	2	Experiment	L	1	02Experiment	39	23.5	41.5	12	2
412	3	2	Experiment	L	2	02Experiment	31	23.5	35.5	12	2
428	3	2	Experiment	L	3	02Experiment	32	23.5	32	12	2
444	3	2	Experiment	L	4	02Experiment	34	23.5	32	12	2
460	3	2	Experiment	L	5	02Experiment	31.5	23.5	31.5	12	2
476	3	2	Experiment	L	6	02Experiment	38.5	23.5	30	12	2
492	3	2	Experiment	L	7	02Experiment	36.5	23.5	31	12	2
508	3	2	Experiment	L	8	02Experiment	32.5	23.5	34.5	12	2
524	3	2	Experiment	L	9	02Experiment	47.5	23.5	39	12	2
540	3	2	Experiment	L	10	02Experiment	38.5	23.5	32	12	2
556	3	2	Experiment	L	11	02Experiment	19	23.5	23	12	2
572	3	2	Experiment	L	12	02Experiment	48.5	23.5	36	12	2
588	3	2	Experiment	L	13	02Experiment	19	23.5	27.5	12	2
604	3	2	Experiment	L	14	02Experiment	24	23.5	25.5	12	2
620	3	2	Experiment	L	15	02Experiment	43.5	23.5	36	12	2
636	3	2	Experiment	L	16	02Experiment	0	23.5	0	12	2
652	3	2	Experiment	L	17	02Experiment	43	23.5	37.5	12	2
668	3	2	Experiment	L	18	02Experiment	14	23.5	15.5	12	2
684	3	2	Experiment	L	19	02Experiment	46.5	23.5	40.5	12	2
700	3	2	Experiment	L	20	02Experiment	0	23.5	0	12	2
716	3	2	Experiment	L	21	02Experiment	34.5	23.5	36.5	12	2
732	3	2	Experiment	L	22	02Experiment	0	23.5	2	12	2
748	3	2	Experiment	L	23	02Experiment	41	23.5	42.5	12	2
764	3	2	Experiment	L	24	02Experiment	45.5	23.5	44	12	2
397	3	2	Experiment	M	1	02Experiment	35.5	25.5	37	13	2
413	3	2	Experiment	M	2	02Experiment	33	25.5	32.5	13	2
429	3	2	Experiment	M	3	02Experiment	36	25.5	39	13	2
445	3	2	Experiment	M	4	02Experiment	29	25.5	33	13	2
461	3	2	Experiment	M	5	02Experiment	42	25.5	34.5	13	2
477	3	2	Experiment	M	6	02Experiment	31.5	25.5	31	13	2
493	3	2	Experiment	M	7	02Experiment	36	25.5	35	13	2
509	3	2	Experiment	M	8	02Experiment	46.5	25.5	43	13	2
525	3	2	Experiment	M	9	02Experiment	41	25.5	35	13	2
541	3	2	Experiment	M	10	02Experiment	41	25.5	33	13	2
557	3	2	Experiment	M	11	02Experiment	40	25.5	39.5	13	2
573	3	2	Experiment	M	12	02Experiment	40.5	25.5	39	13	2
589	3	2	Experiment	M	13	02Experiment	38	25.5	34.5	13	2
605	3	2	Experiment	M	14	02Experiment	42.5	25.5	36.5	13	2
621	3	2	Experiment	M	15	02Experiment	41.5	25.5	35.5	13	2
637	3	2	Experiment	M	16	02Experiment	45	25.5	34	13	2
653	3	2	Experiment	M	17	02Experiment	39.5	25.5	36.5	13	2
669	3	2	Experiment	M	18	02Experiment	43	25.5	35	13	2
685	3	2	Experiment	M	19	02Experiment	35.5	25.5	33	13	2
701	3	2	Experiment	M	20	02Experiment	41	25.5	32.5	13	2
717	3	2	Experiment	M	21	02Experiment	40	25.5	37	13	2
733	3	2	Experiment	M	22	02Experiment	41	25.5	32.5	13	2
749	3	2	Experiment	M	23	02Experiment	42.5	25.5	38	13	2
765	3	2	Experiment	M	24	02Experiment	31	25.5	40.5	13	2
398	3	2	Experiment	N	1	02Experiment	32.5	27.5	32	14	2
414	3	2	Experiment	N	2	02Experiment	39	27.5	25	14	2
430	3	2	Experiment	N	3	02Experiment	38.5	27.5	15	14	2
446	3	2	Experiment	N	4	02Experiment	39.5	27.5	25	14	2
462	3	2	Experiment	N	5	02Experiment	41.5	27.5	33	14	2
478	3	2	Experiment	N	6	02Experiment	38	27.5	29	14	2
494	3	2	Experiment	N	7	02Experiment	35.5	27.5	36	14	2
510	3	2	Experiment	N	8	02Experiment	37.5	27.5	35	14	2
526	3	2	Experiment	N	9	02Experiment	36.5	27.5	30	14	2
542	3	2	Experiment	N	10	02Experiment	37	27.5	33.5	14	2
558	3	2	Experiment	N	11	02Experiment	35	27.5	30.5	14	2
574	3	2	Experiment	N	12	02Experiment	39	27.5	35	14	2
590	3	2	Experiment	N	13	02Experiment	13	27.5	16.5	14	2
606	3	2	Experiment	N	14	02Experiment	3.5	27.5	7	14	2
622	3	2	Experiment	N	15	02Experiment	42	27.5	34	14	2
638	3	2	Experiment	N	16	02Experiment	46.5	27.5	36	14	2
654	3	2	Experiment	N	17	02Experiment	40	27.5	34.5	14	2
670	3	2	Experiment	N	18	02Experiment	39.5	27.5	33.5	14	2
686	3	2	Experiment	N	19	02Experiment	38	27.5	34.5	14	2
702	3	2	Experiment	N	20	02Experiment	38.5	27.5	34	14	2
718	3	2	Experiment	N	21	02Experiment	39	27.5	32.5	14	2
734	3	2	Experiment	N	22	02Experiment	40	27.5	34.5	14	2
750	3	2	Experiment	N	23	02Experiment	38	27.5	37.5	14	2
766	3	2	Experiment	N	24	02Experiment	49.5	27.5	47	14	2
399	3	2	Experiment	O	1	02Experiment	11.5	29.5	11	15	2
415	3	2	Experiment	O	2	02Experiment	32.5	29.5	26.5	15	2
431	3	2	Experiment	O	3	02Experiment	32.5	29.5	22.5	15	2
447	3	2	Experiment	O	4	02Experiment	24.5	29.5	22.5	15	2
463	3	2	Experiment	O	5	02Experiment	32.5	29.5	17	15	2
479	3	2	Experiment	O	6	02Experiment	38	29.5	33	15	2
495	3	2	Experiment	O	7	02Experiment	39	29.5	28	15	2
511	3	2	Experiment	O	8	02Experiment	38	29.5	31	15	2
527	3	2	Experiment	O	9	02Experiment	40	29.5	39.5	15	2
543	3	2	Experiment	O	10	02Experiment	39	29.5	33	15	2
559	3	2	Experiment	O	11	02Experiment	40.5	29.5	38	15	2
575	3	2	Experiment	O	12	02Experiment	37.5	29.5	30.5	15	2
591	3	2	Experiment	O	13	02Experiment	33	29.5	29	15	2
607	3	2	Experiment	O	14	02Experiment	36.5	29.5	32	15	2
623	3	2	Experiment	O	15	02Experiment	39.5	29.5	34	15	2
639	3	2	Experiment	O	16	02Experiment	44	29.5	34	15	2
655	3	2	Experiment	O	17	02Experiment	39	29.5	42	15	2
671	3	2	Experiment	O	18	02Experiment	34.5	29.5	28.5	15	2
687	3	2	Experiment	O	19	02Experiment	42	29.5	36	15	2
703	3	2	Experiment	O	20	02Experiment	19	29.5	19	15	2
719	3	2	Experiment	O	21	02Experiment	39.5	29.5	39	15	2
735	3	2	Experiment	O	22	02Experiment	26	29.5	22	15	2
751	3	2	Experiment	O	23	02Experiment	43	29.5	42	15	2
767	3	2	Experiment	O	24	02Experiment	49.5	29.5	48	15	2
400	3	2	Experiment	P	1	02Experiment	52	31.5	52	16	2
416	3	2	Experiment	P	2	02Experiment	50	31.5	42.5	16	2
432	3	2	Experiment	P	3	02Experiment	52	31.5	40.5	16	2
448	3	2	Experiment	P	4	02Experiment	49	31.5	43.5	16	2
464	3	2	Experiment	P	5	02Experiment	44	31.5	42	16	2
480	3	2	Experiment	P	6	02Experiment	43.5	31.5	39.5	16	2
496	3	2	Experiment	P	7	02Experiment	42	31.5	42	16	2
512	3	2	Experiment	P	8	02Experiment	47.5	31.5	45.5	16	2
528	3	2	Experiment	P	9	02Experiment	4	31.5	19	16	2
544	3	2	Experiment	P	10	02Experiment	53.5	31.5	51	16	2
560	3	2	Experiment	P	11	02Experiment	54	31.5	45	16	2
576	3	2	Experiment	P	12	02Experiment	60	31.5	52.5	16	2
592	3	2	Experiment	P	13	02Experiment	11	31.5	11.5	16	2
608	3	2	Experiment	P	14	02Experiment	44	31.5	44.5	16	2
624	3	2	Experiment	P	15	02Experiment	48	31.5	54	16	2
640	3	2	Experiment	P	16	02Experiment	53.5	31.5	47.5	16	2
656	3	2	Experiment	P	17	02Experiment	49	31.5	40.5	16	2
672	3	2	Experiment	P	18	02Experiment	52	31.5	44	16	2
688	3	2	Experiment	P	19	02Experiment	25	31.5	26.5	16	2
704	3	2	Experiment	P	20	02Experiment	54	31.5	47	16	2
720	3	2	Experiment	P	21	02Experiment	51.5	31.5	57	16	2
736	3	2	Experiment	P	22	02Experiment	50	31.5	49.5	16	2
752	3	2	Experiment	P	23	02Experiment	13.5	31.5	27	16	2
768	3	2	Experiment	P	24	02Experiment	59	31.5	49	16	2
769	3	3	Experiment	A	1	03Experiment	27.5	1.5	51.5	1	3
785	3	3	Experiment	A	2	03Experiment	29	1.5	58	1	3
801	3	3	Experiment	A	3	03Experiment	30.5	1.5	51	1	3
817	3	3	Experiment	A	4	03Experiment	32	1.5	50.5	1	3
833	3	3	Experiment	A	5	03Experiment	60	1.5	65.5	1	3
849	3	3	Experiment	A	6	03Experiment	39.5	1.5	56	1	3
865	3	3	Experiment	A	7	03Experiment	49	1.5	68	1	3
881	3	3	Experiment	A	8	03Experiment	38	1.5	50	1	3
897	3	3	Experiment	A	9	03Experiment	30.5	1.5	39.5	1	3
913	3	3	Experiment	A	10	03Experiment	41	1.5	48	1	3
929	3	3	Experiment	A	11	03Experiment	39.5	1.5	56	1	3
945	3	3	Experiment	A	12	03Experiment	57	1.5	66.5	1	3
961	3	3	Experiment	A	13	03Experiment	46.5	1.5	58.5	1	3
977	3	3	Experiment	A	14	03Experiment	43.5	1.5	60	1	3
993	3	3	Experiment	A	15	03Experiment	42.5	1.5	56.5	1	3
1009	3	3	Experiment	A	16	03Experiment	46.5	1.5	58.5	1	3
1025	3	3	Experiment	A	17	03Experiment	42.5	1.5	55	1	3
1041	3	3	Experiment	A	18	03Experiment	62.5	1.5	87.5	1	3
1057	3	3	Experiment	A	19	03Experiment	41.5	1.5	52.5	1	3
1073	3	3	Experiment	A	20	03Experiment	45	1.5	55	1	3
1089	3	3	Experiment	A	21	03Experiment	50.5	1.5	59	1	3
1105	3	3	Experiment	A	22	03Experiment	53	1.5	59.5	1	3
1121	3	3	Experiment	A	23	03Experiment	45	1.5	60.5	1	3
1137	3	3	Experiment	A	24	03Experiment	62.5	1.5	75.5	1	3
770	3	3	Experiment	B	1	03Experiment	31	3.5	52.5	2	3
786	3	3	Experiment	B	2	03Experiment	28	3.5	38.5	2	3
802	3	3	Experiment	B	3	03Experiment	32.5	3.5	38	2	3
818	3	3	Experiment	B	4	03Experiment	41.5	3.5	65	2	3
834	3	3	Experiment	B	5	03Experiment	31.5	3.5	44.5	2	3
850	3	3	Experiment	B	6	03Experiment	35.5	3.5	47	2	3
866	3	3	Experiment	B	7	03Experiment	36	3.5	47	2	3
882	3	3	Experiment	B	8	03Experiment	34.5	3.5	50.5	2	3
898	3	3	Experiment	B	9	03Experiment	27.5	3.5	33.5	2	3
914	3	3	Experiment	B	10	03Experiment	37.5	3.5	30.5	2	3
930	3	3	Experiment	B	11	03Experiment	37.5	3.5	51	2	3
946	3	3	Experiment	B	12	03Experiment	40	3.5	50.5	2	3
962	3	3	Experiment	B	13	03Experiment	50.5	3.5	63.5	2	3
978	3	3	Experiment	B	14	03Experiment	38	3.5	49	2	3
994	3	3	Experiment	B	15	03Experiment	39	3.5	47.5	2	3
1010	3	3	Experiment	B	16	03Experiment	42.5	3.5	48.5	2	3
1026	3	3	Experiment	B	17	03Experiment	39	3.5	39.5	2	3
1042	3	3	Experiment	B	18	03Experiment	41.5	3.5	49	2	3
1058	3	3	Experiment	B	19	03Experiment	39	3.5	49.5	2	3
1074	3	3	Experiment	B	20	03Experiment	40.5	3.5	48.5	2	3
1090	3	3	Experiment	B	21	03Experiment	48	3.5	55.5	2	3
1106	3	3	Experiment	B	22	03Experiment	46.5	3.5	52	2	3
1122	3	3	Experiment	B	23	03Experiment	45.5	3.5	55	2	3
1138	3	3	Experiment	B	24	03Experiment	50	3.5	59.5	2	3
771	3	3	Experiment	C	1	03Experiment	29.5	5.5	50.5	3	3
787	3	3	Experiment	C	2	03Experiment	27	5.5	44.5	3	3
803	3	3	Experiment	C	3	03Experiment	29.5	5.5	42.5	3	3
819	3	3	Experiment	C	4	03Experiment	25	5.5	33.5	3	3
835	3	3	Experiment	C	5	03Experiment	56.5	5.5	59.5	3	3
851	3	3	Experiment	C	6	03Experiment	39	5.5	50	3	3
867	3	3	Experiment	C	7	03Experiment	35	5.5	47.5	3	3
883	3	3	Experiment	C	8	03Experiment	22.5	5.5	19.5	3	3
899	3	3	Experiment	C	9	03Experiment	43	5.5	43	3	3
915	3	3	Experiment	C	10	03Experiment	35.5	5.5	46	3	3
931	3	3	Experiment	C	11	03Experiment	36	5.5	45	3	3
947	3	3	Experiment	C	12	03Experiment	59	5.5	60.5	3	3
963	3	3	Experiment	C	13	03Experiment	36	5.5	45	3	3
979	3	3	Experiment	C	14	03Experiment	21.5	5.5	47	3	3
995	3	3	Experiment	C	15	03Experiment	44.5	5.5	41	3	3
1011	3	3	Experiment	C	16	03Experiment	40	5.5	46.5	3	3
1027	3	3	Experiment	C	17	03Experiment	35.5	5.5	45.5	3	3
1043	3	3	Experiment	C	18	03Experiment	40.5	5.5	46	3	3
1059	3	3	Experiment	C	19	03Experiment	42	5.5	67	3	3
1075	3	3	Experiment	C	20	03Experiment	42	5.5	46.5	3	3
1091	3	3	Experiment	C	21	03Experiment	39.5	5.5	48.5	3	3
1107	3	3	Experiment	C	22	03Experiment	44.5	5.5	56	3	3
1123	3	3	Experiment	C	23	03Experiment	31	5.5	37	3	3
1139	3	3	Experiment	C	24	03Experiment	54	5.5	60.5	3	3
772	3	3	Experiment	D	1	03Experiment	31	7.5	47	4	3
788	3	3	Experiment	D	2	03Experiment	30	7.5	46	4	3
804	3	3	Experiment	D	3	03Experiment	31.5	7.5	41.5	4	3
820	3	3	Experiment	D	4	03Experiment	25	7.5	44	4	3
836	3	3	Experiment	D	5	03Experiment	27	7.5	34	4	3
852	3	3	Experiment	D	6	03Experiment	33.5	7.5	38.5	4	3
868	3	3	Experiment	D	7	03Experiment	32	7.5	42.5	4	3
884	3	3	Experiment	D	8	03Experiment	29.5	7.5	52.5	4	3
900	3	3	Experiment	D	9	03Experiment	42	7.5	45.5	4	3
916	3	3	Experiment	D	10	03Experiment	30	7.5	43.5	4	3
932	3	3	Experiment	D	11	03Experiment	35.5	7.5	43	4	3
948	3	3	Experiment	D	12	03Experiment	35	7.5	44	4	3
964	3	3	Experiment	D	13	03Experiment	28	7.5	31.5	4	3
980	3	3	Experiment	D	14	03Experiment	35	7.5	45.5	4	3
996	3	3	Experiment	D	15	03Experiment	35	7.5	44.5	4	3
1012	3	3	Experiment	D	16	03Experiment	35.5	7.5	44.5	4	3
1028	3	3	Experiment	D	17	03Experiment	34	7.5	45.5	4	3
1044	3	3	Experiment	D	18	03Experiment	36	7.5	42.5	4	3
1060	3	3	Experiment	D	19	03Experiment	38	7.5	51.5	4	3
1076	3	3	Experiment	D	20	03Experiment	36	7.5	44	4	3
1092	3	3	Experiment	D	21	03Experiment	13	7.5	19.5	4	3
1108	3	3	Experiment	D	22	03Experiment	46	7.5	53	4	3
1124	3	3	Experiment	D	23	03Experiment	36	7.5	50	4	3
1140	3	3	Experiment	D	24	03Experiment	47	7.5	55	4	3
773	3	3	Experiment	E	1	03Experiment	46.5	9.5	56.5	5	3
789	3	3	Experiment	E	2	03Experiment	28	9.5	43	5	3
805	3	3	Experiment	E	3	03Experiment	36	9.5	48.5	5	3
821	3	3	Experiment	E	4	03Experiment	23	9.5	18	5	3
837	3	3	Experiment	E	5	03Experiment	33	9.5	34.5	5	3
853	3	3	Experiment	E	6	03Experiment	48	9.5	59	5	3
869	3	3	Experiment	E	7	03Experiment	27.5	9.5	40	5	3
885	3	3	Experiment	E	8	03Experiment	28.5	9.5	37	5	3
901	3	3	Experiment	E	9	03Experiment	27.5	9.5	35.5	5	3
917	3	3	Experiment	E	10	03Experiment	32	9.5	40	5	3
933	3	3	Experiment	E	11	03Experiment	45.5	9.5	51.5	5	3
949	3	3	Experiment	E	12	03Experiment	34.5	9.5	38.5	5	3
965	3	3	Experiment	E	13	03Experiment	50.5	9.5	63.5	5	3
981	3	3	Experiment	E	14	03Experiment	40	9.5	45	5	3
997	3	3	Experiment	E	15	03Experiment	27.5	9.5	22.5	5	3
1013	3	3	Experiment	E	16	03Experiment	39	9.5	46	5	3
1029	3	3	Experiment	E	17	03Experiment	51.5	9.5	70	5	3
1045	3	3	Experiment	E	18	03Experiment	37.5	9.5	42.5	5	3
1061	3	3	Experiment	E	19	03Experiment	30.5	9.5	45	5	3
1077	3	3	Experiment	E	20	03Experiment	32	9.5	39.5	5	3
1093	3	3	Experiment	E	21	03Experiment	37	9.5	44.5	5	3
1109	3	3	Experiment	E	22	03Experiment	38.5	9.5	40	5	3
1125	3	3	Experiment	E	23	03Experiment	43	9.5	56.5	5	3
1141	3	3	Experiment	E	24	03Experiment	42.5	9.5	44	5	3
774	3	3	Experiment	F	1	03Experiment	27.5	11.5	41.5	6	3
790	3	3	Experiment	F	2	03Experiment	25.5	11.5	41.5	6	3
806	3	3	Experiment	F	3	03Experiment	24.5	11.5	37.5	6	3
822	3	3	Experiment	F	4	03Experiment	25	11.5	41	6	3
838	3	3	Experiment	F	5	03Experiment	24	11.5	42.5	6	3
854	3	3	Experiment	F	6	03Experiment	25.5	11.5	38.5	6	3
870	3	3	Experiment	F	7	03Experiment	28	11.5	40	6	3
886	3	3	Experiment	F	8	03Experiment	33	11.5	42.5	6	3
902	3	3	Experiment	F	9	03Experiment	4.5	11.5	5.5	6	3
918	3	3	Experiment	F	10	03Experiment	17.5	11.5	22.5	6	3
934	3	3	Experiment	F	11	03Experiment	32	11.5	43.5	6	3
950	3	3	Experiment	F	12	03Experiment	29	11.5	39.5	6	3
966	3	3	Experiment	F	13	03Experiment	53.5	11.5	56	6	3
982	3	3	Experiment	F	14	03Experiment	30	11.5	44	6	3
998	3	3	Experiment	F	15	03Experiment	29	11.5	42	6	3
1014	3	3	Experiment	F	16	03Experiment	30	11.5	44	6	3
1030	3	3	Experiment	F	17	03Experiment	25.5	11.5	40.5	6	3
1046	3	3	Experiment	F	18	03Experiment	33	11.5	43	6	3
1062	3	3	Experiment	F	19	03Experiment	30	11.5	42	6	3
1078	3	3	Experiment	F	20	03Experiment	42	11.5	48.5	6	3
1094	3	3	Experiment	F	21	03Experiment	31	11.5	43	6	3
1110	3	3	Experiment	F	22	03Experiment	45	11.5	57.5	6	3
1126	3	3	Experiment	F	23	03Experiment	36	11.5	52.5	6	3
1142	3	3	Experiment	F	24	03Experiment	42.5	11.5	51.5	6	3
775	3	3	Experiment	G	1	03Experiment	40	13.5	68.5	7	3
791	3	3	Experiment	G	2	03Experiment	23.5	13.5	36.5	7	3
807	3	3	Experiment	G	3	03Experiment	26.5	13.5	30	7	3
823	3	3	Experiment	G	4	03Experiment	25.5	13.5	40	7	3
839	3	3	Experiment	G	5	03Experiment	25	13.5	37	7	3
855	3	3	Experiment	G	6	03Experiment	26	13.5	38	7	3
871	3	3	Experiment	G	7	03Experiment	29.5	13.5	39.5	7	3
887	3	3	Experiment	G	8	03Experiment	27	13.5	40.5	7	3
903	3	3	Experiment	G	9	03Experiment	25.5	13.5	31	7	3
919	3	3	Experiment	G	10	03Experiment	29.5	13.5	39	7	3
935	3	3	Experiment	G	11	03Experiment	2	13.5	4.5	7	3
951	3	3	Experiment	G	12	03Experiment	30	13.5	43	7	3
967	3	3	Experiment	G	13	03Experiment	28.5	13.5	39	7	3
983	3	3	Experiment	G	14	03Experiment	34.5	13.5	53.5	7	3
999	3	3	Experiment	G	15	03Experiment	30	13.5	41	7	3
1015	3	3	Experiment	G	16	03Experiment	32	13.5	40	7	3
1031	3	3	Experiment	G	17	03Experiment	31	13.5	42	7	3
1047	3	3	Experiment	G	18	03Experiment	31.5	13.5	42	7	3
1063	3	3	Experiment	G	19	03Experiment	28	13.5	43.5	7	3
1079	3	3	Experiment	G	20	03Experiment	37.5	13.5	43	7	3
1095	3	3	Experiment	G	21	03Experiment	30	13.5	39.5	7	3
1111	3	3	Experiment	G	22	03Experiment	36.5	13.5	40	7	3
1127	3	3	Experiment	G	23	03Experiment	40	13.5	75.5	7	3
1143	3	3	Experiment	G	24	03Experiment	43	13.5	45	7	3
776	3	3	Experiment	H	1	03Experiment	31.5	15.5	51.5	8	3
792	3	3	Experiment	H	2	03Experiment	21.5	15.5	42.5	8	3
808	3	3	Experiment	H	3	03Experiment	28.5	15.5	36.5	8	3
824	3	3	Experiment	H	4	03Experiment	25	15.5	39	8	3
840	3	3	Experiment	H	5	03Experiment	26	15.5	36	8	3
856	3	3	Experiment	H	6	03Experiment	23	15.5	33.5	8	3
872	3	3	Experiment	H	7	03Experiment	24.5	15.5	37	8	3
888	3	3	Experiment	H	8	03Experiment	25	15.5	36.5	8	3
904	3	3	Experiment	H	9	03Experiment	28	15.5	40.5	8	3
920	3	3	Experiment	H	10	03Experiment	28.5	15.5	38.5	8	3
936	3	3	Experiment	H	11	03Experiment	30.5	15.5	40	8	3
952	3	3	Experiment	H	12	03Experiment	28	15.5	40.5	8	3
968	3	3	Experiment	H	13	03Experiment	38.5	15.5	45	8	3
984	3	3	Experiment	H	14	03Experiment	20	15.5	24.5	8	3
1000	3	3	Experiment	H	15	03Experiment	21	15.5	23.5	8	3
1016	3	3	Experiment	H	16	03Experiment	31.5	15.5	39.5	8	3
1032	3	3	Experiment	H	17	03Experiment	27	15.5	39	8	3
1048	3	3	Experiment	H	18	03Experiment	30	15.5	37	8	3
1064	3	3	Experiment	H	19	03Experiment	30	15.5	44	8	3
1080	3	3	Experiment	H	20	03Experiment	32.5	15.5	39.5	8	3
1096	3	3	Experiment	H	21	03Experiment	36.5	15.5	46	8	3
1112	3	3	Experiment	H	22	03Experiment	33.5	15.5	37	8	3
1128	3	3	Experiment	H	23	03Experiment	33	15.5	38	8	3
1144	3	3	Experiment	H	24	03Experiment	39	15.5	43.5	8	3
777	3	3	Experiment	I	1	03Experiment	29	17.5	43.5	9	3
793	3	3	Experiment	I	2	03Experiment	27	17.5	31	9	3
809	3	3	Experiment	I	3	03Experiment	25.5	17.5	32.5	9	3
825	3	3	Experiment	I	4	03Experiment	25	17.5	34.5	9	3
841	3	3	Experiment	I	5	03Experiment	29.5	17.5	31.5	9	3
857	3	3	Experiment	I	6	03Experiment	22	17.5	32.5	9	3
873	3	3	Experiment	I	7	03Experiment	31.5	17.5	42	9	3
889	3	3	Experiment	I	8	03Experiment	26	17.5	36	9	3
905	3	3	Experiment	I	9	03Experiment	37.5	17.5	45	9	3
921	3	3	Experiment	I	10	03Experiment	29	17.5	35	9	3
937	3	3	Experiment	I	11	03Experiment	22.5	17.5	35	9	3
953	3	3	Experiment	I	12	03Experiment	30.5	17.5	37.5	9	3
969	3	3	Experiment	I	13	03Experiment	35.5	17.5	43	9	3
985	3	3	Experiment	I	14	03Experiment	30	17.5	36.5	9	3
1001	3	3	Experiment	I	15	03Experiment	11	17.5	13.5	9	3
1017	3	3	Experiment	I	16	03Experiment	30.5	17.5	36.5	9	3
1033	3	3	Experiment	I	17	03Experiment	31.5	17.5	36	9	3
1049	3	3	Experiment	I	18	03Experiment	32.5	17.5	38.5	9	3
1065	3	3	Experiment	I	19	03Experiment	35.5	17.5	45.5	9	3
1081	3	3	Experiment	I	20	03Experiment	27	17.5	37	9	3
1097	3	3	Experiment	I	21	03Experiment	33.5	17.5	36	9	3
1113	3	3	Experiment	I	22	03Experiment	35	17.5	41	9	3
1129	3	3	Experiment	I	23	03Experiment	15.5	17.5	16.5	9	3
1145	3	3	Experiment	I	24	03Experiment	44	17.5	55	9	3
778	3	3	Experiment	J	1	03Experiment	30.5	19.5	43	10	3
794	3	3	Experiment	J	2	03Experiment	24	19.5	38.5	10	3
810	3	3	Experiment	J	3	03Experiment	33.5	19.5	35.5	10	3
826	3	3	Experiment	J	4	03Experiment	22	19.5	36.5	10	3
842	3	3	Experiment	J	5	03Experiment	23	19.5	29.5	10	3
858	3	3	Experiment	J	6	03Experiment	24	19.5	33.5	10	3
874	3	3	Experiment	J	7	03Experiment	37	19.5	43	10	3
890	3	3	Experiment	J	8	03Experiment	27	19.5	35	10	3
906	3	3	Experiment	J	9	03Experiment	29.5	19.5	35.5	10	3
922	3	3	Experiment	J	10	03Experiment	24.5	19.5	34	10	3
938	3	3	Experiment	J	11	03Experiment	31	19.5	36.5	10	3
954	3	3	Experiment	J	12	03Experiment	26	19.5	36	10	3
970	3	3	Experiment	J	13	03Experiment	25.5	19.5	32.5	10	3
986	3	3	Experiment	J	14	03Experiment	28.5	19.5	35	10	3
1002	3	3	Experiment	J	15	03Experiment	33.5	19.5	32	10	3
1018	3	3	Experiment	J	16	03Experiment	26.5	19.5	34.5	10	3
1034	3	3	Experiment	J	17	03Experiment	29.5	19.5	37	10	3
1050	3	3	Experiment	J	18	03Experiment	31.5	19.5	36.5	10	3
1066	3	3	Experiment	J	19	03Experiment	46	19.5	56	10	3
1082	3	3	Experiment	J	20	03Experiment	0	19.5	5	10	3
1098	3	3	Experiment	J	21	03Experiment	0	19.5	34.5	10	3
1114	3	3	Experiment	J	22	03Experiment	28.5	19.5	34	10	3
1130	3	3	Experiment	J	23	03Experiment	32.5	19.5	32.5	10	3
1146	3	3	Experiment	J	24	03Experiment	40	19.5	43.5	10	3
779	3	3	Experiment	K	1	03Experiment	33	21.5	42.5	11	3
795	3	3	Experiment	K	2	03Experiment	26.5	21.5	37	11	3
811	3	3	Experiment	K	3	03Experiment	29	21.5	33.5	11	3
827	3	3	Experiment	K	4	03Experiment	22	21.5	31.5	11	3
843	3	3	Experiment	K	5	03Experiment	29	21.5	35.5	11	3
859	3	3	Experiment	K	6	03Experiment	24.5	21.5	32	11	3
875	3	3	Experiment	K	7	03Experiment	27	21.5	41	11	3
891	3	3	Experiment	K	8	03Experiment	27.5	21.5	34.5	11	3
907	3	3	Experiment	K	9	03Experiment	28	21.5	35.5	11	3
923	3	3	Experiment	K	10	03Experiment	24.5	21.5	33.5	11	3
939	3	3	Experiment	K	11	03Experiment	27.5	21.5	36.5	11	3
955	3	3	Experiment	K	12	03Experiment	30	21.5	35.5	11	3
971	3	3	Experiment	K	13	03Experiment	28	21.5	29.5	11	3
987	3	3	Experiment	K	14	03Experiment	28	21.5	32.5	11	3
1003	3	3	Experiment	K	15	03Experiment	6.5	21.5	5.5	11	3
1019	3	3	Experiment	K	16	03Experiment	33.5	21.5	38.5	11	3
1035	3	3	Experiment	K	17	03Experiment	16	21.5	20	11	3
1051	3	3	Experiment	K	18	03Experiment	29	21.5	33	11	3
1067	3	3	Experiment	K	19	03Experiment	23.5	21.5	24	11	3
1083	3	3	Experiment	K	20	03Experiment	32	21.5	35.5	11	3
1099	3	3	Experiment	K	21	03Experiment	25.5	21.5	26.5	11	3
1115	3	3	Experiment	K	22	03Experiment	39	21.5	38.5	11	3
1131	3	3	Experiment	K	23	03Experiment	34.5	21.5	36.5	11	3
1147	3	3	Experiment	K	24	03Experiment	34	21.5	45	11	3
780	3	3	Experiment	L	1	03Experiment	26.5	23.5	41.5	12	3
796	3	3	Experiment	L	2	03Experiment	17	23.5	35.5	12	3
812	3	3	Experiment	L	3	03Experiment	23	23.5	32	12	3
828	3	3	Experiment	L	4	03Experiment	21	23.5	32	12	3
844	3	3	Experiment	L	5	03Experiment	25.5	23.5	31.5	12	3
860	3	3	Experiment	L	6	03Experiment	23.5	23.5	30	12	3
876	3	3	Experiment	L	7	03Experiment	23	23.5	31	12	3
892	3	3	Experiment	L	8	03Experiment	24	23.5	34.5	12	3
908	3	3	Experiment	L	9	03Experiment	32	23.5	39	12	3
924	3	3	Experiment	L	10	03Experiment	30.5	23.5	32	12	3
940	3	3	Experiment	L	11	03Experiment	13.5	23.5	23	12	3
956	3	3	Experiment	L	12	03Experiment	29.5	23.5	36	12	3
972	3	3	Experiment	L	13	03Experiment	20	23.5	27.5	12	3
988	3	3	Experiment	L	14	03Experiment	18	23.5	25.5	12	3
1004	3	3	Experiment	L	15	03Experiment	27	23.5	36	12	3
1020	3	3	Experiment	L	16	03Experiment	0	23.5	0	12	3
1036	3	3	Experiment	L	17	03Experiment	28	23.5	37.5	12	3
1052	3	3	Experiment	L	18	03Experiment	14.5	23.5	15.5	12	3
1068	3	3	Experiment	L	19	03Experiment	38	23.5	40.5	12	3
1084	3	3	Experiment	L	20	03Experiment	0	23.5	0	12	3
1100	3	3	Experiment	L	21	03Experiment	26	23.5	36.5	12	3
1116	3	3	Experiment	L	22	03Experiment	0	23.5	2	12	3
1132	3	3	Experiment	L	23	03Experiment	36	23.5	42.5	12	3
1148	3	3	Experiment	L	24	03Experiment	41	23.5	44	12	3
781	3	3	Experiment	M	1	03Experiment	23.5	25.5	37	13	3
797	3	3	Experiment	M	2	03Experiment	18.5	25.5	32.5	13	3
813	3	3	Experiment	M	3	03Experiment	28	25.5	39	13	3
829	3	3	Experiment	M	4	03Experiment	22	25.5	33	13	3
845	3	3	Experiment	M	5	03Experiment	28	25.5	34.5	13	3
861	3	3	Experiment	M	6	03Experiment	20.5	25.5	31	13	3
877	3	3	Experiment	M	7	03Experiment	26	25.5	35	13	3
893	3	3	Experiment	M	8	03Experiment	32	25.5	43	13	3
909	3	3	Experiment	M	9	03Experiment	27.5	25.5	35	13	3
925	3	3	Experiment	M	10	03Experiment	24	25.5	33	13	3
941	3	3	Experiment	M	11	03Experiment	40.5	25.5	39.5	13	3
957	3	3	Experiment	M	12	03Experiment	33	25.5	39	13	3
973	3	3	Experiment	M	13	03Experiment	25	25.5	34.5	13	3
989	3	3	Experiment	M	14	03Experiment	30	25.5	36.5	13	3
1005	3	3	Experiment	M	15	03Experiment	28	25.5	35.5	13	3
1021	3	3	Experiment	M	16	03Experiment	31.5	25.5	34	13	3
1037	3	3	Experiment	M	17	03Experiment	26.5	25.5	36.5	13	3
1053	3	3	Experiment	M	18	03Experiment	28	25.5	35	13	3
1069	3	3	Experiment	M	19	03Experiment	23.5	25.5	33	13	3
1085	3	3	Experiment	M	20	03Experiment	29.5	25.5	32.5	13	3
1101	3	3	Experiment	M	21	03Experiment	29	25.5	37	13	3
1117	3	3	Experiment	M	22	03Experiment	30	25.5	32.5	13	3
1133	3	3	Experiment	M	23	03Experiment	31.5	25.5	38	13	3
1149	3	3	Experiment	M	24	03Experiment	35	25.5	40.5	13	3
782	3	3	Experiment	N	1	03Experiment	11	27.5	32	14	3
798	3	3	Experiment	N	2	03Experiment	11.5	27.5	25	14	3
814	3	3	Experiment	N	3	03Experiment	12	27.5	15	14	3
830	3	3	Experiment	N	4	03Experiment	11.5	27.5	25	14	3
846	3	3	Experiment	N	5	03Experiment	20	27.5	33	14	3
862	3	3	Experiment	N	6	03Experiment	14.5	27.5	29	14	3
878	3	3	Experiment	N	7	03Experiment	15.5	27.5	36	14	3
894	3	3	Experiment	N	8	03Experiment	17	27.5	35	14	3
910	3	3	Experiment	N	9	03Experiment	26.5	27.5	30	14	3
926	3	3	Experiment	N	10	03Experiment	21	27.5	33.5	14	3
942	3	3	Experiment	N	11	03Experiment	34.5	27.5	30.5	14	3
958	3	3	Experiment	N	12	03Experiment	27	27.5	35	14	3
974	3	3	Experiment	N	13	03Experiment	9	27.5	16.5	14	3
990	3	3	Experiment	N	14	03Experiment	1	27.5	7	14	3
1006	3	3	Experiment	N	15	03Experiment	28.5	27.5	34	14	3
1022	3	3	Experiment	N	16	03Experiment	30	27.5	36	14	3
1038	3	3	Experiment	N	17	03Experiment	29.5	27.5	34.5	14	3
1054	3	3	Experiment	N	18	03Experiment	27.5	27.5	33.5	14	3
1070	3	3	Experiment	N	19	03Experiment	27.5	27.5	34.5	14	3
1086	3	3	Experiment	N	20	03Experiment	27	27.5	34	14	3
1102	3	3	Experiment	N	21	03Experiment	17.5	27.5	32.5	14	3
1118	3	3	Experiment	N	22	03Experiment	28	27.5	34.5	14	3
1134	3	3	Experiment	N	23	03Experiment	28	27.5	37.5	14	3
1150	3	3	Experiment	N	24	03Experiment	39.5	27.5	47	14	3
783	3	3	Experiment	O	1	03Experiment	10	29.5	11	15	3
799	3	3	Experiment	O	2	03Experiment	25	29.5	26.5	15	3
815	3	3	Experiment	O	3	03Experiment	10	29.5	22.5	15	3
831	3	3	Experiment	O	4	03Experiment	10.5	29.5	22.5	15	3
847	3	3	Experiment	O	5	03Experiment	10	29.5	17	15	3
863	3	3	Experiment	O	6	03Experiment	11.5	29.5	33	15	3
879	3	3	Experiment	O	7	03Experiment	20	29.5	28	15	3
895	3	3	Experiment	O	8	03Experiment	32.5	29.5	31	15	3
911	3	3	Experiment	O	9	03Experiment	32	29.5	39.5	15	3
927	3	3	Experiment	O	10	03Experiment	23.5	29.5	33	15	3
943	3	3	Experiment	O	11	03Experiment	29	29.5	38	15	3
959	3	3	Experiment	O	12	03Experiment	26.5	29.5	30.5	15	3
975	3	3	Experiment	O	13	03Experiment	9.5	29.5	29	15	3
991	3	3	Experiment	O	14	03Experiment	24	29.5	32	15	3
1007	3	3	Experiment	O	15	03Experiment	26	29.5	34	15	3
1023	3	3	Experiment	O	16	03Experiment	29.5	29.5	34	15	3
1039	3	3	Experiment	O	17	03Experiment	34.5	29.5	42	15	3
1055	3	3	Experiment	O	18	03Experiment	27	29.5	28.5	15	3
1071	3	3	Experiment	O	19	03Experiment	27.5	29.5	36	15	3
1087	3	3	Experiment	O	20	03Experiment	23.5	29.5	19	15	3
1103	3	3	Experiment	O	21	03Experiment	21	29.5	39	15	3
1119	3	3	Experiment	O	22	03Experiment	22	29.5	22	15	3
1135	3	3	Experiment	O	23	03Experiment	8	29.5	42	15	3
1151	3	3	Experiment	O	24	03Experiment	32.5	29.5	48	15	3
784	3	3	Experiment	P	1	03Experiment	37.5	31.5	52	16	3
800	3	3	Experiment	P	2	03Experiment	33	31.5	42.5	16	3
816	3	3	Experiment	P	3	03Experiment	35.5	31.5	40.5	16	3
832	3	3	Experiment	P	4	03Experiment	24.5	31.5	43.5	16	3
848	3	3	Experiment	P	5	03Experiment	26.5	31.5	42	16	3
864	3	3	Experiment	P	6	03Experiment	26	31.5	39.5	16	3
880	3	3	Experiment	P	7	03Experiment	34	31.5	42	16	3
896	3	3	Experiment	P	8	03Experiment	33	31.5	45.5	16	3
912	3	3	Experiment	P	9	03Experiment	9	31.5	19	16	3
928	3	3	Experiment	P	10	03Experiment	39.5	31.5	51	16	3
944	3	3	Experiment	P	11	03Experiment	37.5	31.5	45	16	3
960	3	3	Experiment	P	12	03Experiment	0	31.5	52.5	16	3
976	3	3	Experiment	P	13	03Experiment	9.5	31.5	11.5	16	3
992	3	3	Experiment	P	14	03Experiment	35.5	31.5	44.5	16	3
1008	3	3	Experiment	P	15	03Experiment	48	31.5	54	16	3
1024	3	3	Experiment	P	16	03Experiment	39	31.5	47.5	16	3
1040	3	3	Experiment	P	17	03Experiment	36.5	31.5	40.5	16	3
1056	3	3	Experiment	P	18	03Experiment	37.5	31.5	44	16	3
1072	3	3	Experiment	P	19	03Experiment	26.5	31.5	26.5	16	3
1088	3	3	Experiment	P	20	03Experiment	39.5	31.5	47	16	3
1104	3	3	Experiment	P	21	03Experiment	39	31.5	57	16	3
1120	3	3	Experiment	P	22	03Experiment	44.5	31.5	49.5	16	3
1136	3	3	Experiment	P	23	03Experiment	13	31.5	27	16	3
1152	3	3	Experiment	P	24	03Experiment	41	31.5	49	16	3
1153	3	4	Experiment	A	1	04Experiment	49.5	1.5	51.5	1	4
1169	3	4	Experiment	A	2	04Experiment	48.5	1.5	58	1	4
1185	3	4	Experiment	A	3	04Experiment	46.5	1.5	51	1	4
1201	3	4	Experiment	A	4	04Experiment	45.5	1.5	50.5	1	4
1217	3	4	Experiment	A	5	04Experiment	65	1.5	65.5	1	4
1233	3	4	Experiment	A	6	04Experiment	57.5	1.5	56	1	4
1249	3	4	Experiment	A	7	04Experiment	61	1.5	68	1	4
1265	3	4	Experiment	A	8	04Experiment	41.5	1.5	50	1	4
1281	3	4	Experiment	A	9	04Experiment	36.5	1.5	39.5	1	4
1297	3	4	Experiment	A	10	04Experiment	52.5	1.5	48	1	4
1313	3	4	Experiment	A	11	04Experiment	51.5	1.5	56	1	4
1329	3	4	Experiment	A	12	04Experiment	67.5	1.5	66.5	1	4
1345	3	4	Experiment	A	13	04Experiment	64.5	1.5	58.5	1	4
1361	3	4	Experiment	A	14	04Experiment	58	1.5	60	1	4
1377	3	4	Experiment	A	15	04Experiment	61	1.5	56.5	1	4
1393	3	4	Experiment	A	16	04Experiment	48	1.5	58.5	1	4
1409	3	4	Experiment	A	17	04Experiment	59	1.5	55	1	4
1425	3	4	Experiment	A	18	04Experiment	73.5	1.5	87.5	1	4
1441	3	4	Experiment	A	19	04Experiment	51.5	1.5	52.5	1	4
1457	3	4	Experiment	A	20	04Experiment	51	1.5	55	1	4
1473	3	4	Experiment	A	21	04Experiment	60	1.5	59	1	4
1489	3	4	Experiment	A	22	04Experiment	57.5	1.5	59.5	1	4
1505	3	4	Experiment	A	23	04Experiment	55.5	1.5	60.5	1	4
1521	3	4	Experiment	A	24	04Experiment	55	1.5	75.5	1	4
1154	3	4	Experiment	B	1	04Experiment	46	3.5	52.5	2	4
1170	3	4	Experiment	B	2	04Experiment	36	3.5	38.5	2	4
1186	3	4	Experiment	B	3	04Experiment	42.5	3.5	38	2	4
1202	3	4	Experiment	B	4	04Experiment	52	3.5	65	2	4
1218	3	4	Experiment	B	5	04Experiment	46.5	3.5	44.5	2	4
1234	3	4	Experiment	B	6	04Experiment	44	3.5	47	2	4
1250	3	4	Experiment	B	7	04Experiment	51	3.5	47	2	4
1266	3	4	Experiment	B	8	04Experiment	60	3.5	50.5	2	4
1282	3	4	Experiment	B	9	04Experiment	34.5	3.5	33.5	2	4
1298	3	4	Experiment	B	10	04Experiment	50.5	3.5	30.5	2	4
1314	3	4	Experiment	B	11	04Experiment	50	3.5	51	2	4
1330	3	4	Experiment	B	12	04Experiment	51	3.5	50.5	2	4
1346	3	4	Experiment	B	13	04Experiment	67.5	3.5	63.5	2	4
1362	3	4	Experiment	B	14	04Experiment	52	3.5	49	2	4
1378	3	4	Experiment	B	15	04Experiment	50.5	3.5	47.5	2	4
1394	3	4	Experiment	B	16	04Experiment	56.5	3.5	48.5	2	4
1410	3	4	Experiment	B	17	04Experiment	35.5	3.5	39.5	2	4
1426	3	4	Experiment	B	18	04Experiment	54.5	3.5	49	2	4
1442	3	4	Experiment	B	19	04Experiment	59	3.5	49.5	2	4
1458	3	4	Experiment	B	20	04Experiment	54	3.5	48.5	2	4
1474	3	4	Experiment	B	21	04Experiment	55.5	3.5	55.5	2	4
1490	3	4	Experiment	B	22	04Experiment	55.5	3.5	52	2	4
1506	3	4	Experiment	B	23	04Experiment	52.5	3.5	55	2	4
1522	3	4	Experiment	B	24	04Experiment	60	3.5	59.5	2	4
1155	3	4	Experiment	C	1	04Experiment	47.5	5.5	50.5	3	4
1171	3	4	Experiment	C	2	04Experiment	42	5.5	44.5	3	4
1187	3	4	Experiment	C	3	04Experiment	46	5.5	42.5	3	4
1203	3	4	Experiment	C	4	04Experiment	21	5.5	33.5	3	4
1219	3	4	Experiment	C	5	04Experiment	57	5.5	59.5	3	4
1235	3	4	Experiment	C	6	04Experiment	50.5	5.5	50	3	4
1251	3	4	Experiment	C	7	04Experiment	55	5.5	47.5	3	4
1267	3	4	Experiment	C	8	04Experiment	19.5	5.5	19.5	3	4
1283	3	4	Experiment	C	9	04Experiment	50.5	5.5	43	3	4
1299	3	4	Experiment	C	10	04Experiment	49.5	5.5	46	3	4
1315	3	4	Experiment	C	11	04Experiment	47.5	5.5	45	3	4
1331	3	4	Experiment	C	12	04Experiment	57	5.5	60.5	3	4
1347	3	4	Experiment	C	13	04Experiment	53	5.5	45	3	4
1363	3	4	Experiment	C	14	04Experiment	34.5	5.5	47	3	4
1379	3	4	Experiment	C	15	04Experiment	39	5.5	41	3	4
1395	3	4	Experiment	C	16	04Experiment	54	5.5	46.5	3	4
1411	3	4	Experiment	C	17	04Experiment	62	5.5	45.5	3	4
1427	3	4	Experiment	C	18	04Experiment	54.5	5.5	46	3	4
1443	3	4	Experiment	C	19	04Experiment	54	5.5	67	3	4
1459	3	4	Experiment	C	20	04Experiment	47	5.5	46.5	3	4
1475	3	4	Experiment	C	21	04Experiment	52.5	5.5	48.5	3	4
1491	3	4	Experiment	C	22	04Experiment	46	5.5	56	3	4
1507	3	4	Experiment	C	23	04Experiment	36.5	5.5	37	3	4
1523	3	4	Experiment	C	24	04Experiment	49	5.5	60.5	3	4
1156	3	4	Experiment	D	1	04Experiment	44	7.5	47	4	4
1172	3	4	Experiment	D	2	04Experiment	41.5	7.5	46	4	4
1188	3	4	Experiment	D	3	04Experiment	44	7.5	41.5	4	4
1204	3	4	Experiment	D	4	04Experiment	37	7.5	44	4	4
1220	3	4	Experiment	D	5	04Experiment	42	7.5	34	4	4
1236	3	4	Experiment	D	6	04Experiment	45	7.5	38.5	4	4
1252	3	4	Experiment	D	7	04Experiment	47.5	7.5	42.5	4	4
1268	3	4	Experiment	D	8	04Experiment	61	7.5	52.5	4	4
1284	3	4	Experiment	D	9	04Experiment	36.5	7.5	45.5	4	4
1300	3	4	Experiment	D	10	04Experiment	47.5	7.5	43.5	4	4
1316	3	4	Experiment	D	11	04Experiment	53.5	7.5	43	4	4
1332	3	4	Experiment	D	12	04Experiment	61	7.5	44	4	4
1348	3	4	Experiment	D	13	04Experiment	28	7.5	31.5	4	4
1364	3	4	Experiment	D	14	04Experiment	51.5	7.5	45.5	4	4
1380	3	4	Experiment	D	15	04Experiment	54	7.5	44.5	4	4
1396	3	4	Experiment	D	16	04Experiment	52	7.5	44.5	4	4
1412	3	4	Experiment	D	17	04Experiment	57	7.5	45.5	4	4
1428	3	4	Experiment	D	18	04Experiment	29.5	7.5	42.5	4	4
1444	3	4	Experiment	D	19	04Experiment	59.5	7.5	51.5	4	4
1460	3	4	Experiment	D	20	04Experiment	52.5	7.5	44	4	4
1476	3	4	Experiment	D	21	04Experiment	13	7.5	19.5	4	4
1492	3	4	Experiment	D	22	04Experiment	48.5	7.5	53	4	4
1508	3	4	Experiment	D	23	04Experiment	58.5	7.5	50	4	4
1524	3	4	Experiment	D	24	04Experiment	57	7.5	55	4	4
1157	3	4	Experiment	E	1	04Experiment	59	9.5	56.5	5	4
1173	3	4	Experiment	E	2	04Experiment	40.5	9.5	43	5	4
1189	3	4	Experiment	E	3	04Experiment	54.5	9.5	48.5	5	4
1205	3	4	Experiment	E	4	04Experiment	34	9.5	18	5	4
1221	3	4	Experiment	E	5	04Experiment	34.5	9.5	34.5	5	4
1237	3	4	Experiment	E	6	04Experiment	59	9.5	59	5	4
1253	3	4	Experiment	E	7	04Experiment	42.5	9.5	40	5	4
1269	3	4	Experiment	E	8	04Experiment	39	9.5	37	5	4
1285	3	4	Experiment	E	9	04Experiment	38.5	9.5	35.5	5	4
1301	3	4	Experiment	E	10	04Experiment	46.5	9.5	40	5	4
1317	3	4	Experiment	E	11	04Experiment	53	9.5	51.5	5	4
1333	3	4	Experiment	E	12	04Experiment	49	9.5	38.5	5	4
1349	3	4	Experiment	E	13	04Experiment	49	9.5	63.5	5	4
1365	3	4	Experiment	E	14	04Experiment	49.5	9.5	45	5	4
1381	3	4	Experiment	E	15	04Experiment	25	9.5	22.5	5	4
1397	3	4	Experiment	E	16	04Experiment	54.5	9.5	46	5	4
1413	3	4	Experiment	E	17	04Experiment	49	9.5	70	5	4
1429	3	4	Experiment	E	18	04Experiment	42.5	9.5	42.5	5	4
1445	3	4	Experiment	E	19	04Experiment	53.5	9.5	45	5	4
1461	3	4	Experiment	E	20	04Experiment	41.5	9.5	39.5	5	4
1477	3	4	Experiment	E	21	04Experiment	44	9.5	44.5	5	4
1493	3	4	Experiment	E	22	04Experiment	41	9.5	40	5	4
1509	3	4	Experiment	E	23	04Experiment	49.5	9.5	56.5	5	4
1525	3	4	Experiment	E	24	04Experiment	37	9.5	44	5	4
1158	3	4	Experiment	F	1	04Experiment	41.5	11.5	41.5	6	4
1174	3	4	Experiment	F	2	04Experiment	38.5	11.5	41.5	6	4
1190	3	4	Experiment	F	3	04Experiment	39	11.5	37.5	6	4
1206	3	4	Experiment	F	4	04Experiment	39	11.5	41	6	4
1222	3	4	Experiment	F	5	04Experiment	40	11.5	42.5	6	4
1238	3	4	Experiment	F	6	04Experiment	42	11.5	38.5	6	4
1254	3	4	Experiment	F	7	04Experiment	40	11.5	40	6	4
1270	3	4	Experiment	F	8	04Experiment	44.5	11.5	42.5	6	4
1286	3	4	Experiment	F	9	04Experiment	2.5	11.5	5.5	6	4
1302	3	4	Experiment	F	10	04Experiment	14.5	11.5	22.5	6	4
1318	3	4	Experiment	F	11	04Experiment	51	11.5	43.5	6	4
1334	3	4	Experiment	F	12	04Experiment	48	11.5	39.5	6	4
1350	3	4	Experiment	F	13	04Experiment	48	11.5	56	6	4
1366	3	4	Experiment	F	14	04Experiment	50	11.5	44	6	4
1382	3	4	Experiment	F	15	04Experiment	48.5	11.5	42	6	4
1398	3	4	Experiment	F	16	04Experiment	51	11.5	44	6	4
1414	3	4	Experiment	F	17	04Experiment	44	11.5	40.5	6	4
1430	3	4	Experiment	F	18	04Experiment	48.5	11.5	43	6	4
1446	3	4	Experiment	F	19	04Experiment	54	11.5	42	6	4
1462	3	4	Experiment	F	20	04Experiment	46.5	11.5	48.5	6	4
1478	3	4	Experiment	F	21	04Experiment	45	11.5	43	6	4
1494	3	4	Experiment	F	22	04Experiment	46	11.5	57.5	6	4
1510	3	4	Experiment	F	23	04Experiment	56.5	11.5	52.5	6	4
1526	3	4	Experiment	F	24	04Experiment	56.5	11.5	51.5	6	4
1159	3	4	Experiment	G	1	04Experiment	52	13.5	68.5	7	4
1175	3	4	Experiment	G	2	04Experiment	37.5	13.5	36.5	7	4
1191	3	4	Experiment	G	3	04Experiment	35.5	13.5	30	7	4
1207	3	4	Experiment	G	4	04Experiment	36	13.5	40	7	4
1223	3	4	Experiment	G	5	04Experiment	38.5	13.5	37	7	4
1239	3	4	Experiment	G	6	04Experiment	43	13.5	38	7	4
1255	3	4	Experiment	G	7	04Experiment	46.5	13.5	39.5	7	4
1271	3	4	Experiment	G	8	04Experiment	48.5	13.5	40.5	7	4
1287	3	4	Experiment	G	9	04Experiment	38.5	13.5	31	7	4
1303	3	4	Experiment	G	10	04Experiment	44	13.5	39	7	4
1319	3	4	Experiment	G	11	04Experiment	5.5	13.5	4.5	7	4
1335	3	4	Experiment	G	12	04Experiment	48	13.5	43	7	4
1351	3	4	Experiment	G	13	04Experiment	46	13.5	39	7	4
1367	3	4	Experiment	G	14	04Experiment	48	13.5	53.5	7	4
1383	3	4	Experiment	G	15	04Experiment	48.5	13.5	41	7	4
1399	3	4	Experiment	G	16	04Experiment	47	13.5	40	7	4
1415	3	4	Experiment	G	17	04Experiment	48	13.5	42	7	4
1431	3	4	Experiment	G	18	04Experiment	47.5	13.5	42	7	4
1447	3	4	Experiment	G	19	04Experiment	53.5	13.5	43.5	7	4
1463	3	4	Experiment	G	20	04Experiment	48	13.5	43	7	4
1479	3	4	Experiment	G	21	04Experiment	43	13.5	39.5	7	4
1495	3	4	Experiment	G	22	04Experiment	42.5	13.5	40	7	4
1511	3	4	Experiment	G	23	04Experiment	62	13.5	75.5	7	4
1527	3	4	Experiment	G	24	04Experiment	44.5	13.5	45	7	4
1160	3	4	Experiment	H	1	04Experiment	43	15.5	51.5	8	4
1176	3	4	Experiment	H	2	04Experiment	36.5	15.5	42.5	8	4
1192	3	4	Experiment	H	3	04Experiment	37.5	15.5	36.5	8	4
1208	3	4	Experiment	H	4	04Experiment	38	15.5	39	8	4
1224	3	4	Experiment	H	5	04Experiment	40.5	15.5	36	8	4
1240	3	4	Experiment	H	6	04Experiment	39.5	15.5	33.5	8	4
1256	3	4	Experiment	H	7	04Experiment	44.5	15.5	37	8	4
1272	3	4	Experiment	H	8	04Experiment	49.5	15.5	36.5	8	4
1288	3	4	Experiment	H	9	04Experiment	48.5	15.5	40.5	8	4
1304	3	4	Experiment	H	10	04Experiment	46.5	15.5	38.5	8	4
1320	3	4	Experiment	H	11	04Experiment	46	15.5	40	8	4
1336	3	4	Experiment	H	12	04Experiment	46.5	15.5	40.5	8	4
1352	3	4	Experiment	H	13	04Experiment	56	15.5	45	8	4
1368	3	4	Experiment	H	14	04Experiment	31	15.5	24.5	8	4
1384	3	4	Experiment	H	15	04Experiment	31.5	15.5	23.5	8	4
1400	3	4	Experiment	H	16	04Experiment	45	15.5	39.5	8	4
1416	3	4	Experiment	H	17	04Experiment	46.5	15.5	39	8	4
1432	3	4	Experiment	H	18	04Experiment	38.5	15.5	37	8	4
1448	3	4	Experiment	H	19	04Experiment	51	15.5	44	8	4
1464	3	4	Experiment	H	20	04Experiment	51	15.5	39.5	8	4
1480	3	4	Experiment	H	21	04Experiment	40	15.5	46	8	4
1496	3	4	Experiment	H	22	04Experiment	43	15.5	37	8	4
1512	3	4	Experiment	H	23	04Experiment	38.5	15.5	38	8	4
1528	3	4	Experiment	H	24	04Experiment	53.5	15.5	43.5	8	4
1161	3	4	Experiment	I	1	04Experiment	40.5	17.5	43.5	9	4
1177	3	4	Experiment	I	2	04Experiment	38	17.5	31	9	4
1193	3	4	Experiment	I	3	04Experiment	36	17.5	32.5	9	4
1209	3	4	Experiment	I	4	04Experiment	36	17.5	34.5	9	4
1225	3	4	Experiment	I	5	04Experiment	40	17.5	31.5	9	4
1241	3	4	Experiment	I	6	04Experiment	41	17.5	32.5	9	4
1257	3	4	Experiment	I	7	04Experiment	51	17.5	42	9	4
1273	3	4	Experiment	I	8	04Experiment	39	17.5	36	9	4
1289	3	4	Experiment	I	9	04Experiment	53	17.5	45	9	4
1305	3	4	Experiment	I	10	04Experiment	44	17.5	35	9	4
1321	3	4	Experiment	I	11	04Experiment	33.5	17.5	35	9	4
1337	3	4	Experiment	I	12	04Experiment	35.5	17.5	37.5	9	4
1353	3	4	Experiment	I	13	04Experiment	52	17.5	43	9	4
1369	3	4	Experiment	I	14	04Experiment	40	17.5	36.5	9	4
1385	3	4	Experiment	I	15	04Experiment	14.5	17.5	13.5	9	4
1401	3	4	Experiment	I	16	04Experiment	35.5	17.5	36.5	9	4
1417	3	4	Experiment	I	17	04Experiment	46.5	17.5	36	9	4
1433	3	4	Experiment	I	18	04Experiment	34.5	17.5	38.5	9	4
1449	3	4	Experiment	I	19	04Experiment	40.5	17.5	45.5	9	4
1465	3	4	Experiment	I	20	04Experiment	42.5	17.5	37	9	4
1481	3	4	Experiment	I	21	04Experiment	38.5	17.5	36	9	4
1497	3	4	Experiment	I	22	04Experiment	40.5	17.5	41	9	4
1513	3	4	Experiment	I	23	04Experiment	6	17.5	16.5	9	4
1529	3	4	Experiment	I	24	04Experiment	35.5	17.5	55	9	4
1162	3	4	Experiment	J	1	04Experiment	41	19.5	43	10	4
1178	3	4	Experiment	J	2	04Experiment	33.5	19.5	38.5	10	4
1194	3	4	Experiment	J	3	04Experiment	41	19.5	35.5	10	4
1210	3	4	Experiment	J	4	04Experiment	37	19.5	36.5	10	4
1226	3	4	Experiment	J	5	04Experiment	35.5	19.5	29.5	10	4
1242	3	4	Experiment	J	6	04Experiment	40.5	19.5	33.5	10	4
1258	3	4	Experiment	J	7	04Experiment	47	19.5	43	10	4
1274	3	4	Experiment	J	8	04Experiment	41	19.5	35	10	4
1290	3	4	Experiment	J	9	04Experiment	35	19.5	35.5	10	4
1306	3	4	Experiment	J	10	04Experiment	30.5	19.5	34	10	4
1322	3	4	Experiment	J	11	04Experiment	39	19.5	36.5	10	4
1338	3	4	Experiment	J	12	04Experiment	36.5	19.5	36	10	4
1354	3	4	Experiment	J	13	04Experiment	36.5	19.5	32.5	10	4
1370	3	4	Experiment	J	14	04Experiment	42	19.5	35	10	4
1386	3	4	Experiment	J	15	04Experiment	32.5	19.5	32	10	4
1402	3	4	Experiment	J	16	04Experiment	36.5	19.5	34.5	10	4
1418	3	4	Experiment	J	17	04Experiment	38.5	19.5	37	10	4
1434	3	4	Experiment	J	18	04Experiment	41	19.5	36.5	10	4
1450	3	4	Experiment	J	19	04Experiment	42	19.5	56	10	4
1466	3	4	Experiment	J	20	04Experiment	0	19.5	5	10	4
1482	3	4	Experiment	J	21	04Experiment	0	19.5	34.5	10	4
1498	3	4	Experiment	J	22	04Experiment	34	19.5	34	10	4
1514	3	4	Experiment	J	23	04Experiment	38	19.5	32.5	10	4
1530	3	4	Experiment	J	24	04Experiment	43	19.5	43.5	10	4
1163	3	4	Experiment	K	1	04Experiment	38	21.5	42.5	11	4
1179	3	4	Experiment	K	2	04Experiment	32.5	21.5	37	11	4
1195	3	4	Experiment	K	3	04Experiment	34	21.5	33.5	11	4
1211	3	4	Experiment	K	4	04Experiment	31.5	21.5	31.5	11	4
1227	3	4	Experiment	K	5	04Experiment	36.5	21.5	35.5	11	4
1243	3	4	Experiment	K	6	04Experiment	37	21.5	32	11	4
1259	3	4	Experiment	K	7	04Experiment	42.5	21.5	41	11	4
1275	3	4	Experiment	K	8	04Experiment	35.5	21.5	34.5	11	4
1291	3	4	Experiment	K	9	04Experiment	39.5	21.5	35.5	11	4
1307	3	4	Experiment	K	10	04Experiment	35	21.5	33.5	11	4
1323	3	4	Experiment	K	11	04Experiment	38.5	21.5	36.5	11	4
1339	3	4	Experiment	K	12	04Experiment	39	21.5	35.5	11	4
1355	3	4	Experiment	K	13	04Experiment	39	21.5	29.5	11	4
1371	3	4	Experiment	K	14	04Experiment	37.5	21.5	32.5	11	4
1387	3	4	Experiment	K	15	04Experiment	7	21.5	5.5	11	4
1403	3	4	Experiment	K	16	04Experiment	45.5	21.5	38.5	11	4
1419	3	4	Experiment	K	17	04Experiment	22.5	21.5	20	11	4
1435	3	4	Experiment	K	18	04Experiment	39.5	21.5	33	11	4
1451	3	4	Experiment	K	19	04Experiment	22.5	21.5	24	11	4
1467	3	4	Experiment	K	20	04Experiment	44	21.5	35.5	11	4
1483	3	4	Experiment	K	21	04Experiment	31.5	21.5	26.5	11	4
1499	3	4	Experiment	K	22	04Experiment	40	21.5	38.5	11	4
1515	3	4	Experiment	K	23	04Experiment	34.5	21.5	36.5	11	4
1531	3	4	Experiment	K	24	04Experiment	35	21.5	45	11	4
1164	3	4	Experiment	L	1	04Experiment	36.5	23.5	41.5	12	4
1180	3	4	Experiment	L	2	04Experiment	33.5	23.5	35.5	12	4
1196	3	4	Experiment	L	3	04Experiment	33	23.5	32	12	4
1212	3	4	Experiment	L	4	04Experiment	31.5	23.5	32	12	4
1228	3	4	Experiment	L	5	04Experiment	28.5	23.5	31.5	12	4
1244	3	4	Experiment	L	6	04Experiment	35.5	23.5	30	12	4
1260	3	4	Experiment	L	7	04Experiment	34.5	23.5	31	12	4
1276	3	4	Experiment	L	8	04Experiment	34.5	23.5	34.5	12	4
1292	3	4	Experiment	L	9	04Experiment	48.5	23.5	39	12	4
1308	3	4	Experiment	L	10	04Experiment	36.5	23.5	32	12	4
1324	3	4	Experiment	L	11	04Experiment	13	23.5	23	12	4
1340	3	4	Experiment	L	12	04Experiment	43	23.5	36	12	4
1356	3	4	Experiment	L	13	04Experiment	22.5	23.5	27.5	12	4
1372	3	4	Experiment	L	14	04Experiment	17	23.5	25.5	12	4
1388	3	4	Experiment	L	15	04Experiment	41.5	23.5	36	12	4
1404	3	4	Experiment	L	16	04Experiment	0	23.5	0	12	4
1420	3	4	Experiment	L	17	04Experiment	41	23.5	37.5	12	4
1436	3	4	Experiment	L	18	04Experiment	14	23.5	15.5	12	4
1452	3	4	Experiment	L	19	04Experiment	39	23.5	40.5	12	4
1468	3	4	Experiment	L	20	04Experiment	0	23.5	0	12	4
1484	3	4	Experiment	L	21	04Experiment	28.5	23.5	36.5	12	4
1500	3	4	Experiment	L	22	04Experiment	1	23.5	2	12	4
1516	3	4	Experiment	L	23	04Experiment	30	23.5	42.5	12	4
1532	3	4	Experiment	L	24	04Experiment	41.5	23.5	44	12	4
1165	3	4	Experiment	M	1	04Experiment	36.5	25.5	37	13	4
1181	3	4	Experiment	M	2	04Experiment	38.5	25.5	32.5	13	4
1197	3	4	Experiment	M	3	04Experiment	30	25.5	39	13	4
1213	3	4	Experiment	M	4	04Experiment	29.5	25.5	33	13	4
1229	3	4	Experiment	M	5	04Experiment	35.5	25.5	34.5	13	4
1245	3	4	Experiment	M	6	04Experiment	28	25.5	31	13	4
1261	3	4	Experiment	M	7	04Experiment	34.5	25.5	35	13	4
1277	3	4	Experiment	M	8	04Experiment	42.5	25.5	43	13	4
1293	3	4	Experiment	M	9	04Experiment	39	25.5	35	13	4
1309	3	4	Experiment	M	10	04Experiment	38.5	25.5	33	13	4
1325	3	4	Experiment	M	11	04Experiment	34	25.5	39.5	13	4
1341	3	4	Experiment	M	12	04Experiment	38.5	25.5	39	13	4
1357	3	4	Experiment	M	13	04Experiment	41	25.5	34.5	13	4
1373	3	4	Experiment	M	14	04Experiment	39	25.5	36.5	13	4
1389	3	4	Experiment	M	15	04Experiment	38	25.5	35.5	13	4
1405	3	4	Experiment	M	16	04Experiment	41.5	25.5	34	13	4
1421	3	4	Experiment	M	17	04Experiment	39.5	25.5	36.5	13	4
1437	3	4	Experiment	M	18	04Experiment	34	25.5	35	13	4
1453	3	4	Experiment	M	19	04Experiment	32.5	25.5	33	13	4
1469	3	4	Experiment	M	20	04Experiment	37.5	25.5	32.5	13	4
1485	3	4	Experiment	M	21	04Experiment	36	25.5	37	13	4
1501	3	4	Experiment	M	22	04Experiment	37	25.5	32.5	13	4
1517	3	4	Experiment	M	23	04Experiment	35.5	25.5	38	13	4
1533	3	4	Experiment	M	24	04Experiment	30.5	25.5	40.5	13	4
1166	3	4	Experiment	N	1	04Experiment	28	27.5	32	14	4
1182	3	4	Experiment	N	2	04Experiment	24	27.5	25	14	4
1198	3	4	Experiment	N	3	04Experiment	23	27.5	15	14	4
1214	3	4	Experiment	N	4	04Experiment	27	27.5	25	14	4
1230	3	4	Experiment	N	5	04Experiment	34.5	27.5	33	14	4
1246	3	4	Experiment	N	6	04Experiment	30	27.5	29	14	4
1262	3	4	Experiment	N	7	04Experiment	31	27.5	36	14	4
1278	3	4	Experiment	N	8	04Experiment	37	27.5	35	14	4
1294	3	4	Experiment	N	9	04Experiment	35.5	27.5	30	14	4
1310	3	4	Experiment	N	10	04Experiment	37	27.5	33.5	14	4
1326	3	4	Experiment	N	11	04Experiment	31	27.5	30.5	14	4
1342	3	4	Experiment	N	12	04Experiment	37.5	27.5	35	14	4
1358	3	4	Experiment	N	13	04Experiment	9	27.5	16.5	14	4
1374	3	4	Experiment	N	14	04Experiment	16	27.5	7	14	4
1390	3	4	Experiment	N	15	04Experiment	38.5	27.5	34	14	4
1406	3	4	Experiment	N	16	04Experiment	45.5	27.5	36	14	4
1422	3	4	Experiment	N	17	04Experiment	35.5	27.5	34.5	14	4
1438	3	4	Experiment	N	18	04Experiment	33	27.5	33.5	14	4
1454	3	4	Experiment	N	19	04Experiment	37	27.5	34.5	14	4
1470	3	4	Experiment	N	20	04Experiment	36	27.5	34	14	4
1486	3	4	Experiment	N	21	04Experiment	29	27.5	32.5	14	4
1502	3	4	Experiment	N	22	04Experiment	35	27.5	34.5	14	4
1518	3	4	Experiment	N	23	04Experiment	30	27.5	37.5	14	4
1534	3	4	Experiment	N	24	04Experiment	43.5	27.5	47	14	4
1167	3	4	Experiment	O	1	04Experiment	10	29.5	11	15	4
1183	3	4	Experiment	O	2	04Experiment	25	29.5	26.5	15	4
1199	3	4	Experiment	O	3	04Experiment	17.5	29.5	22.5	15	4
1215	3	4	Experiment	O	4	04Experiment	12	29.5	22.5	15	4
1231	3	4	Experiment	O	5	04Experiment	12.5	29.5	17	15	4
1247	3	4	Experiment	O	6	04Experiment	32.5	29.5	33	15	4
1263	3	4	Experiment	O	7	04Experiment	37.5	29.5	28	15	4
1279	3	4	Experiment	O	8	04Experiment	36	29.5	31	15	4
1295	3	4	Experiment	O	9	04Experiment	33.5	29.5	39.5	15	4
1311	3	4	Experiment	O	10	04Experiment	30	29.5	33	15	4
1327	3	4	Experiment	O	11	04Experiment	41	29.5	38	15	4
1343	3	4	Experiment	O	12	04Experiment	29.5	29.5	30.5	15	4
1359	3	4	Experiment	O	13	04Experiment	24.5	29.5	29	15	4
1375	3	4	Experiment	O	14	04Experiment	27.5	29.5	32	15	4
1391	3	4	Experiment	O	15	04Experiment	35.5	29.5	34	15	4
1407	3	4	Experiment	O	16	04Experiment	37	29.5	34	15	4
1423	3	4	Experiment	O	17	04Experiment	36	29.5	42	15	4
1439	3	4	Experiment	O	18	04Experiment	30.5	29.5	28.5	15	4
1455	3	4	Experiment	O	19	04Experiment	38.5	29.5	36	15	4
1471	3	4	Experiment	O	20	04Experiment	24.5	29.5	19	15	4
1487	3	4	Experiment	O	21	04Experiment	34	29.5	39	15	4
1503	3	4	Experiment	O	22	04Experiment	26.5	29.5	22	15	4
1519	3	4	Experiment	O	23	04Experiment	15.5	29.5	42	15	4
1535	3	4	Experiment	O	24	04Experiment	42	29.5	48	15	4
1168	3	4	Experiment	P	1	04Experiment	46	31.5	52	16	4
1184	3	4	Experiment	P	2	04Experiment	38	31.5	42.5	16	4
1200	3	4	Experiment	P	3	04Experiment	39	31.5	40.5	16	4
1216	3	4	Experiment	P	4	04Experiment	40	31.5	43.5	16	4
1232	3	4	Experiment	P	5	04Experiment	38	31.5	42	16	4
1248	3	4	Experiment	P	6	04Experiment	42	31.5	39.5	16	4
1264	3	4	Experiment	P	7	04Experiment	40	31.5	42	16	4
1280	3	4	Experiment	P	8	04Experiment	37	31.5	45.5	16	4
1296	3	4	Experiment	P	9	04Experiment	18.5	31.5	19	16	4
1312	3	4	Experiment	P	10	04Experiment	50.5	31.5	51	16	4
1328	3	4	Experiment	P	11	04Experiment	46.5	31.5	45	16	4
1344	3	4	Experiment	P	12	04Experiment	0	31.5	52.5	16	4
1360	3	4	Experiment	P	13	04Experiment	9.5	31.5	11.5	16	4
1376	3	4	Experiment	P	14	04Experiment	42	31.5	44.5	16	4
1392	3	4	Experiment	P	15	04Experiment	47	31.5	54	16	4
1408	3	4	Experiment	P	16	04Experiment	46.5	31.5	47.5	16	4
1424	3	4	Experiment	P	17	04Experiment	44.5	31.5	40.5	16	4
1440	3	4	Experiment	P	18	04Experiment	40.5	31.5	44	16	4
1456	3	4	Experiment	P	19	04Experiment	29	31.5	26.5	16	4
1472	3	4	Experiment	P	20	04Experiment	50	31.5	47	16	4
1488	3	4	Experiment	P	21	04Experiment	43	31.5	57	16	4
1504	3	4	Experiment	P	22	04Experiment	48	31.5	49.5	16	4
1520	3	4	Experiment	P	23	04Experiment	10.5	31.5	27	16	4
1536	3	4	Experiment	P	24	04Experiment	43.5	31.5	49	16	4
1537	3	5	Experiment	A	1	05Experiment	45.5	1.5	51.5	1	5
1553	3	5	Experiment	A	2	05Experiment	49	1.5	58	1	5
1569	3	5	Experiment	A	3	05Experiment	50	1.5	51	1	5
1585	3	5	Experiment	A	4	05Experiment	49	1.5	50.5	1	5
1601	3	5	Experiment	A	5	05Experiment	58.5	1.5	65.5	1	5
1617	3	5	Experiment	A	6	05Experiment	54.5	1.5	56	1	5
1633	3	5	Experiment	A	7	05Experiment	52.5	1.5	68	1	5
1649	3	5	Experiment	A	8	05Experiment	50.5	1.5	50	1	5
1665	3	5	Experiment	A	9	05Experiment	40	1.5	39.5	1	5
1681	3	5	Experiment	A	10	05Experiment	47.5	1.5	48	1	5
1697	3	5	Experiment	A	11	05Experiment	56.5	1.5	56	1	5
1713	3	5	Experiment	A	12	05Experiment	62	1.5	66.5	1	5
1729	3	5	Experiment	A	13	05Experiment	62.5	1.5	58.5	1	5
1745	3	5	Experiment	A	14	05Experiment	60	1.5	60	1	5
1761	3	5	Experiment	A	15	05Experiment	61.5	1.5	56.5	1	5
1777	3	5	Experiment	A	16	05Experiment	44	1.5	58.5	1	5
1793	3	5	Experiment	A	17	05Experiment	60.5	1.5	55	1	5
1809	3	5	Experiment	A	18	05Experiment	81	1.5	87.5	1	5
1825	3	5	Experiment	A	19	05Experiment	57	1.5	52.5	1	5
1841	3	5	Experiment	A	20	05Experiment	59	1.5	55	1	5
1857	3	5	Experiment	A	21	05Experiment	60	1.5	59	1	5
1873	3	5	Experiment	A	22	05Experiment	63	1.5	59.5	1	5
1889	3	5	Experiment	A	23	05Experiment	61	1.5	60.5	1	5
1905	3	5	Experiment	A	24	05Experiment	59.5	1.5	75.5	1	5
1538	3	5	Experiment	B	1	05Experiment	45.5	3.5	52.5	2	5
1554	3	5	Experiment	B	2	05Experiment	36.5	3.5	38.5	2	5
1570	3	5	Experiment	B	3	05Experiment	37.5	3.5	38	2	5
1586	3	5	Experiment	B	4	05Experiment	55	3.5	65	2	5
1602	3	5	Experiment	B	5	05Experiment	47	3.5	44.5	2	5
1618	3	5	Experiment	B	6	05Experiment	46.5	3.5	47	2	5
1634	3	5	Experiment	B	7	05Experiment	48.5	3.5	47	2	5
1650	3	5	Experiment	B	8	05Experiment	49	3.5	50.5	2	5
1666	3	5	Experiment	B	9	05Experiment	33	3.5	33.5	2	5
1682	3	5	Experiment	B	10	05Experiment	48	3.5	30.5	2	5
1698	3	5	Experiment	B	11	05Experiment	56	3.5	51	2	5
1714	3	5	Experiment	B	12	05Experiment	56	3.5	50.5	2	5
1730	3	5	Experiment	B	13	05Experiment	61	3.5	63.5	2	5
1746	3	5	Experiment	B	14	05Experiment	55.5	3.5	49	2	5
1762	3	5	Experiment	B	15	05Experiment	55	3.5	47.5	2	5
1778	3	5	Experiment	B	16	05Experiment	54	3.5	48.5	2	5
1794	3	5	Experiment	B	17	05Experiment	44.5	3.5	39.5	2	5
1810	3	5	Experiment	B	18	05Experiment	54.5	3.5	49	2	5
1826	3	5	Experiment	B	19	05Experiment	52	3.5	49.5	2	5
1842	3	5	Experiment	B	20	05Experiment	52	3.5	48.5	2	5
1858	3	5	Experiment	B	21	05Experiment	56	3.5	55.5	2	5
1874	3	5	Experiment	B	22	05Experiment	58	3.5	52	2	5
1890	3	5	Experiment	B	23	05Experiment	56	3.5	55	2	5
1906	3	5	Experiment	B	24	05Experiment	59	3.5	59.5	2	5
1539	3	5	Experiment	C	1	05Experiment	44.5	5.5	50.5	3	5
1555	3	5	Experiment	C	2	05Experiment	42.5	5.5	44.5	3	5
1571	3	5	Experiment	C	3	05Experiment	48	5.5	42.5	3	5
1587	3	5	Experiment	C	4	05Experiment	20	5.5	33.5	3	5
1603	3	5	Experiment	C	5	05Experiment	52.5	5.5	59.5	3	5
1619	3	5	Experiment	C	6	05Experiment	48.5	5.5	50	3	5
1635	3	5	Experiment	C	7	05Experiment	49	5.5	47.5	3	5
1651	3	5	Experiment	C	8	05Experiment	16.5	5.5	19.5	3	5
1667	3	5	Experiment	C	9	05Experiment	46.5	5.5	43	3	5
1683	3	5	Experiment	C	10	05Experiment	47.5	5.5	46	3	5
1699	3	5	Experiment	C	11	05Experiment	53.5	5.5	45	3	5
1715	3	5	Experiment	C	12	05Experiment	61	5.5	60.5	3	5
1731	3	5	Experiment	C	13	05Experiment	52	5.5	45	3	5
1747	3	5	Experiment	C	14	05Experiment	53.5	5.5	47	3	5
1763	3	5	Experiment	C	15	05Experiment	40.5	5.5	41	3	5
1779	3	5	Experiment	C	16	05Experiment	53	5.5	46.5	3	5
1795	3	5	Experiment	C	17	05Experiment	50	5.5	45.5	3	5
1811	3	5	Experiment	C	18	05Experiment	52	5.5	46	3	5
1827	3	5	Experiment	C	19	05Experiment	63.5	5.5	67	3	5
1843	3	5	Experiment	C	20	05Experiment	47.5	5.5	46.5	3	5
1859	3	5	Experiment	C	21	05Experiment	52.5	5.5	48.5	3	5
1875	3	5	Experiment	C	22	05Experiment	50	5.5	56	3	5
1891	3	5	Experiment	C	23	05Experiment	40	5.5	37	3	5
1907	3	5	Experiment	C	24	05Experiment	49	5.5	60.5	3	5
1540	3	5	Experiment	D	1	05Experiment	39.5	7.5	47	4	5
1556	3	5	Experiment	D	2	05Experiment	44.5	7.5	46	4	5
1572	3	5	Experiment	D	3	05Experiment	41	7.5	41.5	4	5
1588	3	5	Experiment	D	4	05Experiment	38.5	7.5	44	4	5
1604	3	5	Experiment	D	5	05Experiment	38	7.5	34	4	5
1620	3	5	Experiment	D	6	05Experiment	46	7.5	38.5	4	5
1636	3	5	Experiment	D	7	05Experiment	48.5	7.5	42.5	4	5
1652	3	5	Experiment	D	8	05Experiment	57.5	7.5	52.5	4	5
1668	3	5	Experiment	D	9	05Experiment	28.5	7.5	45.5	4	5
1684	3	5	Experiment	D	10	05Experiment	45.5	7.5	43.5	4	5
1700	3	5	Experiment	D	11	05Experiment	51.5	7.5	43	4	5
1716	3	5	Experiment	D	12	05Experiment	55	7.5	44	4	5
1732	3	5	Experiment	D	13	05Experiment	33	7.5	31.5	4	5
1748	3	5	Experiment	D	14	05Experiment	48	7.5	45.5	4	5
1764	3	5	Experiment	D	15	05Experiment	49.5	7.5	44.5	4	5
1780	3	5	Experiment	D	16	05Experiment	50	7.5	44.5	4	5
1796	3	5	Experiment	D	17	05Experiment	49.5	7.5	45.5	4	5
1812	3	5	Experiment	D	18	05Experiment	34.5	7.5	42.5	4	5
1828	3	5	Experiment	D	19	05Experiment	58	7.5	51.5	4	5
1844	3	5	Experiment	D	20	05Experiment	50	7.5	44	4	5
1860	3	5	Experiment	D	21	05Experiment	16.5	7.5	19.5	4	5
1876	3	5	Experiment	D	22	05Experiment	44.5	7.5	53	4	5
1892	3	5	Experiment	D	23	05Experiment	54.5	7.5	50	4	5
1908	3	5	Experiment	D	24	05Experiment	61	7.5	55	4	5
1541	3	5	Experiment	E	1	05Experiment	46	9.5	56.5	5	5
1557	3	5	Experiment	E	2	05Experiment	42	9.5	43	5	5
1573	3	5	Experiment	E	3	05Experiment	52.5	9.5	48.5	5	5
1589	3	5	Experiment	E	4	05Experiment	35	9.5	18	5	5
1605	3	5	Experiment	E	5	05Experiment	35	9.5	34.5	5	5
1621	3	5	Experiment	E	6	05Experiment	56.5	9.5	59	5	5
1637	3	5	Experiment	E	7	05Experiment	46	9.5	40	5	5
1653	3	5	Experiment	E	8	05Experiment	39	9.5	37	5	5
1669	3	5	Experiment	E	9	05Experiment	40	9.5	35.5	5	5
1685	3	5	Experiment	E	10	05Experiment	43	9.5	40	5	5
1701	3	5	Experiment	E	11	05Experiment	52	9.5	51.5	5	5
1717	3	5	Experiment	E	12	05Experiment	48	9.5	38.5	5	5
1733	3	5	Experiment	E	13	05Experiment	55.5	9.5	63.5	5	5
1749	3	5	Experiment	E	14	05Experiment	46	9.5	45	5	5
1765	3	5	Experiment	E	15	05Experiment	35.5	9.5	22.5	5	5
1781	3	5	Experiment	E	16	05Experiment	52.5	9.5	46	5	5
1797	3	5	Experiment	E	17	05Experiment	62	9.5	70	5	5
1813	3	5	Experiment	E	18	05Experiment	46	9.5	42.5	5	5
1829	3	5	Experiment	E	19	05Experiment	44.5	9.5	45	5	5
1845	3	5	Experiment	E	20	05Experiment	43	9.5	39.5	5	5
1861	3	5	Experiment	E	21	05Experiment	46	9.5	44.5	5	5
1877	3	5	Experiment	E	22	05Experiment	46	9.5	40	5	5
1893	3	5	Experiment	E	23	05Experiment	50	9.5	56.5	5	5
1909	3	5	Experiment	E	24	05Experiment	36.5	9.5	44	5	5
1542	3	5	Experiment	F	1	05Experiment	41.5	11.5	41.5	6	5
1558	3	5	Experiment	F	2	05Experiment	43.5	11.5	41.5	6	5
1574	3	5	Experiment	F	3	05Experiment	38	11.5	37.5	6	5
1590	3	5	Experiment	F	4	05Experiment	37	11.5	41	6	5
1606	3	5	Experiment	F	5	05Experiment	41.5	11.5	42.5	6	5
1622	3	5	Experiment	F	6	05Experiment	40	11.5	38.5	6	5
1638	3	5	Experiment	F	7	05Experiment	44.5	11.5	40	6	5
1654	3	5	Experiment	F	8	05Experiment	41.5	11.5	42.5	6	5
1670	3	5	Experiment	F	9	05Experiment	1.5	11.5	5.5	6	5
1686	3	5	Experiment	F	10	05Experiment	16	11.5	22.5	6	5
1702	3	5	Experiment	F	11	05Experiment	45.5	11.5	43.5	6	5
1718	3	5	Experiment	F	12	05Experiment	42.5	11.5	39.5	6	5
1734	3	5	Experiment	F	13	05Experiment	51.5	11.5	56	6	5
1750	3	5	Experiment	F	14	05Experiment	48.5	11.5	44	6	5
1766	3	5	Experiment	F	15	05Experiment	46	11.5	42	6	5
1782	3	5	Experiment	F	16	05Experiment	49	11.5	44	6	5
1798	3	5	Experiment	F	17	05Experiment	43	11.5	40.5	6	5
1814	3	5	Experiment	F	18	05Experiment	50	11.5	43	6	5
1830	3	5	Experiment	F	19	05Experiment	46.5	11.5	42	6	5
1846	3	5	Experiment	F	20	05Experiment	56.5	11.5	48.5	6	5
1862	3	5	Experiment	F	21	05Experiment	48	11.5	43	6	5
1878	3	5	Experiment	F	22	05Experiment	52	11.5	57.5	6	5
1894	3	5	Experiment	F	23	05Experiment	42.5	11.5	52.5	6	5
1910	3	5	Experiment	F	24	05Experiment	55	11.5	51.5	6	5
1543	3	5	Experiment	G	1	05Experiment	57	13.5	68.5	7	5
1559	3	5	Experiment	G	2	05Experiment	38	13.5	36.5	7	5
1575	3	5	Experiment	G	3	05Experiment	36.5	13.5	30	7	5
1591	3	5	Experiment	G	4	05Experiment	38.5	13.5	40	7	5
1607	3	5	Experiment	G	5	05Experiment	39	13.5	37	7	5
1623	3	5	Experiment	G	6	05Experiment	41	13.5	38	7	5
1639	3	5	Experiment	G	7	05Experiment	43.5	13.5	39.5	7	5
1655	3	5	Experiment	G	8	05Experiment	43.5	13.5	40.5	7	5
1671	3	5	Experiment	G	9	05Experiment	38	13.5	31	7	5
1687	3	5	Experiment	G	10	05Experiment	44.5	13.5	39	7	5
1703	3	5	Experiment	G	11	05Experiment	5	13.5	4.5	7	5
1719	3	5	Experiment	G	12	05Experiment	48	13.5	43	7	5
1735	3	5	Experiment	G	13	05Experiment	45.5	13.5	39	7	5
1751	3	5	Experiment	G	14	05Experiment	51.5	13.5	53.5	7	5
1767	3	5	Experiment	G	15	05Experiment	46	13.5	41	7	5
1783	3	5	Experiment	G	16	05Experiment	46.5	13.5	40	7	5
1799	3	5	Experiment	G	17	05Experiment	47	13.5	42	7	5
1815	3	5	Experiment	G	18	05Experiment	47	13.5	42	7	5
1831	3	5	Experiment	G	19	05Experiment	53	13.5	43.5	7	5
1847	3	5	Experiment	G	20	05Experiment	50.5	13.5	43	7	5
1863	3	5	Experiment	G	21	05Experiment	1	13.5	39.5	7	5
1879	3	5	Experiment	G	22	05Experiment	45.5	13.5	40	7	5
1895	3	5	Experiment	G	23	05Experiment	63	13.5	75.5	7	5
1911	3	5	Experiment	G	24	05Experiment	52	13.5	45	7	5
1544	3	5	Experiment	H	1	05Experiment	44	15.5	51.5	8	5
1560	3	5	Experiment	H	2	05Experiment	41	15.5	42.5	8	5
1576	3	5	Experiment	H	3	05Experiment	42.5	15.5	36.5	8	5
1592	3	5	Experiment	H	4	05Experiment	36.5	15.5	39	8	5
1608	3	5	Experiment	H	5	05Experiment	40	15.5	36	8	5
1624	3	5	Experiment	H	6	05Experiment	37.5	15.5	33.5	8	5
1640	3	5	Experiment	H	7	05Experiment	44	15.5	37	8	5
1656	3	5	Experiment	H	8	05Experiment	42	15.5	36.5	8	5
1672	3	5	Experiment	H	9	05Experiment	46.5	15.5	40.5	8	5
1688	3	5	Experiment	H	10	05Experiment	39.5	15.5	38.5	8	5
1704	3	5	Experiment	H	11	05Experiment	40	15.5	40	8	5
1720	3	5	Experiment	H	12	05Experiment	40.5	15.5	40.5	8	5
1736	3	5	Experiment	H	13	05Experiment	49	15.5	45	8	5
1752	3	5	Experiment	H	14	05Experiment	25.5	15.5	24.5	8	5
1768	3	5	Experiment	H	15	05Experiment	32	15.5	23.5	8	5
1784	3	5	Experiment	H	16	05Experiment	43	15.5	39.5	8	5
1800	3	5	Experiment	H	17	05Experiment	42.5	15.5	39	8	5
1816	3	5	Experiment	H	18	05Experiment	37.5	15.5	37	8	5
1832	3	5	Experiment	H	19	05Experiment	49.5	15.5	44	8	5
1848	3	5	Experiment	H	20	05Experiment	48	15.5	39.5	8	5
1864	3	5	Experiment	H	21	05Experiment	53	15.5	46	8	5
1880	3	5	Experiment	H	22	05Experiment	43.5	15.5	37	8	5
1896	3	5	Experiment	H	23	05Experiment	41	15.5	38	8	5
1912	3	5	Experiment	H	24	05Experiment	49.5	15.5	43.5	8	5
1545	3	5	Experiment	I	1	05Experiment	46.5	17.5	43.5	9	5
1561	3	5	Experiment	I	2	05Experiment	32	17.5	31	9	5
1577	3	5	Experiment	I	3	05Experiment	36.5	17.5	32.5	9	5
1593	3	5	Experiment	I	4	05Experiment	32.5	17.5	34.5	9	5
1609	3	5	Experiment	I	5	05Experiment	34.5	17.5	31.5	9	5
1625	3	5	Experiment	I	6	05Experiment	39	17.5	32.5	9	5
1641	3	5	Experiment	I	7	05Experiment	48	17.5	42	9	5
1657	3	5	Experiment	I	8	05Experiment	38.5	17.5	36	9	5
1673	3	5	Experiment	I	9	05Experiment	49	17.5	45	9	5
1689	3	5	Experiment	I	10	05Experiment	41.5	17.5	35	9	5
1705	3	5	Experiment	I	11	05Experiment	34	17.5	35	9	5
1721	3	5	Experiment	I	12	05Experiment	36.5	17.5	37.5	9	5
1737	3	5	Experiment	I	13	05Experiment	50	17.5	43	9	5
1753	3	5	Experiment	I	14	05Experiment	38	17.5	36.5	9	5
1769	3	5	Experiment	I	15	05Experiment	15	17.5	13.5	9	5
1785	3	5	Experiment	I	16	05Experiment	37.5	17.5	36.5	9	5
1801	3	5	Experiment	I	17	05Experiment	40.5	17.5	36	9	5
1817	3	5	Experiment	I	18	05Experiment	38.5	17.5	38.5	9	5
1833	3	5	Experiment	I	19	05Experiment	52	17.5	45.5	9	5
1849	3	5	Experiment	I	20	05Experiment	41	17.5	37	9	5
1865	3	5	Experiment	I	21	05Experiment	44	17.5	36	9	5
1881	3	5	Experiment	I	22	05Experiment	41.5	17.5	41	9	5
1897	3	5	Experiment	I	23	05Experiment	9.5	17.5	16.5	9	5
1913	3	5	Experiment	I	24	05Experiment	38.5	17.5	55	9	5
1546	3	5	Experiment	J	1	05Experiment	42	19.5	43	10	5
1562	3	5	Experiment	J	2	05Experiment	39	19.5	38.5	10	5
1578	3	5	Experiment	J	3	05Experiment	41.5	19.5	35.5	10	5
1594	3	5	Experiment	J	4	05Experiment	32.5	19.5	36.5	10	5
1610	3	5	Experiment	J	5	05Experiment	32	19.5	29.5	10	5
1626	3	5	Experiment	J	6	05Experiment	38	19.5	33.5	10	5
1642	3	5	Experiment	J	7	05Experiment	47.5	19.5	43	10	5
1658	3	5	Experiment	J	8	05Experiment	39	19.5	35	10	5
1674	3	5	Experiment	J	9	05Experiment	35.5	19.5	35.5	10	5
1690	3	5	Experiment	J	10	05Experiment	32.5	19.5	34	10	5
1706	3	5	Experiment	J	11	05Experiment	34.5	19.5	36.5	10	5
1722	3	5	Experiment	J	12	05Experiment	32	19.5	36	10	5
1738	3	5	Experiment	J	13	05Experiment	37	19.5	32.5	10	5
1754	3	5	Experiment	J	14	05Experiment	40.5	19.5	35	10	5
1770	3	5	Experiment	J	15	05Experiment	31.5	19.5	32	10	5
1786	3	5	Experiment	J	16	05Experiment	40.5	19.5	34.5	10	5
1802	3	5	Experiment	J	17	05Experiment	39	19.5	37	10	5
1818	3	5	Experiment	J	18	05Experiment	40.5	19.5	36.5	10	5
1834	3	5	Experiment	J	19	05Experiment	51	19.5	56	10	5
1850	3	5	Experiment	J	20	05Experiment	5	19.5	5	10	5
1866	3	5	Experiment	J	21	05Experiment	29.5	19.5	34.5	10	5
1882	3	5	Experiment	J	22	05Experiment	37	19.5	34	10	5
1898	3	5	Experiment	J	23	05Experiment	35	19.5	32.5	10	5
1914	3	5	Experiment	J	24	05Experiment	44	19.5	43.5	10	5
1547	3	5	Experiment	K	1	05Experiment	42	21.5	42.5	11	5
1563	3	5	Experiment	K	2	05Experiment	35.5	21.5	37	11	5
1579	3	5	Experiment	K	3	05Experiment	35	21.5	33.5	11	5
1595	3	5	Experiment	K	4	05Experiment	33	21.5	31.5	11	5
1611	3	5	Experiment	K	5	05Experiment	38.5	21.5	35.5	11	5
1627	3	5	Experiment	K	6	05Experiment	37.5	21.5	32	11	5
1643	3	5	Experiment	K	7	05Experiment	42.5	21.5	41	11	5
1659	3	5	Experiment	K	8	05Experiment	37	21.5	34.5	11	5
1675	3	5	Experiment	K	9	05Experiment	40	21.5	35.5	11	5
1691	3	5	Experiment	K	10	05Experiment	39	21.5	33.5	11	5
1707	3	5	Experiment	K	11	05Experiment	37.5	21.5	36.5	11	5
1723	3	5	Experiment	K	12	05Experiment	39	21.5	35.5	11	5
1739	3	5	Experiment	K	13	05Experiment	36	21.5	29.5	11	5
1755	3	5	Experiment	K	14	05Experiment	42.5	21.5	32.5	11	5
1771	3	5	Experiment	K	15	05Experiment	7	21.5	5.5	11	5
1787	3	5	Experiment	K	16	05Experiment	41.5	21.5	38.5	11	5
1803	3	5	Experiment	K	17	05Experiment	19	21.5	20	11	5
1819	3	5	Experiment	K	18	05Experiment	42.5	21.5	33	11	5
1835	3	5	Experiment	K	19	05Experiment	26	21.5	24	11	5
1851	3	5	Experiment	K	20	05Experiment	41	21.5	35.5	11	5
1867	3	5	Experiment	K	21	05Experiment	31	21.5	26.5	11	5
1883	3	5	Experiment	K	22	05Experiment	37.5	21.5	38.5	11	5
1899	3	5	Experiment	K	23	05Experiment	39	21.5	36.5	11	5
1915	3	5	Experiment	K	24	05Experiment	35.5	21.5	45	11	5
1548	3	5	Experiment	L	1	05Experiment	41	23.5	41.5	12	5
1564	3	5	Experiment	L	2	05Experiment	34.5	23.5	35.5	12	5
1580	3	5	Experiment	L	3	05Experiment	32.5	23.5	32	12	5
1596	3	5	Experiment	L	4	05Experiment	34	23.5	32	12	5
1612	3	5	Experiment	L	5	05Experiment	32	23.5	31.5	12	5
1628	3	5	Experiment	L	6	05Experiment	38.5	23.5	30	12	5
1644	3	5	Experiment	L	7	05Experiment	36	23.5	31	12	5
1660	3	5	Experiment	L	8	05Experiment	36.5	23.5	34.5	12	5
1676	3	5	Experiment	L	9	05Experiment	40	23.5	39	12	5
1692	3	5	Experiment	L	10	05Experiment	36.5	23.5	32	12	5
1708	3	5	Experiment	L	11	05Experiment	15.5	23.5	23	12	5
1724	3	5	Experiment	L	12	05Experiment	41.5	23.5	36	12	5
1740	3	5	Experiment	L	13	05Experiment	13.5	23.5	27.5	12	5
1756	3	5	Experiment	L	14	05Experiment	21.5	23.5	25.5	12	5
1772	3	5	Experiment	L	15	05Experiment	40	23.5	36	12	5
1788	3	5	Experiment	L	16	05Experiment	0	23.5	0	12	5
1804	3	5	Experiment	L	17	05Experiment	43.5	23.5	37.5	12	5
1820	3	5	Experiment	L	18	05Experiment	13	23.5	15.5	12	5
1836	3	5	Experiment	L	19	05Experiment	41	23.5	40.5	12	5
1852	3	5	Experiment	L	20	05Experiment	0	23.5	0	12	5
1868	3	5	Experiment	L	21	05Experiment	33.5	23.5	36.5	12	5
1884	3	5	Experiment	L	22	05Experiment	0	23.5	2	12	5
1900	3	5	Experiment	L	23	05Experiment	31	23.5	42.5	12	5
1916	3	5	Experiment	L	24	05Experiment	42.5	23.5	44	12	5
1549	3	5	Experiment	M	1	05Experiment	37.5	25.5	37	13	5
1565	3	5	Experiment	M	2	05Experiment	35	25.5	32.5	13	5
1581	3	5	Experiment	M	3	05Experiment	38.5	25.5	39	13	5
1597	3	5	Experiment	M	4	05Experiment	28	25.5	33	13	5
1613	3	5	Experiment	M	5	05Experiment	37	25.5	34.5	13	5
1629	3	5	Experiment	M	6	05Experiment	31	25.5	31	13	5
1645	3	5	Experiment	M	7	05Experiment	32.5	25.5	35	13	5
1661	3	5	Experiment	M	8	05Experiment	41	25.5	43	13	5
1677	3	5	Experiment	M	9	05Experiment	38.5	25.5	35	13	5
1693	3	5	Experiment	M	10	05Experiment	34.5	25.5	33	13	5
1709	3	5	Experiment	M	11	05Experiment	36	25.5	39.5	13	5
1725	3	5	Experiment	M	12	05Experiment	36	25.5	39	13	5
1741	3	5	Experiment	M	13	05Experiment	38.5	25.5	34.5	13	5
1757	3	5	Experiment	M	14	05Experiment	34.5	25.5	36.5	13	5
1773	3	5	Experiment	M	15	05Experiment	38	25.5	35.5	13	5
1789	3	5	Experiment	M	16	05Experiment	42	25.5	34	13	5
1805	3	5	Experiment	M	17	05Experiment	41.5	25.5	36.5	13	5
1821	3	5	Experiment	M	18	05Experiment	38	25.5	35	13	5
1837	3	5	Experiment	M	19	05Experiment	32.5	25.5	33	13	5
1853	3	5	Experiment	M	20	05Experiment	37	25.5	32.5	13	5
1869	3	5	Experiment	M	21	05Experiment	37.5	25.5	37	13	5
1885	3	5	Experiment	M	22	05Experiment	31.5	25.5	32.5	13	5
1901	3	5	Experiment	M	23	05Experiment	38	25.5	38	13	5
1917	3	5	Experiment	M	24	05Experiment	31.5	25.5	40.5	13	5
1550	3	5	Experiment	N	1	05Experiment	29	27.5	32	14	5
1566	3	5	Experiment	N	2	05Experiment	34	27.5	25	14	5
1582	3	5	Experiment	N	3	05Experiment	35.5	27.5	15	14	5
1598	3	5	Experiment	N	4	05Experiment	34.5	27.5	25	14	5
1614	3	5	Experiment	N	5	05Experiment	35.5	27.5	33	14	5
1630	3	5	Experiment	N	6	05Experiment	34.5	27.5	29	14	5
1646	3	5	Experiment	N	7	05Experiment	36.5	27.5	36	14	5
1662	3	5	Experiment	N	8	05Experiment	34	27.5	35	14	5
1678	3	5	Experiment	N	9	05Experiment	32	27.5	30	14	5
1694	3	5	Experiment	N	10	05Experiment	36.5	27.5	33.5	14	5
1710	3	5	Experiment	N	11	05Experiment	31.5	27.5	30.5	14	5
1726	3	5	Experiment	N	12	05Experiment	35	27.5	35	14	5
1742	3	5	Experiment	N	13	05Experiment	8	27.5	16.5	14	5
1758	3	5	Experiment	N	14	05Experiment	5	27.5	7	14	5
1774	3	5	Experiment	N	15	05Experiment	38	27.5	34	14	5
1790	3	5	Experiment	N	16	05Experiment	42.5	27.5	36	14	5
1806	3	5	Experiment	N	17	05Experiment	38.5	27.5	34.5	14	5
1822	3	5	Experiment	N	18	05Experiment	36	27.5	33.5	14	5
1838	3	5	Experiment	N	19	05Experiment	36.5	27.5	34.5	14	5
1854	3	5	Experiment	N	20	05Experiment	36.5	27.5	34	14	5
1870	3	5	Experiment	N	21	05Experiment	35	27.5	32.5	14	5
1886	3	5	Experiment	N	22	05Experiment	37.5	27.5	34.5	14	5
1902	3	5	Experiment	N	23	05Experiment	35	27.5	37.5	14	5
1918	3	5	Experiment	N	24	05Experiment	45.5	27.5	47	14	5
1551	3	5	Experiment	O	1	05Experiment	20.5	29.5	11	15	5
1567	3	5	Experiment	O	2	05Experiment	27	29.5	26.5	15	5
1583	3	5	Experiment	O	3	05Experiment	30	29.5	22.5	15	5
1599	3	5	Experiment	O	4	05Experiment	19	29.5	22.5	15	5
1615	3	5	Experiment	O	5	05Experiment	25.5	29.5	17	15	5
1631	3	5	Experiment	O	6	05Experiment	33	29.5	33	15	5
1647	3	5	Experiment	O	7	05Experiment	34	29.5	28	15	5
1663	3	5	Experiment	O	8	05Experiment	31.5	29.5	31	15	5
1679	3	5	Experiment	O	9	05Experiment	30.5	29.5	39.5	15	5
1695	3	5	Experiment	O	10	05Experiment	32	29.5	33	15	5
1711	3	5	Experiment	O	11	05Experiment	36	29.5	38	15	5
1727	3	5	Experiment	O	12	05Experiment	30.5	29.5	30.5	15	5
1743	3	5	Experiment	O	13	05Experiment	28	29.5	29	15	5
1759	3	5	Experiment	O	14	05Experiment	28	29.5	32	15	5
1775	3	5	Experiment	O	15	05Experiment	28	29.5	34	15	5
1791	3	5	Experiment	O	16	05Experiment	35	29.5	34	15	5
1807	3	5	Experiment	O	17	05Experiment	34	29.5	42	15	5
1823	3	5	Experiment	O	18	05Experiment	28.5	29.5	28.5	15	5
1839	3	5	Experiment	O	19	05Experiment	34	29.5	36	15	5
1855	3	5	Experiment	O	20	05Experiment	16	29.5	19	15	5
1871	3	5	Experiment	O	21	05Experiment	28.5	29.5	39	15	5
1887	3	5	Experiment	O	22	05Experiment	23	29.5	22	15	5
1903	3	5	Experiment	O	23	05Experiment	35.5	29.5	42	15	5
1919	3	5	Experiment	O	24	05Experiment	40.5	29.5	48	15	5
1552	3	5	Experiment	P	1	05Experiment	43.5	31.5	52	16	5
1568	3	5	Experiment	P	2	05Experiment	44	31.5	42.5	16	5
1584	3	5	Experiment	P	3	05Experiment	43.5	31.5	40.5	16	5
1600	3	5	Experiment	P	4	05Experiment	42	31.5	43.5	16	5
1616	3	5	Experiment	P	5	05Experiment	42	31.5	42	16	5
1632	3	5	Experiment	P	6	05Experiment	40	31.5	39.5	16	5
1648	3	5	Experiment	P	7	05Experiment	41.5	31.5	42	16	5
1664	3	5	Experiment	P	8	05Experiment	41.5	31.5	45.5	16	5
1680	3	5	Experiment	P	9	05Experiment	15.5	31.5	19	16	5
1696	3	5	Experiment	P	10	05Experiment	43.5	31.5	51	16	5
1712	3	5	Experiment	P	11	05Experiment	46	31.5	45	16	5
1728	3	5	Experiment	P	12	05Experiment	51	31.5	52.5	16	5
1744	3	5	Experiment	P	13	05Experiment	7	31.5	11.5	16	5
1760	3	5	Experiment	P	14	05Experiment	43	31.5	44.5	16	5
1776	3	5	Experiment	P	15	05Experiment	41	31.5	54	16	5
1792	3	5	Experiment	P	16	05Experiment	46	31.5	47.5	16	5
1808	3	5	Experiment	P	17	05Experiment	41.5	31.5	40.5	16	5
1824	3	5	Experiment	P	18	05Experiment	45	31.5	44	16	5
1840	3	5	Experiment	P	19	05Experiment	30	31.5	26.5	16	5
1856	3	5	Experiment	P	20	05Experiment	48.5	31.5	47	16	5
1872	3	5	Experiment	P	21	05Experiment	43.5	31.5	57	16	5
1888	3	5	Experiment	P	22	05Experiment	42	31.5	49.5	16	5
1904	3	5	Experiment	P	23	05Experiment	7.5	31.5	27	16	5
1920	3	5	Experiment	P	24	05Experiment	45.5	31.5	49	16	5
1921	3	6	Experiment	A	1	06Experiment	39	1.5	51.5	1	6
1937	3	6	Experiment	A	2	06Experiment	37.5	1.5	58	1	6
1953	3	6	Experiment	A	3	06Experiment	38	1.5	51	1	6
1969	3	6	Experiment	A	4	06Experiment	42	1.5	50.5	1	6
1985	3	6	Experiment	A	5	06Experiment	60	1.5	65.5	1	6
2001	3	6	Experiment	A	6	06Experiment	52.5	1.5	56	1	6
2017	3	6	Experiment	A	7	06Experiment	58.5	1.5	68	1	6
2033	3	6	Experiment	A	8	06Experiment	43.5	1.5	50	1	6
2049	3	6	Experiment	A	9	06Experiment	38.5	1.5	39.5	1	6
2065	3	6	Experiment	A	10	06Experiment	48.5	1.5	48	1	6
2081	3	6	Experiment	A	11	06Experiment	54.5	1.5	56	1	6
2097	3	6	Experiment	A	12	06Experiment	63.5	1.5	66.5	1	6
2113	3	6	Experiment	A	13	06Experiment	59.5	1.5	58.5	1	6
2129	3	6	Experiment	A	14	06Experiment	57	1.5	60	1	6
2145	3	6	Experiment	A	15	06Experiment	54.5	1.5	56.5	1	6
2161	3	6	Experiment	A	16	06Experiment	54.5	1.5	58.5	1	6
2177	3	6	Experiment	A	17	06Experiment	56.5	1.5	55	1	6
2193	3	6	Experiment	A	18	06Experiment	77	1.5	87.5	1	6
2209	3	6	Experiment	A	19	06Experiment	50.5	1.5	52.5	1	6
2225	3	6	Experiment	A	20	06Experiment	55.5	1.5	55	1	6
2241	3	6	Experiment	A	21	06Experiment	59.5	1.5	59	1	6
2257	3	6	Experiment	A	22	06Experiment	58.5	1.5	59.5	1	6
2273	3	6	Experiment	A	23	06Experiment	56	1.5	60.5	1	6
2289	3	6	Experiment	A	24	06Experiment	62.5	1.5	75.5	1	6
1922	3	6	Experiment	B	1	06Experiment	40	3.5	52.5	2	6
1938	3	6	Experiment	B	2	06Experiment	33.5	3.5	38.5	2	6
1954	3	6	Experiment	B	3	06Experiment	33.5	3.5	38	2	6
1970	3	6	Experiment	B	4	06Experiment	49	3.5	65	2	6
1986	3	6	Experiment	B	5	06Experiment	39.5	3.5	44.5	2	6
2002	3	6	Experiment	B	6	06Experiment	41	3.5	47	2	6
2018	3	6	Experiment	B	7	06Experiment	44.5	3.5	47	2	6
2034	3	6	Experiment	B	8	06Experiment	46	3.5	50.5	2	6
2050	3	6	Experiment	B	9	06Experiment	32	3.5	33.5	2	6
2066	3	6	Experiment	B	10	06Experiment	38	3.5	30.5	2	6
2082	3	6	Experiment	B	11	06Experiment	46.5	3.5	51	2	6
2098	3	6	Experiment	B	12	06Experiment	47	3.5	50.5	2	6
2114	3	6	Experiment	B	13	06Experiment	63	3.5	63.5	2	6
2130	3	6	Experiment	B	14	06Experiment	52	3.5	49	2	6
2146	3	6	Experiment	B	15	06Experiment	49	3.5	47.5	2	6
2162	3	6	Experiment	B	16	06Experiment	52.5	3.5	48.5	2	6
2178	3	6	Experiment	B	17	06Experiment	36.5	3.5	39.5	2	6
2194	3	6	Experiment	B	18	06Experiment	49	3.5	49	2	6
2210	3	6	Experiment	B	19	06Experiment	53.5	3.5	49.5	2	6
2226	3	6	Experiment	B	20	06Experiment	47.5	3.5	48.5	2	6
2242	3	6	Experiment	B	21	06Experiment	52	3.5	55.5	2	6
2258	3	6	Experiment	B	22	06Experiment	54	3.5	52	2	6
2274	3	6	Experiment	B	23	06Experiment	52	3.5	55	2	6
2290	3	6	Experiment	B	24	06Experiment	56	3.5	59.5	2	6
1923	3	6	Experiment	C	1	06Experiment	41	5.5	50.5	3	6
1939	3	6	Experiment	C	2	06Experiment	34	5.5	44.5	3	6
1955	3	6	Experiment	C	3	06Experiment	42	5.5	42.5	3	6
1971	3	6	Experiment	C	4	06Experiment	21.5	5.5	33.5	3	6
1987	3	6	Experiment	C	5	06Experiment	54.5	5.5	59.5	3	6
2003	3	6	Experiment	C	6	06Experiment	43.5	5.5	50	3	6
2019	3	6	Experiment	C	7	06Experiment	45	5.5	47.5	3	6
2035	3	6	Experiment	C	8	06Experiment	18.5	5.5	19.5	3	6
2051	3	6	Experiment	C	9	06Experiment	47.5	5.5	43	3	6
2067	3	6	Experiment	C	10	06Experiment	43	5.5	46	3	6
2083	3	6	Experiment	C	11	06Experiment	48.5	5.5	45	3	6
2099	3	6	Experiment	C	12	06Experiment	59	5.5	60.5	3	6
2115	3	6	Experiment	C	13	06Experiment	47	5.5	45	3	6
2131	3	6	Experiment	C	14	06Experiment	48.5	5.5	47	3	6
2147	3	6	Experiment	C	15	06Experiment	47	5.5	41	3	6
2163	3	6	Experiment	C	16	06Experiment	49.5	5.5	46.5	3	6
2179	3	6	Experiment	C	17	06Experiment	49	5.5	45.5	3	6
2195	3	6	Experiment	C	18	06Experiment	49.5	5.5	46	3	6
2211	3	6	Experiment	C	19	06Experiment	56.5	5.5	67	3	6
2227	3	6	Experiment	C	20	06Experiment	50.5	5.5	46.5	3	6
2243	3	6	Experiment	C	21	06Experiment	49.5	5.5	48.5	3	6
2259	3	6	Experiment	C	22	06Experiment	53.5	5.5	56	3	6
2275	3	6	Experiment	C	23	06Experiment	39	5.5	37	3	6
2291	3	6	Experiment	C	24	06Experiment	56	5.5	60.5	3	6
1924	3	6	Experiment	D	1	06Experiment	38.5	7.5	47	4	6
1940	3	6	Experiment	D	2	06Experiment	35.5	7.5	46	4	6
1956	3	6	Experiment	D	3	06Experiment	38	7.5	41.5	4	6
1972	3	6	Experiment	D	4	06Experiment	35	7.5	44	4	6
1988	3	6	Experiment	D	5	06Experiment	30.5	7.5	34	4	6
2004	3	6	Experiment	D	6	06Experiment	41	7.5	38.5	4	6
[truncated: 1,458 more rows]

## Sheet: Outliers_YNBbased
GREY: ignored due to pinning mistake
				Log Ratio		Z score							mean LogR for each plate		stddev of the mean LogR for each plate
Run-Plate:	r1P1	Cell:	A4	LogR:	-2.42354	#Sigma:	3.701	-	Expt:	3.5	Ctrl:	39.5	mean:	-0.573	stddev:	0.5
Run-Plate:	r1P1	Cell:	C20	LogR:	-2.03688	#Sigma:	2.928	-	Expt:	6	Ctrl:	46	mean:	-0.573	stddev:	0.5
Run-Plate:	r1P1	Cell:	C4	LogR:	-2.16905	#Sigma:	3.192	-	Expt:	4	Ctrl:	35	mean:	-0.573	stddev:	0.5
Run-Plate:	r1P1	Cell:	F2	LogR:	-1.58045	#Sigma:	2.015	-	Expt:	7	Ctrl:	34	mean:	-0.573	stddev:	0.5
Run-Plate:	r1P1	Cell:	F9	LogR:	-2.07944	#Sigma:	3.013	-	Expt:	1	Ctrl:	8	mean:	-0.573	stddev:	0.5
Run-Plate:	r1P1	Cell:	G1	LogR:	-3.49651	#Sigma:	5.847	-	Expt:	1	Ctrl:	33	mean:	-0.573	stddev:	0.5
Run-Plate:	r1P1	Cell:	H1	LogR:	-2.26868	#Sigma:	3.391	-	Expt:	4.5	Ctrl:	43.5	mean:	-0.573	stddev:	0.5
Run-Plate:	r1P1	Cell:	I1	LogR:	-4.30407	#Sigma:	7.462	-	Expt:	0.5	Ctrl:	37	mean:	-0.573	stddev:	0.5
Run-Plate:	r1P1	Cell:	J1	LogR:	-1.76359	#Sigma:	2.381	-	Expt:	6	Ctrl:	35	mean:	-0.573	stddev:	0.5
Run-Plate:	r1P1	Cell:	J20	LogR:	-2.48491	#Sigma:	3.824	-	Expt:	0.5	Ctrl:	6	mean:	-0.573	stddev:	0.5
Run-Plate:	r1P1	Cell:	N1	LogR:	-2.26176	#Sigma:	3.378	-	Expt:	2.5	Ctrl:	24	mean:	-0.573	stddev:	0.5
Run-Plate:	r1P1	Cell:	O1	LogR:	-1.6946	#Sigma:	2.243	-	Expt:	4.5	Ctrl:	24.5	mean:	-0.573	stddev:	0.5
Run-Plate:	r1P1	Cell:	O20	LogR:	-2.8622	#Sigma:	4.578	-	Expt:	1	Ctrl:	17.5	mean:	-0.573	stddev:	0.5
Run-Plate:	r1P1	Cell:	P13	LogR:	-3.95124	#Sigma:	6.756	-	Expt:	0.5	Ctrl:	26	mean:	-0.573	stddev:	0.5
Run-Plate:	r1P1	Cell:	P23	LogR:	-2.02815	#Sigma:	2.91	-	Expt:	2.5	Ctrl:	19	mean:	-0.573	stddev:	0.5
Run-Plate:	r1P3	Cell:	B10	LogR:	0.859383	#Sigma:	2.795	+	Expt:	55.5	Ctrl:	23.5	mean:	-0.088	stddev:	0.339
Run-Plate:	r1P3	Cell:	C3	LogR:	0.590199	#Sigma:	2.001	+	Expt:	41.5	Ctrl:	23	mean:	-0.088	stddev:	0.339
Run-Plate:	r1P3	Cell:	D21	LogR:	-3.16407	#Sigma:	9.074	-	Expt:	1.5	Ctrl:	35.5	mean:	-0.088	stddev:	0.339
Run-Plate:	r1P3	Cell:	J20	LogR:	-0.875469	#Sigma:	2.323	-	Expt:	2.5	Ctrl:	6	mean:	-0.088	stddev:	0.339
Run-Plate:	r1P3	Cell:	J21	LogR:	-1.32176	#Sigma:	3.639	-	Expt:	2	Ctrl:	7.5	mean:	-0.088	stddev:	0.339
Run-Plate:	r1P3	Cell:	K15	LogR:	0.641854	#Sigma:	2.153	+	Expt:	9.5	Ctrl:	5	mean:	-0.088	stddev:	0.339
Run-Plate:	r1P3	Cell:	L3	LogR:	0.658056	#Sigma:	2.201	+	Expt:	28	Ctrl:	14.5	mean:	-0.088	stddev:	0.339
Run-Plate:	r1P3	Cell:	N1	LogR:	-0.780159	#Sigma:	2.042	-	Expt:	11	Ctrl:	24	mean:	-0.088	stddev:	0.339
Run-Plate:	r1P3	Cell:	O1	LogR:	-2.10006	#Sigma:	5.935	-	Expt:	3	Ctrl:	24.5	mean:	-0.088	stddev:	0.339
Run-Plate:	r1P3	Cell:	O20	LogR:	-0.990399	#Sigma:	2.662	-	Expt:	6.5	Ctrl:	17.5	mean:	-0.088	stddev:	0.339
Run-Plate:	r1P3	Cell:	P12	LogR:	-2.56495	#Sigma:	7.307	-	Expt:	0.5	Ctrl:	6.5	mean:	-0.088	stddev:	0.339
Run-Plate:	r1P3	Cell:	P19	LogR:	-0.803495	#Sigma:	2.111	-	Expt:	15	Ctrl:	33.5	mean:	-0.088	stddev:	0.339
Run-Plate:	r1P4	Cell:	D21	LogR:	-1.62362	#Sigma:	6.838	-	Expt:	7	Ctrl:	35.5	mean:	0.079	stddev:	0.249
Run-Plate:	r1P4	Cell:	E4	LogR:	-0.455476	#Sigma:	2.146	-	Expt:	13	Ctrl:	20.5	mean:	0.079	stddev:	0.249
Run-Plate:	r1P4	Cell:	I10	LogR:	-1.08876	#Sigma:	4.69	-	Expt:	17	Ctrl:	50.5	mean:	0.079	stddev:	0.249
Run-Plate:	r1P4	Cell:	J20	LogR:	-0.693147	#Sigma:	3.101	-	Expt:	3	Ctrl:	6	mean:	0.079	stddev:	0.249
Run-Plate:	r1P4	Cell:	K15	LogR:	0.641854	#Sigma:	2.26	+	Expt:	9.5	Ctrl:	5	mean:	0.079	stddev:	0.249
Run-Plate:	r1P4	Cell:	O1	LogR:	-0.847298	#Sigma:	3.72	-	Expt:	10.5	Ctrl:	24.5	mean:	0.079	stddev:	0.249
Run-Plate:	r1P4	Cell:	O20	LogR:	-0.419854	#Sigma:	2.003	-	Expt:	11.5	Ctrl:	17.5	mean:	0.079	stddev:	0.249
Run-Plate:	r1P4	Cell:	P12	LogR:	-2.56495	#Sigma:	10.618	-	Expt:	0.5	Ctrl:	6.5	mean:	0.079	stddev:	0.249
Run-Plate:	r1P5	Cell:	A21	LogR:	-2.07944	#Sigma:	5.729	-	Expt:	5.5	Ctrl:	44	mean:	-0.166	stddev:	0.334
Run-Plate:	r1P5	Cell:	B10	LogR:	0.544302	#Sigma:	2.127	+	Expt:	40.5	Ctrl:	23.5	mean:	-0.166	stddev:	0.334
Run-Plate:	r1P5	Cell:	D21	LogR:	-1.96009	#Sigma:	5.372	-	Expt:	5	Ctrl:	35.5	mean:	-0.166	stddev:	0.334
Run-Plate:	r1P5	Cell:	H14	LogR:	-1.36828	#Sigma:	3.6	-	Expt:	7	Ctrl:	27.5	mean:	-0.166	stddev:	0.334
Run-Plate:	r1P5	Cell:	J21	LogR:	-1.60944	#Sigma:	4.322	-	Expt:	1.5	Ctrl:	7.5	mean:	-0.166	stddev:	0.334
Run-Plate:	r1P5	Cell:	K15	LogR:	0.530628	#Sigma:	2.086	+	Expt:	8.5	Ctrl:	5	mean:	-0.166	stddev:	0.334
Run-Plate:	r1P5	Cell:	N1	LogR:	-1.23214	#Sigma:	3.192	-	Expt:	7	Ctrl:	24	mean:	-0.166	stddev:	0.334
Run-Plate:	r1P5	Cell:	N14	LogR:	-2.584	#Sigma:	7.24	-	Expt:	2	Ctrl:	26.5	mean:	-0.166	stddev:	0.334
Run-Plate:	r1P5	Cell:	N2	LogR:	-0.893818	#Sigma:	2.179	-	Expt:	9	Ctrl:	22	mean:	-0.166	stddev:	0.334
Run-Plate:	r1P5	Cell:	O1	LogR:	-2.28238	#Sigma:	6.336	-	Expt:	2.5	Ctrl:	24.5	mean:	-0.166	stddev:	0.334
Run-Plate:	r1P5	Cell:	O20	LogR:	-1.25276	#Sigma:	3.254	-	Expt:	5	Ctrl:	17.5	mean:	-0.166	stddev:	0.334
Run-Plate:	r1P5	Cell:	P1	LogR:	-0.926762	#Sigma:	2.278	-	Expt:	19	Ctrl:	48	mean:	-0.166	stddev:	0.334
Run-Plate:	r1P5	Cell:	P23	LogR:	-1.15268	#Sigma:	2.954	-	Expt:	6	Ctrl:	19	mean:	-0.166	stddev:	0.334
Run-Plate:	r2P2	Cell:	C4	LogR:	0	#Sigma:	3.699	+	Expt:	0	Ctrl:	12.5	mean:	-1.428	stddev:	0.386
Run-Plate:	r2P2	Cell:	F9	LogR:	0	#Sigma:	3.699	+	Expt:	0	Ctrl:	8	mean:	-1.428	stddev:	0.386
Run-Plate:	r2P2	Cell:	I23	LogR:	0	#Sigma:	3.699	+	Expt:	0	Ctrl:	13.5	mean:	-1.428	stddev:	0.386
Run-Plate:	r2P2	Cell:	J20	LogR:	0	#Sigma:	3.699	+	Expt:	0	Ctrl:	3	mean:	-1.428	stddev:	0.386
Run-Plate:	r2P2	Cell:	L13	LogR:	-2.94444	#Sigma:	3.929	-	Expt:	1	Ctrl:	19	mean:	-1.428	stddev:	0.386
Run-Plate:	r2P2	Cell:	L14	LogR:	-2.70805	#Sigma:	3.316	-	Expt:	2.5	Ctrl:	37.5	mean:	-1.428	stddev:	0.386
Run-Plate:	r2P2	Cell:	L18	LogR:	0	#Sigma:	3.699	+	Expt:	0	Ctrl:	18.5	mean:	-1.428	stddev:	0.386
Run-Plate:	r2P2	Cell:	L20	LogR:	0	#Sigma:	3.699	+	Expt:	0	Ctrl:	3.5	mean:	-1.428	stddev:	0.386
Run-Plate:	r2P2	Cell:	L3	LogR:	-2.54553	#Sigma:	2.895	-	Expt:	2	Ctrl:	25.5	mean:	-1.428	stddev:	0.386
Run-Plate:	r2P2	Cell:	N13	LogR:	0	#Sigma:	3.699	+	Expt:	0	Ctrl:	15.5	mean:	-1.428	stddev:	0.386
Run-Plate:	r2P2	Cell:	P13	LogR:	0	#Sigma:	3.699	+	Expt:	0	Ctrl:	14	mean:	-1.428	stddev:	0.386
Run-Plate:	r2P2	Cell:	P19	LogR:	0	#Sigma:	3.699	+	Expt:	0	Ctrl:	34.5	mean:	-1.428	stddev:	0.386
Run-Plate:	r2P2	Cell:	P23	LogR:	-3.61092	#Sigma:	5.655	-	Expt:	1	Ctrl:	37	mean:	-1.428	stddev:	0.386
Run-Plate:	r2P2	Cell:	P5	LogR:	-2.53016	#Sigma:	2.855	-	Expt:	4.5	Ctrl:	56.5	mean:	-1.428	stddev:	0.386
Run-Plate:	r2P2	Cell:	P9	LogR:	0	#Sigma:	3.699	+	Expt:	0	Ctrl:	22	mean:	-1.428	stddev:	0.386
Run-Plate:	r1P7	Cell:	B10	LogR:	0.784581	#Sigma:	2.389	+	Expt:	51.5	Ctrl:	23.5	mean:	0.173	stddev:	0.256
Run-Plate:	r1P7	Cell:	C18	LogR:	-1.68355	#Sigma:	7.252	-	Expt:	6.5	Ctrl:	35	mean:	0.173	stddev:	0.256
Run-Plate:	r1P7	Cell:	E5	LogR:	-0.517943	#Sigma:	2.699	-	Expt:	28	Ctrl:	47	mean:	0.173	stddev:	0.256
Run-Plate:	r1P7	Cell:	J20	LogR:	-0.693147	#Sigma:	3.383	-	Expt:	3	Ctrl:	6	mean:	0.173	stddev:	0.256
Run-Plate:	r1P7	Cell:	J21	LogR:	-1.60944	#Sigma:	6.963	-	Expt:	1.5	Ctrl:	7.5	mean:	0.173	stddev:	0.256
Run-Plate:	r1P7	Cell:	K14	LogR:	0.864997	#Sigma:	2.703	+	Expt:	47.5	Ctrl:	20	mean:	0.173	stddev:	0.256
Run-Plate:	r1P7	Cell:	K15	LogR:	1.1314	#Sigma:	3.744	+	Expt:	15.5	Ctrl:	5	mean:	0.173	stddev:	0.256
Run-Plate:	r1P7	Cell:	K21	LogR:	0.81093	#Sigma:	2.492	+	Expt:	31.5	Ctrl:	14	mean:	0.173	stddev:	0.256
Run-Plate:	r1P7	Cell:	L13	LogR:	0.706941	#Sigma:	2.086	+	Expt:	36.5	Ctrl:	18	mean:	0.173	stddev:	0.256
Run-Plate:	r1P7	Cell:	N14	LogR:	-0.834798	#Sigma:	3.937	-	Expt:	11.5	Ctrl:	26.5	mean:	0.173	stddev:	0.256
Run-Plate:	r1P7	Cell:	O1	LogR:	-1.40691	#Sigma:	6.172	-	Expt:	6	Ctrl:	24.5	mean:	0.173	stddev:	0.256
Run-Plate:	r1P7	Cell:	O14	LogR:	0.710847	#Sigma:	2.101	+	Expt:	28.5	Ctrl:	14	mean:	0.173	stddev:	0.256
Run-Plate:	r1P7	Cell:	O20	LogR:	-0.664976	#Sigma:	3.273	-	Expt:	9	Ctrl:	17.5	mean:	0.173	stddev:	0.256
Run-Plate:	r1P8	Cell:	B10	LogR:	0.912026	#Sigma:	3.204	+	Expt:	58.5	Ctrl:	23.5	mean:	0.159	stddev:	0.235
Run-Plate:	r1P8	Cell:	E5	LogR:	-0.554311	#Sigma:	3.035	-	Expt:	27	Ctrl:	47	mean:	0.159	stddev:	0.235
Run-Plate:	r1P8	Cell:	I14	LogR:	0.633249	#Sigma:	2.018	+	Expt:	40.5	Ctrl:	21.5	mean:	0.159	stddev:	0.235
Run-Plate:	r1P8	Cell:	J20	LogR:	-1.09861	#Sigma:	5.352	-	Expt:	2	Ctrl:	6	mean:	0.159	stddev:	0.235
Run-Plate:	r1P8	Cell:	J21	LogR:	-1.32176	#Sigma:	6.301	-	Expt:	2	Ctrl:	7.5	mean:	0.159	stddev:	0.235
Run-Plate:	r1P8	Cell:	K14	LogR:	0.654926	#Sigma:	2.11	+	Expt:	38.5	Ctrl:	20	mean:	0.159	stddev:	0.235
Run-Plate:	r1P8	Cell:	K21	LogR:	0.76214	#Sigma:	2.567	+	Expt:	30	Ctrl:	14	mean:	0.159	stddev:	0.235
Run-Plate:	r1P8	Cell:	O1	LogR:	-1.6946	#Sigma:	7.888	-	Expt:	4.5	Ctrl:	24.5	mean:	0.159	stddev:	0.235
Run-Plate:	r1P8	Cell:	O20	LogR:	-0.990399	#Sigma:	4.891	-	Expt:	6.5	Ctrl:	17.5	mean:	0.159	stddev:	0.235
Run-Plate:	r1P9	Cell:	B10	LogR:	0.831984	#Sigma:	2.117	+	Expt:	54	Ctrl:	23.5	mean:	0.29	stddev:	0.256
Run-Plate:	r1P9	Cell:	H13	LogR:	0.862706	#Sigma:	2.237	+	Expt:	54.5	Ctrl:	23	mean:	0.29	stddev:	0.256
Run-Plate:	r1P9	Cell:	J20	LogR:	-0.538997	#Sigma:	3.238	-	Expt:	3.5	Ctrl:	6	mean:	0.29	stddev:	0.256
Run-Plate:	r1P9	Cell:	J21	LogR:	-0.510826	#Sigma:	3.128	-	Expt:	4.5	Ctrl:	7.5	mean:	0.29	stddev:	0.256
Run-Plate:	r1P9	Cell:	K14	LogR:	1.02962	#Sigma:	2.889	+	Expt:	56	Ctrl:	20	mean:	0.29	stddev:	0.256
Run-Plate:	r1P9	Cell:	K15	LogR:	1.1314	#Sigma:	3.287	+	Expt:	15.5	Ctrl:	5	mean:	0.29	stddev:	0.256
Run-Plate:	r1P9	Cell:	L13	LogR:	1.0316	#Sigma:	2.897	+	Expt:	50.5	Ctrl:	18	mean:	0.29	stddev:	0.256
Run-Plate:	r1P9	Cell:	N2	LogR:	-0.257829	#Sigma:	2.14	-	Expt:	17	Ctrl:	22	mean:	0.29	stddev:	0.256
Run-Plate:	r1P9	Cell:	O1	LogR:	-1.49393	#Sigma:	6.968	-	Expt:	5.5	Ctrl:	24.5	mean:	0.29	stddev:	0.256
Run-Plate:	r1P9	Cell:	O20	LogR:	-0.559616	#Sigma:	3.319	-	Expt:	10	Ctrl:	17.5	mean:	0.29	stddev:	0.256
Run-Plate:	r1P9	Cell:	P12	LogR:	-0.77319	#Sigma:	4.153	-	Expt:	3	Ctrl:	6.5	mean:	0.29	stddev:	0.256
Run-Plate:	r1P10	Cell:	A16	LogR:	0.571786	#Sigma:	2.199	+	Expt:	93	Ctrl:	52.5	mean:	0.033	stddev:	0.245
Run-Plate:	r1P10	Cell:	A4	LogR:	-0.540806	#Sigma:	2.342	-	Expt:	23	Ctrl:	39.5	mean:	0.033	stddev:	0.245
Run-Plate:	r1P10	Cell:	B10	LogR:	0.822681	#Sigma:	3.223	+	Expt:	53.5	Ctrl:	23.5	mean:	0.033	stddev:	0.245
Run-Plate:	r1P10	Cell:	E21	LogR:	0.595509	#Sigma:	2.296	+	Expt:	39	Ctrl:	21.5	mean:	0.033	stddev:	0.245
Run-Plate:	r1P10	Cell:	F10	LogR:	0.834798	#Sigma:	3.273	+	Expt:	26.5	Ctrl:	11.5	mean:	0.033	stddev:	0.245
Run-Plate:	r1P10	Cell:	H13	LogR:	0.671168	#Sigma:	2.605	+	Expt:	45	Ctrl:	23	mean:	0.033	stddev:	0.245
Run-Plate:	r1P10	Cell:	I23	LogR:	-0.554997	#Sigma:	2.4	-	Expt:	15.5	Ctrl:	27	mean:	0.033	stddev:	0.245
Run-Plate:	r1P10	Cell:	J21	LogR:	-0.916291	#Sigma:	3.875	-	Expt:	3	Ctrl:	7.5	mean:	0.033	stddev:	0.245
Run-Plate:	r1P10	Cell:	J24	LogR:	-0.510826	#Sigma:	2.22	-	Expt:	18	Ctrl:	30	mean:	0.033	stddev:	0.245
Run-Plate:	r1P10	Cell:	K14	LogR:	0.5738	#Sigma:	2.207	+	Expt:	35.5	Ctrl:	20	mean:	0.033	stddev:	0.245
Run-Plate:	r1P10	Cell:	K15	LogR:	0.741937	#Sigma:	2.894	+	Expt:	10.5	Ctrl:	5	mean:	0.033	stddev:	0.245
Run-Plate:	r1P10	Cell:	L13	LogR:	1.05121	#Sigma:	4.156	+	Expt:	51.5	Ctrl:	18	mean:	0.033	stddev:	0.245
Run-Plate:	r1P10	Cell:	N1	LogR:	-0.652325	#Sigma:	2.797	-	Expt:	12.5	Ctrl:	24	mean:	0.033	stddev:	0.245
Run-Plate:	r1P10	Cell:	N14	LogR:	-0.536305	#Sigma:	2.324	-	Expt:	15.5	Ctrl:	26.5	mean:	0.033	stddev:	0.245
Run-Plate:	r1P10	Cell:	O1	LogR:	-1.49393	#Sigma:	6.232	-	Expt:	5.5	Ctrl:	24.5	mean:	0.033	stddev:	0.245
Run-Plate:	r1P10	Cell:	O20	LogR:	-0.610909	#Sigma:	2.628	-	Expt:	9.5	Ctrl:	17.5	mean:	0.033	stddev:	0.245
Run-Plate:	r1P10	Cell:	P23	LogR:	-0.502092	#Sigma:	2.184	-	Expt:	11.5	Ctrl:	19	mean:	0.033	stddev:	0.245
Run-Plate:	r1P11	Cell:	A4	LogR:	-0.8141	#Sigma:	2.882	-	Expt:	17.5	Ctrl:	39.5	mean:	-0.085	stddev:	0.253
Run-Plate:	r1P11	Cell:	B7	LogR:	-1.58563	#Sigma:	5.931	-	Expt:	8.5	Ctrl:	41.5	mean:	-0.085	stddev:	0.253
Run-Plate:	r1P11	Cell:	C4	LogR:	-0.782759	#Sigma:	2.758	-	Expt:	16	Ctrl:	35	mean:	-0.085	stddev:	0.253
Run-Plate:	r1P11	Cell:	D21	LogR:	-0.828693	#Sigma:	2.939	-	Expt:	15.5	Ctrl:	35.5	mean:	-0.085	stddev:	0.253
Run-Plate:	r1P11	Cell:	G1	LogR:	-0.634307	#Sigma:	2.171	-	Expt:	17.5	Ctrl:	33	mean:	-0.085	stddev:	0.253
Run-Plate:	r1P11	Cell:	I13	LogR:	0.564893	#Sigma:	2.569	+	Expt:	47.5	Ctrl:	27	mean:	-0.085	stddev:	0.253
Run-Plate:	r1P11	Cell:	J21	LogR:	-2.70805	#Sigma:	10.368	-	Expt:	0.5	Ctrl:	7.5	mean:	-0.085	stddev:	0.253
Run-Plate:	r1P11	Cell:	L18	LogR:	-0.672094	#Sigma:	2.321	-	Expt:	12	Ctrl:	23.5	mean:	-0.085	stddev:	0.253
Run-Plate:	r1P11	Cell:	O9	LogR:	-0.595983	#Sigma:	2.02	-	Expt:	13.5	Ctrl:	24.5	mean:	-0.085	stddev:	0.253
Run-Plate:	r1P11	Cell:	P12	LogR:	-1.46634	#Sigma:	5.46	-	Expt:	1.5	Ctrl:	6.5	mean:	-0.085	stddev:	0.253
Run-Plate:	r1P11	Cell:	P13	LogR:	-0.860201	#Sigma:	3.064	-	Expt:	11	Ctrl:	26	mean:	-0.085	stddev:	0.253
Run-Plate:	r1P12	Cell:	B10	LogR:	-0.065958	#Sigma:	2.353	+	Expt:	22	Ctrl:	23.5	mean:	-0.819	stddev:	0.32
Run-Plate:	r1P12	Cell:	C3	LogR:	-0.0674413	#Sigma:	2.349	+	Expt:	21.5	Ctrl:	23	mean:	-0.819	stddev:	0.32
Run-Plate:	r1P12	Cell:	D21	LogR:	-1.62362	#Sigma:	2.514	-	Expt:	7	Ctrl:	35.5	mean:	-0.819	stddev:	0.32
Run-Plate:	r1P12	Cell:	F1	LogR:	-1.8718	#Sigma:	3.29	-	Expt:	4	Ctrl:	26	mean:	-0.819	stddev:	0.32
Run-Plate:	r1P12	Cell:	I15	LogR:	-1.65823	#Sigma:	2.623	-	Expt:	4	Ctrl:	21	mean:	-0.819	stddev:	0.32
Run-Plate:	r1P12	Cell:	J20	LogR:	0	#Sigma:	2.559	+	Expt:	6	Ctrl:	6	mean:	-0.819	stddev:	0.32
Run-Plate:	r1P12	Cell:	J21	LogR:	-1.60944	#Sigma:	2.47	-	Expt:	1.5	Ctrl:	7.5	mean:	-0.819	stddev:	0.32
Run-Plate:	r1P12	Cell:	M1	LogR:	-1.51259	#Sigma:	2.167	-	Expt:	6.5	Ctrl:	29.5	mean:	-0.819	stddev:	0.32
Run-Plate:	r1P12	Cell:	N1	LogR:	-1.56862	#Sigma:	2.343	-	Expt:	5	Ctrl:	24	mean:	-0.819	stddev:	0.32
Run-Plate:	r1P12	Cell:	N11	LogR:	-1.5442	#Sigma:	2.266	-	Expt:	9.5	Ctrl:	44.5	mean:	-0.819	stddev:	0.32
Run-Plate:	r1P12	Cell:	N14	LogR:	-1.48539	#Sigma:	2.082	-	Expt:	6	Ctrl:	26.5	mean:	-0.819	stddev:	0.32
Run-Plate:	r1P12	Cell:	O4	LogR:	-1.97408	#Sigma:	3.61	-	Expt:	2.5	Ctrl:	18	mean:	-0.819	stddev:	0.32
Run-Plate:	r1P12	Cell:	P12	LogR:	0	#Sigma:	2.559	+	Expt:	0	Ctrl:	6.5	mean:	-0.819	stddev:	0.32
Run-Plate:	r1P12	Cell:	P13	LogR:	-3.2581	#Sigma:	7.622	-	Expt:	1	Ctrl:	26	mean:	-0.819	stddev:	0.32
Run-Plate:	r1P12	Cell:	P19	LogR:	-2.25878	#Sigma:	4.499	-	Expt:	3.5	Ctrl:	33.5	mean:	-0.819	stddev:	0.32
Run-Plate:	r1P12	Cell:	P23	LogR:	-2.02815	#Sigma:	3.779	-	Expt:	2.5	Ctrl:	19	mean:	-0.819	stddev:	0.32
Run-Plate:	r1P13	Cell:	C4	LogR:	-0.990399	#Sigma:	2.453	-	Expt:	13	Ctrl:	35	mean:	-0.22	stddev:	0.314
Run-Plate:	r1P13	Cell:	C9	LogR:	-1.30495	#Sigma:	3.455	-	Expt:	16	Ctrl:	59	mean:	-0.22	stddev:	0.314
Run-Plate:	r1P13	Cell:	D21	LogR:	-0.861482	#Sigma:	2.043	-	Expt:	15	Ctrl:	35.5	mean:	-0.22	stddev:	0.314
Run-Plate:	r1P13	Cell:	E11	LogR:	-1.46102	#Sigma:	3.952	-	Expt:	14.5	Ctrl:	62.5	mean:	-0.22	stddev:	0.314
Run-Plate:	r1P13	Cell:	F13	LogR:	-0.875469	#Sigma:	2.087	-	Expt:	32.5	Ctrl:	78	mean:	-0.22	stddev:	0.314
Run-Plate:	r1P13	Cell:	F8	LogR:	-0.962811	#Sigma:	2.366	-	Expt:	10.5	Ctrl:	27.5	mean:	-0.22	stddev:	0.314
Run-Plate:	r1P13	Cell:	H15	LogR:	-1.26224	#Sigma:	3.319	-	Expt:	7.5	Ctrl:	26.5	mean:	-0.22	stddev:	0.314
Run-Plate:	r1P13	Cell:	J15	LogR:	-1.60944	#Sigma:	4.425	-	Expt:	9	Ctrl:	45	mean:	-0.22	stddev:	0.314
Run-Plate:	r1P13	Cell:	J21	LogR:	-2.0149	#Sigma:	5.716	-	Expt:	1	Ctrl:	7.5	mean:	-0.22	stddev:	0.314
Run-Plate:	r1P13	Cell:	K10	LogR:	-2.46385	#Sigma:	7.146	-	Expt:	2	Ctrl:	23.5	mean:	-0.22	stddev:	0.314
Run-Plate:	r1P13	Cell:	L14	LogR:	-1.06087	#Sigma:	2.678	-	Expt:	9	Ctrl:	26	mean:	-0.22	stddev:	0.314
Run-Plate:	r1P13	Cell:	M12	LogR:	-0.922333	#Sigma:	2.237	-	Expt:	16.5	Ctrl:	41.5	mean:	-0.22	stddev:	0.314
Run-Plate:	r1P13	Cell:	P13	LogR:	-1.46634	#Sigma:	3.969	-	Expt:	6	Ctrl:	26	mean:	-0.22	stddev:	0.314
Run-Plate:	r1P13	Cell:	P19	LogR:	-1.0692	#Sigma:	2.704	-	Expt:	11.5	Ctrl:	33.5	mean:	-0.22	stddev:	0.314
Run-Plate:	r1P13	Cell:	P23	LogR:	-0.864997	#Sigma:	2.054	-	Expt:	8	Ctrl:	19	mean:	-0.22	stddev:	0.314
Run-Plate:	r1P14	Cell:	A21	LogR:	-0.739667	#Sigma:	2.626	-	Expt:	21	Ctrl:	44	mean:	-0.091	stddev:	0.247
Run-Plate:	r1P14	Cell:	A4	LogR:	-1.07361	#Sigma:	3.978	-	Expt:	13.5	Ctrl:	39.5	mean:	-0.091	stddev:	0.247
Run-Plate:	r1P14	Cell:	B7	LogR:	-1.01764	#Sigma:	3.752	-	Expt:	15	Ctrl:	41.5	mean:	-0.091	stddev:	0.247
Run-Plate:	r1P14	Cell:	C12	LogR:	-0.870481	#Sigma:	3.156	-	Expt:	33.5	Ctrl:	80	mean:	-0.091	stddev:	0.247
Run-Plate:	r1P14	Cell:	C3	LogR:	0.488847	#Sigma:	2.348	+	Expt:	37.5	Ctrl:	23	mean:	-0.091	stddev:	0.247
Run-Plate:	r1P14	Cell:	J20	LogR:	-0.875469	#Sigma:	3.176	-	Expt:	2.5	Ctrl:	6	mean:	-0.091	stddev:	0.247
Run-Plate:	r1P14	Cell:	J21	LogR:	-2.0149	#Sigma:	7.789	-	Expt:	1	Ctrl:	7.5	mean:	-0.091	stddev:	0.247
Run-Plate:	r1P14	Cell:	K21	LogR:	0.559616	#Sigma:	2.634	+	Expt:	24.5	Ctrl:	14	mean:	-0.091	stddev:	0.247
Run-Plate:	r1P14	Cell:	P12	LogR:	-2.56495	#Sigma:	10.016	-	Expt:	0.5	Ctrl:	6.5	mean:	-0.091	stddev:	0.247
Run-Plate:	r1P14	Cell:	P23	LogR:	-0.747214	#Sigma:	2.657	-	Expt:	9	Ctrl:	19	mean:	-0.091	stddev:	0.247
Run-Plate:	r1P15	Cell:	A4	LogR:	-0.8141	#Sigma:	4.756	-	Expt:	17.5	Ctrl:	39.5	mean:	0.18	stddev:	0.209
Run-Plate:	r1P15	Cell:	B7	LogR:	-0.65764	#Sigma:	4.008	-	Expt:	21.5	Ctrl:	41.5	mean:	0.18	stddev:	0.209
Run-Plate:	r1P15	Cell:	C12	LogR:	-0.271153	#Sigma:	2.159	-	Expt:	61	Ctrl:	80	mean:	0.18	stddev:	0.209
Run-Plate:	r1P15	Cell:	C19	LogR:	-0.367725	#Sigma:	2.621	-	Expt:	18	Ctrl:	26	mean:	0.18	stddev:	0.209
Run-Plate:	r1P15	Cell:	C4	LogR:	-0.31667	#Sigma:	2.376	-	Expt:	25.5	Ctrl:	35	mean:	0.18	stddev:	0.209
Run-Plate:	r1P15	Cell:	D21	LogR:	-0.52501	#Sigma:	3.373	-	Expt:	21	Ctrl:	35.5	mean:	0.18	stddev:	0.209
Run-Plate:	r1P15	Cell:	E4	LogR:	-0.346276	#Sigma:	2.518	-	Expt:	14.5	Ctrl:	20.5	mean:	0.18	stddev:	0.209
Run-Plate:	r1P15	Cell:	E5	LogR:	-0.323787	#Sigma:	2.41	-	Expt:	34	Ctrl:	47	mean:	0.18	stddev:	0.209
Run-Plate:	r1P15	Cell:	G1	LogR:	-0.428455	#Sigma:	2.911	-	Expt:	21.5	Ctrl:	33	mean:	0.18	stddev:	0.209
Run-Plate:	r1P15	Cell:	I20	LogR:	0.629968	#Sigma:	2.153	+	Expt:	46	Ctrl:	24.5	mean:	0.18	stddev:	0.209
Run-Plate:	r1P15	Cell:	I23	LogR:	-0.300105	#Sigma:	2.297	-	Expt:	20	Ctrl:	27	mean:	0.18	stddev:	0.209
Run-Plate:	r1P15	Cell:	J21	LogR:	-0.510826	#Sigma:	3.305	-	Expt:	4.5	Ctrl:	7.5	mean:	0.18	stddev:	0.209
Run-Plate:	r1P15	Cell:	L18	LogR:	-0.517943	#Sigma:	3.339	-	Expt:	14	Ctrl:	23.5	mean:	0.18	stddev:	0.209
Run-Plate:	r1P15	Cell:	P12	LogR:	-1.46634	#Sigma:	7.877	-	Expt:	1.5	Ctrl:	6.5	mean:	0.18	stddev:	0.209
Run-Plate:	r1P15	Cell:	P13	LogR:	-0.619039	#Sigma:	3.823	-	Expt:	14	Ctrl:	26	mean:	0.18	stddev:	0.209
Run-Plate:	r2P1	Cell:	C4	LogR:	0	#Sigma:	2.87	+	Expt:	0	Ctrl:	12.5	mean:	-1.765	stddev:	0.615
Run-Plate:	r2P1	Cell:	H15	LogR:	0	#Sigma:	2.87	+	Expt:	0	Ctrl:	34.5	mean:	-1.765	stddev:	0.615
Run-Plate:	r2P1	Cell:	I10	LogR:	-3.23868	#Sigma:	2.396	-	Expt:	2	Ctrl:	51	mean:	-1.765	stddev:	0.615
Run-Plate:	r2P1	Cell:	I15	LogR:	-3.38439	#Sigma:	2.633	-	Expt:	1	Ctrl:	29.5	mean:	-1.765	stddev:	0.615
Run-Plate:	r2P1	Cell:	J20	LogR:	0	#Sigma:	2.87	+	Expt:	0	Ctrl:	3	mean:	-1.765	stddev:	0.615
Run-Plate:	r2P1	Cell:	K21	LogR:	-3.66356	#Sigma:	3.087	-	Expt:	1	Ctrl:	39	mean:	-1.765	stddev:	0.615
Run-Plate:	r2P1	Cell:	L20	LogR:	0	#Sigma:	2.87	+	Expt:	0	Ctrl:	3.5	mean:	-1.765	stddev:	0.615
Run-Plate:	r2P1	Cell:	M19	LogR:	-3.54096	#Sigma:	2.888	-	Expt:	1	Ctrl:	34.5	mean:	-1.765	stddev:	0.615
Run-Plate:	r2P1	Cell:	M21	LogR:	-3.03255	#Sigma:	2.061	-	Expt:	2	Ctrl:	41.5	mean:	-1.765	stddev:	0.615
Run-Plate:	r2P1	Cell:	N14	LogR:	0	#Sigma:	2.87	+	Expt:	0	Ctrl:	37.5	mean:	-1.765	stddev:	0.615
Run-Plate:	r2P1	Cell:	N21	LogR:	-3.00815	#Sigma:	2.021	-	Expt:	2	Ctrl:	40.5	mean:	-1.765	stddev:	0.615
Run-Plate:	r2P1	Cell:	O12	LogR:	0	#Sigma:	2.87	+	Expt:	0	Ctrl:	50	mean:	-1.765	stddev:	0.615
Run-Plate:	r2P1	Cell:	O14	LogR:	0	#Sigma:	2.87	+	Expt:	0	Ctrl:	43	mean:	-1.765	stddev:	0.615
Run-Plate:	r2P1	Cell:	O15	LogR:	-3.62434	#Sigma:	3.023	-	Expt:	1	Ctrl:	37.5	mean:	-1.765	stddev:	0.615
Run-Plate:	r2P1	Cell:	O20	LogR:	-3.04452	#Sigma:	2.081	-	Expt:	2	Ctrl:	42	mean:	-1.765	stddev:	0.615
Run-Plate:	r2P1	Cell:	O24	LogR:	-3.67207	#Sigma:	3.101	-	Expt:	1.5	Ctrl:	59	mean:	-1.765	stddev:	0.615
Run-Plate:	r2P1	Cell:	O4	LogR:	-4.20469	#Sigma:	3.967	-	Expt:	0.5	Ctrl:	33.5	mean:	-1.765	stddev:	0.615
Run-Plate:	r2P1	Cell:	O5	LogR:	-4.17439	#Sigma:	3.918	-	Expt:	0.5	Ctrl:	32.5	mean:	-1.765	stddev:	0.615
Run-Plate:	r2P1	Cell:	O7	LogR:	-3.18842	#Sigma:	2.314	-	Expt:	2	Ctrl:	48.5	mean:	-1.765	stddev:	0.615
Run-Plate:	r2P1	Cell:	P13	LogR:	0	#Sigma:	2.87	+	Expt:	0	Ctrl:	14	mean:	-1.765	stddev:	0.615
Run-Plate:	r2P1	Cell:	P19	LogR:	0	#Sigma:	2.87	+	Expt:	0	Ctrl:	34.5	mean:	-1.765	stddev:	0.615
Run-Plate:	r2P1	Cell:	P23	LogR:	0	#Sigma:	2.87	+	Expt:	0	Ctrl:	37	mean:	-1.765	stddev:	0.615
Run-Plate:	r2P1	Cell:	P8	LogR:	-3.10906	#Sigma:	2.185	-	Expt:	2.5	Ctrl:	56	mean:	-1.765	stddev:	0.615
Run-Plate:	r2P1	Cell:	P9	LogR:	0	#Sigma:	2.87	+	Expt:	0	Ctrl:	22	mean:	-1.765	stddev:	0.615
Run-Plate:	r1P17	Cell:	A4	LogR:	-1.37372	#Sigma:	3.734	-	Expt:	10	Ctrl:	39.5	mean:	-0.429	stddev:	0.253
Run-Plate:	r1P17	Cell:	D21	LogR:	-1.08463	#Sigma:	2.591	-	Expt:	12	Ctrl:	35.5	mean:	-0.429	stddev:	0.253
Run-Plate:	r1P17	Cell:	E4	LogR:	-3.02042	#Sigma:	10.243	-	Expt:	1	Ctrl:	20.5	mean:	-0.429	stddev:	0.253
Run-Plate:	r1P17	Cell:	F10	LogR:	0.19671	#Sigma:	2.473	+	Expt:	14	Ctrl:	11.5	mean:	-0.429	stddev:	0.253
Run-Plate:	r1P17	Cell:	H13	LogR:	0.0833816	#Sigma:	2.025	+	Expt:	25	Ctrl:	23	mean:	-0.429	stddev:	0.253
Run-Plate:	r1P17	Cell:	I13	LogR:	0.169899	#Sigma:	2.367	+	Expt:	32	Ctrl:	27	mean:	-0.429	stddev:	0.253
Run-Plate:	r1P17	Cell:	J21	LogR:	1.00552	#Sigma:	5.67	+	Expt:	20.5	Ctrl:	7.5	mean:	-0.429	stddev:	0.253
Run-Plate:	r1P17	Cell:	P12	LogR:	1.32687	#Sigma:	6.94	+	Expt:	24.5	Ctrl:	6.5	mean:	-0.429	stddev:	0.253
Run-Plate:	r1P17	Cell:	P13	LogR:	-1.06087	#Sigma:	2.498	-	Expt:	9	Ctrl:	26	mean:	-0.429	stddev:	0.253
Run-Plate:	r1P19	Cell:	B10	LogR:	0.627189	#Sigma:	2.907	+	Expt:	44	Ctrl:	23.5	mean:	0.133	stddev:	0.17
Run-Plate:	r1P19	Cell:	B24	LogR:	-1.09861	#Sigma:	7.245	-	Expt:	13.5	Ctrl:	40.5	mean:	0.133	stddev:	0.17
Run-Plate:	r1P19	Cell:	C15	LogR:	-0.334202	#Sigma:	2.748	-	Expt:	31.5	Ctrl:	44	mean:	0.133	stddev:	0.17
Run-Plate:	r1P19	Cell:	C19	LogR:	0.526093	#Sigma:	2.312	+	Expt:	44	Ctrl:	26	mean:	0.133	stddev:	0.17
Run-Plate:	r1P19	Cell:	C23	LogR:	0.839751	#Sigma:	4.157	+	Expt:	44	Ctrl:	19	mean:	0.133	stddev:	0.17
Run-Plate:	r1P19	Cell:	C3	LogR:	0.625706	#Sigma:	2.898	+	Expt:	43	Ctrl:	23	mean:	0.133	stddev:	0.17
Run-Plate:	r1P19	Cell:	E11	LogR:	-0.350977	#Sigma:	2.847	-	Expt:	44	Ctrl:	62.5	mean:	0.133	stddev:	0.17
Run-Plate:	r1P19	Cell:	E15	LogR:	0.597837	#Sigma:	2.734	+	Expt:	40	Ctrl:	22	mean:	0.133	stddev:	0.17
Run-Plate:	r1P19	Cell:	E21	LogR:	0.582605	#Sigma:	2.645	+	Expt:	38.5	Ctrl:	21.5	mean:	0.133	stddev:	0.17
Run-Plate:	r1P19	Cell:	E5	LogR:	-0.40016	#Sigma:	3.136	-	Expt:	31.5	Ctrl:	47	mean:	0.133	stddev:	0.17
Run-Plate:	r1P19	Cell:	F10	LogR:	0.648695	#Sigma:	3.034	+	Expt:	22	Ctrl:	11.5	mean:	0.133	stddev:	0.17
Run-Plate:	r1P19	Cell:	H13	LogR:	0.488847	#Sigma:	2.093	+	Expt:	37.5	Ctrl:	23	mean:	0.133	stddev:	0.17
Run-Plate:	r1P19	Cell:	L3	LogR:	0.640037	#Sigma:	2.983	+	Expt:	27.5	Ctrl:	14.5	mean:	0.133	stddev:	0.17
Run-Plate:	r1P19	Cell:	N14	LogR:	-0.504556	#Sigma:	3.75	-	Expt:	16	Ctrl:	26.5	mean:	0.133	stddev:	0.17
Run-Plate:	r1P19	Cell:	O13	LogR:	-0.223144	#Sigma:	2.095	-	Expt:	24	Ctrl:	30	mean:	0.133	stddev:	0.17
Run-Plate:	r1P19	Cell:	O14	LogR:	0.638087	#Sigma:	2.971	+	Expt:	26.5	Ctrl:	14	mean:	0.133	stddev:	0.17
Run-Plate:	r1P20	Cell:	A3	LogR:	-0.839751	#Sigma:	5.144	-	Expt:	19	Ctrl:	44	mean:	0.292	stddev:	0.22
Run-Plate:	r1P20	Cell:	A4	LogR:	-0.275103	#Sigma:	2.578	-	Expt:	30	Ctrl:	39.5	mean:	0.292	stddev:	0.22
Run-Plate:	r1P20	Cell:	C15	LogR:	-0.24323	#Sigma:	2.433	-	Expt:	34.5	Ctrl:	44	mean:	0.292	stddev:	0.22
Run-Plate:	r1P20	Cell:	C3	LogR:	0.844187	#Sigma:	2.51	+	Expt:	53.5	Ctrl:	23	mean:	0.292	stddev:	0.22
Run-Plate:	r1P20	Cell:	D21	LogR:	-0.330854	#Sigma:	2.831	-	Expt:	25.5	Ctrl:	35.5	mean:	0.292	stddev:	0.22
Run-Plate:	r1P20	Cell:	F13	LogR:	-0.159507	#Sigma:	2.052	-	Expt:	66.5	Ctrl:	78	mean:	0.292	stddev:	0.22
Run-Plate:	r1P20	Cell:	K15	LogR:	0.788457	#Sigma:	2.257	+	Expt:	11	Ctrl:	5	mean:	0.292	stddev:	0.22
Run-Plate:	r1P20	Cell:	K21	LogR:	0.842183	#Sigma:	2.501	+	Expt:	32.5	Ctrl:	14	mean:	0.292	stddev:	0.22
Run-Plate:	r1P20	Cell:	L13	LogR:	0.93827	#Sigma:	2.938	+	Expt:	46	Ctrl:	18	mean:	0.292	stddev:	0.22
Run-Plate:	r1P20	Cell:	L3	LogR:	0.923164	#Sigma:	2.869	+	Expt:	36.5	Ctrl:	14.5	mean:	0.292	stddev:	0.22
Run-Plate:	r1P20	Cell:	M24	LogR:	-0.284629	#Sigma:	2.621	-	Expt:	41	Ctrl:	54.5	mean:	0.292	stddev:	0.22
Run-Plate:	r1P20	Cell:	N11	LogR:	-0.157903	#Sigma:	2.045	-	Expt:	38	Ctrl:	44.5	mean:	0.292	stddev:	0.22
Run-Plate:	r1P20	Cell:	N14	LogR:	-0.712195	#Sigma:	4.565	-	Expt:	13	Ctrl:	26.5	mean:	0.292	stddev:	0.22
Run-Plate:	r1P20	Cell:	O13	LogR:	-0.223144	#Sigma:	2.342	-	Expt:	24	Ctrl:	30	mean:	0.292	stddev:	0.22
Run-Plate:	r1P20	Cell:	P12	LogR:	-0.955511	#Sigma:	5.671	-	Expt:	2.5	Ctrl:	6.5	mean:	0.292	stddev:	0.22
Run-Plate:	r1P21	Cell:	A1	LogR:	-1.19392	#Sigma:	2.017	-	Expt:	15	Ctrl:	49.5	mean:	-0.599	stddev:	0.295
Run-Plate:	r1P21	Cell:	A4	LogR:	-1.59686	#Sigma:	3.383	-	Expt:	8	Ctrl:	39.5	mean:	-0.599	stddev:	0.295
Run-Plate:	r1P21	Cell:	B10	LogR:	0.0210534	#Sigma:	2.102	+	Expt:	24	Ctrl:	23.5	mean:	-0.599	stddev:	0.295
Run-Plate:	r1P21	Cell:	B7	LogR:	-1.85389	#Sigma:	4.254	-	Expt:	6.5	Ctrl:	41.5	mean:	-0.599	stddev:	0.295
Run-Plate:	r1P21	Cell:	E4	LogR:	-3.02042	#Sigma:	8.208	-	Expt:	1	Ctrl:	20.5	mean:	-0.599	stddev:	0.295
Run-Plate:	r1P21	Cell:	F10	LogR:	0.231802	#Sigma:	2.816	+	Expt:	14.5	Ctrl:	11.5	mean:	-0.599	stddev:	0.295
Run-Plate:	r1P21	Cell:	J20	LogR:	0.154151	#Sigma:	2.553	+	Expt:	7	Ctrl:	6	mean:	-0.599	stddev:	0.295
Run-Plate:	r1P21	Cell:	K15	LogR:	-1.20397	#Sigma:	2.051	-	Expt:	1.5	Ctrl:	5	mean:	-0.599	stddev:	0.295
Run-Plate:	r1P21	Cell:	L13	LogR:	0.245122	#Sigma:	2.861	+	Expt:	23	Ctrl:	18	mean:	-0.599	stddev:	0.295
Run-Plate:	r1P21	Cell:	O13	LogR:	-1.79176	#Sigma:	4.043	-	Expt:	5	Ctrl:	30	mean:	-0.599	stddev:	0.295
Run-Plate:	r1P21	Cell:	O23	LogR:	-1.38629	#Sigma:	2.669	-	Expt:	3.5	Ctrl:	14	mean:	-0.599	stddev:	0.295
Run-Plate:	r1P21	Cell:	P12	LogR:	0	#Sigma:	2.031	+	Expt:	0	Ctrl:	6.5	mean:	-0.599	stddev:	0.295
Run-Plate:	r1P21	Cell:	P13	LogR:	-1.31219	#Sigma:	2.418	-	Expt:	7	Ctrl:	26	mean:	-0.599	stddev:	0.295
Run-Plate:	r1P21	Cell:	P23	LogR:	-1.335	#Sigma:	2.495	-	Expt:	5	Ctrl:	19	mean:	-0.599	stddev:	0.295
Run-Plate:	r1P21	Cell:	P5	LogR:	-1.69773	#Sigma:	3.725	-	Expt:	6.5	Ctrl:	35.5	mean:	-0.599	stddev:	0.295
Run-Plate:	r1P22	Cell:	A4	LogR:	-0.498247	#Sigma:	2.735	-	Expt:	24	Ctrl:	39.5	mean:	0.035	stddev:	0.195
Run-Plate:	r1P22	Cell:	B7	LogR:	-1.16074	#Sigma:	6.132	-	Expt:	13	Ctrl:	41.5	mean:	0.035	stddev:	0.195
Run-Plate:	r1P22	Cell:	C3	LogR:	0.461818	#Sigma:	2.189	+	Expt:	36.5	Ctrl:	23	mean:	0.035	stddev:	0.195
Run-Plate:	r1P22	Cell:	E21	LogR:	0.487295	#Sigma:	2.319	+	Expt:	35	Ctrl:	21.5	mean:	0.035	stddev:	0.195
Run-Plate:	r1P22	Cell:	E4	LogR:	-1.76766	#Sigma:	9.244	-	Expt:	3.5	Ctrl:	20.5	mean:	0.035	stddev:	0.195
Run-Plate:	r1P22	Cell:	E5	LogR:	-0.854415	#Sigma:	4.561	-	Expt:	20	Ctrl:	47	mean:	0.035	stddev:	0.195
Run-Plate:	r1P22	Cell:	F10	LogR:	0.502092	#Sigma:	2.395	+	Expt:	19	Ctrl:	11.5	mean:	0.035	stddev:	0.195
Run-Plate:	r1P22	Cell:	F9	LogR:	0.523248	#Sigma:	2.504	+	Expt:	13.5	Ctrl:	8	mean:	0.035	stddev:	0.195
Run-Plate:	r1P22	Cell:	H13	LogR:	0.502092	#Sigma:	2.395	+	Expt:	38	Ctrl:	23	mean:	0.035	stddev:	0.195
Run-Plate:	r1P22	Cell:	J21	LogR:	-0.628609	#Sigma:	3.403	-	Expt:	4	Ctrl:	7.5	mean:	0.035	stddev:	0.195
Run-Plate:	r1P22	Cell:	K21	LogR:	0.517943	#Sigma:	2.477	+	Expt:	23.5	Ctrl:	14	mean:	0.035	stddev:	0.195
Run-Plate:	r1P22	Cell:	L13	LogR:	0.635989	#Sigma:	3.082	+	Expt:	34	Ctrl:	18	mean:	0.035	stddev:	0.195
Run-Plate:	r1P22	Cell:	L3	LogR:	0.503905	#Sigma:	2.405	+	Expt:	24	Ctrl:	14.5	mean:	0.035	stddev:	0.195
Run-Plate:	r1P22	Cell:	O14	LogR:	0.619039	#Sigma:	2.995	+	Expt:	26	Ctrl:	14	mean:	0.035	stddev:	0.195
Run-Plate:	r1P22	Cell:	O20	LogR:	0.470004	#Sigma:	2.231	+	Expt:	28	Ctrl:	17.5	mean:	0.035	stddev:	0.195
Run-Plate:	r1P23	Cell:	A24	LogR:	-1.09083	#Sigma:	4.675	-	Expt:	21.5	Ctrl:	64	mean:	0.293	stddev:	0.296
Run-Plate:	r1P23	Cell:	C24	LogR:	-1.59886	#Sigma:	6.391	-	Expt:	9.5	Ctrl:	47	mean:	0.293	stddev:	0.296
Run-Plate:	r1P23	Cell:	E24	LogR:	-0.431576	#Sigma:	2.448	-	Expt:	31.5	Ctrl:	48.5	mean:	0.293	stddev:	0.296
Run-Plate:	r1P23	Cell:	H22	LogR:	-1.41707	#Sigma:	5.777	-	Expt:	8	Ctrl:	33	mean:	0.293	stddev:	0.296
Run-Plate:	r1P23	Cell:	H24	LogR:	-0.361013	#Sigma:	2.21	-	Expt:	23	Ctrl:	33	mean:	0.293	stddev:	0.296
Run-Plate:	r1P23	Cell:	I16	LogR:	-0.538997	#Sigma:	2.811	-	Expt:	17.5	Ctrl:	30	mean:	0.293	stddev:	0.296
Run-Plate:	r1P23	Cell:	J20	LogR:	-1.09861	#Sigma:	4.701	-	Expt:	2	Ctrl:	6	mean:	0.293	stddev:	0.296
Run-Plate:	r1P23	Cell:	N14	LogR:	-0.569095	#Sigma:	2.912	-	Expt:	15	Ctrl:	26.5	mean:	0.293	stddev:	0.296
Run-Plate:	r1P23	Cell:	O14	LogR:	1.0245	#Sigma:	2.471	+	Expt:	39	Ctrl:	14	mean:	0.293	stddev:	0.296
Run-Plate:	r1P23	Cell:	P9	LogR:	-0.615186	#Sigma:	3.068	-	Expt:	10	Ctrl:	18.5	mean:	0.293	stddev:	0.296
Run-Plate:	r2P3	Cell:	A8	LogR:	0.402285	#Sigma:	3.169	+	Expt:	78.5	Ctrl:	52.5	mean:	-0.035	stddev:	0.138
Run-Plate:	r2P3	Cell:	E15	LogR:	0.373716	#Sigma:	2.962	+	Expt:	46.5	Ctrl:	32	mean:	-0.035	stddev:	0.138
Run-Plate:	r2P3	Cell:	J20	LogR:	0.287682	#Sigma:	2.338	+	Expt:	4	Ctrl:	3	mean:	-0.035	stddev:	0.138
Run-Plate:	r2P3	Cell:	L11	LogR:	-0.417735	#Sigma:	2.773	-	Expt:	13.5	Ctrl:	20.5	mean:	-0.035	stddev:	0.138
Run-Plate:	r2P3	Cell:	L20	LogR:	-1.25276	#Sigma:	8.824	-	Expt:	1	Ctrl:	3.5	mean:	-0.035	stddev:	0.138
Run-Plate:	r2P3	Cell:	L3	LogR:	0.34484	#Sigma:	2.752	+	Expt:	36	Ctrl:	25.5	mean:	-0.035	stddev:	0.138
Run-Plate:	r2P3	Cell:	M3	LogR:	0.257223	#Sigma:	2.118	+	Expt:	48.5	Ctrl:	37.5	mean:	-0.035	stddev:	0.138
Run-Plate:	r2P3	Cell:	O12	LogR:	-0.544727	#Sigma:	3.694	-	Expt:	29	Ctrl:	50	mean:	-0.035	stddev:	0.138
Run-Plate:	r2P3	Cell:	O3	LogR:	-0.328504	#Sigma:	2.127	-	Expt:	27	Ctrl:	37.5	mean:	-0.035	stddev:	0.138
Run-Plate:	r2P3	Cell:	O7	LogR:	-0.431576	#Sigma:	2.874	-	Expt:	31.5	Ctrl:	48.5	mean:	-0.035	stddev:	0.138
Run-Plate:	r2P3	Cell:	P13	LogR:	-0.934309	#Sigma:	6.517	-	Expt:	5.5	Ctrl:	14	mean:	-0.035	stddev:	0.138
Run-Plate:	r2P3	Cell:	P9	LogR:	0.374693	#Sigma:	2.969	+	Expt:	32	Ctrl:	22	mean:	-0.035	stddev:	0.138
Run-Plate:	r1P18	Cell:	C14	LogR:	-0.081678	#Sigma:	2.106	-	Expt:	23.5	Ctrl:	25.5	mean:	0.011	stddev:	0.044
Run-Plate:	r1P18	Cell:	E19	LogR:	-0.0845574	#Sigma:	2.172	-	Expt:	34	Ctrl:	37	mean:	0.011	stddev:	0.044
Run-Plate:	r1P18	Cell:	F9	LogR:	-0.133531	#Sigma:	3.285	-	Expt:	7	Ctrl:	8	mean:	0.011	stddev:	0.044
Run-Plate:	r1P18	Cell:	J20	LogR:	0.154151	#Sigma:	3.253	+	Expt:	7	Ctrl:	6	mean:	0.011	stddev:	0.044
Run-Plate:	r1P18	Cell:	K5	LogR:	0.15155	#Sigma:	3.194	+	Expt:	32	Ctrl:	27.5	mean:	0.011	stddev:	0.044
Run-Plate:	r1P18	Cell:	L11	LogR:	0.113329	#Sigma:	2.326	+	Expt:	14	Ctrl:	12.5	mean:	0.011	stddev:	0.044
Run-Plate:	r1P18	Cell:	M24	LogR:	-0.0861777	#Sigma:	2.209	-	Expt:	50	Ctrl:	54.5	mean:	0.011	stddev:	0.044
Run-Plate:	r1P18	Cell:	M3	LogR:	-0.0822381	#Sigma:	2.119	-	Expt:	35	Ctrl:	38	mean:	0.011	stddev:	0.044
Run-Plate:	r1P18	Cell:	N15	LogR:	0.107631	#Sigma:	2.196	+	Expt:	24.5	Ctrl:	22	mean:	0.011	stddev:	0.044
Run-Plate:	r1P18	Cell:	N16	LogR:	-0.0845574	#Sigma:	2.172	-	Expt:	34	Ctrl:	37	mean:	0.011	stddev:	0.044
Run-Plate:	r1P18	Cell:	N23	LogR:	0.127833	#Sigma:	2.655	+	Expt:	25	Ctrl:	22	mean:	0.011	stddev:	0.044
Run-Plate:	r1P18	Cell:	P10	LogR:	0.122103	#Sigma:	2.525	+	Expt:	43.5	Ctrl:	38.5	mean:	0.011	stddev:	0.044
Run-Plate:	r1P18	Cell:	P12	LogR:	0.268264	#Sigma:	5.847	+	Expt:	8.5	Ctrl:	6.5	mean:	0.011	stddev:	0.044

## Sheet: Outliers_YPDbased
GREY: ignored due to pinning mistake
				Log Ratio		Z score							mean LogR for each plate		stddev of the mean LogR for each plate
Run-Plate:	r1P1	Cell:	A24	LogR:	-0.923954	#Sigma:	4.224	-	Expt:	26	Ctrl:	65.5	mean:	0.757	stddev:	0.398
Run-Plate:	r1P1	Cell:	D9	LogR:	-1.75786	#Sigma:	6.319	-	Expt:	2.5	Ctrl:	14.5	mean:	0.757	stddev:	0.398
Run-Plate:	r1P1	Cell:	E21	LogR:	-4.29046	#Sigma:	12.682	-	Expt:	0.5	Ctrl:	36.5	mean:	0.757	stddev:	0.398
Run-Plate:	r1P1	Cell:	E24	LogR:	-0.205161	#Sigma:	2.417	-	Expt:	50.5	Ctrl:	62	mean:	0.757	stddev:	0.398
Run-Plate:	r1P2	Cell:	A21	LogR:	1.23214	#Sigma:	2.379	+	Expt:	108	Ctrl:	31.5	mean:	0.228	stddev:	0.422
Run-Plate:	r1P2	Cell:	I6	LogR:	-0.730888	#Sigma:	2.272	-	Expt:	13	Ctrl:	27	mean:	0.228	stddev:	0.422
Run-Plate:	r1P2	Cell:	J4	LogR:	-0.652325	#Sigma:	2.086	-	Expt:	12.5	Ctrl:	24	mean:	0.228	stddev:	0.422
Run-Plate:	r1P2	Cell:	J8	LogR:	-0.85745	#Sigma:	2.572	-	Expt:	14	Ctrl:	33	mean:	0.228	stddev:	0.422
Run-Plate:	r1P2	Cell:	K8	LogR:	-0.646627	#Sigma:	2.073	-	Expt:	16.5	Ctrl:	31.5	mean:	0.228	stddev:	0.422
Run-Plate:	r1P2	Cell:	L8	LogR:	-0.732368	#Sigma:	2.276	-	Expt:	12.5	Ctrl:	26	mean:	0.228	stddev:	0.422
Run-Plate:	r1P2	Cell:	M10	LogR:	-0.906721	#Sigma:	2.689	-	Expt:	10.5	Ctrl:	26	mean:	0.228	stddev:	0.422
Run-Plate:	r1P2	Cell:	M7	LogR:	-0.693147	#Sigma:	2.183	-	Expt:	11	Ctrl:	22	mean:	0.228	stddev:	0.422
Run-Plate:	r1P2	Cell:	M9	LogR:	-0.626456	#Sigma:	2.025	-	Expt:	15.5	Ctrl:	29	mean:	0.228	stddev:	0.422
Run-Plate:	r1P2	Cell:	N1	LogR:	1.20397	#Sigma:	2.313	+	Expt:	40	Ctrl:	12	mean:	0.228	stddev:	0.422
Run-Plate:	r1P2	Cell:	N7	LogR:	-0.648695	#Sigma:	2.077	-	Expt:	11.5	Ctrl:	22	mean:	0.228	stddev:	0.422
Run-Plate:	r1P2	Cell:	N8	LogR:	-0.713766	#Sigma:	2.232	-	Expt:	12	Ctrl:	24.5	mean:	0.228	stddev:	0.422
Run-Plate:	r1P2	Cell:	O10	LogR:	-0.693147	#Sigma:	2.183	-	Expt:	12	Ctrl:	24	mean:	0.228	stddev:	0.422
Run-Plate:	r1P2	Cell:	P19	LogR:	1.17272	#Sigma:	2.239	+	Expt:	63	Ctrl:	19.5	mean:	0.228	stddev:	0.422
Run-Plate:	r1P2	Cell:	P24	LogR:	1.07508	#Sigma:	2.007	+	Expt:	63	Ctrl:	21.5	mean:	0.228	stddev:	0.422
Run-Plate:	r1P3	Cell:	A24	LogR:	-0.685543	#Sigma:	2.092	-	Expt:	33	Ctrl:	65.5	mean:	0.279	stddev:	0.461
Run-Plate:	r1P3	Cell:	I5	LogR:	1.52184	#Sigma:	2.696	+	Expt:	71	Ctrl:	15.5	mean:	0.279	stddev:	0.461
Run-Plate:	r1P3	Cell:	J6	LogR:	-0.81575	#Sigma:	2.375	-	Expt:	11.5	Ctrl:	26	mean:	0.279	stddev:	0.461
Run-Plate:	r1P3	Cell:	K8	LogR:	-1.00764	#Sigma:	2.791	-	Expt:	11.5	Ctrl:	31.5	mean:	0.279	stddev:	0.461
Run-Plate:	r1P3	Cell:	L3	LogR:	-0.713766	#Sigma:	2.154	-	Expt:	12	Ctrl:	24.5	mean:	0.279	stddev:	0.461
Run-Plate:	r1P3	Cell:	L6	LogR:	-0.674455	#Sigma:	2.068	-	Expt:	13.5	Ctrl:	26.5	mean:	0.279	stddev:	0.461
Run-Plate:	r1P3	Cell:	L8	LogR:	-0.655407	#Sigma:	2.027	-	Expt:	13.5	Ctrl:	26	mean:	0.279	stddev:	0.461
Run-Plate:	r1P3	Cell:	M10	LogR:	-0.81575	#Sigma:	2.375	-	Expt:	11.5	Ctrl:	26	mean:	0.279	stddev:	0.461
Run-Plate:	r1P3	Cell:	M13	LogR:	-0.730888	#Sigma:	2.191	-	Expt:	13	Ctrl:	27	mean:	0.279	stddev:	0.461
Run-Plate:	r1P3	Cell:	M7	LogR:	-0.693147	#Sigma:	2.109	-	Expt:	11	Ctrl:	22	mean:	0.279	stddev:	0.461
Run-Plate:	r1P3	Cell:	M9	LogR:	-0.693147	#Sigma:	2.109	-	Expt:	14.5	Ctrl:	29	mean:	0.279	stddev:	0.461
Run-Plate:	r1P3	Cell:	N10	LogR:	-0.944462	#Sigma:	2.654	-	Expt:	10.5	Ctrl:	27	mean:	0.279	stddev:	0.461
Run-Plate:	r1P3	Cell:	N14	LogR:	-0.709676	#Sigma:	2.145	-	Expt:	15	Ctrl:	30.5	mean:	0.279	stddev:	0.461
Run-Plate:	r1P3	Cell:	N7	LogR:	-0.788457	#Sigma:	2.316	-	Expt:	10	Ctrl:	22	mean:	0.279	stddev:	0.461
Run-Plate:	r1P3	Cell:	N8	LogR:	-0.896088	#Sigma:	2.549	-	Expt:	10	Ctrl:	24.5	mean:	0.279	stddev:	0.461
Run-Plate:	r1P3	Cell:	O10	LogR:	-0.780159	#Sigma:	2.298	-	Expt:	11	Ctrl:	24	mean:	0.279	stddev:	0.461
Run-Plate:	r1P3	Cell:	O4	LogR:	-0.924949	#Sigma:	2.612	-	Expt:	11.5	Ctrl:	29	mean:	0.279	stddev:	0.461
Run-Plate:	r1P4	Cell:	A8	LogR:	-1.08261	#Sigma:	2.09	-	Expt:	10.5	Ctrl:	31	mean:	-0.324	stddev:	0.363
Run-Plate:	r1P4	Cell:	B1	LogR:	-1.06352	#Sigma:	2.037	-	Expt:	14.5	Ctrl:	42	mean:	-0.324	stddev:	0.363
Run-Plate:	r1P4	Cell:	B23	LogR:	-1.66501	#Sigma:	3.694	-	Expt:	10.5	Ctrl:	55.5	mean:	-0.324	stddev:	0.363
Run-Plate:	r1P4	Cell:	B3	LogR:	-2.76001	#Sigma:	6.711	-	Expt:	2.5	Ctrl:	39.5	mean:	-0.324	stddev:	0.363
Run-Plate:	r1P4	Cell:	D9	LogR:	0.503905	#Sigma:	2.281	+	Expt:	24	Ctrl:	14.5	mean:	-0.324	stddev:	0.363
Run-Plate:	r1P4	Cell:	F1	LogR:	-1.16017	#Sigma:	2.303	-	Expt:	10.5	Ctrl:	33.5	mean:	-0.324	stddev:	0.363
Run-Plate:	r1P4	Cell:	I21	LogR:	-3.06027	#Sigma:	7.538	-	Expt:	1.5	Ctrl:	32	mean:	-0.324	stddev:	0.363
Run-Plate:	r1P4	Cell:	J21	LogR:	-1.8589	#Sigma:	4.228	-	Expt:	6	Ctrl:	38.5	mean:	-0.324	stddev:	0.363
Run-Plate:	r1P4	Cell:	J22	LogR:	-1.52606	#Sigma:	3.311	-	Expt:	5	Ctrl:	23	mean:	-0.324	stddev:	0.363
Run-Plate:	r1P4	Cell:	J24	LogR:	-1.16315	#Sigma:	2.312	-	Expt:	5	Ctrl:	16	mean:	-0.324	stddev:	0.363
Run-Plate:	r1P4	Cell:	K1	LogR:	-1.32687	#Sigma:	2.763	-	Expt:	6.5	Ctrl:	24.5	mean:	-0.324	stddev:	0.363
Run-Plate:	r1P4	Cell:	K24	LogR:	-1.13943	#Sigma:	2.246	-	Expt:	12	Ctrl:	37.5	mean:	-0.324	stddev:	0.363
Run-Plate:	r1P4	Cell:	N1	LogR:	-1.56862	#Sigma:	3.429	-	Expt:	2.5	Ctrl:	12	mean:	-0.324	stddev:	0.363
Run-Plate:	r1P4	Cell:	N13	LogR:	-1.94591	#Sigma:	4.468	-	Expt:	2	Ctrl:	14	mean:	-0.324	stddev:	0.363
Run-Plate:	r1P4	Cell:	N2	LogR:	-1.76359	#Sigma:	3.966	-	Expt:	3	Ctrl:	17.5	mean:	-0.324	stddev:	0.363
Run-Plate:	r1P4	Cell:	N5	LogR:	-1.19214	#Sigma:	2.392	-	Expt:	8.5	Ctrl:	28	mean:	-0.324	stddev:	0.363
Run-Plate:	r1P4	Cell:	O1	LogR:	-1.13943	#Sigma:	2.246	-	Expt:	8	Ctrl:	25	mean:	-0.324	stddev:	0.363
Run-Plate:	r1P4	Cell:	O4	LogR:	-1.17007	#Sigma:	2.331	-	Expt:	9	Ctrl:	29	mean:	-0.324	stddev:	0.363
Run-Plate:	r1P5	Cell:	A1	LogR:	0	#Sigma:	2.546	+	Expt:	0	Ctrl:	64.5	mean:	-0.858	stddev:	0.337
Run-Plate:	r1P5	Cell:	A2	LogR:	0	#Sigma:	2.546	+	Expt:	0	Ctrl:	45	mean:	-0.858	stddev:	0.337
Run-Plate:	r1P5	Cell:	A24	LogR:	-1.97155	#Sigma:	3.304	-	Expt:	11	Ctrl:	79	mean:	-0.858	stddev:	0.337
Run-Plate:	r1P5	Cell:	A3	LogR:	0	#Sigma:	2.546	+	Expt:	0	Ctrl:	47	mean:	-0.858	stddev:	0.337
Run-Plate:	r1P5	Cell:	B1	LogR:	0	#Sigma:	2.546	+	Expt:	0	Ctrl:	53.5	mean:	-0.858	stddev:	0.337
Run-Plate:	r1P5	Cell:	B2	LogR:	0	#Sigma:	2.546	+	Expt:	0	Ctrl:	38.5	mean:	-0.858	stddev:	0.337
Run-Plate:	r1P5	Cell:	C24	LogR:	0	#Sigma:	2.546	+	Expt:	0	Ctrl:	54	mean:	-0.858	stddev:	0.337
Run-Plate:	r1P5	Cell:	C4	LogR:	-0.13062	#Sigma:	2.158	+	Expt:	21.5	Ctrl:	24.5	mean:	-0.858	stddev:	0.337
Run-Plate:	r1P5	Cell:	D9	LogR:	0.0909718	#Sigma:	2.816	+	Expt:	23	Ctrl:	21	mean:	-0.858	stddev:	0.337
Run-Plate:	r1P5	Cell:	E24	LogR:	0	#Sigma:	2.546	+	Expt:	0	Ctrl:	77.5	mean:	-0.858	stddev:	0.337
Run-Plate:	r1P5	Cell:	K21	LogR:	-1.62597	#Sigma:	2.279	-	Expt:	6	Ctrl:	30.5	mean:	-0.858	stddev:	0.337
Run-Plate:	r1P5	Cell:	L13	LogR:	-2.73003	#Sigma:	5.555	-	Expt:	3	Ctrl:	46	mean:	-0.858	stddev:	0.337
Run-Plate:	r1P5	Cell:	L22	LogR:	0	#Sigma:	2.546	+	Expt:	0	Ctrl:	2	mean:	-0.858	stddev:	0.337
Run-Plate:	r1P5	Cell:	M1	LogR:	-1.57122	#Sigma:	2.116	-	Expt:	8	Ctrl:	38.5	mean:	-0.858	stddev:	0.337
Run-Plate:	r1P5	Cell:	N1	LogR:	-1.80829	#Sigma:	2.82	-	Expt:	5	Ctrl:	30.5	mean:	-0.858	stddev:	0.337
Run-Plate:	r1P5	Cell:	N13	LogR:	-1.62924	#Sigma:	2.289	-	Expt:	5	Ctrl:	25.5	mean:	-0.858	stddev:	0.337
Run-Plate:	r1P5	Cell:	N2	LogR:	-1.96009	#Sigma:	3.27	-	Expt:	5	Ctrl:	35.5	mean:	-0.858	stddev:	0.337
Run-Plate:	r1P5	Cell:	O1	LogR:	-1.69939	#Sigma:	2.497	-	Expt:	8.5	Ctrl:	46.5	mean:	-0.858	stddev:	0.337
Run-Plate:	r1P5	Cell:	P9	LogR:	-2.89037	#Sigma:	6.031	-	Expt:	0.5	Ctrl:	9	mean:	-0.858	stddev:	0.337
Run-Plate:	r1P6	Cell:	A24	LogR:	-0.29023	#Sigma:	3.275	-	Expt:	49	Ctrl:	65.5	mean:	0.702	stddev:	0.303
Run-Plate:	r1P6	Cell:	C24	LogR:	-1.54045	#Sigma:	7.401	-	Expt:	9	Ctrl:	42	mean:	0.702	stddev:	0.303
Run-Plate:	r1P6	Cell:	E24	LogR:	0	#Sigma:	2.317	-	Expt:	0	Ctrl:	62	mean:	0.702	stddev:	0.303
Run-Plate:	r1P6	Cell:	N21	LogR:	0.0210534	#Sigma:	2.247	-	Expt:	24	Ctrl:	23.5	mean:	0.702	stddev:	0.303
Run-Plate:	r1P6	Cell:	N22	LogR:	0	#Sigma:	2.317	-	Expt:	23.5	Ctrl:	23.5	mean:	0.702	stddev:	0.303
Run-Plate:	r1P6	Cell:	N7	LogR:	0.065958	#Sigma:	2.099	-	Expt:	23.5	Ctrl:	22	mean:	0.702	stddev:	0.303
Run-Plate:	r1P6	Cell:	N8	LogR:	-0.0851578	#Sigma:	2.598	-	Expt:	22.5	Ctrl:	24.5	mean:	0.702	stddev:	0.303
Run-Plate:	r1P6	Cell:	O21	LogR:	0.0400053	#Sigma:	2.185	-	Expt:	25.5	Ctrl:	24.5	mean:	0.702	stddev:	0.303
Run-Plate:	r1P6	Cell:	P13	LogR:	-0.205852	#Sigma:	2.996	-	Expt:	17.5	Ctrl:	21.5	mean:	0.702	stddev:	0.303
Run-Plate:	r1P7	Cell:	A24	LogR:	-1.40946	#Sigma:	2.18	-	Expt:	16	Ctrl:	65.5	mean:	-0.193	stddev:	0.558
Run-Plate:	r1P7	Cell:	C24	LogR:	-4.43082	#Sigma:	7.595	-	Expt:	0.5	Ctrl:	42	mean:	-0.193	stddev:	0.558
Run-Plate:	r1P7	Cell:	E24	LogR:	-2.33537	#Sigma:	3.839	-	Expt:	6	Ctrl:	62	mean:	-0.193	stddev:	0.558
Run-Plate:	r1P7	Cell:	G23	LogR:	-1.55619	#Sigma:	2.443	-	Expt:	13.5	Ctrl:	64	mean:	-0.193	stddev:	0.558
Run-Plate:	r1P7	Cell:	H15	LogR:	-1.50408	#Sigma:	2.35	-	Expt:	5	Ctrl:	22.5	mean:	-0.193	stddev:	0.558
Run-Plate:	r1P7	Cell:	H24	LogR:	-1.4816	#Sigma:	2.309	-	Expt:	5	Ctrl:	22	mean:	-0.193	stddev:	0.558
Run-Plate:	r1P7	Cell:	I20	LogR:	-1.90954	#Sigma:	3.076	-	Expt:	4	Ctrl:	27	mean:	-0.193	stddev:	0.558
Run-Plate:	r1P7	Cell:	J20	LogR:	-2.14007	#Sigma:	3.489	-	Expt:	3	Ctrl:	25.5	mean:	-0.193	stddev:	0.558
Run-Plate:	r1P7	Cell:	K17	LogR:	-1.35812	#Sigma:	2.088	-	Expt:	4.5	Ctrl:	17.5	mean:	-0.193	stddev:	0.558
Run-Plate:	r1P7	Cell:	K20	LogR:	-1.48427	#Sigma:	2.314	-	Expt:	8.5	Ctrl:	37.5	mean:	-0.193	stddev:	0.558
Run-Plate:	r1P7	Cell:	L13	LogR:	-1.91692	#Sigma:	3.089	-	Expt:	5	Ctrl:	34	mean:	-0.193	stddev:	0.558
Run-Plate:	r1P7	Cell:	L19	LogR:	-1.70475	#Sigma:	2.709	-	Expt:	8	Ctrl:	44	mean:	-0.193	stddev:	0.558
Run-Plate:	r2P3	Cell:	A16	LogR:	0.0454624	#Sigma:	2.191	+	Expt:	45	Ctrl:	43	mean:	-0.592	stddev:	0.291
Run-Plate:	r2P3	Cell:	A21	LogR:	-1.39586	#Sigma:	2.762	-	Expt:	13	Ctrl:	52.5	mean:	-0.592	stddev:	0.291
Run-Plate:	r2P3	Cell:	B1	LogR:	0.682676	#Sigma:	4.38	+	Expt:	47.5	Ctrl:	24	mean:	-0.592	stddev:	0.291
Run-Plate:	r2P3	Cell:	C4	LogR:	0	#Sigma:	2.034	+	Expt:	0	Ctrl:	13.5	mean:	-0.592	stddev:	0.291
Run-Plate:	r2P3	Cell:	D15	LogR:	-1.41369	#Sigma:	2.824	-	Expt:	13.5	Ctrl:	55.5	mean:	-0.592	stddev:	0.291
Run-Plate:	r2P3	Cell:	D9	LogR:	-1.18958	#Sigma:	2.054	-	Expt:	7	Ctrl:	23	mean:	-0.592	stddev:	0.291
Run-Plate:	r2P3	Cell:	F10	LogR:	-1.18958	#Sigma:	2.054	-	Expt:	7	Ctrl:	23	mean:	-0.592	stddev:	0.291
Run-Plate:	r2P3	Cell:	I21	LogR:	0.0425596	#Sigma:	2.181	+	Expt:	24	Ctrl:	23	mean:	-0.592	stddev:	0.291
Run-Plate:	r2P3	Cell:	I23	LogR:	0.448025	#Sigma:	3.574	+	Expt:	18	Ctrl:	11.5	mean:	-0.592	stddev:	0.291
Run-Plate:	r2P3	Cell:	N1	LogR:	0.223144	#Sigma:	2.801	+	Expt:	20	Ctrl:	16	mean:	-0.592	stddev:	0.291
Run-Plate:	r2P3	Cell:	N13	LogR:	0.479573	#Sigma:	3.682	+	Expt:	10.5	Ctrl:	6.5	mean:	-0.592	stddev:	0.291
Run-Plate:	r2P3	Cell:	N24	LogR:	0.0344862	#Sigma:	2.153	+	Expt:	29.5	Ctrl:	28.5	mean:	-0.592	stddev:	0.291
Run-Plate:	r2P3	Cell:	O1	LogR:	0.0845574	#Sigma:	2.325	+	Expt:	18.5	Ctrl:	17	mean:	-0.592	stddev:	0.291
Run-Plate:	r2P3	Cell:	O22	LogR:	0.0194181	#Sigma:	2.101	+	Expt:	26	Ctrl:	25.5	mean:	-0.592	stddev:	0.291
Run-Plate:	r2P3	Cell:	O3	LogR:	0	#Sigma:	2.034	+	Expt:	19	Ctrl:	19	mean:	-0.592	stddev:	0.291
Run-Plate:	r2P3	Cell:	O5	LogR:	0	#Sigma:	2.034	+	Expt:	16	Ctrl:	16	mean:	-0.592	stddev:	0.291
Run-Plate:	r2P3	Cell:	O8	LogR:	0.0968498	#Sigma:	2.367	+	Expt:	32.5	Ctrl:	29.5	mean:	-0.592	stddev:	0.291
Run-Plate:	r2P3	Cell:	P13	LogR:	0	#Sigma:	2.034	+	Expt:	0	Ctrl:	5.5	mean:	-0.592	stddev:	0.291
Run-Plate:	r2P3	Cell:	P23	LogR:	-1.70475	#Sigma:	3.824	-	Expt:	3	Ctrl:	16.5	mean:	-0.592	stddev:	0.291
Run-Plate:	r1P10	Cell:	A24	LogR:	-1.98483	#Sigma:	6.594	-	Expt:	9	Ctrl:	65.5	mean:	0.376	stddev:	0.358
Run-Plate:	r1P10	Cell:	D9	LogR:	1.53054	#Sigma:	3.225	+	Expt:	67	Ctrl:	14.5	mean:	0.376	stddev:	0.358
Run-Plate:	r1P10	Cell:	E24	LogR:	-1.45299	#Sigma:	5.109	-	Expt:	14.5	Ctrl:	62	mean:	0.376	stddev:	0.358
Run-Plate:	r1P10	Cell:	L11	LogR:	-0.399156	#Sigma:	2.165	-	Expt:	26.5	Ctrl:	39.5	mean:	0.376	stddev:	0.358
Run-Plate:	r1P10	Cell:	O1	LogR:	-0.616186	#Sigma:	2.771	-	Expt:	13.5	Ctrl:	25	mean:	0.376	stddev:	0.358
Run-Plate:	r1P10	Cell:	O13	LogR:	-3.97029	#Sigma:	12.14	-	Expt:	0.5	Ctrl:	26.5	mean:	0.376	stddev:	0.358
Run-Plate:	r1P10	Cell:	P13	LogR:	-0.870828	#Sigma:	3.483	-	Expt:	9	Ctrl:	21.5	mean:	0.376	stddev:	0.358
Run-Plate:	r1P11	Cell:	A24	LogR:	-2.23614	#Sigma:	4.526	-	Expt:	7	Ctrl:	65.5	mean:	-0.557	stddev:	0.371
Run-Plate:	r1P11	Cell:	A9	LogR:	0.34484	#Sigma:	2.431	+	Expt:	36	Ctrl:	25.5	mean:	-0.557	stddev:	0.371
Run-Plate:	r1P11	Cell:	B17	LogR:	0.27838	#Sigma:	2.252	+	Expt:	53.5	Ctrl:	40.5	mean:	-0.557	stddev:	0.371
Run-Plate:	r1P11	Cell:	D9	LogR:	0.621688	#Sigma:	3.177	+	Expt:	27	Ctrl:	14.5	mean:	-0.557	stddev:	0.371
Run-Plate:	r1P11	Cell:	F10	LogR:	0.389465	#Sigma:	2.551	+	Expt:	15.5	Ctrl:	10.5	mean:	-0.557	stddev:	0.371
Run-Plate:	r1P11	Cell:	H15	LogR:	-3.80666	#Sigma:	8.759	-	Expt:	0.5	Ctrl:	22.5	mean:	-0.557	stddev:	0.371
Run-Plate:	r1P11	Cell:	H24	LogR:	-1.38629	#Sigma:	2.235	-	Expt:	5.5	Ctrl:	22	mean:	-0.557	stddev:	0.371
Run-Plate:	r1P11	Cell:	I5	LogR:	-1.35455	#Sigma:	2.15	-	Expt:	4	Ctrl:	15.5	mean:	-0.557	stddev:	0.371
Run-Plate:	r1P11	Cell:	N1	LogR:	0.189242	#Sigma:	2.011	+	Expt:	14.5	Ctrl:	12	mean:	-0.557	stddev:	0.371
Run-Plate:	r1P11	Cell:	O1	LogR:	-1.60944	#Sigma:	2.837	-	Expt:	5	Ctrl:	25	mean:	-0.557	stddev:	0.371
Run-Plate:	r1P11	Cell:	O4	LogR:	0.612386	#Sigma:	3.152	+	Expt:	53.5	Ctrl:	29	mean:	-0.557	stddev:	0.371
Run-Plate:	r1P11	Cell:	O7	LogR:	0.287682	#Sigma:	2.277	+	Expt:	26	Ctrl:	19.5	mean:	-0.557	stddev:	0.371
Run-Plate:	r1P11	Cell:	P13	LogR:	-2.15176	#Sigma:	4.299	-	Expt:	2.5	Ctrl:	21.5	mean:	-0.557	stddev:	0.371
Run-Plate:	r1P12	Cell:	C24	LogR:	-4.43082	#Sigma:	6.02	-	Expt:	0.5	Ctrl:	42	mean:	-0.951	stddev:	0.578
Run-Plate:	r1P12	Cell:	D9	LogR:	0.583948	#Sigma:	2.656	+	Expt:	26	Ctrl:	14.5	mean:	-0.951	stddev:	0.578
Run-Plate:	r1P12	Cell:	F10	LogR:	0.322773	#Sigma:	2.204	+	Expt:	14.5	Ctrl:	10.5	mean:	-0.951	stddev:	0.578
Run-Plate:	r1P12	Cell:	H24	LogR:	-2.17475	#Sigma:	2.117	-	Expt:	2.5	Ctrl:	22	mean:	-0.951	stddev:	0.578
Run-Plate:	r1P12	Cell:	J15	LogR:	-2.35138	#Sigma:	2.423	-	Expt:	3	Ctrl:	31.5	mean:	-0.951	stddev:	0.578
Run-Plate:	r1P12	Cell:	M17	LogR:	-2.14007	#Sigma:	2.057	-	Expt:	3	Ctrl:	25.5	mean:	-0.951	stddev:	0.578
Run-Plate:	r1P12	Cell:	N11	LogR:	-2.19722	#Sigma:	2.156	-	Expt:	5.5	Ctrl:	49.5	mean:	-0.951	stddev:	0.578
Run-Plate:	r1P12	Cell:	O12	LogR:	-3.10608	#Sigma:	3.729	-	Expt:	1.5	Ctrl:	33.5	mean:	-0.951	stddev:	0.578
Run-Plate:	r1P12	Cell:	O16	LogR:	-2.3979	#Sigma:	2.503	-	Expt:	2	Ctrl:	22	mean:	-0.951	stddev:	0.578
Run-Plate:	r1P12	Cell:	O19	LogR:	-2.17475	#Sigma:	2.117	-	Expt:	2.5	Ctrl:	22	mean:	-0.951	stddev:	0.578
Run-Plate:	r1P12	Cell:	O4	LogR:	0.524524	#Sigma:	2.553	+	Expt:	49	Ctrl:	29	mean:	-0.951	stddev:	0.578
Run-Plate:	r1P12	Cell:	O9	LogR:	-2.12823	#Sigma:	2.037	-	Expt:	2.5	Ctrl:	21	mean:	-0.951	stddev:	0.578
Run-Plate:	r1P12	Cell:	P10	LogR:	-2.2192	#Sigma:	2.194	-	Expt:	2.5	Ctrl:	23	mean:	-0.951	stddev:	0.578
Run-Plate:	r1P12	Cell:	P16	LogR:	-3.17805	#Sigma:	3.853	-	Expt:	1	Ctrl:	24	mean:	-0.951	stddev:	0.578
Run-Plate:	r1P12	Cell:	P19	LogR:	-3.66356	#Sigma:	4.693	-	Expt:	0.5	Ctrl:	19.5	mean:	-0.951	stddev:	0.578
Run-Plate:	r1P13	Cell:	C4	LogR:	-3.89182	#Sigma:	3.448	-	Expt:	0.5	Ctrl:	24.5	mean:	-1.678	stddev:	0.642
Run-Plate:	r1P13	Cell:	H15	LogR:	0	#Sigma:	2.614	+	Expt:	0	Ctrl:	27.5	mean:	-1.678	stddev:	0.642
Run-Plate:	r1P13	Cell:	H24	LogR:	-3.55535	#Sigma:	2.924	-	Expt:	1	Ctrl:	35	mean:	-1.678	stddev:	0.642
Run-Plate:	r1P13	Cell:	I23	LogR:	0	#Sigma:	2.614	+	Expt:	0	Ctrl:	21.5	mean:	-1.678	stddev:	0.642
Run-Plate:	r1P13	Cell:	J15	LogR:	-3.83945	#Sigma:	3.367	-	Expt:	1	Ctrl:	46.5	mean:	-1.678	stddev:	0.642
Run-Plate:	r1P13	Cell:	K15	LogR:	0	#Sigma:	2.614	+	Expt:	0	Ctrl:	4	mean:	-1.678	stddev:	0.642
Run-Plate:	r1P13	Cell:	K21	LogR:	0	#Sigma:	2.614	+	Expt:	0	Ctrl:	30.5	mean:	-1.678	stddev:	0.642
Run-Plate:	r1P13	Cell:	K23	LogR:	0	#Sigma:	2.614	+	Expt:	0	Ctrl:	38	mean:	-1.678	stddev:	0.642
Run-Plate:	r1P13	Cell:	L18	LogR:	0	#Sigma:	2.614	+	Expt:	0	Ctrl:	20.5	mean:	-1.678	stddev:	0.642
Run-Plate:	r1P13	Cell:	L22	LogR:	0	#Sigma:	2.614	+	Expt:	0	Ctrl:	2	mean:	-1.678	stddev:	0.642
Run-Plate:	r1P13	Cell:	M19	LogR:	-4.39445	#Sigma:	4.231	-	Expt:	0.5	Ctrl:	40.5	mean:	-1.678	stddev:	0.642
Run-Plate:	r1P13	Cell:	M21	LogR:	-4.20469	#Sigma:	3.936	-	Expt:	0.5	Ctrl:	33.5	mean:	-1.678	stddev:	0.642
Run-Plate:	r1P13	Cell:	M23	LogR:	-3.43399	#Sigma:	2.735	-	Expt:	1.5	Ctrl:	46.5	mean:	-1.678	stddev:	0.642
Run-Plate:	r1P13	Cell:	N20	LogR:	-4.33073	#Sigma:	4.132	-	Expt:	0.5	Ctrl:	38	mean:	-1.678	stddev:	0.642
Run-Plate:	r1P13	Cell:	N22	LogR:	0	#Sigma:	2.614	+	Expt:	0	Ctrl:	45	mean:	-1.678	stddev:	0.642
Run-Plate:	r1P13	Cell:	N23	LogR:	-3.17805	#Sigma:	2.337	-	Expt:	2	Ctrl:	48	mean:	-1.678	stddev:	0.642
Run-Plate:	r1P13	Cell:	O13	LogR:	0	#Sigma:	2.614	+	Expt:	0	Ctrl:	49.5	mean:	-1.678	stddev:	0.642
Run-Plate:	r1P13	Cell:	O19	LogR:	-2.99573	#Sigma:	2.053	-	Expt:	2	Ctrl:	40	mean:	-1.678	stddev:	0.642
Run-Plate:	r1P13	Cell:	O21	LogR:	-3.83945	#Sigma:	3.367	-	Expt:	1	Ctrl:	46.5	mean:	-1.678	stddev:	0.642
Run-Plate:	r1P13	Cell:	O22	LogR:	-4.52179	#Sigma:	4.43	-	Expt:	0.5	Ctrl:	46	mean:	-1.678	stddev:	0.642
Run-Plate:	r1P13	Cell:	O23	LogR:	-3.21888	#Sigma:	2.4	-	Expt:	2	Ctrl:	50	mean:	-1.678	stddev:	0.642
Run-Plate:	r1P13	Cell:	O24	LogR:	0	#Sigma:	2.614	+	Expt:	0	Ctrl:	43.5	mean:	-1.678	stddev:	0.642
Run-Plate:	r1P13	Cell:	P13	LogR:	0	#Sigma:	2.614	+	Expt:	0	Ctrl:	33	mean:	-1.678	stddev:	0.642
Run-Plate:	r1P13	Cell:	P19	LogR:	-3.24519	#Sigma:	2.441	-	Expt:	1.5	Ctrl:	38.5	mean:	-1.678	stddev:	0.642
Run-Plate:	r1P13	Cell:	P21	LogR:	0	#Sigma:	2.614	+	Expt:	0	Ctrl:	74	mean:	-1.678	stddev:	0.642
Run-Plate:	r1P13	Cell:	P22	LogR:	0	#Sigma:	2.614	+	Expt:	0	Ctrl:	35.5	mean:	-1.678	stddev:	0.642
Run-Plate:	r1P13	Cell:	P23	LogR:	0	#Sigma:	2.614	+	Expt:	0	Ctrl:	37	mean:	-1.678	stddev:	0.642
Run-Plate:	r1P13	Cell:	P24	LogR:	0	#Sigma:	2.614	+	Expt:	0	Ctrl:	44	mean:	-1.678	stddev:	0.642
Run-Plate:	r1P13	Cell:	P9	LogR:	0	#Sigma:	2.614	+	Expt:	0	Ctrl:	9	mean:	-1.678	stddev:	0.642
Run-Plate:	r1P14	Cell:	A9	LogR:	-0.803495	#Sigma:	2.039	+	Expt:	15	Ctrl:	33.5	mean:	-1.405	stddev:	0.295
Run-Plate:	r1P14	Cell:	C15	LogR:	-0.635989	#Sigma:	2.607	+	Expt:	22.5	Ctrl:	42.5	mean:	-1.405	stddev:	0.295
Run-Plate:	r1P14	Cell:	C4	LogR:	-2.28238	#Sigma:	2.974	-	Expt:	2.5	Ctrl:	24.5	mean:	-1.405	stddev:	0.295
Run-Plate:	r1P14	Cell:	D22	LogR:	-2.31363	#Sigma:	3.08	-	Expt:	9	Ctrl:	91	mean:	-1.405	stddev:	0.295
Run-Plate:	r1P14	Cell:	D9	LogR:	-0.405465	#Sigma:	3.388	+	Expt:	14	Ctrl:	21	mean:	-1.405	stddev:	0.295
Run-Plate:	r1P14	Cell:	E24	LogR:	-2.15305	#Sigma:	2.536	-	Expt:	9	Ctrl:	77.5	mean:	-1.405	stddev:	0.295
Run-Plate:	r1P14	Cell:	G23	LogR:	-1.9989	#Sigma:	2.013	-	Expt:	10.5	Ctrl:	77.5	mean:	-1.405	stddev:	0.295
Run-Plate:	r1P14	Cell:	H15	LogR:	0	#Sigma:	4.763	+	Expt:	0	Ctrl:	27.5	mean:	-1.405	stddev:	0.295
Run-Plate:	r1P14	Cell:	H24	LogR:	-2.16905	#Sigma:	2.59	-	Expt:	4	Ctrl:	35	mean:	-1.405	stddev:	0.295
Run-Plate:	r1P14	Cell:	I23	LogR:	-2.37491	#Sigma:	3.288	-	Expt:	2	Ctrl:	21.5	mean:	-1.405	stddev:	0.295
Run-Plate:	r1P14	Cell:	K15	LogR:	0	#Sigma:	4.763	+	Expt:	0	Ctrl:	4	mean:	-1.405	stddev:	0.295
Run-Plate:	r1P14	Cell:	K21	LogR:	-2.16496	#Sigma:	2.576	-	Expt:	3.5	Ctrl:	30.5	mean:	-1.405	stddev:	0.295
Run-Plate:	r1P14	Cell:	K23	LogR:	-2.25129	#Sigma:	2.869	-	Expt:	4	Ctrl:	38	mean:	-1.405	stddev:	0.295
Run-Plate:	r1P14	Cell:	L22	LogR:	0	#Sigma:	4.763	+	Expt:	0	Ctrl:	2	mean:	-1.405	stddev:	0.295
Run-Plate:	r1P14	Cell:	M23	LogR:	-2.04769	#Sigma:	2.179	-	Expt:	6	Ctrl:	46.5	mean:	-1.405	stddev:	0.295
Run-Plate:	r1P14	Cell:	N1	LogR:	-2.03143	#Sigma:	2.123	-	Expt:	4	Ctrl:	30.5	mean:	-1.405	stddev:	0.295
Run-Plate:	r1P14	Cell:	N13	LogR:	-0.753772	#Sigma:	2.208	+	Expt:	12	Ctrl:	25.5	mean:	-1.405	stddev:	0.295
Run-Plate:	r1P14	Cell:	N22	LogR:	-2.19722	#Sigma:	2.686	-	Expt:	5	Ctrl:	45	mean:	-1.405	stddev:	0.295
Run-Plate:	r1P14	Cell:	N23	LogR:	-2.07944	#Sigma:	2.286	-	Expt:	6	Ctrl:	48	mean:	-1.405	stddev:	0.295
Run-Plate:	r1P14	Cell:	O1	LogR:	-2.23001	#Sigma:	2.797	-	Expt:	5	Ctrl:	46.5	mean:	-1.405	stddev:	0.295
Run-Plate:	r1P14	Cell:	O13	LogR:	0	#Sigma:	4.763	+	Expt:	0	Ctrl:	49.5	mean:	-1.405	stddev:	0.295
Run-Plate:	r1P14	Cell:	O24	LogR:	-2.38647	#Sigma:	3.327	-	Expt:	4	Ctrl:	43.5	mean:	-1.405	stddev:	0.295
Run-Plate:	r1P14	Cell:	O4	LogR:	-0.537393	#Sigma:	2.941	+	Expt:	26	Ctrl:	44.5	mean:	-1.405	stddev:	0.295
Run-Plate:	r1P14	Cell:	P13	LogR:	-2.58022	#Sigma:	3.984	-	Expt:	2.5	Ctrl:	33	mean:	-1.405	stddev:	0.295
Run-Plate:	r1P15	Cell:	C15	LogR:	-0.0813456	#Sigma:	2.895	+	Expt:	29.5	Ctrl:	32	mean:	-1.555	stddev:	0.509
Run-Plate:	r1P15	Cell:	C4	LogR:	0	#Sigma:	3.055	+	Expt:	0	Ctrl:	19	mean:	-1.555	stddev:	0.509
Run-Plate:	r1P15	Cell:	C8	LogR:	-2.89037	#Sigma:	2.624	-	Expt:	1.5	Ctrl:	27	mean:	-1.555	stddev:	0.509
Run-Plate:	r1P15	Cell:	D22	LogR:	-2.8622	#Sigma:	2.568	-	Expt:	4	Ctrl:	70	mean:	-1.555	stddev:	0.509
Run-Plate:	r1P15	Cell:	D9	LogR:	-0.534082	#Sigma:	2.006	+	Expt:	8.5	Ctrl:	14.5	mean:	-1.555	stddev:	0.509
Run-Plate:	r1P15	Cell:	E22	LogR:	-0.458575	#Sigma:	2.154	+	Expt:	27.5	Ctrl:	43.5	mean:	-1.555	stddev:	0.509
Run-Plate:	r1P15	Cell:	H15	LogR:	0	#Sigma:	3.055	+	Expt:	0	Ctrl:	22.5	mean:	-1.555	stddev:	0.509
Run-Plate:	r1P15	Cell:	H24	LogR:	0	#Sigma:	3.055	+	Expt:	0	Ctrl:	22	mean:	-1.555	stddev:	0.509
Run-Plate:	r1P15	Cell:	I23	LogR:	0	#Sigma:	3.055	+	Expt:	0	Ctrl:	12	mean:	-1.555	stddev:	0.509
Run-Plate:	r1P15	Cell:	I5	LogR:	0	#Sigma:	3.055	+	Expt:	0	Ctrl:	15.5	mean:	-1.555	stddev:	0.509
Run-Plate:	r1P15	Cell:	J22	LogR:	-3.13549	#Sigma:	3.105	-	Expt:	1	Ctrl:	23	mean:	-1.555	stddev:	0.509
Run-Plate:	r1P15	Cell:	J23	LogR:	0	#Sigma:	3.055	+	Expt:	0	Ctrl:	28	mean:	-1.555	stddev:	0.509
Run-Plate:	r1P15	Cell:	J24	LogR:	-2.77259	#Sigma:	2.392	-	Expt:	1	Ctrl:	16	mean:	-1.555	stddev:	0.509
Run-Plate:	r1P15	Cell:	K21	LogR:	-2.94444	#Sigma:	2.73	-	Expt:	1	Ctrl:	19	mean:	-1.555	stddev:	0.509
Run-Plate:	r1P15	Cell:	K23	LogR:	0	#Sigma:	3.055	+	Expt:	0	Ctrl:	21.5	mean:	-1.555	stddev:	0.509
Run-Plate:	r1P15	Cell:	L18	LogR:	0	#Sigma:	3.055	+	Expt:	0	Ctrl:	11.5	mean:	-1.555	stddev:	0.509
Run-Plate:	r1P15	Cell:	N22	LogR:	-2.75154	#Sigma:	2.351	-	Expt:	1.5	Ctrl:	23.5	mean:	-1.555	stddev:	0.509
Run-Plate:	r1P15	Cell:	O1	LogR:	-3.21888	#Sigma:	3.269	-	Expt:	1	Ctrl:	25	mean:	-1.555	stddev:	0.509
Run-Plate:	r1P15	Cell:	O12	LogR:	-3.51155	#Sigma:	3.844	-	Expt:	1	Ctrl:	33.5	mean:	-1.555	stddev:	0.509
Run-Plate:	r1P15	Cell:	O13	LogR:	0	#Sigma:	3.055	+	Expt:	0	Ctrl:	26.5	mean:	-1.555	stddev:	0.509
Run-Plate:	r1P15	Cell:	O24	LogR:	-2.75154	#Sigma:	2.351	-	Expt:	1.5	Ctrl:	23.5	mean:	-1.555	stddev:	0.509
Run-Plate:	r1P15	Cell:	O4	LogR:	0.230016	#Sigma:	3.507	+	Expt:	36.5	Ctrl:	29	mean:	-1.555	stddev:	0.509
Run-Plate:	r1P15	Cell:	P10	LogR:	-2.73003	#Sigma:	2.309	-	Expt:	1.5	Ctrl:	23	mean:	-1.555	stddev:	0.509
Run-Plate:	r1P15	Cell:	P13	LogR:	0	#Sigma:	3.055	+	Expt:	0	Ctrl:	21.5	mean:	-1.555	stddev:	0.509
Run-Plate:	r2P6	Cell:	C14	LogR:	-1.87947	#Sigma:	3.304	-	Expt:	10	Ctrl:	65.5	mean:	-0.776	stddev:	0.334
Run-Plate:	r2P6	Cell:	C15	LogR:	-1.94591	#Sigma:	3.503	-	Expt:	5.5	Ctrl:	38.5	mean:	-0.776	stddev:	0.334
Run-Plate:	r2P6	Cell:	C4	LogR:	0	#Sigma:	2.323	+	Expt:	0	Ctrl:	13.5	mean:	-0.776	stddev:	0.334
Run-Plate:	r2P6	Cell:	D22	LogR:	-1.76644	#Sigma:	2.965	-	Expt:	10	Ctrl:	58.5	mean:	-0.776	stddev:	0.334
Run-Plate:	r2P6	Cell:	D9	LogR:	-2.03688	#Sigma:	3.775	-	Expt:	3	Ctrl:	23	mean:	-0.776	stddev:	0.334
Run-Plate:	r2P6	Cell:	G11	LogR:	-2.41591	#Sigma:	4.91	-	Expt:	2.5	Ctrl:	28	mean:	-0.776	stddev:	0.334
Run-Plate:	r2P6	Cell:	I11	LogR:	-1.68176	#Sigma:	2.712	-	Expt:	8	Ctrl:	43	mean:	-0.776	stddev:	0.334
Run-Plate:	r2P6	Cell:	I2	LogR:	-1.74047	#Sigma:	2.888	-	Expt:	5	Ctrl:	28.5	mean:	-0.776	stddev:	0.334
Run-Plate:	r2P6	Cell:	I23	LogR:	0	#Sigma:	2.323	+	Expt:	0	Ctrl:	11.5	mean:	-0.776	stddev:	0.334
Run-Plate:	r2P6	Cell:	J21	LogR:	-1.49549	#Sigma:	2.154	-	Expt:	6.5	Ctrl:	29	mean:	-0.776	stddev:	0.334
Run-Plate:	r2P6	Cell:	K13	LogR:	-1.50408	#Sigma:	2.18	-	Expt:	7	Ctrl:	31.5	mean:	-0.776	stddev:	0.334
Run-Plate:	r2P6	Cell:	L13	LogR:	-3.03255	#Sigma:	6.756	-	Expt:	2	Ctrl:	41.5	mean:	-0.776	stddev:	0.334
Run-Plate:	r2P6	Cell:	L14	LogR:	0.100083	#Sigma:	2.623	+	Expt:	31.5	Ctrl:	28.5	mean:	-0.776	stddev:	0.334
Run-Plate:	r2P6	Cell:	L18	LogR:	0	#Sigma:	2.323	+	Expt:	0	Ctrl:	9	mean:	-0.776	stddev:	0.334
Run-Plate:	r2P6	Cell:	O1	LogR:	-1.44692	#Sigma:	2.009	-	Expt:	4	Ctrl:	17	mean:	-0.776	stddev:	0.334
Run-Plate:	r2P6	Cell:	O3	LogR:	0.0759859	#Sigma:	2.551	+	Expt:	20.5	Ctrl:	19	mean:	-0.776	stddev:	0.334
Run-Plate:	r2P6	Cell:	P13	LogR:	0	#Sigma:	2.323	+	Expt:	0	Ctrl:	5.5	mean:	-0.776	stddev:	0.334
Run-Plate:	r2P6	Cell:	P19	LogR:	-0.0930904	#Sigma:	2.045	+	Expt:	20.5	Ctrl:	22.5	mean:	-0.776	stddev:	0.334
Run-Plate:	r2P6	Cell:	P5	LogR:	-0.081678	#Sigma:	2.079	+	Expt:	23.5	Ctrl:	25.5	mean:	-0.776	stddev:	0.334
Run-Plate:	r2P7	Cell:	A16	LogR:	-0.327213	#Sigma:	2.259	+	Expt:	31	Ctrl:	43	mean:	-1.45	stddev:	0.497
Run-Plate:	r2P7	Cell:	C4	LogR:	0	#Sigma:	2.918	+	Expt:	0	Ctrl:	13.5	mean:	-1.45	stddev:	0.497
Run-Plate:	r2P7	Cell:	D9	LogR:	-2.73003	#Sigma:	2.576	-	Expt:	1.5	Ctrl:	23	mean:	-1.45	stddev:	0.497
Run-Plate:	r2P7	Cell:	G11	LogR:	-3.3322	#Sigma:	3.787	-	Expt:	1	Ctrl:	28	mean:	-1.45	stddev:	0.497
Run-Plate:	r2P7	Cell:	I11	LogR:	-2.50844	#Sigma:	2.13	-	Expt:	3.5	Ctrl:	43	mean:	-1.45	stddev:	0.497
Run-Plate:	r2P7	Cell:	I13	LogR:	-3.02042	#Sigma:	3.16	-	Expt:	2	Ctrl:	41	mean:	-1.45	stddev:	0.497
Run-Plate:	r2P7	Cell:	I15	LogR:	-3.19867	#Sigma:	3.518	-	Expt:	1	Ctrl:	24.5	mean:	-1.45	stddev:	0.497
Run-Plate:	r2P7	Cell:	I23	LogR:	0	#Sigma:	2.918	+	Expt:	0	Ctrl:	11.5	mean:	-1.45	stddev:	0.497
Run-Plate:	r2P7	Cell:	K3	LogR:	0	#Sigma:	2.918	+	Expt:	0	Ctrl:	27	mean:	-1.45	stddev:	0.497
Run-Plate:	r2P7	Cell:	L13	LogR:	0	#Sigma:	2.918	+	Expt:	0	Ctrl:	41.5	mean:	-1.45	stddev:	0.497
Run-Plate:	r2P7	Cell:	L14	LogR:	-0.0918075	#Sigma:	2.733	+	Expt:	26	Ctrl:	28.5	mean:	-1.45	stddev:	0.497
Run-Plate:	r2P7	Cell:	L18	LogR:	0	#Sigma:	2.918	+	Expt:	0	Ctrl:	9	mean:	-1.45	stddev:	0.497
Run-Plate:	r2P7	Cell:	L6	LogR:	-2.77259	#Sigma:	2.661	-	Expt:	2	Ctrl:	32	mean:	-1.45	stddev:	0.497
Run-Plate:	r2P7	Cell:	L9	LogR:	-2.94444	#Sigma:	3.007	-	Expt:	2	Ctrl:	38	mean:	-1.45	stddev:	0.497
Run-Plate:	r2P7	Cell:	O4	LogR:	-3.59731	#Sigma:	4.321	-	Expt:	1	Ctrl:	36.5	mean:	-1.45	stddev:	0.497
Run-Plate:	r2P7	Cell:	O5	LogR:	-2.77259	#Sigma:	2.661	-	Expt:	1	Ctrl:	16	mean:	-1.45	stddev:	0.497
Run-Plate:	r2P7	Cell:	P13	LogR:	0	#Sigma:	2.918	+	Expt:	0	Ctrl:	5.5	mean:	-1.45	stddev:	0.497
Run-Plate:	r2P7	Cell:	P9	LogR:	-2.53897	#Sigma:	2.191	-	Expt:	1.5	Ctrl:	19	mean:	-1.45	stddev:	0.497
Run-Plate:	r1P18	Cell:	C7	LogR:	0.320472	#Sigma:	2.196	+	Expt:	31	Ctrl:	22.5	mean:	-0.156	stddev:	0.217
Run-Plate:	r1P18	Cell:	F10	LogR:	-0.646627	#Sigma:	2.261	-	Expt:	5.5	Ctrl:	10.5	mean:	-0.156	stddev:	0.217
Run-Plate:	r1P18	Cell:	I5	LogR:	0.41616	#Sigma:	2.637	+	Expt:	23.5	Ctrl:	15.5	mean:	-0.156	stddev:	0.217
Run-Plate:	r1P18	Cell:	N1	LogR:	-0.875469	#Sigma:	3.316	-	Expt:	5	Ctrl:	12	mean:	-0.156	stddev:	0.217
Run-Plate:	r1P18	Cell:	N19	LogR:	-0.638087	#Sigma:	2.222	-	Expt:	14	Ctrl:	26.5	mean:	-0.156	stddev:	0.217
Run-Plate:	r1P18	Cell:	O21	LogR:	-0.713766	#Sigma:	2.57	-	Expt:	12	Ctrl:	24.5	mean:	-0.156	stddev:	0.217
Run-Plate:	r1P18	Cell:	O24	LogR:	-0.905709	#Sigma:	3.455	-	Expt:	9.5	Ctrl:	23.5	mean:	-0.156	stddev:	0.217
Run-Plate:	r1P18	Cell:	O4	LogR:	-1.42139	#Sigma:	5.831	-	Expt:	7	Ctrl:	29	mean:	-0.156	stddev:	0.217
Run-Plate:	r1P19	Cell:	B10	LogR:	-0.926762	#Sigma:	2.014	-	Expt:	19	Ctrl:	48	mean:	-0.369	stddev:	0.277
Run-Plate:	r1P19	Cell:	H15	LogR:	-1.50408	#Sigma:	4.098	-	Expt:	5	Ctrl:	22.5	mean:	-0.369	stddev:	0.277
Run-Plate:	r1P19	Cell:	H23	LogR:	-0.925769	#Sigma:	2.01	-	Expt:	10.5	Ctrl:	26.5	mean:	-0.369	stddev:	0.277
Run-Plate:	r1P19	Cell:	H24	LogR:	-1.21924	#Sigma:	3.069	-	Expt:	6.5	Ctrl:	22	mean:	-0.369	stddev:	0.277
Run-Plate:	r1P19	Cell:	I5	LogR:	0.203599	#Sigma:	2.067	+	Expt:	19	Ctrl:	15.5	mean:	-0.369	stddev:	0.277
Run-Plate:	r1P19	Cell:	J15	LogR:	-1.43508	#Sigma:	3.849	-	Expt:	7.5	Ctrl:	31.5	mean:	-0.369	stddev:	0.277
Run-Plate:	r1P19	Cell:	J3	LogR:	0.211309	#Sigma:	2.095	+	Expt:	42	Ctrl:	34	mean:	-0.369	stddev:	0.277
Run-Plate:	r1P19	Cell:	K21	LogR:	-1.07264	#Sigma:	2.54	-	Expt:	6.5	Ctrl:	19	mean:	-0.369	stddev:	0.277
Run-Plate:	r1P19	Cell:	M19	LogR:	-0.925769	#Sigma:	2.01	-	Expt:	10.5	Ctrl:	26.5	mean:	-0.369	stddev:	0.277
Run-Plate:	r1P19	Cell:	M23	LogR:	-1.0068	#Sigma:	2.303	-	Expt:	9.5	Ctrl:	26	mean:	-0.369	stddev:	0.277
Run-Plate:	r1P19	Cell:	N5	LogR:	0.194156	#Sigma:	2.033	+	Expt:	34	Ctrl:	28	mean:	-0.369	stddev:	0.277
Run-Plate:	r1P19	Cell:	O21	LogR:	-1.18377	#Sigma:	2.941	-	Expt:	7.5	Ctrl:	24.5	mean:	-0.369	stddev:	0.277
Run-Plate:	r1P19	Cell:	O3	LogR:	0.439367	#Sigma:	2.918	+	Expt:	22.5	Ctrl:	14.5	mean:	-0.369	stddev:	0.277
Run-Plate:	r1P19	Cell:	O4	LogR:	-1.57554	#Sigma:	4.356	-	Expt:	6	Ctrl:	29	mean:	-0.369	stddev:	0.277
Run-Plate:	r1P19	Cell:	O7	LogR:	0.228259	#Sigma:	2.156	+	Expt:	24.5	Ctrl:	19.5	mean:	-0.369	stddev:	0.277
Run-Plate:	r1P19	Cell:	O9	LogR:	0.194156	#Sigma:	2.033	+	Expt:	25.5	Ctrl:	21	mean:	-0.369	stddev:	0.277
Run-Plate:	r1P19	Cell:	P10	LogR:	0.21441	#Sigma:	2.106	+	Expt:	28.5	Ctrl:	23	mean:	-0.369	stddev:	0.277
Run-Plate:	r1P19	Cell:	P11	LogR:	0.262364	#Sigma:	2.279	+	Expt:	26	Ctrl:	20	mean:	-0.369	stddev:	0.277
Run-Plate:	r2P8	Cell:	A18	LogR:	-0.924259	#Sigma:	2.247	-	Expt:	25	Ctrl:	63	mean:	-0.212	stddev:	0.317
Run-Plate:	r2P8	Cell:	A2	LogR:	-0.882389	#Sigma:	2.115	-	Expt:	18	Ctrl:	43.5	mean:	-0.212	stddev:	0.317
Run-Plate:	r2P8	Cell:	B4	LogR:	-0.95885	#Sigma:	2.356	-	Expt:	23	Ctrl:	60	mean:	-0.212	stddev:	0.317
Run-Plate:	r2P8	Cell:	C12	LogR:	-0.923164	#Sigma:	2.243	-	Expt:	29	Ctrl:	73	mean:	-0.212	stddev:	0.317
Run-Plate:	r2P8	Cell:	D22	LogR:	-1.8718	#Sigma:	5.236	-	Expt:	9	Ctrl:	58.5	mean:	-0.212	stddev:	0.317
Run-Plate:	r2P8	Cell:	D8	LogR:	-1.00145	#Sigma:	2.49	-	Expt:	18	Ctrl:	49	mean:	-0.212	stddev:	0.317
Run-Plate:	r2P8	Cell:	E11	LogR:	-1.18958	#Sigma:	3.084	-	Expt:	17.5	Ctrl:	57.5	mean:	-0.212	stddev:	0.317
Run-Plate:	r2P8	Cell:	G4	LogR:	-1.96944	#Sigma:	5.544	-	Expt:	6	Ctrl:	43	mean:	-0.212	stddev:	0.317
Run-Plate:	r2P8	Cell:	H15	LogR:	-1.28785	#Sigma:	3.394	-	Expt:	8	Ctrl:	29	mean:	-0.212	stddev:	0.317
Run-Plate:	r2P8	Cell:	H2	LogR:	-0.847298	#Sigma:	2.004	-	Expt:	15	Ctrl:	35	mean:	-0.212	stddev:	0.317
Run-Plate:	r2P8	Cell:	I11	LogR:	-0.95784	#Sigma:	2.353	-	Expt:	16.5	Ctrl:	43	mean:	-0.212	stddev:	0.317
Run-Plate:	r2P8	Cell:	L13	LogR:	-1.16074	#Sigma:	2.993	-	Expt:	13	Ctrl:	41.5	mean:	-0.212	stddev:	0.317
Run-Plate:	r2P8	Cell:	M24	LogR:	0.482852	#Sigma:	2.192	+	Expt:	47	Ctrl:	29	mean:	-0.212	stddev:	0.317
Run-Plate:	r2P8	Cell:	N1	LogR:	0.485508	#Sigma:	2.2	+	Expt:	26	Ctrl:	16	mean:	-0.212	stddev:	0.317
Run-Plate:	r2P8	Cell:	N11	LogR:	0.550973	#Sigma:	2.407	+	Expt:	72	Ctrl:	41.5	mean:	-0.212	stddev:	0.317
Run-Plate:	r2P8	Cell:	N13	LogR:	0.570545	#Sigma:	2.469	+	Expt:	11.5	Ctrl:	6.5	mean:	-0.212	stddev:	0.317
Run-Plate:	r2P8	Cell:	O20	LogR:	0.57145	#Sigma:	2.471	+	Expt:	42.5	Ctrl:	24	mean:	-0.212	stddev:	0.317
Run-Plate:	r2P8	Cell:	O22	LogR:	0.510826	#Sigma:	2.28	+	Expt:	42.5	Ctrl:	25.5	mean:	-0.212	stddev:	0.317
Run-Plate:	r2P8	Cell:	O4	LogR:	0.561571	#Sigma:	2.44	+	Expt:	64	Ctrl:	36.5	mean:	-0.212	stddev:	0.317
Run-Plate:	r2P8	Cell:	O5	LogR:	0.782759	#Sigma:	3.138	+	Expt:	35	Ctrl:	16	mean:	-0.212	stddev:	0.317
Run-Plate:	r2P8	Cell:	O7	LogR:	0.430783	#Sigma:	2.028	+	Expt:	30	Ctrl:	19.5	mean:	-0.212	stddev:	0.317
Run-Plate:	r2P8	Cell:	P23	LogR:	0.528844	#Sigma:	2.337	+	Expt:	28	Ctrl:	16.5	mean:	-0.212	stddev:	0.317
Run-Plate:	r2P8	Cell:	P24	LogR:	0.447312	#Sigma:	2.08	+	Expt:	61	Ctrl:	39	mean:	-0.212	stddev:	0.317
Run-Plate:	r2P8	Cell:	P8	LogR:	-1.116	#Sigma:	2.852	-	Expt:	9.5	Ctrl:	29	mean:	-0.212	stddev:	0.317
Run-Plate:	r2P9	Cell:	A16	LogR:	-0.0976385	#Sigma:	2.087	+	Expt:	39	Ctrl:	43	mean:	-1.429	stddev:	0.638
Run-Plate:	r2P9	Cell:	B9	LogR:	0.0333364	#Sigma:	2.292	+	Expt:	30.5	Ctrl:	29.5	mean:	-1.429	stddev:	0.638
Run-Plate:	r2P9	Cell:	C4	LogR:	0	#Sigma:	2.24	+	Expt:	0	Ctrl:	13.5	mean:	-1.429	stddev:	0.638
Run-Plate:	r2P9	Cell:	E22	LogR:	-0.0307717	#Sigma:	2.192	+	Expt:	48	Ctrl:	49.5	mean:	-1.429	stddev:	0.638
Run-Plate:	r2P9	Cell:	G3	LogR:	0	#Sigma:	2.24	+	Expt:	0	Ctrl:	37.5	mean:	-1.429	stddev:	0.638
Run-Plate:	r2P9	Cell:	G4	LogR:	-3.7612	#Sigma:	3.655	-	Expt:	1	Ctrl:	43	mean:	-1.429	stddev:	0.638
Run-Plate:	r2P9	Cell:	H2	LogR:	0	#Sigma:	2.24	+	Expt:	0	Ctrl:	35	mean:	-1.429	stddev:	0.638
Run-Plate:	r2P9	Cell:	I23	LogR:	0.871839	#Sigma:	3.606	+	Expt:	27.5	Ctrl:	11.5	mean:	-1.429	stddev:	0.638
Run-Plate:	r2P9	Cell:	I5	LogR:	-2.70805	#Sigma:	2.005	-	Expt:	2	Ctrl:	30	mean:	-1.429	stddev:	0.638
Run-Plate:	r2P9	Cell:	J15	LogR:	-2.98315	#Sigma:	2.436	-	Expt:	2	Ctrl:	39.5	mean:	-1.429	stddev:	0.638
Run-Plate:	r2P9	Cell:	K7	LogR:	0	#Sigma:	2.24	+	Expt:	0	Ctrl:	33.5	mean:	-1.429	stddev:	0.638
Run-Plate:	r2P9	Cell:	L13	LogR:	0	#Sigma:	2.24	+	Expt:	0	Ctrl:	41.5	mean:	-1.429	stddev:	0.638
Run-Plate:	r2P9	Cell:	L4	LogR:	-3.3673	#Sigma:	3.038	-	Expt:	1	Ctrl:	29	mean:	-1.429	stddev:	0.638
Run-Plate:	r2P9	Cell:	L5	LogR:	-3.17805	#Sigma:	2.741	-	Expt:	1	Ctrl:	24	mean:	-1.429	stddev:	0.638
Run-Plate:	r2P9	Cell:	L6	LogR:	-3.46574	#Sigma:	3.192	-	Expt:	1	Ctrl:	32	mean:	-1.429	stddev:	0.638
Run-Plate:	r2P9	Cell:	L8	LogR:	-2.83321	#Sigma:	2.201	-	Expt:	2	Ctrl:	34	mean:	-1.429	stddev:	0.638
Run-Plate:	r2P9	Cell:	M1	LogR:	0	#Sigma:	2.24	+	Expt:	0	Ctrl:	25.5	mean:	-1.429	stddev:	0.638
Run-Plate:	r2P9	Cell:	M24	LogR:	-0.128617	#Sigma:	2.038	+	Expt:	25.5	Ctrl:	29	mean:	-1.429	stddev:	0.638
Run-Plate:	r2P9	Cell:	M5	LogR:	-3.29584	#Sigma:	2.926	-	Expt:	1	Ctrl:	27	mean:	-1.429	stddev:	0.638
Run-Plate:	r2P9	Cell:	N11	LogR:	0.176279	#Sigma:	2.516	+	Expt:	49.5	Ctrl:	41.5	mean:	-1.429	stddev:	0.638
Run-Plate:	r2P9	Cell:	N4	LogR:	-3.11352	#Sigma:	2.64	-	Expt:	1	Ctrl:	22.5	mean:	-1.429	stddev:	0.638
Run-Plate:	r2P9	Cell:	N8	LogR:	0	#Sigma:	2.24	+	Expt:	0	Ctrl:	25.5	mean:	-1.429	stddev:	0.638
Run-Plate:	r2P9	Cell:	O10	LogR:	0	#Sigma:	2.24	+	Expt:	0	Ctrl:	24.5	mean:	-1.429	stddev:	0.638
Run-Plate:	r2P9	Cell:	O12	LogR:	-3.52636	#Sigma:	3.287	-	Expt:	1	Ctrl:	34	mean:	-1.429	stddev:	0.638
Run-Plate:	r2P9	Cell:	O20	LogR:	0.154151	#Sigma:	2.481	+	Expt:	28	Ctrl:	24	mean:	-1.429	stddev:	0.638
Run-Plate:	r2P9	Cell:	O4	LogR:	0.577075	#Sigma:	3.144	+	Expt:	65	Ctrl:	36.5	mean:	-1.429	stddev:	0.638
Run-Plate:	r2P9	Cell:	P13	LogR:	0	#Sigma:	2.24	+	Expt:	0	Ctrl:	5.5	mean:	-1.429	stddev:	0.638
Run-Plate:	r2P9	Cell:	P8	LogR:	0	#Sigma:	2.24	+	Expt:	0	Ctrl:	29	mean:	-1.429	stddev:	0.638
Run-Plate:	r1P22	Cell:	C7	LogR:	0.218689	#Sigma:	2.133	+	Expt:	28	Ctrl:	22.5	mean:	-0.257	stddev:	0.223
Run-Plate:	r1P22	Cell:	D23	LogR:	-0.722135	#Sigma:	2.086	-	Expt:	25.5	Ctrl:	52.5	mean:	-0.257	stddev:	0.223
Run-Plate:	r1P22	Cell:	D24	LogR:	-1.12134	#Sigma:	3.876	-	Expt:	14.5	Ctrl:	44.5	mean:	-0.257	stddev:	0.223
Run-Plate:	r1P22	Cell:	D9	LogR:	0.296266	#Sigma:	2.481	+	Expt:	19.5	Ctrl:	14.5	mean:	-0.257	stddev:	0.223
Run-Plate:	r1P22	Cell:	F1	LogR:	-0.738957	#Sigma:	2.161	-	Expt:	16	Ctrl:	33.5	mean:	-0.257	stddev:	0.223
Run-Plate:	r1P22	Cell:	F21	LogR:	-0.74841	#Sigma:	2.204	-	Expt:	22	Ctrl:	46.5	mean:	-0.257	stddev:	0.223
Run-Plate:	r1P22	Cell:	F24	LogR:	-1.05939	#Sigma:	3.598	-	Expt:	13	Ctrl:	37.5	mean:	-0.257	stddev:	0.223
Run-Plate:	r1P22	Cell:	G24	LogR:	-1.42403	#Sigma:	5.233	-	Expt:	6.5	Ctrl:	27	mean:	-0.257	stddev:	0.223
Run-Plate:	r1P22	Cell:	H23	LogR:	-1.33123	#Sigma:	4.817	-	Expt:	7	Ctrl:	26.5	mean:	-0.257	stddev:	0.223
Run-Plate:	r1P22	Cell:	H24	LogR:	-1.0116	#Sigma:	3.384	-	Expt:	8	Ctrl:	22	mean:	-0.257	stddev:	0.223
Run-Plate:	r1P22	Cell:	I5	LogR:	0.350202	#Sigma:	2.723	+	Expt:	22	Ctrl:	15.5	mean:	-0.257	stddev:	0.223
Run-Plate:	r1P22	Cell:	J3	LogR:	0.223144	#Sigma:	2.153	+	Expt:	42.5	Ctrl:	34	mean:	-0.257	stddev:	0.223
Run-Plate:	r1P22	Cell:	N5	LogR:	0.251314	#Sigma:	2.279	+	Expt:	36	Ctrl:	28	mean:	-0.257	stddev:	0.223
Run-Plate:	r1P22	Cell:	P10	LogR:	0.282232	#Sigma:	2.418	+	Expt:	30.5	Ctrl:	23	mean:	-0.257	stddev:	0.223
Run-Plate:	r1P22	Cell:	P11	LogR:	0.202941	#Sigma:	2.063	+	Expt:	24.5	Ctrl:	20	mean:	-0.257	stddev:	0.223
Run-Plate:	r1P22	Cell:	P5	LogR:	-0.753772	#Sigma:	2.228	-	Expt:	12	Ctrl:	25.5	mean:	-0.257	stddev:	0.223
Run-Plate:	r2P10	Cell:	C4	LogR:	-1.2164	#Sigma:	8.212	-	Expt:	4	Ctrl:	13.5	mean:	0.196	stddev:	0.172
Run-Plate:	r2P10	Cell:	C8	LogR:	-0.433636	#Sigma:	3.661	-	Expt:	17.5	Ctrl:	27	mean:	0.196	stddev:	0.172
Run-Plate:	r2P10	Cell:	D6	LogR:	-0.194156	#Sigma:	2.268	-	Expt:	28	Ctrl:	34	mean:	0.196	stddev:	0.172
Run-Plate:	r2P10	Cell:	D9	LogR:	-0.427444	#Sigma:	3.625	-	Expt:	15	Ctrl:	23	mean:	0.196	stddev:	0.172
Run-Plate:	r2P10	Cell:	F10	LogR:	-0.832909	#Sigma:	5.982	-	Expt:	10	Ctrl:	23	mean:	0.196	stddev:	0.172
Run-Plate:	r2P10	Cell:	I23	LogR:	0.553385	#Sigma:	2.078	+	Expt:	20	Ctrl:	11.5	mean:	0.196	stddev:	0.172
Run-Plate:	r2P10	Cell:	K13	LogR:	-0.211309	#Sigma:	2.368	-	Expt:	25.5	Ctrl:	31.5	mean:	0.196	stddev:	0.172
Run-Plate:	r2P10	Cell:	K15	LogR:	-0.193371	#Sigma:	2.264	-	Expt:	37.5	Ctrl:	45.5	mean:	0.196	stddev:	0.172
Run-Plate:	r2P10	Cell:	L13	LogR:	-0.341303	#Sigma:	3.124	-	Expt:	29.5	Ctrl:	41.5	mean:	0.196	stddev:	0.172
[truncated: 68 more rows]

## Sheet: Outliers_SCbased
GREY: ignored due to pinning mistake
[truncated: 145 more rows]

## Sheet: Read me
Pinning problems: flagged only the obvious pinning problems; the cases in which the two lineages are behaving differently are not flagged down at this stage
